# Supplementary material for: Metagenomics: An Approach for Unraveling the Community Structure and Functional Potential of Activated Sludge of a Common Effluent Treatment Plant
Source: Front Microbiol. 2022 Jul 18;13:933373. doi: 10.3389/fmicb.2022.933373 (PMC9358654; doi:10.3389/fmicb.2022.933373)
Supplement: Supplementary file 2 [file Table_2.XLSX]

## Sheet: Fig S1
Global Pathways	BS14	SR1
Metabolic pathways	1974	1875
Biosynthesis of secondary metabolites	629	585
Microbial metabolism in diverse environments	669	499
Carbon metabolism	241	179
2-Oxocarboxylic acid metabolism	44	34
Fatty acid metabolism	40	48
Biosynthesis of amino acids	190	153
Nucleotide metabolism	77	82
Biosynthesis of nucleotide sugars	101	96
Biosynthesis of cofactors	264	236
Degradation of aromatic compounds	75	55
The KEGG distribution profile of BS14 and SR1 showing the abundance of different pathways analyzed by GhostKOALA

## Sheet: Fig S2
Functional categories	BS14	SR1
Protein families: genetic information processing	15780	7843
Protein families: signaling and cellular processes	14565	6873
Genetic Information Processing	14220	5536
Environmental Information Processing	13788	5039
Carbohydrate metabolism	10256	4763
Unclassified: metabolism	8408	2638
Amino acid metabolism	7794	2566
Protein families: metabolism	3925	2395
Metabolism of cofactors and vitamins	6329	2178
Energy metabolism	5573	2130
Cellular Processes	3875	2029
Nucleotide metabolism	5071	1697
Human Disease	893	1394
Lipid metabolism	2997	1291
Glycan biosynthesis and metabolism	2722	1158
Metabolism of other amino acids	1412	552
Metabolism of terpenoids and polyketoids	938	320
Xenobiotic degradation	570	275
The Functional categories predicted by KEGG analysis

## Sheet: Fig S3
			Xenobiotic degradation	BS14	SR1
			Benzoate degradation	70	55
			Aminobenzoate degradation	37	19
			Fluorobenzoate degradation	10	8
			Chloroalkane and chloroalkene degradation	16	13
			Chlorocyclohexane and chlorobenzene degradation	18	17
			Toluene degradation	19	12
			Xylene degradation	21	17
			Nitrotoluene degradation	17	6
			Ethylbenzene degradation	4	1
			Styrene degradation	14	13
			Atrazine degradation	8	4
			Caprolactam degradation	11	10
			Bisphenol degradation	2	0
			Dioxin degradation	8	7
			Naphthalene degradation	12	4
			Polycyclic aromatic hydrocarbon degradation	9	3
			Furfural degradation	3	2
			Steroid degradation	12	11
			Metabolism of xenobiotics by cytochrome P450	5	5			The number of ORFs mapped against xenobiotic degradation and metabolism for BS14 and SR1.
			Drug metabolism - cytochrome P450	7	6
			Drug metabolism - other enzymes	20	23

## Sheet: Fig S5
PFAM ID	PFAM Function	BS14	SR1
PF00005	[ABC transporter]	418066	163446
PF02518	[Histidine kinase-, DNA gyrase B-, and HSP90-like ATPase]	261219	94697
PF18760	[]	302635	13364
PF18962	[]	265963	31385
PF00072	[Response regulator receiver domain]	225905	68344
PF00873	[AcrB/AcrD/AcrF family]	182151	87372
PF07690	[Major Facilitator Superfamily]	156721	112241
PF00528	[Binding-protein-dependent transport system inner membrane component]	155260	66392
PF04055	[Radical SAM superfamily]	132154	39102
PF00589	[Phage integrase family]	141146	22972
PF00155	[Aminotransferase class I and II]	104498	53972
PF00171	[Aldehyde dehydrogenase family]	107140	50279
PF00176	[SNF2 family N-terminal domain]	131930	22130
PF00593	[TonB dependent receptor]	98118	52984
PF00271	[Helicase conserved C-terminal domain]	86759	59036
PF02321	[Outer membrane efflux protein]	82283	58102
PF00501	[AMP-binding enzyme]	101151	34729
PF00512	[His Kinase A (phospho-acceptor) domain]	95285	29560
PF00990	[Diguanylate cyclase, GGDEF domain]	89052	35420
PF06048	[Domain of unknown function (DUF927)]	113605	6123
PF00476	[DNA polymerase family A]	107624	10341
PF00361	[Proton-conducting membrane transporter]	82327	32187
PF07715	[TonB-dependent Receptor Plug Domain]	71363	43100
PF00004	[ATPase family associated with various cellular activities (AAA)]	68791	42400
PF00535	[Glycosyl transferase family 2]	77266	31963
PF00892	[EamA-like transporter family]	77198	31190
PF02653	[Branched-chain amino acid transport system / permease component]	82325	22902
PF07992	[Pyridine nucleotide-disulphide oxidoreductase]	77656	24465
PF12705	[PD-(D/E)XK nuclease superfamily]	89703	12030
PF00069	[Protein kinase domain]	14515	86577
PF01609	[Transposase DDE domain]	83488	16014
PF13715	[CarboxypepD_reg-like domain]	69911	29219
PF00270	[DEAD/DEAH box helicase]	56289	41757
PF00009	[Elongation factor Tu GTP binding domain]	64628	32235
PF04851	[Type III restriction enzyme, res subunit]	70681	21558
PF00291	[Pyridoxal-phosphate dependent enzyme]	66210	24560
PF00202	[Aminotransferase class-III]	57368	31350
PF13304	[AAA domain, putative AbiEii toxin, Type IV TA system]	59366	24814
PF16576	[Barrel-sandwich domain of CusB or HlyD membrane-fusion]	58043	25647
PF00106	[short chain dehydrogenase]	57310	25007
PF13561	[Enoyl-(Acyl carrier protein) reductase]	56845	24666
PF00128	[Alpha amylase, catalytic domain]	64499	16478
PF03466	[LysR substrate binding domain]	41817	37416
PF00702	[haloacid dehalogenase-like hydrolase]	50449	27910
PF01979	[Amidohydrolase family]	58732	19349
PF01266	[FAD dependent oxidoreductase]	49640	28055
PF00126	[Bacterial regulatory helix-turn-helix protein, lysR family]	41634	36033
PF18013	[]	73158	3875
PF00145	[C-5 cytosine-specific DNA methylase]	67728	8643
PF00015	[Methyl-accepting chemotaxis protein (MCP) signalling domain]	54539	21441

## Sheet: Fig S6A
KEGG ID and Function	BS14
K00249 acyl-CoA dehydrogenase [EC:1.3.8.7] 49802	49802
K00626 acetyl-CoA C-acetyltransferase [EC:2.3.1.9] 43690	43690
K01915 glutamine synthetase [EC:6.3.1.2] 41430	41430
K00123 formate dehydrogenase major subunit [EC:1.17.1.9] 40708	40708
K01652 acetolactate synthase I/II/III large subunit [EC:2.2.1.6] 33490	33490
K00615 transketolase [EC:2.2.1.1] 32894	32894
K03737 pyruvate-ferredoxin/flavodoxin oxidoreductase [EC:1.2.7.1 1.2.7.-] 32119	32119
K00382 dihydrolipoamide dehydrogenase [EC:1.8.1.4] 31988	31988
K00102 D-lactate dehydrogenase (cytochrome) [EC:1.1.2.4] 31509	31509
K01006 pyruvate, orthophosphate dikinase [EC:2.7.9.1] 30972	30972
K01187 alpha-glucosidase [EC:3.2.1.20] 30300	30300
K01895 acetyl-CoA synthetase [EC:6.2.1.1] 29403	29403
K00128 aldehyde dehydrogenase (NAD+) [EC:1.2.1.3] 28646	28646
K00029 malate dehydrogenase (oxaloacetate-decarboxylating)(NADP+) [EC:1.1.1.40] 27466	27466
K01784 UDP-glucose 4-epimerase [EC:5.1.3.2] 26762	26762
K00688 glycogen phosphorylase [EC:2.4.1.1] 26494	26494
K00164 2-oxoglutarate dehydrogenase E1 component [EC:1.2.4.2] 23934	23934
K00700 1,4-alpha-glucan branching enzyme [EC:2.4.1.18] 23594	23594
K00134 glyceraldehyde 3-phosphate dehydrogenase [EC:1.2.1.12] 23285	23285
K01069 hydroxyacylglutathione hydrolase [EC:3.1.2.6] 23249	23249
K00820 glucosamine---fructose-6-phosphate aminotransferase (isomerizing) [EC:2.6.1.16] 22772	22772
K01681 aconitate hydratase [EC:4.2.1.3] 21772	21772
K01176 alpha-amylase [EC:3.2.1.1] 21640	21640
K01207 beta-N-acetylhexosaminidase [EC:3.2.1.52] 21016	21016
K00873 pyruvate kinase [EC:2.7.1.40] 20710	20710
K01647 citrate synthase [EC:2.3.3.1] 20676	20676
K01190 beta-galactosidase [EC:3.2.1.23] 20452	20452
K03821 polyhydroxyalkanoate synthase subunit PhaC [EC:2.3.1.-] 20246	20246
K01649 2-isopropylmalate synthase [EC:2.3.3.13] 19987	19987
K00627 pyruvate dehydrogenase E2 component (dihydrolipoamide acetyltransferase) [EC:2.3.1.12] 19337	19337
K00010 myo-inositol 2-dehydrogenase / D-chiro-inositol 1-dehydrogenase [EC:1.1.1.18 1.1.1.369] 19243	19243
K01218 mannan endo-1,4-beta-mannosidase [EC:3.2.1.78] 19041	19041
K01966 propionyl-CoA carboxylase beta chain [EC:6.4.1.3 2.1.3.15] 18608	18608
K00031 isocitrate dehydrogenase [EC:1.1.1.42] 18098	18098
K00174 2-oxoglutarate/2-oxoacid ferredoxin oxidoreductase subunit alpha [EC:1.2.7.3 1.2.7.11] 17987	17987
K00248 butyryl-CoA dehydrogenase [EC:1.3.8.1] 17277	17277
K00703 starch synthase [EC:2.4.1.21] 17036	17036
K00705 4-alpha-glucanotransferase [EC:2.4.1.25] 16978	16978
K00239 succinate dehydrogenase / fumarate reductase, flavoprotein subunit [EC:1.3.5.1 1.3.5.4] 16914	16914
K01091 phosphoglycolate phosphatase [EC:3.1.3.18] 16635	16635
K00281 glycine dehydrogenase [EC:1.4.4.2] 16505	16505
K01958 pyruvate carboxylase [EC:6.4.1.1] 16333	16333
K00001 alcohol dehydrogenase [EC:1.1.1.1] 16247	16247
K01847 methylmalonyl-CoA mutase [EC:5.4.99.2] 15957	15957
K01810 glucose-6-phosphate isomerase [EC:5.3.1.9] 15955	15955
K01092 myo-inositol-1(or 4)-monophosphatase [EC:3.1.3.25] 15930	15930
K00600 glycine hydroxymethyltransferase [EC:2.1.2.1] 15704	15704
K01835 phosphoglucomutase [EC:5.4.2.2] 15703	15703
K00948 ribose-phosphate pyrophosphokinase [EC:2.7.6.1] 15632	15632
K01595 phosphoenolpyruvate carboxylase [EC:4.1.1.31] 15458	15458

## Sheet: Fig S6B
KEGG ID and Function	SR1
K00249 acyl-CoA dehydrogenase [EC:1.3.8.7] 17349	17349
K00164 2-oxoglutarate dehydrogenase E1 component [EC:1.2.4.2] 17035	17035
K01915 glutamine synthetase [EC:6.3.1.2] 16690	16690
K00615 transketolase [EC:2.2.1.1] 15361	15361
K00626 acetyl-CoA C-acetyltransferase [EC:2.3.1.9] 14563	14563
K00382 dihydrolipoamide dehydrogenase [EC:1.8.1.4] 14305	14305
K00029 malate dehydrogenase (oxaloacetate-decarboxylating)(NADP+) [EC:1.1.1.40] 14074	14074
K00031 isocitrate dehydrogenase [EC:1.1.1.42] 13192	13192
K00820 glucosamine---fructose-6-phosphate aminotransferase (isomerizing) [EC:2.6.1.16] 13133	13133
K01895 acetyl-CoA synthetase [EC:6.2.1.1] 12831	12831
K00123 formate dehydrogenase major subunit [EC:1.17.1.9] 12342	12342
K00102 D-lactate dehydrogenase (cytochrome) [EC:1.1.2.4] 11833	11833
K00134 glyceraldehyde 3-phosphate dehydrogenase [EC:1.2.1.12] 11512	11512
K01647 citrate synthase [EC:2.3.3.1] 11296	11296
K01069 hydroxyacylglutathione hydrolase [EC:3.1.2.6] 10983	10983
K01681 aconitate hydratase [EC:4.2.1.3] 10930	10930
K00281 glycine dehydrogenase [EC:1.4.4.2] 10658	10658
K00600 glycine hydroxymethyltransferase [EC:2.1.2.1] 10230	10230
K01207 beta-N-acetylhexosaminidase [EC:3.2.1.52] 9836	9836
K01652 acetolactate synthase I/II/III large subunit [EC:2.2.1.6] 9794	9794
K01682 aconitate hydratase 2 / 2-methylisocitrate dehydratase [EC:4.2.1.3 4.2.1.99] 9790	9790
K01595 phosphoenolpyruvate carboxylase [EC:4.1.1.31] 9768	9768
K00948 ribose-phosphate pyrophosphokinase [EC:2.7.6.1] 9652	9652
K01847 methylmalonyl-CoA mutase [EC:5.4.99.2] 9367	9367
K00700 1,4-alpha-glucan branching enzyme [EC:2.4.1.18] 9323	9323
K01187 alpha-glucosidase [EC:3.2.1.20] 8982	8982
K00658 2-oxoglutarate dehydrogenase E2 component (dihydrolipoamide succinyltransferase) [EC:2.3.1.61] 8959	8959
K00239 succinate dehydrogenase / fumarate reductase, flavoprotein subunit [EC:1.3.5.1 1.3.5.4] 8584	8584
K03821 polyhydroxyalkanoate synthase subunit PhaC [EC:2.3.1.-] 8563	8563
K01784 UDP-glucose 4-epimerase [EC:5.1.3.2] 8533	8533
K00698 chitin synthase [EC:2.4.1.16] 8487	8487
K01007 pyruvate, water dikinase [EC:2.7.9.2] 8444	8444
K00873 pyruvate kinase [EC:2.7.1.40] 8375	8375
K01961 acetyl-CoA carboxylase, biotin carboxylase subunit [EC:6.4.1.2 6.3.4.14] 8292	8292
K00627 pyruvate dehydrogenase E2 component (dihydrolipoamide acetyltransferase) [EC:2.3.1.12] 8257	8257
K01689 enolase [EC:4.2.1.11] 8053	8053
K05349 beta-glucosidase [EC:3.2.1.21] 7991	7991
K00163 pyruvate dehydrogenase E1 component [EC:1.2.4.1] 7841	7841
K01638 malate synthase [EC:2.3.3.9] 7711	7711
K00128 aldehyde dehydrogenase (NAD+) [EC:1.2.1.3] 7542	7542
K00927 phosphoglycerate kinase [EC:2.7.2.3] 7514	7514
K01703 3-isopropylmalate/(R)-2-methylmalate dehydratase large subunit [EC:4.2.1.33 4.2.1.35] 7503	7503
K00688 glycogen phosphorylase [EC:2.4.1.1] 7212	7212
K01903 succinyl-CoA synthetase beta subunit [EC:6.2.1.5] 7088	7088
K00790 UDP-N-acetylglucosamine 1-carboxyvinyltransferase [EC:2.5.1.7] 7085	7085
K00012 UDPglucose 6-dehydrogenase [EC:1.1.1.22] 6953	6953
K01810 glucose-6-phosphate isomerase [EC:5.3.1.9] 6943	6943
K01649 2-isopropylmalate synthase [EC:2.3.3.13] 6923	6923
K01692 enoyl-CoA hydratase [EC:4.2.1.17] 6876	6876
K00140 malonate-semialdehyde dehydrogenase (acetylating) / methylmalonate-semialdehyde dehydrogenase [EC:1.2.1.18 1.2.1.27] 6868	6868

## Sheet: Fig 1A
				Taxonomic classification of BS14 for krona plot
1	root	cellular organisms	Bacteria	Proteobacteria	Gammaproteobacteria	Moraxellales	Moraxellaceae	Acinetobacter	Acinetobacter calcoaceticus/baumannii complex	Acinetobacter calcoaceticus
1	root	cellular organisms	Bacteria	Proteobacteria	Betaproteobacteria	Neisseriales	Chromobacteriaceae	Microvirgula	Microvirgula aerodenitrificans
1	root	cellular organisms	Eukaryota	Opisthokonta	Fungi	Dikarya	Basidiomycota	Agaricomycotina	Agaricomycetes	Agaricomycetidae	Boletales	Sclerodermatineae	Sclerodermataceae	Scleroderma	Scleroderma citrinum	Scleroderma citrinum Foug A
1	root	cellular organisms	Bacteria	FCB group	Bacteroidetes/Chlorobi group	Bacteroidetes	Chitinophagia	Chitinophagales	Chitinophagaceae	Filimonas	Filimonas lacunae
1	root	cellular organisms	Bacteria	Terrabacteria group	Actinobacteria	Actinomycetia	Streptomycetales	Streptomycetaceae	Streptomyces	Streptomyces fildesensis
1	root	cellular organisms	Bacteria	Proteobacteria	Alphaproteobacteria	Hyphomicrobiales	Alsobacteraceae	Alsobacter	Alsobacter metallidurans
1	root	cellular organisms	Bacteria	Terrabacteria group	Firmicutes	Bacilli	Bacillales	Thermoactinomycetaceae	Thermoactinomyces	Thermoactinomyces mirandus
1	root	cellular organisms	Bacteria	Proteobacteria	Alphaproteobacteria	Hyphomicrobiales	Rhizobiaceae	Shinella	Shinella zoogloeoides
1	root	cellular organisms	Bacteria	Proteobacteria	Gammaproteobacteria	Enterobacterales	Morganellaceae	Xenorhabdus	Xenorhabdus poinarii	Xenorhabdus poinarii G6
1	root	cellular organisms	Bacteria	Terrabacteria group	Actinobacteria	Actinomycetia	Micrococcales	Microbacteriaceae	Rathayibacter	Rathayibacter oskolensis
1	root	cellular organisms	Bacteria	Proteobacteria	delta/epsilon subdivisions	Deltaproteobacteria	Myxococcales	unclassified Myxococcales	Myxococcales bacterium SG8_38
1	root	cellular organisms	Bacteria	Proteobacteria	Alphaproteobacteria	Rhodospirillales	Acetobacteraceae	Gluconacetobacter	Gluconacetobacter entanii
1	root	cellular organisms	Bacteria	Proteobacteria	Betaproteobacteria	Burkholderiales	Oxalobacteraceae	Collimonas	Collimonas silvisoli
1	root	cellular organisms	Bacteria	Terrabacteria group	Actinobacteria	Actinomycetia	Corynebacteriales	Nocardiaceae
1	root	cellular organisms	Bacteria	Terrabacteria group	Firmicutes	Clostridia	Eubacteriales	Lachnospiraceae	unclassified Lachnospiraceae	Lachnospiraceae bacterium NLAE-zl-G231
1	root	cellular organisms	Bacteria	Proteobacteria	Alphaproteobacteria	Hyphomicrobiales	Rhizobiaceae	Rhizobium/Agrobacterium group	Rhizobium	unclassified Rhizobium	Rhizobium sp. UR51a
1	root	cellular organisms	Bacteria	Terrabacteria group	Actinobacteria	Actinomycetia	Streptomycetales	Streptomycetaceae	Streptomyces	Streptomyces glomeratus
1	root	cellular organisms	Bacteria	Proteobacteria	delta/epsilon subdivisions	Deltaproteobacteria	Myxococcales	Nannocystineae	Nannocystaceae	Plesiocystis	Plesiocystis pacifica
1	root	cellular organisms	Bacteria	Terrabacteria group	Firmicutes	Clostridia	Eubacteriales	Clostridiaceae	Clostridium	Clostridium bovifaecis
1	root	cellular organisms	Bacteria	Proteobacteria	Alphaproteobacteria	Sphingomonadales	Sphingomonadaceae	Novosphingobium	Novosphingobium profundi
1	root	cellular organisms	Bacteria	Proteobacteria	Alphaproteobacteria	Rhodospirillales	Acetobacteraceae	Roseomonas	unclassified Roseomonas	Roseomonas sp. KE2513
1	root	cellular organisms	Bacteria	Proteobacteria	Betaproteobacteria	unclassified Betaproteobacteria	Betaproteobacteria bacterium RIFCSPLOWO2_12_FULL_62_13b
1	root	cellular organisms	Bacteria	Aquificae	Aquificae	Aquificales	Hydrogenothermaceae	Hydrogenothermus	Hydrogenothermus marinus
1	root	cellular organisms	Bacteria	Proteobacteria	Alphaproteobacteria	Rhodospirillales	Azospirillaceae	Azospirillum	unclassified Azospirillum	Azospirillum sp. B21
1	root	cellular organisms	Bacteria	Proteobacteria	delta/epsilon subdivisions	Deltaproteobacteria	Myxococcales	Cystobacterineae	Archangiaceae
1	root	cellular organisms	Bacteria	FCB group	Bacteroidetes/Chlorobi group	Bacteroidetes	Cytophagia	Cytophagales	Cyclobacteriaceae	Cyclobacterium	Cyclobacterium roseum
1	root	cellular organisms	Bacteria	PVC group	Planctomycetes	Candidatus Brocadiia	Candidatus Brocadiales	Candidatus Brocadiaceae	Candidatus Brocadia
1	root	cellular organisms	Bacteria	Proteobacteria	delta/epsilon subdivisions	Deltaproteobacteria	Desulfuromonadales	Desulfuromonadaceae	Desulfuromonas	unclassified Desulfuromonas	Desulfuromonas sp. SDB
1	root	cellular organisms	Bacteria	Proteobacteria	Gammaproteobacteria	Alteromonadales	Alteromonadales genera incertae sedis	Neiella	Neiella holothuriorum
1	root	cellular organisms	Bacteria	Proteobacteria	Betaproteobacteria	Burkholderiales	Comamonadaceae	Comamonas	unclassified Comamonas	Comamonas sp. SCN 65-56
1	root	cellular organisms	Bacteria	Proteobacteria	Alphaproteobacteria	Hyphomicrobiales	Rhizobiaceae	Rhizobium/Agrobacterium group	Agrobacterium	Agrobacterium bohemicum
1	root	cellular organisms	Bacteria	Terrabacteria group	Actinobacteria	Actinomycetia	Streptomycetales	Streptomycetaceae	Streptomyces	Streptomyces poonensis
1	root	cellular organisms	Eukaryota	Sar	Stramenopiles	Oomycota	Saprolegniales	Saprolegniaceae	Aphanomyces
1	root	cellular organisms	Bacteria	Terrabacteria group	Firmicutes	Clostridia	Eubacteriales	Oscillospiraceae	Ruminococcus	environmental samples	Ruminococcus sp. CAG:724
1	root	cellular organisms	Bacteria	Terrabacteria group	Firmicutes	Bacilli	Lactobacillales	Aerococcaceae	Suicoccus	Suicoccus acidiformans
1	root	cellular organisms	Bacteria	FCB group	Bacteroidetes/Chlorobi group	Bacteroidetes	Cytophagia	Cytophagales	Fulvivirgaceae	Fulvivirga	Fulvivirga kasyanovii
1	root	cellular organisms	Bacteria	FCB group	Bacteroidetes/Chlorobi group	Bacteroidetes	Flavobacteriia	Flavobacteriales	Flavobacteriaceae	unclassified Flavobacteriaceae	Flavobacteriaceae bacterium (ex Bugula neritina AB1)
1	root	cellular organisms	Bacteria	Proteobacteria	Alphaproteobacteria	Hyphomicrobiales	Bradyrhizobiaceae	Nitrobacter
1	root	cellular organisms	Bacteria	Proteobacteria	Betaproteobacteria	unclassified Betaproteobacteria	Betaproteobacteria bacterium RIFCSPLOWO2_02_FULL_62_17
1	root	cellular organisms	Bacteria	FCB group	Bacteroidetes/Chlorobi group	Bacteroidetes	Chitinophagia	Chitinophagales	Chitinophagaceae	Niabella	Niabella drilacis
1	root	cellular organisms	Bacteria	Terrabacteria group	Firmicutes	Bacilli	Bacillales	Paenibacillaceae	Paenibacillus	unclassified Paenibacillus	Paenibacillus sp. BK033
1	root	cellular organisms	Bacteria	Proteobacteria	Gammaproteobacteria	Enterobacterales	Pectobacteriaceae	Pectobacterium	Pectobacterium brasiliense
1	root	cellular organisms	Bacteria	Proteobacteria	Betaproteobacteria	Burkholderiales	Oxalobacteraceae	Janthinobacterium	unclassified Janthinobacterium	Janthinobacterium sp. CG3
1	root	cellular organisms	Bacteria	FCB group	Bacteroidetes/Chlorobi group	Bacteroidetes	Flavobacteriia	Flavobacteriales	Flavobacteriaceae	Flavobacterium	Flavobacterium limnosediminis
1	root	cellular organisms	Bacteria	Proteobacteria	Betaproteobacteria	Burkholderiales	Comamonadaceae	Comamonas	Comamonas terrae
2	root	cellular organisms	Bacteria	FCB group	Bacteroidetes/Chlorobi group	Bacteroidetes	Bacteroidia	Bacteroidales	Dysgonomonadaceae	Dysgonomonas	Dysgonomonas alginatilytica
1	root	cellular organisms	Bacteria	Proteobacteria	Gammaproteobacteria	Pasteurellales	Pasteurellaceae	Pasteurella	Pasteurella oralis
1	root	cellular organisms	Bacteria	Proteobacteria	Betaproteobacteria	Burkholderiales	unclassified Burkholderiales	Burkholderiales bacterium JOSHI_001
1	root	Viruses	Duplodnaviria	Heunggongvirae	Uroviricota	Caudoviricetes	Caudovirales	Autographiviridae	Pradovirus	Xylella virus Prado	Xylella phage Prado
1	root	cellular organisms	Bacteria	Proteobacteria	Alphaproteobacteria	Maricaulales	Maricaulaceae	Euryhalocaulis	Euryhalocaulis caribicus
1	root	cellular organisms	Bacteria	FCB group	Bacteroidetes/Chlorobi group	Bacteroidetes	Cytophagia	Cytophagales	Spirosomaceae	Dyadobacter	unclassified Dyadobacter	Dyadobacter sp. 50-39
1	root	cellular organisms	Bacteria	unclassified Bacteria	bacterium BMS3Abin04
1	root	cellular organisms	Bacteria	Proteobacteria	Alphaproteobacteria	Rhodobacterales	Roseobacteraceae	Pacificibacter	Pacificibacter marinus
1	root	cellular organisms	Bacteria	Proteobacteria	Alphaproteobacteria	Parvularculales	Parvularculaceae	Parvularcula	Parvularcula oceani
1	root	cellular organisms	Bacteria	Proteobacteria	Alphaproteobacteria	Rhodobacterales	Rhodobacteraceae	Pararhodobacter	unclassified Pararhodobacter	Pararhodobacter sp. SW119
1	root	cellular organisms	Bacteria	Proteobacteria	Alphaproteobacteria	Rhodobacterales	Rhodobacteraceae	Yoonia	Yoonia maricola
1	root	cellular organisms	Bacteria	Bacteria incertae sedis	Bacteria candidate phyla	Candidatus Aerophobetes	unclassified Aerophobetes	Candidatus Aerophobetes bacterium ADurb.Bin490
1	root	Viruses	Duplodnaviria	Heunggongvirae	Uroviricota	Caudoviricetes	Caudovirales	Podoviridae	unclassified Podoviridae	crAss-like viruses	Cellulophaga phage phi14:2
1	root	cellular organisms	Eukaryota	Haptista	Haptophyta	Pavlovales	Pavlovaceae	Diacronema	Diacronema lutheri
1	root	cellular organisms	Bacteria	FCB group	Bacteroidetes/Chlorobi group	Bacteroidetes	Bacteroidetes Order II. Incertae sedis	Rhodothermaceae	unclassified Rhodothermaceae	Rhodothermaceae bacterium TMED105
1	root	cellular organisms	Bacteria	FCB group	Bacteroidetes/Chlorobi group	Bacteroidetes	unclassified Bacteroidetes	Bacteroidetes bacterium GWE2_42_24
1	root	cellular organisms	Bacteria	Terrabacteria group	Actinobacteria	Actinomycetia	Corynebacteriales	Gordoniaceae	Gordonia	Gordonia desulfuricans
1	root	cellular organisms	Bacteria	FCB group	Bacteroidetes/Chlorobi group	Bacteroidetes	unclassified Bacteroidetes	Bacteroidetes bacterium GWC2_40_13
1	root	cellular organisms	Bacteria	Proteobacteria	Alphaproteobacteria	Rhodobacterales	Rhodobacteraceae	Pseudoroseicyclus	Pseudoroseicyclus tamaricis
1	root	cellular organisms	Bacteria	FCB group	Bacteroidetes/Chlorobi group	Bacteroidetes	Saprospiria	Saprospirales	Haliscomenobacteraceae	Haliscomenobacter	Haliscomenobacter hydrossis
1	root	cellular organisms	Bacteria	Terrabacteria group	Actinobacteria	Candidatus Aquicultoria	Candidatus Aquicultorales	Candidatus Aquicultoraceae	Candidatus Aquicultor	Candidatus Aquicultor secundus
1	root	cellular organisms	Bacteria	Terrabacteria group	Actinobacteria	Actinomycetia	Pseudonocardiales	Pseudonocardiaceae	Pseudonocardia	Pseudonocardia ammonioxydans
1	root	cellular organisms	Bacteria	FCB group	Bacteroidetes/Chlorobi group	Bacteroidetes	Bacteroidia	Marinilabiliales	Marinifilaceae	Marinifilum	Marinifilum fragile
1	root	cellular organisms	Bacteria	Terrabacteria group	Firmicutes	Bacilli	Lactobacillales	Enterococcaceae	Enterococcus	Enterococcus pingfangensis
1	root	cellular organisms	Bacteria	Proteobacteria	Alphaproteobacteria	Hyphomicrobiales	Rhizobiaceae	Rhizobium/Agrobacterium group	Rhizobium	unclassified Rhizobium	Rhizobium sp. EC-SD404
1	root	cellular organisms	Bacteria	Proteobacteria	Alphaproteobacteria	Sphingomonadales	Sphingomonadaceae	Novosphingobium	Novosphingobium pokkalii
1	root	cellular organisms	Bacteria	Terrabacteria group	Actinobacteria	Actinomycetia	Streptomycetales	Streptomycetaceae	Streptomyces	Streptomyces cyanogenus
1	root	cellular organisms	Bacteria	Bacteria incertae sedis	Bacteria candidate phyla	Patescibacteria group	Parcubacteria group	Candidatus Andersenbacteria	Candidatus Andersenbacteria bacterium CG10_big_fil_rev_8_21_14_0_10_54_11
1	root	cellular organisms	Bacteria	Proteobacteria	Gammaproteobacteria	Oceanospirillales	Halomonadaceae	Halomonas	unclassified Halomonas	Halomonas sp. BC04
1	root	cellular organisms	Bacteria	FCB group	Bacteroidetes/Chlorobi group	Bacteroidetes	Cytophagia	Cytophagales	Cytophagaceae	Spirosoma
1	root	cellular organisms	Bacteria	FCB group	Bacteroidetes/Chlorobi group	Bacteroidetes	Cytophagia	Cytophagales	Cytophagaceae	Aquirufa	Aquirufa nivalisilvae
1	root	cellular organisms	Bacteria	FCB group	Bacteroidetes/Chlorobi group	Bacteroidetes	Sphingobacteriia	Sphingobacteriales	Sphingobacteriaceae	Sphingobacterium	Sphingobacterium spiritivorum
1	root	cellular organisms	Bacteria	Aquificae	Aquificae	Aquificales	Aquificaceae	Hydrogenobacter	Hydrogenobacter hydrogenophilus
1	root	cellular organisms	Bacteria	Proteobacteria	Betaproteobacteria	Burkholderiales	Comamonadaceae	Hydrogenophaga	unclassified Hydrogenophaga	Hydrogenophaga sp. A37
1	root	cellular organisms	Bacteria	Proteobacteria	Gammaproteobacteria	Thiotrichales	Piscirickettsiaceae	Cycloclasticus	unclassified Cycloclasticus	Cycloclasticus sp. 46_83_sub15_T18
1	root	cellular organisms	Eukaryota	Sar	Alveolata	Apicomplexa	Aconoidasida	Piroplasmida	Babesiidae	Babesia	Babesia ovata
1	root	cellular organisms	Bacteria	Terrabacteria group	Actinobacteria	Coriobacteriia	Coriobacteriales	Atopobiaceae	Thermophilibacter	Thermophilibacter gallinarum
1	root	cellular organisms	Bacteria	Terrabacteria group	Firmicutes	Bacilli	Bacillales	Planococcaceae	Caryophanon	Caryophanon latum
1	root	cellular organisms	Bacteria	FCB group	Bacteroidetes/Chlorobi group	Bacteroidetes	Flavobacteriia	Flavobacteriales	Flavobacteriaceae	Flavobacterium	unclassified Flavobacterium	Flavobacterium sp. H122
1	root	cellular organisms	Bacteria	Terrabacteria group	Actinobacteria	Actinomycetia	Streptomycetales	Streptomycetaceae	Streptomyces	Streptomyces venezuelae
1	root	cellular organisms	Archaea	Euryarchaeota	Stenosarchaea group	Methanomicrobia	Methanotrichales	Methanotrichaceae	Methanothrix	unclassified Methanothrix	Methanosaeta sp. NSP1
1	root	cellular organisms	Bacteria	PVC group	Planctomycetes	Planctomycetia	Pirellulales	Pirellulaceae	Aureliella	Aureliella helgolandensis
1	root	cellular organisms	Bacteria	FCB group	Bacteroidetes/Chlorobi group	Chlorobi	Chlorobia	Chlorobiales	Chlorobiaceae	Chlorobium/Pelodictyon group
1	root	cellular organisms	Bacteria	Terrabacteria group	Actinobacteria	Acidimicrobiia	Acidimicrobiales	Acidimicrobiaceae	unclassified Acidimicrobiaceae	Acidimicrobiaceae bacterium
1	root	cellular organisms	Bacteria	FCB group	Bacteroidetes/Chlorobi group	Bacteroidetes	Flavobacteriia	Flavobacteriales	Crocinitomicaceae	Crocinitomix	unclassified Crocinitomix	Crocinitomix sp. GM2_3_6_6
1	root	cellular organisms	Bacteria	Acidobacteria	unclassified Acidobacteria	Acidobacteria bacterium RIFCSPLOWO2_02_FULL_61_28
1	root	cellular organisms	Bacteria	Terrabacteria group	Firmicutes	Bacilli	Bacillales	Sporolactobacillaceae	Sporolactobacillus	Sporolactobacillus terrae
1	root	cellular organisms	Bacteria	Terrabacteria group	Cyanobacteria/Melainabacteria group	Cyanobacteria	Synechococcales	Synechococcaceae	Vulcanococcus	Vulcanococcus limneticus
1	root	cellular organisms	Bacteria	FCB group	Bacteroidetes/Chlorobi group	Bacteroidetes	Flavobacteriia	Flavobacteriales	Flavobacteriaceae	Aureicoccus	Aureicoccus marinus
1	root	cellular organisms	Bacteria	Terrabacteria group	Firmicutes	Clostridia	Eubacteriales	Peptococcaceae	Candidatus Formimonas	Candidatus Formimonas warabiya
1	root	cellular organisms	Bacteria	Terrabacteria group	Firmicutes	Bacilli	Bacillales	Staphylococcaceae	Nosocomiicoccus	Nosocomiicoccus ampullae
1	root	cellular organisms	Bacteria	Terrabacteria group	Actinobacteria	Actinomycetia	Streptomycetales	Streptomycetaceae	Streptomyces	unclassified Streptomyces	Streptomyces sp. DH-12
1	root	cellular organisms	Bacteria	Proteobacteria	Betaproteobacteria	Neisseriales	Chromobacteriaceae	Paludibacterium	Paludibacterium paludis
1	root	cellular organisms	Bacteria	Proteobacteria	delta/epsilon subdivisions	Deltaproteobacteria	Myxococcales	Sorangiineae	Polyangiaceae	Polyangium	Polyangium spumosum
1	root	cellular organisms	Bacteria	Bacteria incertae sedis	Bacteria candidate phyla	Candidatus Gribaldobacteria	bacterium (Candidatus Gribaldobacteria) CG08_land_8_20_14_0_20_39_15
1	root	cellular organisms	Bacteria	Proteobacteria	Alphaproteobacteria	Sphingomonadales	Sphingomonadaceae	Sphingomonas	Sphingomonas kyeonggiensis
1	root	cellular organisms	Bacteria	Proteobacteria	Gammaproteobacteria	Chromatiales	Thioalkalibacteraceae	Guyparkeria	Guyparkeria halophila
1	root	cellular organisms	Bacteria	FCB group	Bacteroidetes/Chlorobi group	Bacteroidetes	Sphingobacteriia	Sphingobacteriales	Sphingobacteriaceae	Nubsella	Nubsella zeaxanthinifaciens
1	root	cellular organisms	Bacteria	PVC group	Chlamydiae	Chlamydiia	Parachlamydiales	Parachlamydiaceae	Parachlamydia	unclassified Parachlamydia	Parachlamydia sp. C2
1	root	cellular organisms	Bacteria	Terrabacteria group	Actinobacteria	Actinomycetia	Jiangellales	Jiangellaceae	Jiangella	Jiangella alba
1	root	cellular organisms	Bacteria	Terrabacteria group	Firmicutes	Bacilli	Bacillales	Bacillaceae	Bacillus	Bacillus timonensis
1	root	cellular organisms	Bacteria	Proteobacteria	Alphaproteobacteria	Rhodobacterales	Rhodobacteraceae	Paracoccus	Paracoccus salipaludis
1	root	cellular organisms	Bacteria	Terrabacteria group	Firmicutes	Clostridia	Eubacteriales	Eubacteriaceae	Acetobacterium	Acetobacterium tundrae
1	root	cellular organisms	Bacteria	Proteobacteria	Alphaproteobacteria	Hyphomicrobiales	Rhizobiaceae	Sinorhizobium/Ensifer group	Sinorhizobium	Sinorhizobium medicae
1	root	cellular organisms	Bacteria	Terrabacteria group	Actinobacteria	Actinomycetia	Micrococcales	Intrasporangiaceae	Knoellia	unclassified Knoellia	Knoellia sp. DB2414S
1	root	cellular organisms	Bacteria	Terrabacteria group	Actinobacteria	Actinomycetia	Pseudonocardiales	Pseudonocardiaceae	Amycolatopsis	Amycolatopsis sacchari
1	root	cellular organisms	Bacteria	Bacteria incertae sedis	Bacteria candidate phyla	candidate division KSB1	unclassified candidate division KSB1
1	root	cellular organisms	Bacteria	FCB group	Bacteroidetes/Chlorobi group	Bacteroidetes	Flavobacteriia	Flavobacteriales	Flavobacteriaceae	Myroides	Myroides aquimaris
1	root	cellular organisms	Bacteria	Proteobacteria	Gammaproteobacteria	Chromatiales	Chromatiaceae	Chromatium	Chromatium weissei
1	root	cellular organisms	Bacteria	Terrabacteria group	Firmicutes	Bacilli	Bacillales	Thermoactinomycetaceae	Baia	Baia soyae
1	root	cellular organisms	Bacteria	Proteobacteria	Alphaproteobacteria	Rhodobacterales	Rhodobacteraceae	Rubrimonas	Rubrimonas cliftonensis
1	root	cellular organisms	Bacteria	FCB group	Bacteroidetes/Chlorobi group	Bacteroidetes	Flavobacteriia	Flavobacteriales	Flavobacteriaceae	Tamlana
2	root	cellular organisms	Bacteria	Proteobacteria	Alphaproteobacteria	Caulobacterales	Caulobacteraceae	Caulobacter	unclassified Caulobacter	Caulobacter sp. S6
1	root	cellular organisms	Bacteria	Proteobacteria	Betaproteobacteria	Burkholderiales	Comamonadaceae	Serpentinimonas	Serpentinimonas maccroryi
1	root	cellular organisms	Bacteria	Proteobacteria	Betaproteobacteria	Burkholderiales	Comamonadaceae	Pelomonas	Pelomonas saccharophila
1	root	cellular organisms	Bacteria	Proteobacteria	Alphaproteobacteria	Rhodobacterales	Roseobacteraceae	Ketogulonicigenium	Ketogulonicigenium vulgare
1	root	cellular organisms	Bacteria	Bacteria incertae sedis	Bacteria candidate phyla	Patescibacteria group	Parcubacteria group	unclassified Parcubacteria group	Parcubacteria group bacterium GW2011_GWD2_38_11
1	root	cellular organisms	Bacteria	FCB group	Bacteroidetes/Chlorobi group	Ignavibacteriae
1	root	cellular organisms	Bacteria	PVC group	Planctomycetes	unclassified Planctomycetes	Planctomycetes bacterium MalM25
1	root	cellular organisms	Bacteria	Proteobacteria	Betaproteobacteria	Burkholderiales	Oxalobacteraceae	Massilia group	Duganella	unclassified Duganella	Duganella sp. FT3S
1	root	cellular organisms	Eukaryota	Opisthokonta	Fungi	Dikarya	Ascomycota	saccharomyceta	Pezizomycotina	leotiomyceta	sordariomyceta	Sordariomycetes	Hypocreomycetidae	Hypocreales	Bionectriaceae	Clonostachys	Clonostachys rosea
1	root	cellular organisms	Bacteria	Terrabacteria group	Firmicutes	Clostridia	Eubacteriales	Oscillospiraceae	Faecalibacterium	unclassified Faecalibacterium	Faecalibacterium sp. An77
1	root	cellular organisms	Bacteria	PVC group	Verrucomicrobia	unclassified Verrucomicrobia	Verrucomicrobia bacterium TMED60
1	root	cellular organisms	Bacteria	Proteobacteria	Alphaproteobacteria	Hyphomicrobiales	Phyllobacteriaceae	Mesorhizobium	unclassified Mesorhizobium	Mesorhizobium sp. M7A.F.Ca.MR.362.00.0.0
1	root	cellular organisms	Bacteria	Proteobacteria	Betaproteobacteria	Burkholderiales	Comamonadaceae	Acidovorax	unclassified Acidovorax	Acidovorax sp. D4N7
1	root	cellular organisms	Archaea	Euryarchaeota	Stenosarchaea group	Methanomicrobia	Methanomicrobiales	unclassified Methanomicrobiales	Methanomicrobiales archaeon 53_19
1	root	cellular organisms	Bacteria	Proteobacteria	Betaproteobacteria	Burkholderiales	Comamonadaceae	Comamonas	unclassified Comamonas	Comamonas sp. NyZ500
1	root	cellular organisms	Eukaryota	Sar	Alveolata	Apicomplexa	Conoidasida	Coccidia	Eucoccidiorida	Eimeriorina	Eimeriidae	Eimeria	Eimeria mitis
2	root	cellular organisms	Bacteria	Proteobacteria	Alphaproteobacteria	Rhodospirillales	Acetobacteraceae	Falsiroseomonas	Falsiroseomonas frigidaquae
1	root	cellular organisms	Bacteria	Terrabacteria group	Firmicutes	Clostridia	Eubacteriales	Lachnospiraceae	Anaerotignum	Anaerotignum lactatifermentans
1	root	Viruses	Duplodnaviria	Heunggongvirae	Uroviricota	Caudoviricetes	Caudovirales	Podoviridae	unclassified Podoviridae	Bacillus phage vB_BspP_Dartukuta
1	root	cellular organisms	Bacteria	Proteobacteria	Alphaproteobacteria	Hyphomonadales	Hyphomonadaceae	Ponticaulis	Ponticaulis koreensis
1	root	cellular organisms	Bacteria	Proteobacteria	Gammaproteobacteria	Thiotrichales	Piscirickettsiaceae	unclassified Piscirickettsiaceae	Piscirickettsiaceae bacterium
1	root	cellular organisms	Bacteria	Terrabacteria group	Firmicutes	Clostridia	Eubacteriales	Oscillospiraceae	Ethanoligenens	Ethanoligenens harbinense
1	root	cellular organisms	Bacteria	Terrabacteria group	Chloroflexi	unclassified Chloroflexi	Chloroflexi bacterium RBG_13_50_21
1	root	cellular organisms	Bacteria	Terrabacteria group	Firmicutes	Bacilli	Bacillales	Bacillaceae	Aquibacillus	unclassified Aquibacillus	Aquibacillus sp. KHM2
1	root	cellular organisms	Bacteria	Proteobacteria	Alphaproteobacteria	Caulobacterales	Caulobacteraceae	Brevundimonas	Brevundimonas alba
1	root	cellular organisms	Bacteria	Proteobacteria	Gammaproteobacteria	Cellvibrionales	Microbulbiferaceae	Microbulbifer	Microbulbifer mangrovi
1	root	cellular organisms	Bacteria	Proteobacteria	Gammaproteobacteria	Xanthomonadales	Xanthomonadaceae	Lysobacter	Lysobacter maris
1	root	cellular organisms	Bacteria	Proteobacteria	Alphaproteobacteria	Hyphomicrobiales	Methylobacteriaceae	Microvirga	Microvirga calopogonii
1	root	cellular organisms	Bacteria	FCB group	Bacteroidetes/Chlorobi group	Bacteroidetes	Cytophagia	Cytophagales	Hymenobacteraceae	Hymenobacter	Hymenobacter montanus
1	root	cellular organisms	Bacteria	Proteobacteria	Alphaproteobacteria	Rhodobacterales	Rhodobacteraceae	Methylarcula	Methylarcula marina
2	root	cellular organisms	Bacteria	Proteobacteria	Alphaproteobacteria	Hyphomicrobiales	Brucellaceae	Brucella/Ochrobactrum group
2	root	cellular organisms	Bacteria	Proteobacteria	delta/epsilon subdivisions	Deltaproteobacteria	Desulfuromonadales	unclassified Desulfuromonadales	Desulfuromonadales bacterium GWC2_61_20
2	root	cellular organisms	Bacteria	Terrabacteria group	Chloroflexi	Candidatus Thermofonsia	Phototrophicales	Phototrophicaceae	Phototrophicus	Phototrophicus methaneseepsis
1	root	cellular organisms	Bacteria	Proteobacteria	Alphaproteobacteria	Hyphomicrobiales	Methylobacteriaceae	Microvirga	unclassified Microvirga	Microvirga sp. KLBC 81
1	root	cellular organisms	Bacteria	Proteobacteria	Gammaproteobacteria	Xanthomonadales	Xanthomonadaceae	Luteimonas	unclassified Luteimonas	Luteimonas sp. S4-F44
1	root	cellular organisms	Bacteria	Proteobacteria	Betaproteobacteria	Burkholderiales	Alcaligenaceae	Achromobacter	Achromobacter insuavis
1	root	cellular organisms	Eukaryota	Opisthokonta	Fungi	Dikarya	Basidiomycota	Agaricomycotina	Agaricomycetes	Agaricomycetes incertae sedis	Russulales	Peniophoraceae	Peniophora	unclassified Peniophora	Peniophora sp. CBMAI 1063
1	root	cellular organisms	Bacteria	Terrabacteria group	Firmicutes	Clostridia	Eubacteriales	Oscillospiraceae	Anaerotruncus	unclassified Anaerotruncus	Anaerotruncus sp.
1	root	cellular organisms	Bacteria	Proteobacteria	Alphaproteobacteria	Rhodobacterales	Rhodobacteraceae	Pukyongiella	Pukyongiella litopenaei
1	root	cellular organisms	Bacteria	Terrabacteria group	Firmicutes	Clostridia	Thermoanaerobacterales	Thermoanaerobacterales Family III. Incertae Sedis	Syntrophaceticus	Syntrophaceticus schinkii
1	root	cellular organisms	Bacteria	Proteobacteria	Betaproteobacteria	Burkholderiales	Burkholderiaceae	Paucimonas	Paucimonas lemoignei
1	root	cellular organisms	Eukaryota	Opisthokonta	Fungi	Dikarya	Ascomycota	saccharomyceta	Saccharomycotina	Saccharomycetes	Saccharomycetales	Saccharomycetales incertae sedis	CUG-Ala clade	Pachysolen	Pachysolen tannophilus	Pachysolen tannophilus NRRL Y-2460
1	root	cellular organisms	Bacteria	Terrabacteria group	Actinobacteria	Actinomycetia	Streptomycetales	Streptomycetaceae	Streptomyces	Streptomyces sindenensis
1	root	cellular organisms	Bacteria	Proteobacteria	Betaproteobacteria	Burkholderiales	Alcaligenaceae	Bordetella	Bordetella pertussis
1	root	cellular organisms	Bacteria	Terrabacteria group	Firmicutes	Clostridia	Eubacteriales	Eubacteriaceae	Garciella	Garciella nitratireducens
1	root	cellular organisms	Bacteria	FCB group	Bacteroidetes/Chlorobi group	Bacteroidetes	Flavobacteriia	Flavobacteriales	Weeksellaceae	Chryseobacterium group	Chryseobacterium	Chryseobacterium elymi
1	root	cellular organisms	Bacteria	Terrabacteria group	Firmicutes	Bacilli	Bacillales	Listeriaceae	Listeria	Listeria weihenstephanensis
1	root	cellular organisms	Bacteria	Terrabacteria group	Actinobacteria	Actinomycetia	Micrococcales	Micrococcaceae	Paeniglutamicibacter	Paeniglutamicibacter gangotriensis
2	root	cellular organisms	Bacteria	Terrabacteria group	Firmicutes	Clostridia	Eubacteriales	Eubacteriaceae	Acetobacterium	unclassified Acetobacterium	Acetobacterium sp. KB-1
1	root	cellular organisms	Bacteria	Proteobacteria	Betaproteobacteria	Burkholderiales	Comamonadaceae	Diaphorobacter	unclassified Diaphorobacter	Diaphorobacter sp. MNS-0
1	root	cellular organisms	Bacteria	FCB group	Bacteroidetes/Chlorobi group	Bacteroidetes	Flavobacteriia	Flavobacteriales	Flavobacteriaceae	Lutibacter	unclassified Lutibacter	Lutibacter sp. HS1-25
1	root	cellular organisms	Bacteria	Proteobacteria	Gammaproteobacteria	Pseudomonadales	Pseudomonadaceae	Pseudomonas	Pseudomonas umsongensis
1	root	Viruses	Duplodnaviria	Heunggongvirae	Uroviricota	Caudoviricetes	Caudovirales	Siphoviridae	unclassified Siphoviridae	Phage 65_10
1	root	cellular organisms	Bacteria	Proteobacteria	Gammaproteobacteria	Chromatiales	Chromatiaceae	Thioflavicoccus	Thioflavicoccus mobilis	Thioflavicoccus mobilis 8321
1	root	cellular organisms	Bacteria	PVC group	Planctomycetes	Planctomycetia	Pirellulales	Pirellulaceae	Blastopirellula	unclassified Blastopirellula
2	root	cellular organisms	Bacteria	Proteobacteria	delta/epsilon subdivisions	Deltaproteobacteria	Desulfobacterales	Desulfocapsaceae	Desulfosediminicola	Desulfosediminicola flagellatus
1	root	cellular organisms	Bacteria	Spirochaetes	Spirochaetia	Spirochaetales	Spirochaetaceae	unclassified Spirochaetaceae	Spirochaetaceae bacterium 4572_59
1	root	cellular organisms	Bacteria	Proteobacteria	Candidatus Muproteobacteria	Candidatus Muproteobacteria bacterium RBG_16_64_11
1	root	cellular organisms	Bacteria	Terrabacteria group	Firmicutes	Bacilli	Lactobacillales	Streptococcaceae	Streptococcus	Streptococcus minor
1	root	cellular organisms	Bacteria	Proteobacteria	Alphaproteobacteria	Hyphomicrobiales	Rhizobiaceae	Rhizobium/Agrobacterium group	Rhizobium	Rhizobium mongolense
1	root	cellular organisms	Bacteria	Terrabacteria group	Actinobacteria	Actinomycetia	Micromonosporales	Micromonosporaceae	Actinoplanes	Actinoplanes palleronii
1	root	cellular organisms	Bacteria	FCB group	Bacteroidetes/Chlorobi group	Bacteroidetes	Cytophagia	Cytophagales	Spirosomaceae	Runella	unclassified Runella	Runella sp. SP2
1	root	cellular organisms	Bacteria	Bacteria incertae sedis	Bacteria candidate phyla	Patescibacteria group	Microgenomates group	Candidatus Gottesmanbacteria	Candidatus Gottesmanbacteria bacterium RBG_16_37_8
1	root	cellular organisms	Bacteria	Proteobacteria	Gammaproteobacteria	Pseudomonadales	Marinobacteraceae	Marinobacter	unclassified Marinobacter	Marinobacter sp. CAU 1620
1	root	cellular organisms	Bacteria	Proteobacteria	Alphaproteobacteria	Rhodobacterales	Roseobacteraceae	Ruegeria	Ruegeria conchae
1	root	cellular organisms	Bacteria	Proteobacteria	Gammaproteobacteria	Alteromonadales	Shewanellaceae	Shewanella	unclassified Shewanella	Shewanella sp. CG18_big_fil_WC_8_21_14_2_50_42_11
1	root	cellular organisms	Bacteria	FCB group	Bacteroidetes/Chlorobi group	Bacteroidetes	Flavobacteriia	Flavobacteriales	Flavobacteriaceae	Flavobacterium	Flavobacterium lotistagni
1	root	cellular organisms	Bacteria	Thermotogae	Thermotogae	Petrotogales	Petrotogaceae	Petrotoga	Petrotoga mobilis
1	root	cellular organisms	Bacteria	Proteobacteria	Betaproteobacteria	Burkholderiales	Burkholderiales genera incertae sedis	Thiomonas	unclassified Thiomonas	Thiomonas sp. X19
1	root	cellular organisms	Bacteria	PVC group	Verrucomicrobia	Verrucomicrobiae	Verrucomicrobiales	Verrucomicrobiaceae	unclassified Verrucomicrobiaceae	Verrucomicrobiaceae bacterium TMED86
1	root	cellular organisms	Bacteria	Proteobacteria	Gammaproteobacteria	Oceanospirillales	Halomonadaceae	Halomonas	Halomonas muralis
1	root	cellular organisms	Bacteria	FCB group	Bacteroidetes/Chlorobi group	Bacteroidetes	Cytophagia	Cytophagales	Hymenobacteraceae	Hymenobacter	unclassified Hymenobacter	Hymenobacter sp. BT728
1	root	cellular organisms	Bacteria	Proteobacteria	Alphaproteobacteria	Sphingomonadales	Sphingomonadaceae	Sphingomonas	unclassified Sphingomonas	Sphingomonas sp. XMGL2
1	root	cellular organisms	Bacteria	FCB group	Bacteroidetes/Chlorobi group	Bacteroidetes	Cytophagia	Cytophagales	Spirosomaceae	Emticicia
1	root	cellular organisms	Eukaryota	Viridiplantae	Chlorophyta	core chlorophytes	Chlorophyceae	CS clade	Chlamydomonadales	Volvocaceae	Gonium	Gonium pectorale
1	root	cellular organisms	Bacteria	FCB group	Bacteroidetes/Chlorobi group	Bacteroidetes	Bacteroidia	Bacteroidales	Bacteroidales incertae sedis	Candidatus Azobacteroides	Candidatus Azobacteroides pseudotrichonymphae	Candidatus Azobacteroides pseudotrichonymphae genomovar. CFP2
1	root	cellular organisms	Bacteria	Terrabacteria group	Actinobacteria	Actinomycetia	Corynebacteriales	Mycobacteriaceae	Mycolicibacterium	Mycolicibacterium mageritense
1	root	cellular organisms	Bacteria	Terrabacteria group	Actinobacteria	Actinomycetia	Micromonosporales	Micromonosporaceae	Micromonospora	Micromonospora siamensis
1	root	cellular organisms	Bacteria	Nitrospirae	Thermodesulfovibrionia	Thermodesulfovibrionales	Thermodesulfovibrionaceae	Thermodesulfovibrio	unclassified Thermodesulfovibrio	Thermodesulfovibrio sp. N1
1	root	cellular organisms	Bacteria	PVC group	Planctomycetes	unclassified Planctomycetes	Planctomycetes bacterium K23_9
1	root	cellular organisms	Archaea	TACK group	Candidatus Bathyarchaeota	MCG-15	miscellaneous Crenarchaeota group-15 archaeon DG-45
1	root	cellular organisms	Bacteria	FCB group	Bacteroidetes/Chlorobi group	Bacteroidetes	Bacteroidia	Bacteroidales	Rikenellaceae	Gallalistipes	Gallalistipes aquisgranensis
1	root	cellular organisms	Bacteria	Proteobacteria	Betaproteobacteria	Neisseriales	Neisseriaceae	Amantichitinum	Amantichitinum ursilacus
1	root	Viruses	Duplodnaviria	Heunggongvirae	Uroviricota	Caudoviricetes	Caudovirales	Myoviridae	unclassified Myoviridae	Synechococcus phage ACG-2014i
3	root	cellular organisms	Bacteria	Proteobacteria	Alphaproteobacteria	Rhodobacterales	Rhodobacteraceae	Thioclava	Thioclava atlantica
1	root	cellular organisms	Bacteria	Terrabacteria group	Firmicutes	Clostridia	Thermoanaerobacterales	Thermoanaerobacteraceae	Thermoanaerobacter	unclassified Thermoanaerobacter	Thermoanaerobacter sp. CM-CNRG TB177
1	root	cellular organisms	Bacteria	Proteobacteria	Alphaproteobacteria	Hyphomicrobiales	Phyllobacteriaceae	Phyllobacterium	unclassified Phyllobacterium	Phyllobacterium sp. 628
1	root	cellular organisms	Bacteria	Terrabacteria group	Actinobacteria	Actinomycetia	Streptomycetales	Streptomycetaceae	Streptomyces	Streptomyces yeochonensis
1	root	cellular organisms	Bacteria	Terrabacteria group	Actinobacteria	Actinomycetia	Streptosporangiales	Nocardiopsaceae	Spiractinospora	Spiractinospora alimapuensis
1	root	cellular organisms	Bacteria	Spirochaetes	Spirochaetia	Spirochaetales	Treponemataceae	Treponema	unclassified Treponema	Treponema sp.
1	root	cellular organisms	Bacteria	Bacteria incertae sedis	Bacteria candidate phyla	Patescibacteria group	Parcubacteria group	Candidatus Moranbacteria	Candidatus Moranbacteria bacterium CG_4_9_14_3_um_filter_42_9
1	root	cellular organisms	Bacteria	Proteobacteria	Alphaproteobacteria	Rhodospirillales	Rhodospirillaceae	unclassified Rhodospirillaceae	Rhodospirillaceae bacterium TMED8
1	root	cellular organisms	Bacteria	Terrabacteria group	Cyanobacteria/Melainabacteria group	Cyanobacteria	Nostocales	Calotrichaceae	Calothrix	unclassified Calothrix	Calothrix sp. PCC 7716
1	root	cellular organisms	Eukaryota	Opisthokonta	Fungi	Dikarya	Ascomycota	saccharomyceta	Saccharomycotina	Saccharomycetes	Saccharomycetales	Trichomonascaceae	Wickerhamiella	Wickerhamiella sorbophila
1	root	cellular organisms	Bacteria	Proteobacteria	Alphaproteobacteria	Hyphomicrobiales	Chelatococcaceae	Chelatococcus	Chelatococcus composti
1	root	cellular organisms	Bacteria	Proteobacteria	Alphaproteobacteria	Sphingomonadales	Erythrobacteraceae	Erythrobacter/Porphyrobacter group	Erythrobacter	unclassified Erythrobacter	Erythrobacter sp. SCN 62-14
1	root	cellular organisms	Bacteria	Proteobacteria	Betaproteobacteria	Neisseriales	Neisseriaceae	Vitreoscilla	unclassified Vitreoscilla	Vitreoscilla sp. C1
1	root	cellular organisms	Bacteria	Proteobacteria	Gammaproteobacteria	Pasteurellales	Pasteurellaceae	Rodentibacter
1	root	cellular organisms	Bacteria	FCB group	Bacteroidetes/Chlorobi group	Bacteroidetes	Flavobacteriia	Flavobacteriales	Flavobacteriaceae	Muricauda	Muricauda hymeniacidonis
1	root	cellular organisms	Bacteria	Terrabacteria group	Actinobacteria	Actinomycetia	Streptomycetales	Streptomycetaceae	Streptomyces	unclassified Streptomyces	Streptomyces sp. PLAI1-29
1	root	cellular organisms	Bacteria	Proteobacteria	Alphaproteobacteria	Rhodospirillales	Azospirillaceae	Niveispirillum	Niveispirillum lacus
1	root	Viruses	Duplodnaviria	Heunggongvirae	Uroviricota	Caudoviricetes	Caudovirales	Podoviridae	unclassified Podoviridae	Dunaliella viridis virus SI2
1	root	cellular organisms	Bacteria	Proteobacteria	Alphaproteobacteria	Kordiimonadales	Kordiimonadaceae	Kordiimonas	Kordiimonas gwangyangensis
1	root	cellular organisms	Eukaryota	Viridiplantae	Chlorophyta	core chlorophytes	Chlorophyceae	CS clade	Chlamydomonadales	Chlamydomonadaceae	Chlamydomonas	Chlamydomonas reinhardtii
1	root	cellular organisms	Bacteria	Terrabacteria group	Firmicutes	Clostridia	Eubacteriales	Peptococcaceae	Pelotomaculum	unclassified Pelotomaculum	Pelotomaculum sp. PtaU1.Bin065
2	root	cellular organisms	Bacteria	Proteobacteria	Alphaproteobacteria	Magnetococcales	Magnetococcaceae	Magnetofaba	Magnetofaba australis
2	root	cellular organisms	Bacteria	Terrabacteria group	Cyanobacteria/Melainabacteria group	Cyanobacteria	Pseudanabaenales	Leptolyngbyaceae	Phormidesmis	unclassified Phormidesmis	cf. Phormidesmis sp. LEGE 11477
1	root	cellular organisms	Bacteria	Terrabacteria group	Firmicutes	environmental samples	Firmicutes bacterium enrichment culture clone fosmid MGS-M1
1	root	cellular organisms	Bacteria	Proteobacteria	Alphaproteobacteria	Hyphomicrobiales	Rhizobiaceae	Rhizobium/Agrobacterium group	Neorhizobium	unclassified Neorhizobium	Neorhizobium sp. T786
1	root	cellular organisms	Bacteria	Terrabacteria group	Firmicutes	Bacilli	Bacillales	Paenibacillaceae	Paenibacillus	Paenibacillus faecis
1	root	cellular organisms	Bacteria	Terrabacteria group	Firmicutes	Clostridia	Eubacteriales	Lachnospiraceae	Butyrivibrio	environmental samples	Butyrivibrio sp. CAG:318
1	root	cellular organisms	Bacteria	Proteobacteria	Betaproteobacteria	Burkholderiales	Comamonadaceae	Acidovorax	unclassified Acidovorax	Acidovorax sp. 106
1	root	cellular organisms	Bacteria	Terrabacteria group	Firmicutes	Bacilli	Lactobacillales	Streptococcaceae	Lactococcus	Lactococcus petauri
1	root	cellular organisms	Bacteria	Proteobacteria	Alphaproteobacteria	Hyphomicrobiales	Bradyrhizobiaceae	Afipia	Afipia birgiae
1	root	cellular organisms	Bacteria	Proteobacteria	Alphaproteobacteria	Hyphomicrobiales	Bradyrhizobiaceae	Bradyrhizobium	Bradyrhizobium acaciae
1	root	cellular organisms	Bacteria	Proteobacteria	Alphaproteobacteria	Sphingomonadales	Sphingomonadaceae	Novosphingobium	unclassified Novosphingobium	Novosphingobium sp. Fuku2-ISO-50
1	root	cellular organisms	Bacteria	FCB group	Bacteroidetes/Chlorobi group	Chlorobi	Chlorobia	Chlorobiales	Chlorobiaceae	Chlorobium/Pelodictyon group	Pelodictyon	Pelodictyon phaeoclathratiforme
1	root	cellular organisms	Bacteria	Proteobacteria	Gammaproteobacteria	Legionellales	Legionellaceae	Legionella	Legionella lansingensis
1	root	cellular organisms	Bacteria	Terrabacteria group	Actinobacteria	Actinomycetia	Streptomycetales	Streptomycetaceae	Streptomyces	Streptomyces populi
1	root	cellular organisms	Bacteria	Proteobacteria	Alphaproteobacteria	Rhodobacterales	Rhodobacteraceae	Puniceibacterium	Puniceibacterium antarcticum
1	root	cellular organisms	Bacteria	Proteobacteria	Alphaproteobacteria	Rhodospirillales	Acetobacteraceae	Roseomonas	Roseomonas aestuarii
1	root	cellular organisms	Bacteria	Proteobacteria	Alphaproteobacteria	Hyphomicrobiales	Rhizobiaceae	Rhizobium/Agrobacterium group	Rhizobium	unclassified Rhizobium	Rhizobium sp. 11515TR
1	root	cellular organisms	Bacteria	Proteobacteria	Gammaproteobacteria	Xanthomonadales	Xanthomonadaceae	Stenotrophomonas	unclassified Stenotrophomonas	Stenotrophomonas sp. MYb238
1	root	cellular organisms	Bacteria	Proteobacteria	Alphaproteobacteria	Sphingomonadales	Sphingomonadaceae	Rhizorhabdus	Rhizorhabdus wittichii
1	root	cellular organisms	Bacteria	FCB group	Bacteroidetes/Chlorobi group	Bacteroidetes	Cytophagia	Cytophagales	Hymenobacteraceae	Hymenobacter	Hymenobacter coccineus
1	root	cellular organisms	Bacteria	Terrabacteria group	Actinobacteria	Actinomycetia	Bifidobacteriales	Bifidobacteriaceae	Bifidobacterium	Bifidobacterium animalis	Bifidobacterium animalis subsp. lactis
1	root	cellular organisms	Bacteria	Terrabacteria group	Firmicutes	environmental samples	Firmicutes bacterium CAG:646
1	root	cellular organisms	Bacteria	unclassified Bacteria	bacterium TMED190
1	root	cellular organisms	Bacteria	FCB group	Bacteroidetes/Chlorobi group	Bacteroidetes	Bacteroidia	Bacteroidales	Bacteroidaceae	Bacteroides	environmental samples	uncultured Bacteroides sp.
1	root	cellular organisms	Bacteria	Proteobacteria	Gammaproteobacteria	Moraxellales	Moraxellaceae	Psychrobacter	unclassified Psychrobacter	Psychrobacter sp. Rd 27.2
1	root	cellular organisms	Bacteria	unclassified Bacteria	bacterium K02(2017)
1	root	cellular organisms	Bacteria	Terrabacteria group	Firmicutes	Clostridia	Eubacteriales	Lachnospiraceae	Epulopiscium	unclassified Epulopiscium
2	root	cellular organisms	Bacteria	Proteobacteria	Alphaproteobacteria	unclassified Alphaproteobacteria	Alphaproteobacteria bacterium 13_2_20CM_2_64_7
2	root	cellular organisms	Bacteria	Proteobacteria	delta/epsilon subdivisions	Epsilonproteobacteria	Campylobacterales	Campylobacteraceae	Campylobacter	Campylobacter curvus
1	root	cellular organisms	Bacteria	Proteobacteria	delta/epsilon subdivisions	Deltaproteobacteria	Desulfobacterales	Desulfobacteraceae	Desulfobacterium	unclassified Desulfobacterium	Desulfobacterium sp. 4572_20
1	root	cellular organisms	Bacteria	Proteobacteria	Gammaproteobacteria	Pseudomonadales	Pseudomonadaceae	Pseudomonas	unclassified Pseudomonas	Pseudomonas sp. PGPPP3
1	root	cellular organisms	Bacteria	Proteobacteria	Betaproteobacteria	Burkholderiales	Burkholderiales genera incertae sedis	Tepidimonas	Tepidimonas aquatica
1	root	cellular organisms	Bacteria	Proteobacteria	Alphaproteobacteria	Rhodobacterales	Rhodobacteraceae	Aestuariicoccus	unclassified Aestuariicoccus	Aestuariicoccus sp. KMU-90
1	root	cellular organisms	Bacteria	Terrabacteria group	Actinobacteria	Actinomycetia	Micromonosporales	Micromonosporaceae	Catellatospora	Catellatospora coxensis
1	root	cellular organisms	Bacteria	Terrabacteria group	Firmicutes	Clostridia	Eubacteriales	unclassified Eubacteriales	Clostridiales bacterium GWF2_38_85
1	root	cellular organisms	Bacteria	Proteobacteria	Alphaproteobacteria	Hyphomicrobiales	Kaistiaceae	Kaistia
1	root	cellular organisms	Bacteria	Proteobacteria	Alphaproteobacteria	Pelagibacterales	Pelagibacteraceae	Candidatus Pelagibacter	unclassified Candidatus Pelagibacter	Candidatus Pelagibacter sp. TMED239
1	root	cellular organisms	Bacteria	Proteobacteria	Gammaproteobacteria	Oceanospirillales	Oceanospirillaceae	Marinobacterium	Marinobacterium sediminicola
1	root	cellular organisms	Bacteria	Proteobacteria	Alphaproteobacteria	Hyphomicrobiales	Devosiaceae	Pelagibacterium	Pelagibacterium luteolum
1	root	cellular organisms	Bacteria	Acidobacteria	Acidobacteriia	Bryobacterales	Solibacteraceae	Candidatus Sulfopaludibacter	unclassified Candidatus Sulfopaludibacter	Candidatus Sulfopaludibacter sp. SbA3
1	root	cellular organisms	Bacteria	FCB group	Bacteroidetes/Chlorobi group	Bacteroidetes	Cytophagia	Cytophagales	Spirosomaceae	Dyadobacter
1	root	cellular organisms	Eukaryota	Opisthokonta	Fungi	Fungi incertae sedis	Mucoromycota	Mortierellomycotina	Mortierellomycetes	Mortierellales	Mortierellaceae	Lunasporangiospora	Lunasporangiospora selenospora
1	root	cellular organisms	Bacteria	Acidobacteria	Acidobacteriia	Acidobacteriales	Acidobacteriaceae	Candidatus Sulfotelmatomonas	Candidatus Sulfotelmatomonas gaucii
1	root	cellular organisms	Bacteria	Proteobacteria	Betaproteobacteria	Burkholderiales	Comamonadaceae	Acidovorax	Acidovorax wautersii
1	root	cellular organisms	Bacteria	Terrabacteria group	Firmicutes	Clostridia	Eubacteriales	Oscillospiraceae	Oscillibacter	Oscillibacter valericigenes	Oscillibacter valericigenes Sjm18-20
1	root	cellular organisms	Bacteria	FCB group	Bacteroidetes/Chlorobi group	Bacteroidetes	Flavobacteriia	Flavobacteriales	Vicingaceae	Vicingus	Vicingus serpentipes
1	root	cellular organisms	Bacteria	Terrabacteria group	Actinobacteria	Actinomycetia	Corynebacteriales	Nocardiaceae	Rhodococcus	Rhodococcus jostii
1	root	cellular organisms	Bacteria	Proteobacteria	Betaproteobacteria	unclassified Betaproteobacteria	beta proteobacterium MWH-P2sevCIIIb
1	root	cellular organisms	Bacteria	Terrabacteria group	Firmicutes	Bacilli	Bacillales	Paenibacillaceae	Brevibacillus	Brevibacillus borstelensis
2	root	cellular organisms	Bacteria	Proteobacteria	Alphaproteobacteria	Hyphomicrobiales	Bradyrhizobiaceae	Bradyrhizobium	Bradyrhizobium lablabi
1	root	cellular organisms	Bacteria	Proteobacteria	Gammaproteobacteria	Xanthomonadales	Xanthomonadaceae	Xanthomonas	unclassified Xanthomonas	Xanthomonas sp. XNM01
1	root	cellular organisms	Bacteria	Terrabacteria group	Firmicutes	Bacilli	Bacillales	Bacillaceae	Bacillus	unclassified Bacillus (in: Bacteria)	Bacillus sp. FJAT-26390
1	root	cellular organisms	Bacteria	Terrabacteria group	Firmicutes	Clostridia	Eubacteriales	Lachnospiraceae	Lachnobacterium	Lachnobacterium bovis
1	root	cellular organisms	Bacteria	Terrabacteria group	Actinobacteria	Coriobacteriia	Coriobacteriales	Coriobacteriaceae	Collinsella	Collinsella stercoris	Collinsella stercoris DSM 13279
1	root	cellular organisms	Bacteria	Proteobacteria	Betaproteobacteria	Nitrosomonadales	Methylophilaceae	Methylotenera	unclassified Methylotenera	Methylotenera sp. RIFCSPLOWO2_02_FULL_45_14
1	root	cellular organisms	Bacteria	Aquificae	Aquificae	Aquificales	Aquificaceae	Hydrogenobaculum	unclassified Hydrogenobaculum
1	root	cellular organisms	Bacteria	PVC group	Verrucomicrobia	Verrucomicrobiae	Verrucomicrobiales	Akkermansiaceae	Akkermansia	Akkermansia glycaniphila
1	root	cellular organisms	Bacteria	Terrabacteria group	Actinobacteria	Actinomycetia	Streptomycetales	Streptomycetaceae	Streptomyces	Streptomyces gilvigriseus
1	root	cellular organisms	Bacteria	Proteobacteria	Alphaproteobacteria	Rhodospirillales	Azospirillaceae	Skermanella
1	root	cellular organisms	Bacteria	Proteobacteria	Betaproteobacteria	Nitrosomonadales	unclassified Nitrosomonadales	Gallionellales bacterium RIFCSPHIGHO2_02_FULL_57_16
1	root	Viruses	Duplodnaviria	Heunggongvirae	Uroviricota	Caudoviricetes	Caudovirales	Siphoviridae	unclassified Siphoviridae	Arthrobacter phage Wollypog
1	root	cellular organisms	Bacteria	FCB group	Bacteroidetes/Chlorobi group	Bacteroidetes	Bacteroidia	Bacteroidales	Prevotellaceae	Prevotella	unclassified Prevotella	Prevotella sp. MGM1
1	root	cellular organisms	Eukaryota	Opisthokonta	Fungi	Dikarya	Ascomycota	saccharomyceta	Pezizomycotina	leotiomyceta	sordariomyceta	Sordariomycetes	Hypocreomycetidae	Hypocreales	Clavicipitaceae	Torrubiella	Torrubiella hemipterigena
1	root	cellular organisms	Bacteria	Proteobacteria	Alphaproteobacteria	Hyphomicrobiales	Brucellaceae	Brucella/Ochrobactrum group	Ochrobactrum	unclassified Ochrobactrum	Ochrobactrum sp. J50
2	root	cellular organisms	Bacteria	FCB group	Bacteroidetes/Chlorobi group	Bacteroidetes	Cytophagia	Cytophagales	Hymenobacteraceae	Pontibacter	Pontibacter flavimaris
1	root	cellular organisms	Bacteria	Proteobacteria	Betaproteobacteria	Burkholderiales	Burkholderiaceae	Pandoraea	unclassified Pandoraea	Pandoraea sp. SD6-2
1	root	cellular organisms	Eukaryota	Opisthokonta	Fungi	Dikarya	Basidiomycota	Agaricomycotina	Agaricomycetes	Agaricomycetes incertae sedis	Polyporales	Irpicaceae	Irpex	Irpex lacteus
1	root	cellular organisms	Bacteria	PVC group	Verrucomicrobia	Opitutae	unclassified Opitutae	Opitutae bacterium Tous-C10FEB
1	root	cellular organisms	Bacteria	Terrabacteria group	Actinobacteria	Actinomycetia	Propionibacteriales	Nocardioidaceae	Micropruina	unclassified Micropruina	Micropruina sp.
1	root	cellular organisms	Bacteria	Proteobacteria	Gammaproteobacteria	Moraxellales	Moraxellaceae	Acinetobacter	Acinetobacter johnsonii
1	root	cellular organisms	Bacteria	Proteobacteria	Gammaproteobacteria	Cellvibrionales	Cellvibrionaceae	Teredinibacter	Teredinibacter haidensis
1	root	cellular organisms	Bacteria	Terrabacteria group	Actinobacteria	Actinomycetia	Micrococcales	Micrococcaceae	Arthrobacter	unclassified Arthrobacter	Arthrobacter sp. AK-YN10
1	root	cellular organisms	Bacteria	Terrabacteria group	Firmicutes	Bacilli	Bacillales	Bacillaceae	Bacillus	unclassified Bacillus (in: Bacteria)	Bacillus sp. UNCCL81
1	root	cellular organisms	Bacteria	Terrabacteria group	Actinobacteria	unclassified Actinobacteria	Actinobacteria bacterium RBG_13_35_12
1	root	cellular organisms	Bacteria	Terrabacteria group	Firmicutes	Clostridia	Eubacteriales	Lachnospiraceae	Blautia	unclassified Blautia	Blautia sp. An249
1	root	cellular organisms	Bacteria	Terrabacteria group	Firmicutes	Bacilli	Bacillales	Paenibacillaceae	Aneurinibacillus group	Ammoniphilus	Ammoniphilus resinae
1	root	cellular organisms	Bacteria	Terrabacteria group	Chloroflexi	Anaerolineae	Anaerolineales	Anaerolineaceae	unclassified Anaerolineaceae	Anaerolineaceae bacterium 4572_5.1
1	root	cellular organisms	Bacteria	FCB group	Bacteroidetes/Chlorobi group	Bacteroidetes	Flavobacteriia	Flavobacteriales	Flavobacteriaceae	Polaribacter	unclassified Polaribacter	Polaribacter sp. ALD11
2	root	cellular organisms	Bacteria	Terrabacteria group	Firmicutes	Bacilli	Bacillales	Staphylococcaceae	Mammaliicoccus
1	root	cellular organisms	Archaea	Euryarchaeota	Stenosarchaea group	Methanomicrobia
1	root	cellular organisms	Bacteria	Proteobacteria	Alphaproteobacteria	Caulobacterales	Caulobacteraceae	Asticcacaulis	unclassified Asticcacaulis	Asticcacaulis sp. AND118
1	root	cellular organisms	Bacteria	Proteobacteria	delta/epsilon subdivisions	Deltaproteobacteria	Myxococcales	Nannocystineae	Nannocystaceae	Nannocystis
1	root	cellular organisms	Bacteria	Terrabacteria group	Firmicutes	Clostridia	Eubacteriales	Lachnospiraceae	Blautia
1	root	cellular organisms	Bacteria	Proteobacteria	delta/epsilon subdivisions	Deltaproteobacteria	Desulfobacterales	Desulfobacteraceae	Desulforegula	Desulforegula conservatrix
1	root	cellular organisms	Bacteria	FCB group	Bacteroidetes/Chlorobi group	Bacteroidetes	Cytophagia	Cytophagales	Hymenobacteraceae	Pontibacter	Pontibacter russatus
1	root	cellular organisms	Bacteria	Proteobacteria	Betaproteobacteria	Burkholderiales	Comamonadaceae	Limnohabitans	unclassified Limnohabitans	Limnohabitans sp. 2KL-1
1	root	cellular organisms	Eukaryota	Metamonada	Parabasalia	Trichomonadida	Trichomonadidae	Trichomonas	Trichomonas vaginalis	Trichomonas vaginalis G3
1	root	cellular organisms	Bacteria	Proteobacteria	Gammaproteobacteria	unclassified Gammaproteobacteria	Gammaproteobacteria bacterium CG22_combo_CG10-13_8_21_14_all_40_8
1	root	cellular organisms	Bacteria	Proteobacteria	Gammaproteobacteria	Enterobacterales	Enterobacteriaceae	Citrobacter	Citrobacter freundii complex	Citrobacter braakii
1	root	cellular organisms	Bacteria	Terrabacteria group	Firmicutes	Bacilli	Bacillales	Bacillaceae	Bacillus	unclassified Bacillus (in: Bacteria)	Bacillus sp. YIM B00319
1	root	cellular organisms	Bacteria	Terrabacteria group	Firmicutes	Bacilli	Bacillales	Staphylococcaceae	Staphylococcus	unclassified Staphylococcus
1	root	cellular organisms	Eukaryota	Opisthokonta	Fungi	Dikarya	Ascomycota	saccharomyceta	Pezizomycotina	leotiomyceta	sordariomyceta	Sordariomycetes	Hypocreomycetidae	Hypocreales	Nectriaceae	Fusarium	Fusarium decemcellulare species complex	Fusarium decemcellulare
2	root	cellular organisms	Bacteria	Proteobacteria	Alphaproteobacteria	Hyphomicrobiales	Phyllobacteriaceae	Mesorhizobium	unclassified Mesorhizobium	Mesorhizobium sp. WSM2561
1	root	cellular organisms	Bacteria	Terrabacteria group	Actinobacteria	Actinomycetia	Streptomycetales	Streptomycetaceae	Streptomyces	unclassified Streptomyces	Streptomyces sp. S07_1.15
1	root	cellular organisms	Bacteria	Terrabacteria group	Firmicutes	unclassified Firmicutes sensu stricto	Firmicutes bacterium ADurb.Bin456
1	root	cellular organisms	Eukaryota	Opisthokonta	Fungi	Dikarya	Ascomycota	saccharomyceta	Pezizomycotina	Pezizomycetes	Pezizales	Tuberaceae	Tuber	Tuber borchii
1	root	cellular organisms	Bacteria	Proteobacteria	delta/epsilon subdivisions	Deltaproteobacteria	unclassified Deltaproteobacteria	Deltaproteobacteria bacterium HGW-Deltaproteobacteria-20
2	root	cellular organisms	Bacteria	Proteobacteria	Alphaproteobacteria	Hyphomicrobiales	Rhizobiaceae	Sinorhizobium/Ensifer group	Ensifer	Ensifer adhaerens
1	root	Viruses	Duplodnaviria	Heunggongvirae	Uroviricota	Caudoviricetes	Caudovirales	Podoviridae	unclassified Podoviridae	Ralstonia phage DU_RP_II
1	root	cellular organisms	Bacteria	Proteobacteria	Gammaproteobacteria	Oceanospirillales	Alcanivoracaceae	Alcanivorax	Alcanivorax nanhaiticus
1	root	cellular organisms	Bacteria	FCB group	Bacteroidetes/Chlorobi group	Bacteroidetes	Sphingobacteriia	Sphingobacteriales	Sphingobacteriaceae	Pedobacter	Pedobacter arcticus
1	root	cellular organisms	Bacteria	Proteobacteria	Alphaproteobacteria	Hyphomicrobiales	Rhizobiaceae	Rhizobium/Agrobacterium group	Agrobacterium	Agrobacterium tumefaciens complex	Agrobacterium fabrum
2	root	cellular organisms	Bacteria	Terrabacteria group	Cyanobacteria/Melainabacteria group	Cyanobacteria	Chroococcidiopsidales	Chroococcidiopsidaceae	Chroococcidiopsis	unclassified Chroococcidiopsis	Chroococcidiopsis sp. CCALA 051
1	root	cellular organisms	Eukaryota	Opisthokonta	Fungi	Dikarya	Ascomycota	saccharomyceta	Pezizomycotina	leotiomyceta	Eurotiomycetes	Chaetothyriomycetidae	Chaetothyriales	Herpotrichiellaceae	Exophiala	Exophiala xenobiotica
1	root	cellular organisms	Bacteria	Proteobacteria	Alphaproteobacteria	Hyphomicrobiales	Rhizobiaceae	Rhizobium/Agrobacterium group	Agrobacterium	Agrobacterium tumefaciens complex	Agrobacterium genomosp. 2	Agrobacterium genomosp. 2 str. CFBP 5494
1	root	cellular organisms	Bacteria	Proteobacteria	Gammaproteobacteria	Pseudomonadales	Pseudomonadaceae	Pseudomonas	unclassified Pseudomonas	Pseudomonas sp. SH10-3B
1	root	cellular organisms	Bacteria	Proteobacteria	Gammaproteobacteria	Enterobacterales	Enterobacteriaceae	Enterobacteriaceae incertae sedis	ant, tsetse, mealybug, aphid, etc. endosymbionts
1	root	cellular organisms	Bacteria	Terrabacteria group	Actinobacteria	Actinomycetia	Micromonosporales	Micromonosporaceae	Micromonospora	Micromonospora sagamiensis
1	root	cellular organisms	Bacteria	PVC group	Verrucomicrobia	Verrucomicrobiae	Verrucomicrobiales	Verrucomicrobia subdivision 3	Pedosphaera	Pedosphaera parvula	Pedosphaera parvula Ellin514
1	root	cellular organisms	Bacteria	Terrabacteria group	Actinobacteria	Coriobacteriia	Eggerthellales	Eggerthellaceae	Slackia	Slackia exigua
1	root	cellular organisms	Bacteria	Proteobacteria	delta/epsilon subdivisions	Deltaproteobacteria	Syntrophobacterales	Syntrophobacteraceae	Desulfoglaeba	Desulfoglaeba alkanexedens	Desulfoglaeba alkanexedens ALDC
2	root	cellular organisms	Bacteria	Terrabacteria group	Firmicutes	Firmicutes sensu stricto incertae sedis	Ndongobacter	Ndongobacter massiliensis
1	root	cellular organisms	Bacteria	Terrabacteria group	Firmicutes	Clostridia	Eubacteriales	Lachnospiraceae	Lachnoclostridium	unclassified Lachnoclostridium	Lachnoclostridium sp. An14
1	root	cellular organisms	Bacteria	Terrabacteria group	Firmicutes	Clostridia	Eubacteriales	Clostridiaceae	Alkaliphilus	Alkaliphilus serpentinus
1	root	cellular organisms	Bacteria	Proteobacteria	Oligoflexia	Bacteriovoracales	Halobacteriovoraceae	Halobacteriovorax	unclassified Halobacteriovorax	Halobacteriovorax sp. JY17
1	root	cellular organisms	Bacteria	Proteobacteria	Gammaproteobacteria	Oceanospirillales	Halomonadaceae	Halomonas	Halomonas elongata
1	root	cellular organisms	Eukaryota	Opisthokonta	Fungi	Dikarya	Ascomycota	saccharomyceta	Pezizomycotina	leotiomyceta	dothideomyceta	Dothideomycetes	Pleosporomycetidae	Pleosporales	Pleosporineae	Phaeosphaeriaceae	Parastagonospora	Parastagonospora nodorum
1	root	cellular organisms	Bacteria	Terrabacteria group	Firmicutes	Tissierellia	Tissierellales	Tissierellaceae	Tissierella	unclassified Tissierella	Tissierella sp. P1
1	root	cellular organisms	Bacteria	FCB group	Bacteroidetes/Chlorobi group	Bacteroidetes	Bacteroidia	Bacteroidales	Tannerellaceae	Parabacteroides	unclassified Parabacteroides	Parabacteroides sp. N37
1	root	cellular organisms	Bacteria	Proteobacteria	Alphaproteobacteria	Sphingomonadales	Sphingomonadaceae	Sphingomonas	unclassified Sphingomonas	Sphingomonas sp. URHD0057
1	root	cellular organisms	Bacteria	Terrabacteria group	Firmicutes	Clostridia	Eubacteriales	Oscillospiraceae	Pseudoflavonifractor	unclassified Pseudoflavonifractor	Pseudoflavonifractor sp. An85
2	root	cellular organisms	Bacteria	Proteobacteria	Betaproteobacteria	Rhodocyclales	Rhodocyclaceae	Denitromonas
1	root	cellular organisms	Bacteria	FCB group	Bacteroidetes/Chlorobi group	Bacteroidetes	Flavobacteriia	Flavobacteriales	Crocinitomicaceae	Fluviicola	Fluviicola chungangensis
1	root	cellular organisms	Bacteria	Terrabacteria group	Firmicutes	Negativicutes	Veillonellales	Veillonellaceae	Megasphaera	Megasphaera cerevisiae
1	root	cellular organisms	Bacteria	Terrabacteria group	Firmicutes	Clostridia	Eubacteriales	Peptococcaceae	unclassified Peptococcaceae	Peptococcaceae bacterium BICA1-8
2	root	cellular organisms	Bacteria	FCB group	Bacteroidetes/Chlorobi group	Bacteroidetes	Bacteroidia	Bacteroidales	Prevotellaceae	Prevotella	environmental samples	Prevotella sp. CAG:891
1	root	cellular organisms	Bacteria	Terrabacteria group	Firmicutes	Clostridia	Eubacteriales	Oscillospiraceae	Scatolibacter	Scatolibacter rhodanostii
1	root	cellular organisms	Bacteria	Terrabacteria group	Actinobacteria	Actinomycetia	Corynebacteriales	Nocardiaceae	Nocardia	Nocardia mexicana
1	root	cellular organisms	Bacteria	Proteobacteria	Betaproteobacteria	unclassified Betaproteobacteria	Betaproteobacteria bacterium SG8_39
2	root	cellular organisms	Bacteria	Proteobacteria	Betaproteobacteria	unclassified Betaproteobacteria	Betaproteobacteria bacterium RIFCSPLOWO2_02_FULL_67_19
1	root	cellular organisms	Bacteria	Terrabacteria group	Actinobacteria	Actinomycetia	Micrococcales	Micrococcaceae	Sinomonas	unclassified Sinomonas	Sinomonas sp. R1AF57
1	root	cellular organisms	Bacteria	Bacteria incertae sedis	Bacteria candidate phyla	Patescibacteria group	Microgenomates group	Candidatus Woesebacteria	Candidatus Woesebacteria bacterium GW2011_GWA1_39_11b
1	root	cellular organisms	Bacteria	Terrabacteria group	Firmicutes	environmental samples	Firmicutes bacterium CAG:103
1	root	Viruses	Duplodnaviria	Heunggongvirae	Uroviricota	Caudoviricetes	Caudovirales	Siphoviridae	Bclasvirinae	Rosebushvirus	Mycobacterium virus Godines	Mycobacterium phage Qyrzula
1	root	cellular organisms	Bacteria	Acidobacteria	Holophagae	Acanthopleuribacterales	Acanthopleuribacteraceae	Sulfidibacter	Sulfidibacter corallicola
1	root	cellular organisms	Bacteria	Terrabacteria group	Firmicutes	Clostridia	Eubacteriales	Eubacteriales incertae sedis	Clostridiales Family XVI. Incertae Sedis	Carboxydocella
1	root	cellular organisms	Bacteria	Terrabacteria group	Actinobacteria	Actinomycetia	Micrococcales	Micrococcaceae	Micrococcus	Micrococcus luteus
1	root	cellular organisms	Bacteria	FCB group	Bacteroidetes/Chlorobi group	Bacteroidetes	Bacteroidia	Bacteroidales	Tannerellaceae	Parabacteroides	unclassified Parabacteroides	Parabacteroides sp. 52
1	root	cellular organisms	Archaea	Euryarchaeota	Stenosarchaea group	Methanomicrobia	Methanomicrobiales	Methanomicrobiaceae	Methanofollis	unclassified Methanofollis	Methanofollis sp. W23
1	root	cellular organisms	Bacteria	Proteobacteria	Alphaproteobacteria	Hyphomicrobiales	Ancalomicrobiaceae	Pinisolibacter	Pinisolibacter aquiterrae
1	root	cellular organisms	Bacteria	Proteobacteria	Alphaproteobacteria	Hyphomicrobiales	Xanthobacteraceae	Ancylobacter	unclassified Ancylobacter	Ancylobacter sp. Lp-2
1	root	cellular organisms	Bacteria	Terrabacteria group	Firmicutes	Bacilli	Bacillales	Bacillaceae	Rossellomorea	Rossellomorea marisflavi
1	root	cellular organisms	Bacteria	Proteobacteria	Gammaproteobacteria	Thiotrichales	Piscirickettsiaceae	Methylophaga
1	root	cellular organisms	Bacteria	Terrabacteria group	Firmicutes	Clostridia	Eubacteriales	Lachnospiraceae	Mediterraneibacter	Mediterraneibacter glycyrrhizinilyticus
1	root	Viruses	Duplodnaviria	Heunggongvirae	Uroviricota	Caudoviricetes	Caudovirales	Podoviridae	unclassified Podoviridae	Sinorhizobium phage PBC5
1	root	cellular organisms	Bacteria	Terrabacteria group	Actinobacteria	Actinomycetia	Propionibacteriales	Nocardioidaceae	Nocardioides	Nocardioides jensenii
2	root	cellular organisms	Bacteria	Proteobacteria	Betaproteobacteria	Burkholderiales	Burkholderiaceae	Chitinimonas	Chitinimonas taiwanensis
1	root	cellular organisms	Bacteria	Terrabacteria group	Chloroflexi	unclassified Chloroflexi	Chloroflexi bacterium RBG_13_51_18
1	root	cellular organisms	Bacteria	Proteobacteria	Betaproteobacteria	Burkholderiales	Sutterellaceae
1	root	cellular organisms	Bacteria	Terrabacteria group	Cyanobacteria/Melainabacteria group	Cyanobacteria	Pseudanabaenales	Prochlorotrichaceae	Halomicronema	Halomicronema hongdechloris
1	root	cellular organisms	Bacteria	Terrabacteria group	Actinobacteria	Actinomycetia	Streptomycetales	Streptomycetaceae	Kitasatospora	unclassified Kitasatospora	Kitasatospora sp. RB6PN24
1	root	cellular organisms	Bacteria	Proteobacteria	Alphaproteobacteria	Rhodospirillales	Acetobacteraceae	Roseomonas	Roseomonas aerophila
1	root	cellular organisms	Bacteria	FCB group	Bacteroidetes/Chlorobi group	Bacteroidetes	Flavobacteriia	Flavobacteriales	Flavobacteriaceae	Tenacibaculum	Tenacibaculum discolor
1	root	cellular organisms	Bacteria	Terrabacteria group	Firmicutes	Clostridia	Eubacteriales	Peptococcaceae	Thermincola	Thermincola ferriacetica
1	root	cellular organisms	Bacteria	Terrabacteria group	Chloroflexi	Ktedonobacteria	Ktedonobacterales	Ktedonobacteraceae	Ktedonobacter	unclassified Ktedonobacter	Ktedonobacter sp. 13_2_20CM_53_11
1	root	cellular organisms	Bacteria	FCB group	Bacteroidetes/Chlorobi group	Bacteroidetes	Bacteroidia	Bacteroidales	Bacteroidaceae	Bacteroides	environmental samples	Bacteroides sp. CAG:633
1	root	cellular organisms	Bacteria	Terrabacteria group	Firmicutes	Bacilli	Bacillales	Paenibacillaceae	Paenibacillus	unclassified Paenibacillus	Paenibacillus sp. EPM92
1	root	cellular organisms	Bacteria	Terrabacteria group	Tenericutes	Mollicutes	Mycoplasmatales	Mycoplasmataceae	Mycoplasma	Mycoplasma putrefaciens
1	root	cellular organisms	Bacteria	Proteobacteria	Gammaproteobacteria	Xanthomonadales	Xanthomonadaceae	Pseudoxanthomonas	Pseudoxanthomonas daejeonensis
2	root	cellular organisms	Bacteria	FCB group	Candidatus Cloacimonetes	unclassified Candidatus Cloacimonetes	Candidatus Cloacimonetes bacterium
1	root	cellular organisms	Bacteria	Proteobacteria	delta/epsilon subdivisions	Deltaproteobacteria	Bradymonadales	Bradymonadaceae	Lujinxingia	Lujinxingia litoralis
1	root	Viruses	Duplodnaviria	Heunggongvirae	Uroviricota	Caudoviricetes	Caudovirales	Autographiviridae	Studiervirinae	Kayfunavirus	unclassified Kayfunavirus	Escherichia phage Pisces
1	root	Viruses	Duplodnaviria	Heunggongvirae	Uroviricota	Caudoviricetes	Caudovirales	Schitoviridae	Cbunavirus
1	root	cellular organisms	Bacteria	Terrabacteria group	Firmicutes	Clostridia	Eubacteriales	Clostridiaceae	Caminicella	Caminicella sporogenes
2	root	cellular organisms	Bacteria	Proteobacteria	delta/epsilon subdivisions	Deltaproteobacteria	Desulfovibrionales	Desulfovibrionaceae	Desulfovibrio	unclassified Desulfovibrio	Desulfovibrio sp. X2
1	root	cellular organisms	Bacteria	Proteobacteria	Gammaproteobacteria	Aeromonadales	Succinivibrionaceae
1	root	cellular organisms	Bacteria	Proteobacteria	Gammaproteobacteria	Thiotrichales	Thiotrichaceae	Thiothrix	Thiothrix nivea
1	root	cellular organisms	Bacteria	Proteobacteria	delta/epsilon subdivisions	Deltaproteobacteria	Syntrophales	Syntrophaceae	Smithella	unclassified Smithella
1	root	cellular organisms	Bacteria	Spirochaetes	Spirochaetia	Spirochaetales	Treponemataceae	Treponema	Treponema brennaborense
1	root	cellular organisms	Bacteria	Proteobacteria	Oligoflexia	Bdellovibrionales	unclassified Bdellovibrionales	Bdellovibrionales bacterium RIFOXYD1_FULL_53_11
1	root	cellular organisms	Bacteria	Terrabacteria group	Actinobacteria	Nitriliruptoria	Euzebyales	Euzebyaceae	Euzebya	Euzebya rosea
1	root	cellular organisms	Bacteria	Proteobacteria	Betaproteobacteria	Burkholderiales	Burkholderiaceae	Paraburkholderia	unclassified Paraburkholderia	Paraburkholderia sp. BCC1886
1	root	cellular organisms	Bacteria	Terrabacteria group	Actinobacteria	Actinomycetia	Streptomycetales	Streptomycetaceae	Streptomyces	Streptomyces hoynatensis
1	root	cellular organisms	Bacteria	Terrabacteria group	Firmicutes	Clostridia	Eubacteriales	Peptostreptococcaceae	Peptostreptococcaceae incertae sedis	[Clostridium] paradoxum	[Clostridium] paradoxum JW-YL-7 = DSM 7308
1	root	cellular organisms	Bacteria	Terrabacteria group	Firmicutes	Bacilli	Bacillales	Bacillaceae	Bacillus	Bacillus glycinifermentans
1	root	cellular organisms	Bacteria	Proteobacteria	Betaproteobacteria	Burkholderiales	Comamonadaceae	Delftia	Delftia tsuruhatensis
1	root	cellular organisms	Bacteria	Terrabacteria group	Deinococcus-Thermus	Deinococci	Deinococcales	Deinococcaceae	Deinococcus	Deinococcus planocerae
1	root	cellular organisms	Bacteria	FCB group	Bacteroidetes/Chlorobi group	Bacteroidetes	Sphingobacteriia	Sphingobacteriales	Sphingobacteriaceae	Arcticibacter	Arcticibacter pallidicorallinus
1	root	cellular organisms	Bacteria	FCB group	Bacteroidetes/Chlorobi group	Bacteroidetes	Flavobacteriia	Flavobacteriales	Flavobacteriaceae	Capnocytophaga	Capnocytophaga cynodegmi
1	root	cellular organisms	Bacteria	Proteobacteria	Betaproteobacteria	Burkholderiales	Burkholderiaceae	Paraburkholderia	Paraburkholderia panacisoli
1	root	cellular organisms	Bacteria	Proteobacteria	Gammaproteobacteria	Oceanospirillales	Oceanospirillaceae	Marinobacterium	Marinobacterium jannaschii
1	root	cellular organisms	Bacteria	Terrabacteria group	Firmicutes	Bacilli	Bacillales	Paenibacillaceae	Aneurinibacillus group	Ammoniphilus	unclassified Ammoniphilus	Ammoniphilus sp. YIM 78166
1	root	cellular organisms	Bacteria	Proteobacteria	Alphaproteobacteria	Rhodobacterales	Roseobacteraceae	Roseovarius	unclassified Roseovarius	Roseovarius sp. PS-C2
1	root	cellular organisms	Bacteria	Proteobacteria	Alphaproteobacteria	Sphingomonadales	Sphingomonadaceae	Sphingomonas	Sphingomonas aracearum
1	root	cellular organisms	Bacteria	Proteobacteria	Alphaproteobacteria	Hyphomicrobiales	Aurantimonadaceae	Aureimonas	Aureimonas leprariae
1	root	cellular organisms	Bacteria	FCB group	Bacteroidetes/Chlorobi group	Bacteroidetes	Flavobacteriia	Flavobacteriales	Weeksellaceae	Chryseobacterium group	Chryseobacterium	unclassified Chryseobacterium	Chryseobacterium sp. 2VB
1	root	cellular organisms	Bacteria	Proteobacteria	Betaproteobacteria	Burkholderiales	Comamonadaceae	Limnohabitans	Limnohabitans parvus
1	root	cellular organisms	Bacteria	Proteobacteria	Alphaproteobacteria	Rhodospirillales	Acetobacteraceae	Roseomonas	Roseomonas oleicola
1	root	cellular organisms	Bacteria	Proteobacteria	Alphaproteobacteria	Rhodobacterales	Roseobacteraceae	Aliiruegeria
1	root	cellular organisms	Bacteria	Proteobacteria	Betaproteobacteria	Burkholderiales	Alcaligenaceae	Pusillimonas (ex Stolz et al. 2005)	unclassified Pusillimonas	Pusillimonas sp. ANT_WB101
1	root	cellular organisms	Bacteria	Proteobacteria	Alphaproteobacteria	Hyphomicrobiales	Phyllobacteriaceae	Mesorhizobium	unclassified Mesorhizobium	Mesorhizobium sp. B2-8-9
1	root	cellular organisms	Bacteria	Proteobacteria	Alphaproteobacteria	Hyphomicrobiales	Methylobacteriaceae	Methylobacterium	unclassified Methylobacterium	Methylobacterium sp. WL19
2	root	cellular organisms	Bacteria	Proteobacteria	delta/epsilon subdivisions	Deltaproteobacteria	Syntrophales	Syntrophaceae	Smithella	unclassified Smithella	Smithella sp. SCADC
1	root	cellular organisms	Bacteria	Proteobacteria	Betaproteobacteria	Burkholderiales	Burkholderiaceae	Chitinimonas	unclassified Chitinimonas	Chitinimonas sp. BJB300
1	root	cellular organisms	Bacteria	Proteobacteria	Alphaproteobacteria	Sphingomonadales	Sphingosinicellaceae	unclassified Sphingosinicellaceae	Sphingosinicellaceae bacterium
1	root	cellular organisms	Bacteria	Proteobacteria	Gammaproteobacteria	Oceanospirillales	Oceanospirillaceae	Nitrincola	Nitrincola nitratireducens
1	root	cellular organisms	Bacteria	Proteobacteria	Alphaproteobacteria	Rhodobacterales	Rhodobacteraceae	Marinosulfonomonas	unclassified Marinosulfonomonas	Marinosulfonomonas sp.
1	root	cellular organisms	Bacteria	Proteobacteria	Alphaproteobacteria	Hyphomicrobiales	Methylobacteriaceae	Methylobacterium	unclassified Methylobacterium	Methylobacterium sp. WSM2598
1	root	cellular organisms	Bacteria	FCB group	Bacteroidetes/Chlorobi group	Bacteroidetes	Flavobacteriia	Flavobacteriales	Flavobacteriaceae	Aequorivita	Aequorivita viscosa
1	root	cellular organisms	Bacteria	Terrabacteria group	Actinobacteria	Actinomycetia	unclassified Actinomycetia	Actinobacteria bacterium OK074
2	root	cellular organisms	Bacteria	Terrabacteria group	Firmicutes	Clostridia	Thermoanaerobacterales	Thermoanaerobacterales Family III. Incertae Sedis	Thermoanaerobacterium
1	root	cellular organisms	Bacteria	Terrabacteria group	Firmicutes	Bacilli	Bacillales	Bacillaceae	Pontibacillus	Pontibacillus litoralis
1	root	cellular organisms	Bacteria	Proteobacteria	Gammaproteobacteria	Pasteurellales	Pasteurellaceae	Haemophilus	Haemophilus pittmaniae
1	root	cellular organisms	Bacteria	Proteobacteria	Alphaproteobacteria	Hyphomicrobiales	Methylobacteriaceae	Methylobacterium	Methylobacterium organophilum
1	root	cellular organisms	Bacteria	Terrabacteria group	Cyanobacteria/Melainabacteria group	Cyanobacteria	Oscillatoriophycideae	Oscillatoriales	Microcoleaceae	Kamptonema
1	root	cellular organisms	Bacteria	FCB group	Bacteroidetes/Chlorobi group	Bacteroidetes	Flavobacteriia	Flavobacteriales	Weeksellaceae	Chryseobacterium group	Chryseobacterium	unclassified Chryseobacterium	Chryseobacterium sp. Tr-659
1	root	cellular organisms	Bacteria	Proteobacteria	Alphaproteobacteria	Hyphomicrobiales	Hyphomicrobiaceae	Limoniibacter	Limoniibacter endophyticus
2	root	cellular organisms	Bacteria	Proteobacteria	Alphaproteobacteria	Hyphomicrobiales	Aurantimonadaceae	Martelella	Martelella mediterranea
1	root	cellular organisms	Bacteria	Proteobacteria	Gammaproteobacteria	Pseudomonadales	Pseudomonadaceae	Pseudomonas	unclassified Pseudomonas	Pseudomonas sp. Irchel s3h17
1	root	cellular organisms	Bacteria	Proteobacteria	Gammaproteobacteria	Enterobacterales	Enterobacteriaceae	Kosakonia
1	root	cellular organisms	Bacteria	Terrabacteria group	Actinobacteria	Actinomycetia	Micrococcales	Promicromonosporaceae	Xylanibacterium	Xylanibacterium ulmi
1	root	cellular organisms	Bacteria	Proteobacteria	Alphaproteobacteria	Hyphomicrobiales	Rhizobiaceae	Rhizobium/Agrobacterium group	Rhizobium	unclassified Rhizobium	Rhizobium sp. BK456
1	root	cellular organisms	Bacteria	Proteobacteria	Gammaproteobacteria	Kangiellales	Kangiellaceae	Kangiella	Kangiella koreensis
1	root	cellular organisms	Bacteria	Acidobacteria	Blastocatellia	Chloracidobacterium	Chloracidobacterium thermophilum
1	root	cellular organisms	Bacteria	Proteobacteria	Alphaproteobacteria	Rhodobacterales	Rhodobacteraceae	Cereibacter	Cereibacter sphaeroides	Cereibacter sphaeroides WS8N
1	root	cellular organisms	Bacteria	Proteobacteria	delta/epsilon subdivisions	Deltaproteobacteria	Desulfovibrionales	Desulfovibrionaceae	Desulfovibrio	Desulfovibrio brasiliensis
1	root	cellular organisms	Bacteria	Proteobacteria	Alphaproteobacteria	Hyphomicrobiales	Xanthobacteraceae	Xanthobacter	Xanthobacter dioxanivorans
1	root	cellular organisms	Bacteria	Terrabacteria group	Actinobacteria	Actinomycetia	Corynebacteriales	Nocardiaceae	Rhodococcus	Rhodococcus opacus
1	root	cellular organisms	Bacteria	Terrabacteria group	Firmicutes	Clostridia	Eubacteriales	Lachnospiraceae	Cellulosilyticum
1	root	cellular organisms	Bacteria	Terrabacteria group	Actinobacteria	Actinomycetia	Pseudonocardiales	Pseudonocardiaceae	Pseudonocardia	unclassified Pseudonocardia
2	root	cellular organisms	Bacteria	FCB group	Bacteroidetes/Chlorobi group	Bacteroidetes	unclassified Bacteroidetes	Bacteroidetes bacterium ADurb.Bin035
1	root	cellular organisms	Bacteria	Terrabacteria group	Firmicutes	Clostridia	Eubacteriales	Thermohalobacteraceae	Thermohalobacter	Thermohalobacter berrensis
1	root	cellular organisms	Bacteria	Proteobacteria	Alphaproteobacteria	unclassified Alphaproteobacteria	Alphaproteobacteria bacterium HGW-Alphaproteobacteria-10
1	root	cellular organisms	Bacteria	Spirochaetes	Spirochaetia	Spirochaetales	Spirochaetaceae	Sediminispirochaeta	Sediminispirochaeta bajacaliforniensis
1	root	cellular organisms	Bacteria	Terrabacteria group	Actinobacteria	Actinomycetia	Micromonosporales	Micromonosporaceae	Micromonospora	unclassified Micromonospora	Micromonospora sp. NBRC 107566
1	root	cellular organisms	Bacteria	FCB group	Bacteroidetes/Chlorobi group	Bacteroidetes	Flavobacteriia	Flavobacteriales	Flavobacteriaceae	Psychroflexus	Psychroflexus torquis
1	root	cellular organisms	Archaea	Euryarchaeota	Stenosarchaea group	Methanomicrobia	Methanotrichales	Methanotrichaceae	Methanothrix	unclassified Methanothrix	Methanosaeta sp. PtaB.Bin039
1	root	cellular organisms	Bacteria	Proteobacteria	Alphaproteobacteria	Rhodobacterales	Rhodobacteraceae	Aliiroseovarius	Aliiroseovarius sediminilitoris
1	root	cellular organisms	Bacteria	FCB group	Bacteroidetes/Chlorobi group	Bacteroidetes	Chitinophagia	Chitinophagales	Chitinophagaceae	Pseudoflavitalea	Pseudoflavitalea rhizosphaerae
1	root	Viruses	Duplodnaviria	Heunggongvirae	Uroviricota	Caudoviricetes	Caudovirales	Myoviridae	unclassified Myoviridae	Synechococcus phage ACG-2014e
1	root	cellular organisms	Bacteria	FCB group	Bacteroidetes/Chlorobi group	Bacteroidetes	Flavobacteriia	Flavobacteriales	Flavobacteriaceae	Flavobacterium	Flavobacterium succinicans
1	root	cellular organisms	Bacteria	Proteobacteria	Betaproteobacteria	Nitrosomonadales	Nitrosomonadaceae	Nitrosomonas	Nitrosomonas communis
1	root	cellular organisms	Bacteria	Proteobacteria	Gammaproteobacteria	Oceanospirillales	Halomonadaceae	Kushneria	Kushneria phyllosphaerae
1	root	cellular organisms	Bacteria	FCB group	Bacteroidetes/Chlorobi group	Bacteroidetes	Chitinophagia	Chitinophagales	Chitinophagaceae	Taibaiella	Taibaiella koreensis
1	root	cellular organisms	Bacteria	Terrabacteria group	Actinobacteria	unclassified Actinobacteria	Actinobacteria bacterium RBG_16_64_13
1	root	cellular organisms	Eukaryota	Opisthokonta	Fungi	Dikarya	Basidiomycota	Agaricomycotina	Agaricomycetes	Agaricomycetidae	Boletales	Paxilineae	Paxillaceae	Hydnomerulius	Hydnomerulius pinastri	Hydnomerulius pinastri MD-312
1	root	cellular organisms	Bacteria	FCB group	Bacteroidetes/Chlorobi group	Bacteroidetes	Chitinophagia	Chitinophagales	Chitinophagaceae	Pseudobacter	Pseudobacter ginsenosidimutans
1	root	cellular organisms	Bacteria	Proteobacteria	Alphaproteobacteria	Hyphomicrobiales	Rhizobiaceae	Sinorhizobium/Ensifer group	Ensifer	unclassified Ensifer	Ensifer sp. HO-A22
1	root	cellular organisms	Bacteria	Proteobacteria	Gammaproteobacteria	Pseudomonadales	Pseudomonadaceae	Pseudomonas	Pseudomonas bananamidigenes
1	root	cellular organisms	Bacteria	Proteobacteria	Betaproteobacteria	Neisseriales	Neisseriaceae	Kingella	unclassified Kingella (in: Bacteria)	Kingella sp.
1	root	cellular organisms	Bacteria	Bacteria incertae sedis	Bacteria candidate phyla	Patescibacteria group	Parcubacteria group	Candidatus Yanofskybacteria
1	root	cellular organisms	Bacteria	Nitrospirae	unclassified Nitrospirae	Nitrospirae bacterium GWD2_57_9
1	root	cellular organisms	Bacteria	Terrabacteria group	Actinobacteria	Actinomycetia	Pseudonocardiales	Pseudonocardiaceae	Amycolatopsis	Amycolatopsis aidingensis
1	root	cellular organisms	Bacteria	Terrabacteria group	Firmicutes	Bacilli	Bacillales	Paenibacillaceae	Paenibacillus	Paenibacillus tuaregi
1	root	cellular organisms	Bacteria	FCB group	Gemmatimonadetes	environmental samples	uncultured Gemmatimonadetes bacterium
1	root	cellular organisms	Bacteria	Proteobacteria	Gammaproteobacteria	Cellvibrionales	unclassified Cellvibrionales	Cellvibrionales bacterium TMED157
2	root	cellular organisms	Bacteria	Proteobacteria	Alphaproteobacteria	Hyphomicrobiales	Rhodobiaceae	unclassified Rhodobiaceae	Rhodobiaceae bacterium
1	root	cellular organisms	Bacteria	Bacteria incertae sedis	Bacteria candidate phyla	Patescibacteria group	Parcubacteria group	Candidatus Kuenenbacteria
1	root	cellular organisms	Bacteria	Terrabacteria group	Chloroflexi	unclassified Chloroflexi	Chloroflexi bacterium 13_1_40CM_4_68_4
1	root	cellular organisms	Bacteria	Proteobacteria	Alphaproteobacteria	Caulobacterales	Caulobacteraceae	Asticcacaulis	unclassified Asticcacaulis	Asticcacaulis sp. 32-58-5
1	root	cellular organisms	Bacteria	Proteobacteria	Alphaproteobacteria	Rhodobacterales	Roseobacteraceae	Thalassobius	Thalassobius gelatinovorus
2	root	cellular organisms	Bacteria	Proteobacteria	Gammaproteobacteria	Xanthomonadales	Rhodanobacteraceae	Pseudofulvimonas	Pseudofulvimonas gallinarii
1	root	cellular organisms	Bacteria	FCB group	Gemmatimonadetes	Gemmatimonadetes	Gemmatimonadales	Gemmatimonadaceae	Gemmatimonas	unclassified Gemmatimonas	Gemmatimonas sp. SM23_52
2	root	cellular organisms	Bacteria	Terrabacteria group	Firmicutes	Clostridia	Eubacteriales	Syntrophomonadaceae	Candidatus Syntrophonatronum	Candidatus Syntrophonatronum acetioxidans
1	root	cellular organisms	Archaea	Asgard group	Candidatus Heimdallarchaeota	Candidatus Heimdallarchaeota archaeon PR6
1	root	cellular organisms	Bacteria	Proteobacteria	delta/epsilon subdivisions	Deltaproteobacteria	Desulfuromonadales	Geobacteraceae	Geomonas	Geomonas subterranea
1	root	cellular organisms	Bacteria	Terrabacteria group	Cyanobacteria/Melainabacteria group	Cyanobacteria	Pseudanabaenales	Prochlorotrichaceae	Nodosilinea	unclassified Nodosilinea	Nodosilinea sp. LEGE 07088
1	root	cellular organisms	Bacteria	Thermodesulfobacteria	Thermodesulfobacteria	Thermodesulfobacteriales	Thermodesulfobacteriaceae	Thermodesulfatator	Thermodesulfatator indicus
1	root	cellular organisms	Bacteria	Terrabacteria group	Actinobacteria	Actinomycetia	Streptosporangiales	Thermomonosporaceae	Actinomadura	Actinomadura viridis
1	root	cellular organisms	Bacteria	Proteobacteria	Alphaproteobacteria	Rhodobacterales	Roseobacteraceae	Maritimibacter	Maritimibacter harenae
1	root	cellular organisms	Bacteria	Terrabacteria group	Actinobacteria	Actinomycetia	Propionibacteriales	Propionibacteriaceae	Tessaracoccus	unclassified Tessaracoccus	Tessaracoccus sp. MC1679
1	root	Viruses	Duplodnaviria	Heunggongvirae	Uroviricota	Caudoviricetes	Caudovirales	Siphoviridae	Deejayvirinae	Kenoshavirus
1	root	cellular organisms	Bacteria	Terrabacteria group	Firmicutes	Clostridia	Thermoanaerobacterales	Thermoanaerobacteraceae	Moorella group	Moorella	Moorella thermoacetica
1	root	cellular organisms	Bacteria	Terrabacteria group	Firmicutes	Bacilli	Bacillales	Planococcaceae	Solibacillus	unclassified Solibacillus	Solibacillus sp. MA9
1	root	cellular organisms	Bacteria	Terrabacteria group	Firmicutes	Bacilli	Bacillales	Paenibacillaceae	Paenibacillus	unclassified Paenibacillus	Paenibacillus sp. HB172176
1	root	cellular organisms	Bacteria	Terrabacteria group	Firmicutes	Bacilli	Bacillales	Listeriaceae	Brochothrix	Brochothrix campestris
1	root	cellular organisms	Bacteria	Proteobacteria	Betaproteobacteria	Burkholderiales	Comamonadaceae	Pseudorhodoferax	Pseudorhodoferax soli
2	root	cellular organisms	Bacteria	PVC group	Verrucomicrobia	unclassified Verrucomicrobia	Verrucomicrobia bacterium LW23
1	root	Viruses	Duplodnaviria	Heunggongvirae	Uroviricota	Caudoviricetes	Caudovirales	Siphoviridae	Pamexvirus	Pseudomonas virus PaMx28	Pseudomonas phage PaMx28
3	root	cellular organisms	Bacteria	Proteobacteria	Betaproteobacteria	Burkholderiales	Alcaligenaceae	Pusillimonas (ex Stolz et al. 2005)	unclassified Pusillimonas
1	root	cellular organisms	Bacteria	Proteobacteria	unclassified Proteobacteria	Proteobacteria bacterium SG_bin4
1	root	cellular organisms	Bacteria	Proteobacteria	Alphaproteobacteria	Sphingomonadales	Sphingosinicellaceae	Glacieibacterium	Glacieibacterium frigidum
1	root	cellular organisms	Bacteria	Proteobacteria	Gammaproteobacteria	Xanthomonadales	Xanthomonadaceae	Lysobacter	Lysobacter soli
1	root	cellular organisms	Bacteria	Proteobacteria	delta/epsilon subdivisions	Epsilonproteobacteria	Campylobacterales	Arcobacteraceae	Aliarcobacter	Aliarcobacter faecis
2	root	cellular organisms	Bacteria	Proteobacteria	Alphaproteobacteria	Rhodospirillales	Acetobacteraceae	Siccirubricoccus	unclassified Siccirubricoccus	Siccirubricoccus sp. G192
1	root	cellular organisms	Bacteria	Proteobacteria	Betaproteobacteria	Rhodocyclales	Zoogloeaceae	Azoarcus	unclassified Azoarcus	Azoarcus sp. PA01
1	root	cellular organisms	Bacteria	PVC group	Planctomycetes	Planctomycetia	Planctomycetales	unclassified Planctomycetales	Planctomycetales bacterium 10988
1	root	cellular organisms	Bacteria	FCB group	Bacteroidetes/Chlorobi group	Bacteroidetes	Sphingobacteriia	Sphingobacteriales	Sphingobacteriaceae	Mucilaginibacter	Mucilaginibacter boryungensis
1	root	cellular organisms	Bacteria	Terrabacteria group	Firmicutes	Bacilli	Bacillales	Bacillaceae	Calidifontibacillus/Schinkia group	Schinkia	Schinkia azotoformans
1	root	cellular organisms	Bacteria	Proteobacteria	Gammaproteobacteria	Vibrionales	Vibrionaceae	Vibrio	Vibrio splendidus
1	root	cellular organisms	Bacteria	FCB group	Bacteroidetes/Chlorobi group	Bacteroidetes	Cytophagia	Cytophagales	Flammeovirgaceae	unclassified Flammeovirgaceae	Flammeovirgaceae bacterium TMED32
1	root	cellular organisms	Bacteria	Proteobacteria	Alphaproteobacteria	Rhodobacterales	Roseobacteraceae	Jannaschia	Jannaschia helgolandensis
1	root	cellular organisms	Bacteria	Proteobacteria	Alphaproteobacteria	Rhodobacterales	Rhodobacteraceae	Paracoccus	unclassified Paracoccus (in: Bacteria)	Paracoccus sp. J39
1	root	cellular organisms	Bacteria	Terrabacteria group	Actinobacteria	Actinomycetia	Streptomycetales	Streptomycetaceae	Streptomyces	Streptomyces spectabilis
1	root	cellular organisms	Bacteria	Terrabacteria group	Cyanobacteria/Melainabacteria group	Cyanobacteria	Nostocales	Rivulariaceae	Rivularia	unclassified Rivularia (in: Bacteria)	Rivularia sp. IAM M-261
1	root	Viruses	Duplodnaviria	Heunggongvirae	Uroviricota	Caudoviricetes	Caudovirales	Siphoviridae	Helsingorvirus	Cellulophaga virus Cba181	Cellulophaga phage phi18:1
1	root	cellular organisms	Bacteria	FCB group	Bacteroidetes/Chlorobi group	Bacteroidetes	Flavobacteriia	Flavobacteriales	Flavobacteriaceae	Flavicella	Flavicella marina
1	root	cellular organisms	Bacteria	FCB group	Bacteroidetes/Chlorobi group	Bacteroidetes	Sphingobacteriia	Sphingobacteriales	Sphingobacteriaceae	Sphingobacterium	unclassified Sphingobacterium	Sphingobacterium sp. SRCM116780
1	root	cellular organisms	Bacteria	Terrabacteria group	Firmicutes	Clostridia	Eubacteriales	Oscillospiraceae	Oscillibacter	Oscillibacter valericigenes
1	root	cellular organisms	Bacteria	Proteobacteria	Gammaproteobacteria	Pseudomonadales	Pseudomonadaceae	Pseudomonas	unclassified Pseudomonas	Pseudomonas sp. WS 5011
1	root	cellular organisms	Bacteria	Proteobacteria	Alphaproteobacteria	Sphingomonadales	Sphingomonadaceae	Sphingopyxis	unclassified Sphingopyxis	Sphingopyxis sp. C-1
1	root	cellular organisms	Bacteria	Acidobacteria
1	root	cellular organisms	Bacteria	Proteobacteria	Alphaproteobacteria	unclassified Alphaproteobacteria	Alphaproteobacteria bacterium SO-S41
1	root	cellular organisms	Bacteria	FCB group	Bacteroidetes/Chlorobi group	Bacteroidetes	Flavobacteriia	Flavobacteriales	Crocinitomicaceae	Brumimicrobium	Brumimicrobium mesophilum
1	root	cellular organisms	Bacteria	Proteobacteria	Alphaproteobacteria	Hyphomicrobiales	Phyllobacteriaceae	Mesorhizobium	Mesorhizobium neociceri
1	root	cellular organisms	Bacteria	Terrabacteria group	Actinobacteria	Actinomycetia	Micrococcales	Micrococcaceae	Arthrobacter	unclassified Arthrobacter
2	root	cellular organisms	Bacteria	FCB group	Bacteroidetes/Chlorobi group	Bacteroidetes	unclassified Bacteroidetes	Bacteroidetes bacterium GWF2_38_335
1	root	cellular organisms	Bacteria	Terrabacteria group	Actinobacteria	Actinomycetia	Corynebacteriales	Corynebacteriaceae	Corynebacterium	Corynebacterium glucuronolyticum
2	root	cellular organisms	Bacteria	Terrabacteria group	Firmicutes	Bacilli	Lactobacillales	Lactobacillaceae	Lactobacillus	Lactobacillus crispatus
1	root	cellular organisms	Bacteria	Proteobacteria	Alphaproteobacteria	Rhodospirillales	Kiloniellaceae	Curvivirga	Curvivirga aplysinae
1	root	cellular organisms	Bacteria	Proteobacteria	Gammaproteobacteria	Oceanospirillales	Oceanospirillaceae	Marinomonas	Marinomonas ushuaiensis
1	root	cellular organisms	Bacteria	Proteobacteria	Gammaproteobacteria	Moraxellales	Moraxellaceae	Acinetobacter	unclassified Acinetobacter	Acinetobacter sp. WCHAc010052
1	root	cellular organisms	Bacteria	Proteobacteria	Gammaproteobacteria	Oceanospirillales	Alcanivoracaceae	Alcanivorax	Alcanivorax profundimaris
1	root	cellular organisms	Bacteria	Proteobacteria	Alphaproteobacteria	Rhodobacterales	Rhodobacteraceae	Yoonia	Yoonia vestfoldensis
1	root	cellular organisms	Bacteria	Proteobacteria	Gammaproteobacteria	Enterobacterales	Enterobacteriaceae	Klebsiella/Raoultella group
1	root	cellular organisms	Bacteria	Proteobacteria	delta/epsilon subdivisions	Deltaproteobacteria	unclassified Deltaproteobacteria	Deltaproteobacteria bacterium RBG_16_64_85
1	root	cellular organisms	Bacteria	Terrabacteria group	Firmicutes	Clostridia	Eubacteriales	Lachnospiraceae	Butyrivibrio
1	root	cellular organisms	Bacteria	Terrabacteria group	Armatimonadetes	Fimbriimonadia	Fimbriimonadales	Fimbriimonadaceae	Fimbriimonas	Fimbriimonas ginsengisoli
1	root	cellular organisms	Bacteria	Proteobacteria	Alphaproteobacteria	Hyphomicrobiales	Devosiaceae	Devosia	Devosia enhydra
1	root	cellular organisms	Bacteria	PVC group	Planctomycetes	Planctomycetia	Planctomycetales	Planctomycetaceae	Caulifigura	Caulifigura coniformis
1	root	cellular organisms	Archaea	Euryarchaeota	Methanomada group	Methanobacteria	Methanobacteriales	Methanobacteriaceae	Methanobrevibacter	Methanobrevibacter oralis
1	root	cellular organisms	Bacteria	Terrabacteria group	Firmicutes	Clostridia	Eubacteriales	Eubacteriales incertae sedis	Eubacteriales Family XIII. Incertae Sedis	Baileyella	Baileyella intestinalis
1	root	cellular organisms	Bacteria	Bacteria incertae sedis	Bacteria candidate phyla	Patescibacteria group	Parcubacteria group	Candidatus Nealsonbacteria	Candidatus Nealsonbacteria bacterium
1	root	cellular organisms	Bacteria	Terrabacteria group	Cyanobacteria/Melainabacteria group	Cyanobacteria	Pseudanabaenales	Leptolyngbyaceae	Phormidesmis	Phormidesmis priestleyi
1	root	Viruses	Monodnaviria	Loebvirae	Hofneiviricota	Faserviricetes	Tubulavirales	Inoviridae	unclassified Inoviridae	Inoviridae sp.
1	root	cellular organisms	Bacteria	Terrabacteria group	Actinobacteria	Actinomycetia	Kineosporiales	Kineosporiaceae	unclassified Kineosporiaceae	Kineosporiaceae bacterium SCSIO 59966
1	root	cellular organisms	Bacteria	Proteobacteria	Gammaproteobacteria	Enterobacterales	Enterobacteriaceae	Citrobacter	Citrobacter koseri
1	root	cellular organisms	Archaea	unclassified Archaea	archaeon
1	root	cellular organisms	Bacteria	Proteobacteria	Gammaproteobacteria	Pseudomonadales	Pseudomonadaceae	Pseudomonas	environmental samples	uncultured Pseudomonas sp.
1	root	cellular organisms	Bacteria	Terrabacteria group	Firmicutes	Bacilli	Bacillales	Planococcaceae	Tetzosporium	Tetzosporium hominis
1	root	cellular organisms	Bacteria	Proteobacteria	delta/epsilon subdivisions	Deltaproteobacteria	Desulfobacterales	Desulfobulbaceae	Candidatus Electrothrix
2	root	cellular organisms	Bacteria	Proteobacteria	delta/epsilon subdivisions	Deltaproteobacteria	Desulfobacterales	Desulfobacteraceae	Desulfoluna	Desulfoluna butyratoxydans
1	root	cellular organisms	Bacteria	Terrabacteria group	Actinobacteria	Actinomycetia	Streptomycetales	Streptomycetaceae	Streptomyces	Streptomyces zhihengii
1	root	cellular organisms	Bacteria	unclassified Bacteria	bacterium I07
1	root	cellular organisms	Bacteria	FCB group	Bacteroidetes/Chlorobi group	Bacteroidetes	Flavobacteriia	Flavobacteriales	Flavobacteriaceae	Flavobacterium	unclassified Flavobacterium	Flavobacterium sp. SM15
1	root	cellular organisms	Eukaryota	Opisthokonta	Fungi	Dikarya	Basidiomycota	Agaricomycotina	Agaricomycetes	Agaricomycetidae	Agaricales	Bolbitiaceae	Panaeolus	Panaeolus cyanescens
1	root	cellular organisms	Bacteria	Proteobacteria	Gammaproteobacteria	Pseudomonadales	Perlucidibacaceae	Perlucidibaca	Perlucidibaca aquatica
1	root	cellular organisms	Bacteria	Bacteria incertae sedis	Bacteria candidate phyla	Candidatus Edwardsbacteria
1	root	cellular organisms	Bacteria	Terrabacteria group	Firmicutes	unclassified Firmicutes sensu stricto	Firmicutes bacterium M10-2
1	root	cellular organisms	Eukaryota	Opisthokonta	Fungi	Fungi incertae sedis	Mucoromycota	Mortierellomycotina	Mortierellomycetes	Mortierellales	Mortierellaceae	Linnemannia	Linnemannia gamsii
1	root	cellular organisms	Bacteria	Terrabacteria group	Firmicutes	Bacilli	Bacillales	Paenibacillaceae
1	root	cellular organisms	Bacteria	Proteobacteria	Betaproteobacteria	Neisseriales	Neisseriaceae	Kingella	Kingella negevensis
1	root	cellular organisms	Bacteria	Terrabacteria group	Firmicutes	Bacilli	Bacillales	Thermoactinomycetaceae	Kroppenstedtia	Kroppenstedtia guangzhouensis
1	root	cellular organisms	Bacteria	Proteobacteria	Betaproteobacteria	Burkholderiales	Burkholderiaceae	Burkholderia	unclassified Burkholderia	Burkholderia sp. BCC0506
1	root	cellular organisms	Bacteria	Terrabacteria group	Firmicutes	Bacilli	Bacillales	Paenibacillaceae	Paenibacillus	unclassified Paenibacillus	Paenibacillus sp. FJAT-27812
1	root	cellular organisms	Bacteria	Terrabacteria group	Firmicutes	Bacilli	Bacillales	Paenibacillaceae	Paenibacillus	unclassified Paenibacillus	Paenibacillus sp. FSL H8-0548
1	root	cellular organisms	Bacteria	Proteobacteria	Gammaproteobacteria	Thiotrichales	Piscirickettsiaceae	Thiomicrorhabdus	Thiomicrorhabdus heinhorstiae
2	root	cellular organisms	Bacteria	Proteobacteria	delta/epsilon subdivisions	Deltaproteobacteria	Desulfobacterales	Desulfobacteraceae	Desulfosarcina	Desulfosarcina cetonica
1	root	cellular organisms	Bacteria	Proteobacteria	Gammaproteobacteria	unclassified Gammaproteobacteria	gamma proteobacterium HdN1
1	root	cellular organisms	Bacteria	FCB group	Bacteroidetes/Chlorobi group	Bacteroidetes	Sphingobacteriia	Sphingobacteriales	Sphingobacteriaceae	Pedobacter	unclassified Pedobacter	Pedobacter sp. BAL39
1	root	cellular organisms	Bacteria	Terrabacteria group	Firmicutes	Bacilli	Bacillales	Bacillaceae	Bacillus	unclassified Bacillus (in: Bacteria)	Bacillus sp. FJAT-27264
1	root	cellular organisms	Bacteria	Proteobacteria	Alphaproteobacteria	Sphingomonadales	Sphingomonadaceae	Sphingosinithalassobacter	Sphingosinithalassobacter portus
1	root	cellular organisms	Bacteria	FCB group	Bacteroidetes/Chlorobi group	Bacteroidetes	Bacteroidia	Bacteroidales	Porphyromonadaceae	Porphyromonas	Porphyromonas bennonis
1	root	cellular organisms	Bacteria	FCB group	Bacteroidetes/Chlorobi group	Bacteroidetes	Sphingobacteriia	Sphingobacteriales	Sphingobacteriaceae	Pedobacter	unclassified Pedobacter	Pedobacter sp. BS3
1	root	cellular organisms	Bacteria	Terrabacteria group	Deinococcus-Thermus	Deinococci	Thermales	Thermaceae	Marinithermus	Marinithermus hydrothermalis
1	root	cellular organisms	Bacteria	Proteobacteria	Gammaproteobacteria	Alteromonadales	Idiomarinaceae	Idiomarina	Idiomarina tyrosinivorans
1	root	cellular organisms	Bacteria	Proteobacteria	Gammaproteobacteria	Methylococcales	Methylococcaceae	Methylomonas	unclassified Methylomonas	Methylomonas sp. LWB
2	root	cellular organisms	Bacteria	Proteobacteria	Betaproteobacteria	Neisseriales	Neisseriaceae	Snodgrassella	unclassified Snodgrassella
1	root	cellular organisms	Bacteria	FCB group	Bacteroidetes/Chlorobi group	Bacteroidetes	Bacteroidia	Bacteroidales	Bacteroidaceae	Bacteroides	unclassified Bacteroides	Bacteroides sp. 3_1_23
2	root	cellular organisms	Bacteria	Terrabacteria group	Firmicutes	Clostridia	Eubacteriales	Vallitaleaceae	Petrocella	Petrocella atlantisensis
2	root	cellular organisms	Bacteria	Proteobacteria	delta/epsilon subdivisions	Deltaproteobacteria	Desulfuromonadales	unclassified Desulfuromonadales	Desulfuromonadales bacterium C00003096
1	root	cellular organisms	Bacteria	PVC group	Chlamydiae	Chlamydiia	Chlamydiales	unclassified Chalmydiales	Chlamydiales bacterium 38-26
2	root	cellular organisms	Bacteria	Proteobacteria	Betaproteobacteria	Betaproteobacteria incertae sedis	Candidatus Accumulibacter	unclassified Candidatus Accumulibacter	Candidatus Accumulibacter sp. BA-93
1	root	cellular organisms	Bacteria	Proteobacteria	Alphaproteobacteria	Rhodospirillales	Acetobacteraceae	Komagataeibacter	Komagataeibacter swingsii
2	root	cellular organisms	Bacteria	Proteobacteria	delta/epsilon subdivisions	Deltaproteobacteria	Syntrophales	Syntrophaceae	Desulfobacca	unclassified Desulfobacca	Desulfobacca sp. RBG_16_60_12
1	root	cellular organisms	Bacteria	Terrabacteria group	Firmicutes	Clostridia	Eubacteriales	unclassified Eubacteriales	Clostridiales bacterium 59_14
1	root	cellular organisms	Bacteria	Bacteria incertae sedis	Bacteria candidate phyla	Candidatus Wirthbacteria	Candidatus Wirthbacteria bacterium CG2_30_54_11
1	root	cellular organisms	Bacteria	Terrabacteria group	Firmicutes	Clostridia	Halanaerobiales	Halanaerobiaceae	Halanaerobium	unclassified Halanaerobium
1	root	cellular organisms	Bacteria	Fusobacteria	Fusobacteriia	Fusobacteriales	Fusobacteriaceae	Fusobacterium	Fusobacterium mortiferum
1	root	cellular organisms	Bacteria	unclassified Bacteria	bacterium BMS3Bbin10
1	root	cellular organisms	Bacteria	Proteobacteria	Alphaproteobacteria	Hyphomicrobiales	Bradyrhizobiaceae	Bradyrhizobium	unclassified Bradyrhizobium	Bradyrhizobium sp. 6(2017)
1	root	cellular organisms	Bacteria	Terrabacteria group	Actinobacteria	Actinomycetia	Streptosporangiales	Streptosporangiaceae	Sphaerisporangium	Sphaerisporangium rufum
1	root	cellular organisms	Bacteria	Proteobacteria	Alphaproteobacteria	Sphingomonadales	Sphingomonadaceae	Sphingomonas	unclassified Sphingomonas	Sphingomonas sp. A1
1	root	cellular organisms	Bacteria	Spirochaetes	Spirochaetia	Spirochaetales	Treponemataceae	Treponema	unclassified Treponema	Treponema sp. GWC1_61_84
1	root	cellular organisms	Bacteria	Proteobacteria	Alphaproteobacteria	Rhodobacterales	Rhodobacteraceae	Falsirhodobacter	Falsirhodobacter deserti
1	root	cellular organisms	Bacteria	Terrabacteria group	Cyanobacteria/Melainabacteria group	Cyanobacteria	Gloeobacteria	Gloeobacterales	Gloeobacteraceae	Anthocerotibacter	Anthocerotibacter panamensis
1	root	cellular organisms	Bacteria	PVC group	Verrucomicrobia	Opitutae	Opitutales	Opitutaceae	Geminisphaera	Geminisphaera colitermitum
1	root	cellular organisms	Bacteria	Terrabacteria group	Deinococcus-Thermus	Deinococci	Thermales	Thermaceae	Thermus	Thermus brevis
1	root	cellular organisms	Bacteria	FCB group	Bacteroidetes/Chlorobi group	Bacteroidetes	Flavobacteriia	Flavobacteriales	Flavobacteriaceae	Aequorivita	Aequorivita sublithincola
1	root	cellular organisms	Bacteria	Terrabacteria group	Firmicutes	Clostridia	Eubacteriales	Lachnospiraceae	Blautia	Blautia hydrogenotrophica
1	root	cellular organisms	Bacteria	Proteobacteria	delta/epsilon subdivisions	Epsilonproteobacteria	Campylobacterales	Thiovulaceae	Sulfurimonas	unclassified Sulfurimonas	Sulfurimonas sp. B2
1	root	cellular organisms	Bacteria	Terrabacteria group	Firmicutes	Bacilli	Bacillales	Bacillaceae	Cytobacillus	Cytobacillus kochii
1	root	cellular organisms	Bacteria	Proteobacteria	Alphaproteobacteria	Rhodobacterales	Roseobacteraceae	Thalassobius	Thalassobius aquimarinus
1	root	cellular organisms	Bacteria	PVC group	Planctomycetes	unclassified Planctomycetes	Planctomycetes bacterium Pan189
1	root	cellular organisms	Bacteria	Proteobacteria	Gammaproteobacteria	Orbales	Orbaceae	Gilliamella	unclassified Gilliamella	Gilliamella sp. ESL0405
3	root	cellular organisms	Bacteria	Bacteria incertae sedis	Bacteria candidate phyla	Patescibacteria group	Parcubacteria group	Candidatus Yonathbacteria
1	root	cellular organisms	Bacteria	Terrabacteria group	Actinobacteria	Actinomycetia	Corynebacteriales	Gordoniaceae	Gordonia	Gordonia shandongensis
1	root	cellular organisms	Bacteria	Proteobacteria	Alphaproteobacteria	Rhodobacterales	Rhodobacteraceae	Paracoccus	unclassified Paracoccus (in: Bacteria)	Paracoccus sp. Z118
1	root	cellular organisms	Bacteria	PVC group	Chlamydiae	Chlamydiia	Chlamydiales	Chlamydiaceae	Candidatus Rubidus	Candidatus Rubidus massiliensis
1	root	cellular organisms	Bacteria	Proteobacteria	Alphaproteobacteria	Rhodospirillales	Acetobacteraceae	Paracraurococcus	Paracraurococcus ruber
1	root	cellular organisms	Bacteria	Proteobacteria	Alphaproteobacteria	Hyphomicrobiales	Methylobacteriaceae	Methylobacterium	unclassified Methylobacterium
1	root	cellular organisms	Eukaryota	Viridiplantae	Chlorophyta	Mamiellophyceae	Mamiellales	Mamiellaceae	Micromonas	Micromonas pusilla	Micromonas pusilla CCMP1545
1	root	cellular organisms	Bacteria	Acidobacteria	unclassified Acidobacteria	Acidobacteria bacterium RIFCSPLOWO2_02_FULL_59_13
1	root	cellular organisms	Bacteria	Bacteria incertae sedis	Bacteria candidate phyla	Patescibacteria group	Parcubacteria group	Candidatus Kaiserbacteria	Candidatus Kaiserbacteria bacterium RIFCSPHIGHO2_02_FULL_55_17
1	root	cellular organisms	Bacteria	Proteobacteria	Gammaproteobacteria	Xanthomonadales	Rhodanobacteraceae	Rhodanobacter	Rhodanobacter lindaniclasticus
1	root	cellular organisms	Bacteria	Proteobacteria	Alphaproteobacteria	Hyphomicrobiales	Bradyrhizobiaceae	Bradyrhizobium	unclassified Bradyrhizobium	Bradyrhizobium sp. G127
1	root	cellular organisms	Bacteria	Terrabacteria group	Actinobacteria	Actinomycetia	Micrococcales	Intrasporangiaceae	Tetrasphaera	unclassified Tetrasphaera	Tetrasphaera sp. F2B08
1	root	cellular organisms	Bacteria	Proteobacteria	delta/epsilon subdivisions	Deltaproteobacteria	unclassified Deltaproteobacteria	Deltaproteobacteria bacterium RIFOXYD12_FULL_50_9
1	root	cellular organisms	Eukaryota	Opisthokonta	Fungi	Dikarya	Ascomycota	saccharomyceta	Pezizomycotina	leotiomyceta	sordariomyceta	Leotiomycetes	Leotiomycetes incertae sedis	Pseudeurotiaceae	Pseudogymnoascus	Pseudogymnoascus destructans	Pseudogymnoascus destructans 20631-21
1	root	cellular organisms	Bacteria	Proteobacteria	delta/epsilon subdivisions	Deltaproteobacteria	Desulfuromonadales	unclassified Desulfuromonadales	Desulfuromonadales bacterium C00003094
1	root	cellular organisms	Bacteria	PVC group	Chlamydiae	Chlamydiia	Chlamydiales	unclassified Chalmydiales	Chlamydiales bacterium SCGC AB-751-O23
1	root	cellular organisms	Bacteria	Nitrospirae	unclassified Nitrospirae	Nitrospirae bacterium CG_4_10_14_3_um_filter_44_29
1	root	cellular organisms	Bacteria	Bacteria incertae sedis	Bacteria candidate phyla	Patescibacteria group	Parcubacteria group	Candidatus Magasanikbacteria	Candidatus Magasanikbacteria bacterium RIFOXYC2_FULL_39_8
1	root	cellular organisms	Bacteria	Proteobacteria	Betaproteobacteria	unclassified Betaproteobacteria	Betaproteobacteria bacterium RBG_16_64_18
1	root	cellular organisms	Bacteria	Proteobacteria	Gammaproteobacteria	Xanthomonadales	Xanthomonadaceae	Xanthomonas	Xanthomonas oryzae
1	root	cellular organisms	Bacteria	Proteobacteria	Alphaproteobacteria	Rhodobacterales	Rhodobacteraceae	Rhodovulum	unclassified Rhodovulum	Rhodovulum sp. ES.010
1	root	cellular organisms	Bacteria	Terrabacteria group	Firmicutes	Clostridia	Eubacteriales	Oscillospiraceae	Oscillospiraceae incertae sedis	[Eubacterium] siraeum	[Eubacterium] siraeum V10Sc8a
2	root	cellular organisms	Bacteria	PVC group	Verrucomicrobia	Opitutae	Puniceicoccales	Puniceicoccaceae	Puniceicoccus	Puniceicoccus vermicola
1	root	cellular organisms	Eukaryota	Opisthokonta	Fungi	Dikarya	Ascomycota	saccharomyceta	Pezizomycotina	leotiomyceta	Eurotiomycetes	Chaetothyriomycetidae	Chaetothyriales	Herpotrichiellaceae	Cladophialophora
1	root	cellular organisms	Bacteria	Proteobacteria	Alphaproteobacteria	Pelagibacterales	Pelagibacteraceae	Candidatus Pelagibacter	unclassified Candidatus Pelagibacter	Candidatus Pelagibacter sp. TMED142
1	root	cellular organisms	Bacteria	Proteobacteria	Gammaproteobacteria	Chromatiales	Ectothiorhodospiraceae
1	root	cellular organisms	Bacteria	FCB group	Bacteroidetes/Chlorobi group	Ignavibacteriae	Ignavibacteria	Ignavibacteriales	Ignavibacteriaceae	Ignavibacterium	unclassified Ignavibacterium	Ignavibacterium sp.
1	root	cellular organisms	Bacteria	Terrabacteria group	Firmicutes	Bacilli	Bacillales	Bacillaceae	Lentibacillus	Lentibacillus sediminis
1	root	cellular organisms	Bacteria	Proteobacteria	Alphaproteobacteria	Rhodobacterales	Rhodobacteraceae	Cereibacter	Cereibacter johrii
2	root	cellular organisms	Eukaryota	Viridiplantae	Chlorophyta	core chlorophytes	Chlorophyceae	CS clade	Chlamydomonadales	Chlamydomonadaceae	Chlamydomonas	Chlamydomonas schloesseri
1	root	cellular organisms	Bacteria	Terrabacteria group	Actinobacteria	Actinomycetia	Streptomycetales	Streptomycetaceae	Streptomyces	unclassified Streptomyces	Streptomyces sp. IB201691-2A2
1	root	cellular organisms	Bacteria	Proteobacteria	Alphaproteobacteria	Hyphomicrobiales	Brucellaceae
2	root	cellular organisms	Bacteria	Terrabacteria group	Cyanobacteria/Melainabacteria group	Candidatus Saganbacteria
1	root	cellular organisms	Bacteria	Bacteria incertae sedis	Bacteria candidate phyla	Patescibacteria group	Microgenomates group	Candidatus Roizmanbacteria	Candidatus Roizmanbacteria bacterium RIFCSPHIGHO2_12_FULL_42_10
1	root	cellular organisms	Bacteria	Proteobacteria	Betaproteobacteria	Burkholderiales	Burkholderiaceae	Paraburkholderia	unclassified Paraburkholderia	Paraburkholderia sp. ZD32-2
1	root	cellular organisms	Bacteria	Terrabacteria group	Firmicutes	Bacilli	Bacillales	Paenibacillaceae	Brevibacillus	Brevibacillus agri
1	root	cellular organisms	Bacteria	Proteobacteria	Gammaproteobacteria	Alteromonadales	Alteromonadaceae	Alteromonas/Salinimonas group	Alteromonas	Alteromonas halophila
1	root	cellular organisms	Bacteria	Proteobacteria	Alphaproteobacteria	Rhodobacterales	Roseobacteraceae	Leisingera	unclassified Leisingera	Leisingera sp. ANG-M1
1	root	cellular organisms	Bacteria	Terrabacteria group	Actinobacteria	Actinomycetia	Micromonosporales	Micromonosporaceae	Allocatelliglobosispora	Allocatelliglobosispora scoriae
1	root	cellular organisms	Bacteria	Proteobacteria	Alphaproteobacteria	Hyphomicrobiales	Rhizobiaceae	Rhizobium/Agrobacterium group	Neorhizobium	unclassified Neorhizobium	Neorhizobium sp. SOG26
1	root	cellular organisms	Bacteria	Proteobacteria	Betaproteobacteria	Neisseriales	Neisseriaceae	Alysiella	Alysiella filiformis
1	root	cellular organisms	Bacteria	Spirochaetes	environmental samples	uncultured Spirochaetes bacterium
1	root	cellular organisms	Eukaryota	Opisthokonta	Fungi	Dikarya	Ascomycota	saccharomyceta	Pezizomycotina	leotiomyceta	sordariomyceta	Sordariomycetes	Sordariomycetidae	Diaporthales	Valsaceae	Valsa	Valsa malicola
1	root	cellular organisms	Bacteria	Terrabacteria group	Actinobacteria	Actinomycetia	Propionibacteriales	Nocardioidaceae	Nocardioides	Nocardioides kribbensis
1	root	cellular organisms	Bacteria	FCB group	Bacteroidetes/Chlorobi group	Bacteroidetes	Cytophagia	Cytophagales	Hymenobacteraceae	Hymenobacter	Hymenobacter metallilatus
1	root	cellular organisms	Bacteria	Terrabacteria group	Actinobacteria	Actinomycetia	Micrococcales	Micrococcaceae	Arthrobacter	Arthrobacter gandavensis
1	root	cellular organisms	Bacteria	Proteobacteria	Gammaproteobacteria	Alteromonadales	unclassified Alteromonadales	gamma proteobacterium IMCC1989
1	root	cellular organisms	Bacteria	PVC group	Verrucomicrobia	Spartobacteria	Chthoniobacterales	Chthoniobacteraceae	Chthoniobacter	unclassified Chthoniobacter	Chthoniobacter sp. 12-60-6
1	root	cellular organisms	Bacteria	Terrabacteria group	Firmicutes	Bacilli	Bacillales	Bacillaceae	Hydrogenibacillus
1	root	cellular organisms	Bacteria	Terrabacteria group	Firmicutes	Bacilli	Bacillales	Staphylococcaceae	Salinicoccus	Salinicoccus halodurans
1	root	cellular organisms	Bacteria	Proteobacteria	Gammaproteobacteria	Xanthomonadales	Xanthomonadaceae	Thermomonas	unclassified Thermomonas	Thermomonas sp. RSS23
1	root	cellular organisms	Bacteria	FCB group	Bacteroidetes/Chlorobi group	Bacteroidetes	Cytophagia	Cytophagales	Cytophagaceae	Candidatus Nephrothrix	unclassified Candidatus Nephrothrix	Candidatus Nephrothrix sp. EaCA
1	root	cellular organisms	Bacteria	Terrabacteria group	Actinobacteria	Actinomycetia	Kineosporiales	Kineosporiaceae	Angustibacter	unclassified Angustibacter	Angustibacter sp. Root456
1	root	Viruses	unclassified bacterial viruses	environmental samples	uncultured phage
1	root	cellular organisms	Bacteria	Proteobacteria	Betaproteobacteria	Burkholderiales	Burkholderiaceae	Cupriavidus	Cupriavidus pauculus
1	root	cellular organisms	Bacteria	PVC group	Planctomycetes	Planctomycetia	Isosphaerales	Isosphaeraceae	Paludisphaera	unclassified Paludisphaera
1	root	cellular organisms	Bacteria	Proteobacteria	Betaproteobacteria	Nitrosomonadales	Gallionellaceae	unclassified Gallionellaceae	Gallionellaceae bacterium CG1_02_56_997
1	root	cellular organisms	Bacteria	FCB group	Bacteroidetes/Chlorobi group	Bacteroidetes	Flavobacteriia	Flavobacteriales	unclassified Flavobacteriales
1	root	cellular organisms	Bacteria	Proteobacteria	Gammaproteobacteria	Alteromonadales	Colwelliaceae	Thalassotalea
2	root	cellular organisms	Bacteria	Terrabacteria group	Actinobacteria	Actinomycetia	Corynebacteriales	Nocardiaceae	Nocardia
1	root	cellular organisms	Bacteria	Proteobacteria	Betaproteobacteria	Burkholderiales	Burkholderiaceae	Polynucleobacter	unclassified Polynucleobacter	Polynucleobacter sp. 80A-SIGWE
1	root	cellular organisms	Bacteria	Proteobacteria	delta/epsilon subdivisions	Deltaproteobacteria	unclassified Deltaproteobacteria	Deltaproteobacteria bacterium RIFCSPLOWO2_12_FULL_57_22
1	root	cellular organisms	Bacteria	Proteobacteria	Gammaproteobacteria	Legionellales	Legionellaceae	Legionella	Legionella longbeachae	Legionella longbeachae NSW150
1	root	cellular organisms	Bacteria	Proteobacteria	Alphaproteobacteria	Hyphomicrobiales	Hyphomicrobiaceae	Hyphomicrobium	unclassified Hyphomicrobium	Hyphomicrobium sp. CS1BSMeth3
1	root	cellular organisms	Bacteria	FCB group	Bacteroidetes/Chlorobi group	Bacteroidetes	Chitinophagia	Chitinophagales	Chitinophagaceae	Edaphocola
1	root	cellular organisms	Bacteria	Proteobacteria	Gammaproteobacteria	Moraxellales	Moraxellaceae	Acinetobacter	unclassified Acinetobacter	Acinetobacter sp. YH16032
1	root	cellular organisms	Bacteria	FCB group	Bacteroidetes/Chlorobi group	Bacteroidetes	Flavobacteriia	Flavobacteriales	Flavobacteriaceae	Winogradskyella	Winogradskyella helgolandensis
1	root	cellular organisms	Bacteria	Proteobacteria	Hydrogenophilalia	Hydrogenophilales	unclassified Hydrogenophilales	Hydrogenophilales bacterium 12-63-5
1	root	cellular organisms	Archaea	DPANN group	Candidatus Aenigmarchaeota	unclassified Aenigmarchaeota	Candidatus Aenigmarchaeota archaeon
1	root	cellular organisms	Bacteria	Terrabacteria group	Firmicutes	Clostridia	Eubacteriales	Eubacteriaceae	Alkalibacter	unclassified Alkalibacter	Alkalibacter sp. ES005
2	root	cellular organisms	Bacteria	Proteobacteria	Hydrogenophilalia	Hydrogenophilales	unclassified Hydrogenophilales	Hydrogenophilales bacterium 17-61-9
1	root	cellular organisms	Bacteria	Terrabacteria group	Firmicutes	Erysipelotrichia	Erysipelotrichales	Erysipelotrichaceae	Longicatena	Longicatena caecimuris
1	root	cellular organisms	Bacteria	Terrabacteria group	Tenericutes	Mollicutes	Mycoplasmatales	Mycoplasmataceae	Mesomycoplasma	Mesomycoplasma hyorhinis
1	root	cellular organisms	Bacteria	Proteobacteria	Gammaproteobacteria	Pseudomonadales	Pseudomonadaceae	Pseudomonas	unclassified Pseudomonas	Pseudomonas sp. LFM046
2	root	cellular organisms	Bacteria	Proteobacteria	Alphaproteobacteria	Rhodobacterales	Roseobacteraceae	Salipiger
1	root	cellular organisms	Bacteria	Proteobacteria	Alphaproteobacteria	Parvularculales	Parvularculaceae	Parvularcula	Parvularcula bermudensis	Parvularcula bermudensis HTCC2503
1	root	cellular organisms	Bacteria	Proteobacteria	Alphaproteobacteria	Rhodospirillales	Azospirillaceae	Azospirillum	unclassified Azospirillum	Azospirillum sp. YIM B02556
1	root	cellular organisms	Bacteria	Proteobacteria	Alphaproteobacteria	Sphingomonadales	Sphingomonadaceae	Parasphingopyxis	Parasphingopyxis marina
1	root	cellular organisms	Bacteria	Acidobacteria	Acidobacteriia	Acidobacteriales	Acidobacteriaceae	Granulicella	unclassified Granulicella	Granulicella sp. L46
1	root	cellular organisms	Bacteria	Terrabacteria group	Actinobacteria	Actinomycetia	Propionibacteriales	Nocardioidaceae	Nocardioides	unclassified Nocardioides	Nocardioides sp. YR527
1	root	cellular organisms	Bacteria	Bacteria incertae sedis	Bacteria candidate phyla	Patescibacteria group	Parcubacteria group	Candidatus Wolfebacteria
2	root	cellular organisms	Bacteria	Terrabacteria group	Firmicutes	Clostridia	Eubacteriales	Clostridiaceae	Clostridium	unclassified Clostridium	Clostridium sp. CS001
2	root	Viruses	Duplodnaviria	Heunggongvirae	Uroviricota	Caudoviricetes	Caudovirales	Myoviridae	Tevenvirinae	Pseudotevenvirus
2	root	cellular organisms	Bacteria	Proteobacteria	delta/epsilon subdivisions	Epsilonproteobacteria	Campylobacterales	Campylobacteraceae	Campylobacter	unclassified Campylobacter
1	root	cellular organisms	Bacteria	FCB group	Bacteroidetes/Chlorobi group	Bacteroidetes	Flavobacteriia	Flavobacteriales	Flavobacteriaceae	Kordia
1	root	cellular organisms	Bacteria	Proteobacteria	Betaproteobacteria	Neisseriales	Neisseriaceae	Neisseria	Neisseria wadsworthii
1	root	cellular organisms	Bacteria	Proteobacteria	Gammaproteobacteria	Thiotrichales	Thiotrichaceae	Leucothrix	Leucothrix sargassi
1	root	cellular organisms	Bacteria	Proteobacteria	Gammaproteobacteria	Xanthomonadales	Xanthomonadaceae	Arenimonas	unclassified Arenimonas	Arenimonas sp. SCN 70-307
1	root	cellular organisms	Archaea	Euryarchaeota	Candidatus Methanoliparia	Candidatus Methanoliparales	Candidatus Methanoliparaceae	Candidatus Methanoliparum
1	root	cellular organisms	Bacteria	Proteobacteria	Betaproteobacteria	Nitrosomonadales	Nitrosomonadaceae
1	root	cellular organisms	Bacteria	Terrabacteria group	Actinobacteria	Actinomycetia	Micromonosporales	Micromonosporaceae	Actinoplanes	Actinoplanes ovalisporus
1	root	cellular organisms	Bacteria	Terrabacteria group	Actinobacteria	Actinomycetia	Streptomycetales	Streptomycetaceae	Yinghuangia	unclassified Yinghuangia	Yinghuangia sp. ASG 101
1	root	cellular organisms	Bacteria	Proteobacteria	Betaproteobacteria	Neisseriales	Chromobacteriaceae	Gulbenkiania	Gulbenkiania mobilis
1	root	cellular organisms	Bacteria	Proteobacteria	Alphaproteobacteria	Caulobacterales	Caulobacteraceae	Brevundimonas	unclassified Brevundimonas	Brevundimonas sp. P7753
1	root	cellular organisms	Bacteria	Proteobacteria	Gammaproteobacteria	Thiotrichales	Piscirickettsiaceae	Cycloclasticus
1	root	cellular organisms	Bacteria	Terrabacteria group	Actinobacteria	Actinomycetia	Corynebacteriales	Corynebacteriaceae	Corynebacterium	Corynebacterium endometrii
1	root	cellular organisms	Bacteria	FCB group	Bacteroidetes/Chlorobi group	Bacteroidetes	Flavobacteriia	Flavobacteriales	Flavobacteriaceae	Tenacibaculum	unclassified Tenacibaculum
1	root	cellular organisms	Bacteria	Proteobacteria	Alphaproteobacteria	Rhodobacterales	Rhodobacteraceae	Paracoccus	Paracoccus homiensis
1	root	cellular organisms	Bacteria	Proteobacteria	Gammaproteobacteria	Pseudomonadales	Pseudomonadaceae	Pseudomonas	unclassified Pseudomonas	Pseudomonas sp. gcc21
3	root	cellular organisms	Bacteria	PVC group	Verrucomicrobia	unclassified Verrucomicrobia	Verrucomicrobia bacterium SCN 57-15
1	root	cellular organisms	Bacteria	Proteobacteria	Alphaproteobacteria	Rhodospirillales	Geminicoccaceae	unclassified Geminicoccaceae	Geminicoccaceae bacterium
1	root	cellular organisms	Bacteria	Terrabacteria group	Actinobacteria	Actinomycetia	Streptomycetales	Streptomycetaceae	Streptomyces	Streptomyces caeruleatus
2	root	cellular organisms	Bacteria	Terrabacteria group	Firmicutes	Clostridia	Eubacteriales	Oscillospiraceae	Neglectibacter	Neglectibacter timonensis
1	root	cellular organisms	Bacteria	Terrabacteria group	Firmicutes	Clostridia	Eubacteriales	Oscillospiraceae	Ruminococcus	Ruminococcus callidus
1	root	cellular organisms	Bacteria	Proteobacteria	Alphaproteobacteria	Rhodobacterales	unclassified Rhodobacterales	Rhodobacterales bacterium 12-65-15
1	root	cellular organisms	Bacteria	Terrabacteria group	Actinobacteria	Actinomycetia	Streptomycetales	Streptomycetaceae	Streptomyces	unclassified Streptomyces	Streptomyces sp. JCM17656
1	root	cellular organisms	Bacteria	Terrabacteria group	Firmicutes	Bacilli	Bacillales	Paenibacillaceae	Paenibacillus	unclassified Paenibacillus	Paenibacillus sp. UY79
1	root	cellular organisms	Bacteria	Proteobacteria	Alphaproteobacteria	Hyphomicrobiales	Rhizobiaceae	Rhizobium/Agrobacterium group	Rhizobium	unclassified Rhizobium	Rhizobium sp. C1
1	root	cellular organisms	Bacteria	Proteobacteria	Betaproteobacteria	Burkholderiales	Burkholderiales genera incertae sedis	Rubrivivax
1	root	cellular organisms	Bacteria	unclassified Bacteria	bacterium ADurb.BinA186
1	root	cellular organisms	Bacteria	Proteobacteria	Gammaproteobacteria	Enterobacterales	Yersiniaceae	Yersinia	Yersinia rochesterensis
1	root	cellular organisms	Bacteria	Terrabacteria group	Firmicutes	Clostridia	Eubacteriales	Clostridiaceae	Clostridium	environmental samples	Clostridium sp. CAG:91
1	root	cellular organisms	Bacteria	Proteobacteria	Alphaproteobacteria	Rhodospirillales	Rhodospirillaceae	unclassified Rhodospirillaceae	Rhodospirillaceae bacterium TMED167
1	root	cellular organisms	Bacteria	Terrabacteria group	Cyanobacteria/Melainabacteria group	Cyanobacteria	Nostocales	Scytonemataceae
1	root	cellular organisms	Bacteria	Terrabacteria group	Actinobacteria	Actinomycetia	Micrococcales	Micrococcaceae	Arthrobacter	Arthrobacter cheniae
1	root	cellular organisms	Bacteria	Terrabacteria group	Firmicutes	Clostridia	Eubacteriales	Clostridiaceae	unclassified Clostridiaceae	Clostridiaceae bacterium Marseille-Q4143
1	root	cellular organisms	Bacteria	Terrabacteria group	Firmicutes	Clostridia	Eubacteriales	Lachnospiraceae	Butyrivibrio	unclassified Butyrivibrio
1	root	cellular organisms	Bacteria	Proteobacteria	Betaproteobacteria	Neisseriales	Chromobacteriaceae	Paludibacterium	Paludibacterium purpuratum
1	root	cellular organisms	Bacteria	Proteobacteria	Alphaproteobacteria	Hyphomicrobiales	Methylobacteriaceae	Microvirga	Microvirga ossetica
1	root	cellular organisms	Bacteria	FCB group	Bacteroidetes/Chlorobi group	Bacteroidetes	Cytophagia	Cytophagales	Cyclobacteriaceae	Cyclobacterium	Cyclobacterium xiamenense
1	root	cellular organisms	Bacteria	FCB group	Bacteroidetes/Chlorobi group	Bacteroidetes	Bacteroidia	Bacteroidales	Prevotellaceae	Prevotella	environmental samples	Prevotella sp. CAG:279
1	root	cellular organisms	Bacteria	Terrabacteria group	Cyanobacteria/Melainabacteria group	Cyanobacteria	Gloeobacteria	Gloeobacterales	Gloeobacteraceae	Gloeobacter
2	root	cellular organisms	Bacteria	PVC group	Candidatus Omnitrophica	unclassified Candidatus Omnitrophica	Omnitrophica WOR_2 bacterium RIFCSPLOWO2_12_FULL_50_9
1	root	cellular organisms	Bacteria	Nitrospirae	unclassified Nitrospirae	Nitrospirae bacterium CG22_combo_CG10-13_8_21_14_all_44_11
1	root	cellular organisms	Bacteria	Proteobacteria	Alphaproteobacteria	Sphingomonadales	Sphingomonadaceae	Sphingomonas	Sphingomonas corticis
1	root	cellular organisms	Bacteria	Terrabacteria group	Actinobacteria	Actinomycetia	Streptosporangiales	Streptosporangiaceae	Planomonospora	unclassified Planomonospora	Planomonospora sp. ID67723
1	root	cellular organisms	Bacteria	Proteobacteria	Gammaproteobacteria	Alteromonadales	Alteromonadales genera incertae sedis	Aestuariicella	unclassified Aestuariicella	Aestuariicella sp. HHU G3-2
1	root	cellular organisms	Bacteria	Bacteria incertae sedis	Bacteria candidate phyla	Candidatus Doudnabacteria	Candidatus Doudnabacteria bacterium RIFCSPHIGHO2_01_FULL_49_9
1	root	cellular organisms	Bacteria	FCB group	Bacteroidetes/Chlorobi group	Bacteroidetes	Bacteroidia	Bacteroidales	Dysgonomonadaceae	Dysgonomonas	unclassified Dysgonomonas	Dysgonomonas sp. Marseille-P4677
1	root	cellular organisms	Bacteria	Terrabacteria group	Cyanobacteria/Melainabacteria group	Cyanobacteria	Nostocales	Nostocaceae	Anabaena	Anabaena minutissima
1	root	cellular organisms	Bacteria	Proteobacteria	Alphaproteobacteria	Caulobacterales	unclassified Caulobacterales	Caulobacterales bacterium RIFCSPHIGHO2_01_FULL_70_19
1	root	cellular organisms	Bacteria	FCB group	Bacteroidetes/Chlorobi group	Bacteroidetes	Flavobacteriia	Flavobacteriales	Flavobacteriaceae	Flavobacterium	Flavobacterium amnicola
1	root	cellular organisms	Bacteria	FCB group	Bacteroidetes/Chlorobi group	Chlorobi	unclassified Chlorobi	Chlorobi bacterium
1	root	cellular organisms	Bacteria	FCB group	Bacteroidetes/Chlorobi group	Bacteroidetes	Bacteroidia	Bacteroidales	Bacteroidaceae	Phocaeicola	Phocaeicola sartorii
1	root	cellular organisms	Bacteria	Proteobacteria	Betaproteobacteria	Nitrosomonadales	Gallionellaceae	Ferriphaselus	Ferriphaselus amnicola
1	root	cellular organisms	Bacteria	FCB group	Bacteroidetes/Chlorobi group	Bacteroidetes	Bacteroidia	Bacteroidales	Barnesiellaceae
1	root	cellular organisms	Bacteria	Proteobacteria	Gammaproteobacteria	Alteromonadales	Ferrimonadaceae	Ferrimonas	Ferrimonas sediminicola
1	root	cellular organisms	Bacteria	Proteobacteria	Betaproteobacteria	Burkholderiales	Comamonadaceae	Acidovorax	unclassified Acidovorax	Acidovorax sp. MR-S7
1	root	cellular organisms	Bacteria	Proteobacteria	Gammaproteobacteria	Pseudomonadales	Pseudomonadaceae	Pseudomonas	unclassified Pseudomonas	Pseudomonas sp. StFLB209
1	root	cellular organisms	Bacteria	Proteobacteria	Alphaproteobacteria	Hyphomonadales	Hyphomonadaceae	unclassified Hyphomonadaceae	Hyphomonadaceae bacterium TMED5
1	root	cellular organisms	Bacteria	Proteobacteria	Alphaproteobacteria	Sphingomonadales	Sphingomonadaceae	Sphingobium	unclassified Sphingobium	Sphingobium sp. D43FB
2	root	cellular organisms	Bacteria	FCB group	Bacteroidetes/Chlorobi group	Bacteroidetes	Bacteroidia	Bacteroidales	Tannerellaceae	Parabacteroides	Parabacteroides pacaensis
1	root	Viruses	Duplodnaviria	Heunggongvirae	Uroviricota	Caudoviricetes	Caudovirales	Podoviridae	unclassified Podoviridae	crAss-like viruses	UAG-readthrough crAss clade
1	root	cellular organisms	Bacteria	Terrabacteria group	Firmicutes	Clostridia	Eubacteriales	Clostridiaceae	Sarcina
1	root	cellular organisms	Bacteria	Terrabacteria group	Firmicutes	Clostridia	Thermosediminibacterales	Thermosediminibacteraceae	Fervidicola	Fervidicola ferrireducens
1	root	cellular organisms	Bacteria	Proteobacteria	Gammaproteobacteria	Chromatiales	Chromatiaceae	Rheinheimera	unclassified Rheinheimera	Rheinheimera sp. F8
1	root	cellular organisms	Bacteria	Proteobacteria	Alphaproteobacteria	Hyphomicrobiales	Methylobacteriaceae	Methylobacterium	Methylobacterium brachiatum
1	root	cellular organisms	Bacteria	FCB group	Bacteroidetes/Chlorobi group	Bacteroidetes	Flavobacteriia	Flavobacteriales	Flavobacteriaceae	Flavobacterium	Flavobacterium silvisoli
1	root	cellular organisms	Bacteria	Proteobacteria	Alphaproteobacteria	Hyphomicrobiales	Xanthobacteraceae	Azorhizobium	Azorhizobium oxalatiphilum
1	root	cellular organisms	Bacteria	FCB group	Bacteroidetes/Chlorobi group	Bacteroidetes	Cytophagia	Cytophagales	Fulvivirgaceae	Fulvivirga	unclassified Fulvivirga	Fulvivirga sp. M361
1	root	cellular organisms	Eukaryota	Sar	Stramenopiles	Oomycota	Saprolegniales	Saprolegniaceae	Saprolegnia	Saprolegnia diclina	Saprolegnia diclina VS20
1	root	cellular organisms	Bacteria	Proteobacteria	Alphaproteobacteria	Sphingomonadales	Sphingomonadaceae	Sphingomonas	Sphingomonas aerophila
1	root	cellular organisms	Bacteria	FCB group	Bacteroidetes/Chlorobi group	Balneolaeota	Balneolia	Balneolales	Balneolaceae	Aliifodinibius	Aliifodinibius halophilus
1	root	cellular organisms	Bacteria	Proteobacteria	Gammaproteobacteria	Oceanospirillales	Oceanospirillaceae	Neptunomonas	Neptunomonas japonica
1	root	cellular organisms	Bacteria	Proteobacteria	Alphaproteobacteria	Rhodobacterales	Rhodobacteraceae	Rhodovulum	Rhodovulum robiginosum
1	root	cellular organisms	Archaea	Euryarchaeota	Stenosarchaea group	Methanomicrobia	Methanomicrobiales	Methanomicrobiaceae	Methanoculleus	Methanoculleus chikugoensis
1	root	Viruses	Duplodnaviria	Heunggongvirae	Uroviricota	Caudoviricetes	Caudovirales	Myoviridae	Vequintavirinae	unclassified Vequintavirinae	Klebsiella phage vB_KpM_FBKp34
1	root	Viruses	Duplodnaviria	Heunggongvirae	Uroviricota	Caudoviricetes	Caudovirales	Siphoviridae	unclassified Siphoviridae	Cylindrospermopsis phage Cr-LKS3
1	root	cellular organisms	Bacteria	Bacteria incertae sedis	Bacteria candidate phyla	Patescibacteria group	Microgenomates group	Candidatus Gottesmanbacteria	Candidatus Gottesmanbacteria bacterium RIFCSPHIGHO2_01_FULL_39_10
1	root	cellular organisms	Eukaryota	Opisthokonta	Fungi	Dikarya	Basidiomycota	Agaricomycotina	Agaricomycetes	Agaricomycetes incertae sedis	Russulales	Russulaceae	Russula	Russula aff. rugulosa BPL654
1	root	cellular organisms	Bacteria	Proteobacteria	Gammaproteobacteria	Pseudomonadales	Pseudomonadaceae	Pseudomonas	unclassified Pseudomonas	Pseudomonas sp. PDM18
1	root	cellular organisms	Bacteria	Proteobacteria	Alphaproteobacteria	Rhodobacterales	Roseobacteraceae	Sulfitobacter	Sulfitobacter pseudonitzschiae
1	root	cellular organisms	Bacteria	Proteobacteria	Gammaproteobacteria	Moraxellales	Moraxellaceae	Acinetobacter	Acinetobacter junii	Acinetobacter junii NIPH 182
2	root	cellular organisms	Bacteria	Proteobacteria	Betaproteobacteria	Nitrosomonadales	Methylophilaceae	Methylotenera	Methylotenera mobilis
1	root	cellular organisms	Archaea	Euryarchaeota	Stenosarchaea group	Halobacteria
1	root	cellular organisms	Bacteria	FCB group	Bacteroidetes/Chlorobi group	Bacteroidetes	Cytophagia	Cytophagales	Cytophagaceae	Siphonobacter	Siphonobacter aquaeclarae
1	root	cellular organisms	Bacteria	Proteobacteria	Betaproteobacteria	Burkholderiales	Comamonadaceae	Diaphorobacter	unclassified Diaphorobacter	Diaphorobacter sp. LR2014-1
1	root	cellular organisms	Bacteria	Terrabacteria group	Actinobacteria	Actinomycetia	Pseudonocardiales	Pseudonocardiaceae	Amycolatopsis	Amycolatopsis australiensis
1	root	cellular organisms	Bacteria	Proteobacteria	Alphaproteobacteria	Hyphomicrobiales	Rhizobiaceae	Rhizobium/Agrobacterium group	Neorhizobium	unclassified Neorhizobium	Neorhizobium sp. P12A
1	root	cellular organisms	Bacteria	FCB group	Bacteroidetes/Chlorobi group	Bacteroidetes	Sphingobacteriia	Sphingobacteriales	Sphingobacteriaceae	Sphingobacterium	unclassified Sphingobacterium	Sphingobacterium sp. ML3W
2	root	cellular organisms	Bacteria	Proteobacteria	delta/epsilon subdivisions	Deltaproteobacteria	Desulfobacterales	Desulfobacteraceae	Desulfobotulus	Desulfobotulus alkaliphilus
1	root	cellular organisms	Bacteria	Proteobacteria	Alphaproteobacteria	Hyphomicrobiales	Afifellaceae	Afifella
1	root	cellular organisms	Bacteria	Terrabacteria group	Actinobacteria	Actinomycetia	Actinomycetales	Actinomycetaceae	Schaalia
1	root	cellular organisms	Bacteria	Proteobacteria	Gammaproteobacteria	Pseudomonadales	Pseudomonadaceae	Pseudomonas	Pseudomonas syringae group	Pseudomonas viridiflava
1	root	cellular organisms	Bacteria	Bacteria incertae sedis	Bacteria candidate phyla	Patescibacteria group	Parcubacteria group	Candidatus Nomurabacteria	Candidatus Nomurabacteria bacterium GW2011_GWB1_40_7
1	root	cellular organisms	Bacteria	Proteobacteria	Betaproteobacteria	Burkholderiales	Burkholderiaceae	Polynucleobacter	unclassified Polynucleobacter	Polynucleobacter sp. 24-46-87
1	root	cellular organisms	Bacteria	Proteobacteria	Betaproteobacteria	Burkholderiales	Burkholderiaceae	Trinickia	unclassified Trinickia
1	root	cellular organisms	Bacteria	Proteobacteria	Alphaproteobacteria	Rhodospirillales	Geminicoccaceae	Geminicoccus	unclassified Geminicoccus
1	root	cellular organisms	Bacteria	Proteobacteria	Betaproteobacteria	Burkholderiales	Burkholderiales genera incertae sedis	Inhella	Inhella inkyongensis
1	root	cellular organisms	Bacteria	Terrabacteria group	Firmicutes	Clostridia	Eubacteriales	Lachnospiraceae	Mediterraneibacter	[Ruminococcus] gnavus
1	root	cellular organisms	Bacteria	Terrabacteria group	Firmicutes	Bacilli	Bacillales	Paenibacillaceae	Paenibacillus	Paenibacillus barcinonensis
1	root	cellular organisms	Bacteria	FCB group	Bacteroidetes/Chlorobi group	Bacteroidetes	Flavobacteriia	Flavobacteriales	Flavobacteriaceae	Planktosalinus	Planktosalinus lacus
1	root	cellular organisms	Bacteria	Terrabacteria group	Tenericutes	Mollicutes	Entomoplasmatales	Entomoplasmataceae	Mesoplasma	Mesoplasma tabanidae
2	root	cellular organisms	Bacteria	FCB group	Fibrobacteres	Fibrobacteria	Fibrobacterales	Fibrobacteraceae	Fibrobacter	Fibrobacter succinogenes
1	root	cellular organisms	Bacteria	FCB group	Bacteroidetes/Chlorobi group	Bacteroidetes	Flavobacteriia	Flavobacteriales	Crocinitomicaceae	Brumimicrobium	Brumimicrobium salinarum
1	root	cellular organisms	Bacteria	Proteobacteria	Gammaproteobacteria	Xanthomonadales	Xanthomonadaceae	Stenotrophomonas	unclassified Stenotrophomonas	Stenotrophomonas sp. 278
1	root	cellular organisms	Bacteria	Terrabacteria group	Firmicutes	Clostridia	Eubacteriales	Lachnospiraceae	Robinsoniella
1	root	cellular organisms	Bacteria	Terrabacteria group	Actinobacteria	Actinomycetia	Micrococcales	Cellulomonadaceae	Cellulomonas	Cellulomonas terrae
1	root	cellular organisms	Bacteria	Terrabacteria group	Firmicutes	Bacilli	Bacillales	Alicyclobacillaceae	Alicyclobacillus	Alicyclobacillus contaminans
1	root	cellular organisms	Bacteria	Proteobacteria	Alphaproteobacteria	Hyphomicrobiales	Cohaesibacteraceae	Cohaesibacter
1	root	cellular organisms	Bacteria	Terrabacteria group	Actinobacteria	Actinomycetia	Micromonosporales	Micromonosporaceae	Catellatospora	Catellatospora sichuanensis
1	root	cellular organisms	Bacteria	Proteobacteria	Alphaproteobacteria	Hyphomicrobiales	Devosiaceae	Maritalea	Maritalea myrionectae
1	root	cellular organisms	Bacteria	Proteobacteria	Betaproteobacteria	Burkholderiales	Oxalobacteraceae	Massilia group	Massilia	Massilia flava
1	root	cellular organisms	Bacteria	FCB group	Bacteroidetes/Chlorobi group	Bacteroidetes	Sphingobacteriia	Sphingobacteriales	Sphingobacteriaceae	Mucilaginibacter	Mucilaginibacter glaciei
1	root	cellular organisms	Bacteria	Terrabacteria group	Firmicutes	Clostridia	Eubacteriales	Lachnospiraceae	Lachnospiraceae incertae sedis	[Eubacterium] rectale
3	root	cellular organisms	Bacteria	Proteobacteria	delta/epsilon subdivisions	Deltaproteobacteria	Desulfobacterales	Desulfobacteraceae	Desulforapulum	Desulforapulum autotrophicum
1	root	cellular organisms	Bacteria	Proteobacteria	Alphaproteobacteria	Rhodospirillales	unclassified Rhodospirillales	Rhodospirillales bacterium TMPK1
1	root	cellular organisms	Bacteria	Terrabacteria group	Actinobacteria	Actinomycetia	Geodermatophilales	Geodermatophilaceae	Modestobacter	Modestobacter excelsi
1	root	cellular organisms	Bacteria	Terrabacteria group	Firmicutes	Bacilli	Lactobacillales	Streptococcaceae	Streptococcus	Streptococcus pyogenes
1	root	cellular organisms	Bacteria	Proteobacteria	Betaproteobacteria	Nitrosomonadales	Nitrosomonadaceae	Nitrosospira	unclassified Nitrosospira	Nitrosospira sp. Nsp11
1	root	cellular organisms	Bacteria	Terrabacteria group	Actinobacteria	Actinomycetia	Micrococcales	Promicromonosporaceae	Promicromonospora	Promicromonospora sukumoe
1	root	cellular organisms	Bacteria	Terrabacteria group	Actinobacteria	Coriobacteriia	unclassified Coriobacteriia	Coriobacteriia bacterium
1	root	cellular organisms	Bacteria	FCB group	Bacteroidetes/Chlorobi group	Bacteroidetes	Flavobacteriia	Flavobacteriales	Crocinitomicaceae	Crocinitomix	Crocinitomix catalasitica
1	root	cellular organisms	Bacteria	FCB group	Bacteroidetes/Chlorobi group	Bacteroidetes	Bacteroidia	Bacteroidales	Rikenellaceae	Alistipes	unclassified Alistipes	Alistipes sp. An66
1	root	cellular organisms	Bacteria	Terrabacteria group	Actinobacteria	Actinomycetia	Kineosporiales	Kineosporiaceae	Kineococcus	Kineococcus vitellinus
2	root	cellular organisms	Bacteria	Terrabacteria group	Firmicutes	Clostridia	Eubacteriales	Eubacteriales incertae sedis	Eubacteriales Family XII. Incertae Sedis	Fusibacter	Fusibacter paucivorans
1	root	cellular organisms	Bacteria	Terrabacteria group	Firmicutes	Clostridia	Eubacteriales	unclassified Eubacteriales
1	root	cellular organisms	Bacteria	Proteobacteria	Betaproteobacteria	Neisseriales	Neisseriaceae	Kingella	Kingella bonacorsii
1	root	cellular organisms	Bacteria	Proteobacteria	delta/epsilon subdivisions	Deltaproteobacteria	Desulfobacterales	Desulfobacteraceae	unclassified Desulfobacteraceae	Desulfobacteraceae bacterium 4572_187
1	root	cellular organisms	Bacteria	Proteobacteria	Gammaproteobacteria	Pseudomonadales	Pseudomonadaceae	Pseudomonas	Pseudomonas fluorescens group	Pseudomonas veronii
1	root	cellular organisms	Bacteria	Proteobacteria	delta/epsilon subdivisions	Deltaproteobacteria	Desulfuromonadales	Geobacteraceae	Geobacter	unclassified Geobacter	Geobacter sp. AOG1
1	root	cellular organisms	Bacteria	Terrabacteria group	Firmicutes	Clostridia	Thermoanaerobacterales	Thermoanaerobacteraceae	Moorella group	Moorella	Moorella glycerini
1	root	cellular organisms	Bacteria	Terrabacteria group	Actinobacteria	Actinomycetia	Corynebacteriales	Mycobacteriaceae	Mycobacterium	Mycobacterium gastri	Mycobacterium gastri 'Wayne'
1	root	cellular organisms	Bacteria	Terrabacteria group	Actinobacteria	Actinomycetia	Corynebacteriales	Nocardiaceae	Nocardia	Nocardia gamkensis
2	root	Viruses	Duplodnaviria	Heunggongvirae	Uroviricota	Caudoviricetes	Caudovirales	Podoviridae	Lightbulbvirus
1	root	cellular organisms	Bacteria	Elusimicrobia	unclassified Elusimicrobia	Elusimicrobia bacterium RIFOXYA2_FULL_58_8
1	root	cellular organisms	Bacteria	Proteobacteria	Alphaproteobacteria	Rhodobacterales	Rhodobacteraceae	Amaricoccus	unclassified Amaricoccus	Amaricoccus sp. HAR-UPW-R2A-40
1	root	cellular organisms	Bacteria	Terrabacteria group	Actinobacteria	Actinomycetia	Pseudonocardiales	Pseudonocardiaceae	Saccharopolyspora	Saccharopolyspora flava
1	root	cellular organisms	Bacteria	Proteobacteria	Gammaproteobacteria	Oceanospirillales	Halomonadaceae	Halomonas	Halomonas salipaludis
2	root	Viruses	Duplodnaviria	Heunggongvirae	Uroviricota	Caudoviricetes	Caudovirales	Myoviridae	Menderavirus
1	root	cellular organisms	Bacteria	Terrabacteria group	Firmicutes	Bacilli	Bacillales	Bacillaceae	Bacillus	Bacillus subtilis group	Bacillus amyloliquefaciens group	Bacillus amyloliquefaciens
1	root	cellular organisms	Bacteria	Proteobacteria	Alphaproteobacteria	Rhodospirillales	Kiloniellaceae	Kiloniella	Kiloniella litopenaei
1	root	cellular organisms	Bacteria	Proteobacteria	Alphaproteobacteria	Rhodobacterales	Roseobacteraceae	Marivita	Marivita lacus
3	root	cellular organisms	Bacteria	Proteobacteria	Betaproteobacteria	Neisseriales	Neisseriaceae	unclassified Neisseriaceae	Neisseriaceae bacterium
1	root	cellular organisms	Bacteria	Terrabacteria group	Firmicutes	Clostridia	Eubacteriales	Lachnospiraceae	Anaerocolumna	Anaerocolumna chitinilytica
1	root	cellular organisms	Bacteria	Bacteria incertae sedis	Bacteria candidate phyla	Patescibacteria group	Parcubacteria group	Candidatus Staskawiczbacteria	Candidatus Staskawiczbacteria bacterium RIFOXYC1_FULL_38_18
1	root	cellular organisms	Bacteria	Terrabacteria group	Actinobacteria	Actinomycetia	Micrococcales	Microbacteriaceae	Microbacterium	Microbacterium ulmi
1	root	cellular organisms	Bacteria	Proteobacteria	Betaproteobacteria	Nitrosomonadales	Thiobacillaceae	Thiobacillus	unclassified Thiobacillus	Thiobacillus sp. SCN 64-35
1	root	cellular organisms	Bacteria	Proteobacteria	Betaproteobacteria	Burkholderiales	Burkholderiaceae	Cupriavidus	unclassified Cupriavidus	Cupriavidus sp. AcVe19-6a
1	root	Viruses	Duplodnaviria	Heunggongvirae	Uroviricota	Caudoviricetes	Caudovirales	Demerecviridae	Sugarlandvirus	unclassified Sugarlandvirus	Klebsiella phage PWKp9S
2	root	cellular organisms	Bacteria	Proteobacteria	Gammaproteobacteria	Oceanospirillales	Halomonadaceae	Halomonas	Halomonas titanicae	Halomonas titanicae BH1
1	root	cellular organisms	Bacteria	Proteobacteria	Alphaproteobacteria	Hyphomonadales	Hyphomonadaceae	Henriciella	unclassified Henriciella	Henriciella sp.
1	root	cellular organisms	Bacteria	Proteobacteria	Alphaproteobacteria	Hyphomicrobiales	Phyllobacteriaceae	Zhengella	Zhengella mangrovi
1	root	cellular organisms	Bacteria	Proteobacteria	Alphaproteobacteria	Hyphomicrobiales	Bradyrhizobiaceae	Bradyrhizobium	Bradyrhizobium elkanii
1	root	cellular organisms	Bacteria	Terrabacteria group	Firmicutes	Clostridia	Eubacteriales	Desulfallaceae	Desulfoscipio	Desulfoscipio gibsoniae
1	root	cellular organisms	Bacteria	Proteobacteria	Betaproteobacteria	Betaproteobacteria incertae sedis	Candidatus Accumulibacter	unclassified Candidatus Accumulibacter	Candidatus Accumulibacter sp. SK-02
1	root	cellular organisms	Eukaryota	Opisthokonta	Fungi	Dikarya	Ascomycota	saccharomyceta	Pezizomycotina	leotiomyceta	sordariomyceta	Sordariomycetes	Hypocreomycetidae	Hypocreales	Nectriaceae	Fusarium
1	root	cellular organisms	Bacteria	PVC group	Candidatus Omnitrophica	unclassified Candidatus Omnitrophica	Omnitrophica bacterium RBG_13_46_9
2	root	cellular organisms	Bacteria	FCB group	Bacteroidetes/Chlorobi group	Bacteroidetes	Cytophagia	Cytophagales	Hymenobacteraceae	Hymenobacter	Hymenobacter baengnokdamensis
3	root	cellular organisms	Bacteria	Proteobacteria	Alphaproteobacteria	Hyphomicrobiales	Phyllobacteriaceae	Mesorhizobium	unclassified Mesorhizobium	Mesorhizobium sp. IRAMC:0171
1	root	cellular organisms	Bacteria	Terrabacteria group	Firmicutes	Bacilli	Bacillales	Bacillaceae	Geobacillus	unclassified Geobacillus	Geobacillus sp. BMUD
1	root	cellular organisms	Bacteria	Terrabacteria group	Firmicutes	Bacilli	Lactobacillales	Carnobacteriaceae	Alkalibacterium	unclassified Alkalibacterium	Alkalibacterium sp.
1	root	cellular organisms	Bacteria	Terrabacteria group	Actinobacteria	Actinomycetia	Jiangellales	Jiangellaceae	Jiangella
1	root	cellular organisms	Bacteria	FCB group	Bacteroidetes/Chlorobi group	Bacteroidetes	Cytophagia	Cytophagales	Hymenobacteraceae	Rufibacter	Rufibacter tibetensis
1	root	cellular organisms	Bacteria	Proteobacteria	Alphaproteobacteria	Hyphomicrobiales	Bradyrhizobiaceae	Bradyrhizobium	Bradyrhizobium ivorense
1	root	cellular organisms	Bacteria	Terrabacteria group	Actinobacteria	Actinomycetia	Micromonosporales	Micromonosporaceae	Polymorphospora	Polymorphospora rubra
1	root	cellular organisms	Bacteria	Nitrospirae	Nitrospira	Nitrospirales	Nitrospiraceae	Nitrospira	unclassified Nitrospira	Nitrospira sp. KM1
1	root	cellular organisms	Bacteria	Proteobacteria	Gammaproteobacteria	Moraxellales	Moraxellaceae	Acinetobacter	Acinetobacter halotolerans
1	root	cellular organisms	Bacteria	Terrabacteria group	Actinobacteria	Actinomycetia	Frankiales	Frankiaceae	Frankia	unclassified Frankia	Frankia sp. QA3
1	root	cellular organisms	Bacteria	Proteobacteria	Alphaproteobacteria	Hyphomicrobiales	Brucellaceae	Brucella/Ochrobactrum group	Ochrobactrum	unclassified Ochrobactrum
1	root	cellular organisms	Bacteria	Terrabacteria group	Firmicutes	Clostridia	Eubacteriales	Peptostreptococcaceae	Intestinibacter	Intestinibacter bartlettii
1	root	cellular organisms	Eukaryota	Opisthokonta	Fungi	Fungi incertae sedis	Mucoromycota	Mucoromycotina	Umbelopsidomycetes	Umbelopsidales	Umbelopsidaceae	Umbelopsis	unclassified Umbelopsis	Umbelopsis sp. PMI_123
1	root	cellular organisms	Bacteria	Proteobacteria	Alphaproteobacteria	Rickettsiales	Candidatus Midichloriaceae	Candidatus Midichloria	Candidatus Midichloria mitochondrii
1	root	cellular organisms	Bacteria	FCB group	Bacteroidetes/Chlorobi group	Bacteroidetes	Flavobacteriia	Flavobacteriales	Flavobacteriaceae	Flavobacterium	unclassified Flavobacterium	Flavobacterium sp. CJ74
1	root	cellular organisms	Bacteria	Proteobacteria	Alphaproteobacteria	Hyphomicrobiales	Phyllobacteriaceae	Chelativorans	unclassified Chelativorans	Chelativorans sp. J32
1	root	cellular organisms	Bacteria	Terrabacteria group	Actinobacteria	Actinomycetia	Propionibacteriales	Propionibacteriaceae	Microlunatus	Microlunatus phosphovorus
2	root	cellular organisms	Bacteria	Terrabacteria group	Firmicutes	Clostridia	Eubacteriales	Clostridiaceae	Clostridium	environmental samples	Clostridium sp. CAG:221
1	root	cellular organisms	Bacteria	FCB group	Bacteroidetes/Chlorobi group	Bacteroidetes	Cytophagia	Cytophagales	Cyclobacteriaceae	Algoriphagus
1	root	cellular organisms	Bacteria	Proteobacteria	Alphaproteobacteria	Hyphomicrobiales	Phyllobacteriaceae	Mesorhizobium	unclassified Mesorhizobium	Mesorhizobium sp. M4B.F.Ca.ET.089.01.1.1
4	root	cellular organisms	Bacteria	Proteobacteria	Alphaproteobacteria	Hyphomicrobiales	Rhodovibrionaceae	Pelagibius	unclassified Pelagibius	Pelagibius sp. NBU2595
1	root	cellular organisms	Bacteria	Proteobacteria	Gammaproteobacteria	Nevskiales	Sinobacteraceae	Sinimarinibacterium	unclassified Sinimarinibacterium	Sinimarinibacterium sp. NLF-5-8
1	root	cellular organisms	Bacteria	Proteobacteria	Gammaproteobacteria	Oceanospirillales	Natronospirillaceae	Natronospirillum	Natronospirillum operosum
1	root	cellular organisms	Bacteria	Proteobacteria	Alphaproteobacteria	Rhodospirillales	Acetobacteraceae	Acetobacter	Acetobacter persici
1	root	cellular organisms	Bacteria	Terrabacteria group	Firmicutes	Clostridia	Eubacteriales	Lachnospiraceae	Lachnotalea	unclassified Lachnotalea	Lachnotalea sp. AF33-28
2	root	cellular organisms	Bacteria	Terrabacteria group	Actinobacteria	Actinomycetia	Streptosporangiales	Streptosporangiaceae	Bailinhaonella	Bailinhaonella thermotolerans
1	root	cellular organisms	Bacteria	FCB group	Bacteroidetes/Chlorobi group	Bacteroidetes	Cytophagia	Cytophagales	Cytophagaceae	Spirosoma	unclassified Spirosoma	Spirosoma sp. KCTC 42546
3	root	cellular organisms	Bacteria	FCB group	Bacteroidetes/Chlorobi group	Bacteroidetes	unclassified Bacteroidetes	Bacteroidetes bacterium 4572_128
1	root	cellular organisms	Eukaryota	Discoba	Euglenozoa	Kinetoplastea	Metakinetoplastina	Trypanosomatida	Trypanosomatidae	Leishmaniinae	Leishmania	Mundinia	unclassified Mundinia	Leishmania sp. Ghana 2012 LV757
1	root	cellular organisms	Bacteria	FCB group	Bacteroidetes/Chlorobi group	Bacteroidetes	Flavobacteriia	Flavobacteriales	Flavobacteriaceae	Aequorivita	unclassified Aequorivita	Aequorivita sp. CIP111184
1	root	cellular organisms	Bacteria	FCB group	Bacteroidetes/Chlorobi group	Bacteroidetes	Chitinophagia	Chitinophagales	Chitinophagaceae	Flavihumibacter	Flavihumibacter soli
1	root	cellular organisms	Bacteria	Terrabacteria group	Actinobacteria	Actinomycetia	Micrococcales	Microbacteriaceae	Microbacterium	unclassified Microbacterium	Microbacterium sp. AR7-10
2	root	cellular organisms	Bacteria	Terrabacteria group	Actinobacteria	Actinomycetia	Micrococcales	Ruaniaceae	Occultella	Occultella glacieicola
1	root	cellular organisms	Bacteria	Terrabacteria group	Chloroflexi	Thermomicrobia	Thermomicrobia incertae sedis	Thermorudis	Thermorudis peleae
1	root	cellular organisms	Bacteria	Proteobacteria	delta/epsilon subdivisions	Deltaproteobacteria	Myxococcales	Cystobacterineae	Myxococcaceae	Myxococcus	unclassified Myxococcus	Myxococcus sp. AB025B
1	root	cellular organisms	Bacteria	Proteobacteria	delta/epsilon subdivisions	Deltaproteobacteria	Desulfobacterales	unclassified Desulfobacterales	Desulfobacterales bacterium S5133MH16
2	root	cellular organisms	Bacteria	Proteobacteria	Betaproteobacteria	Burkholderiales	Comamonadaceae	Calidifontimicrobium	Calidifontimicrobium sediminis
1	root	cellular organisms	Bacteria	Terrabacteria group	Actinobacteria	Actinomycetia	Geodermatophilales	Geodermatophilaceae	Modestobacter
1	root	cellular organisms	Bacteria	FCB group	Bacteroidetes/Chlorobi group	Bacteroidetes	Cytophagia	Cytophagales	Hymenobacteraceae	Hymenobacter	unclassified Hymenobacter	Hymenobacter sp. BT523
1	root	cellular organisms	Bacteria	Proteobacteria	Gammaproteobacteria	Oceanospirillales	Oceanospirillaceae	Marinospirillum
1	root	cellular organisms	Bacteria	Terrabacteria group	Firmicutes	Clostridia	Eubacteriales	Lachnospiraceae	Shuttleworthia
2	root	cellular organisms	Bacteria	Proteobacteria	Alphaproteobacteria	Rickettsiales	unclassified Rickettsiales	Rickettsiales bacterium
1	root	cellular organisms	Bacteria	Thermotogae	Thermotogae	Thermotogales	Fervidobacteriaceae	Thermosipho	Thermosipho africanus
1	root	cellular organisms	Bacteria	Proteobacteria	Gammaproteobacteria	Oceanospirillales	Alcanivoracaceae	Alcanivorax	unclassified Alcanivorax	Alcanivorax sp. Alg238-V104
1	root	cellular organisms	Eukaryota	Opisthokonta	Fungi	Dikarya	Ascomycota	saccharomyceta	Pezizomycotina	leotiomyceta	sordariomyceta	Sordariomycetes	Hypocreomycetidae	Hypocreales	Cordycipitaceae	Akanthomyces	Akanthomyces lecanii	Akanthomyces lecanii RCEF 1005
1	root	cellular organisms	Bacteria	Proteobacteria	Betaproteobacteria	Burkholderiales	Burkholderiaceae	Cupriavidus	Cupriavidus plantarum
1	root	cellular organisms	Bacteria	Proteobacteria	Gammaproteobacteria	Pseudomonadales	Marinobacteraceae	Marinobacter	Marinobacter zhejiangensis
1	root	cellular organisms	Bacteria	Proteobacteria	Gammaproteobacteria	Enterobacterales	Morganellaceae	Arsenophonus	unclassified Arsenophonus	Arsenophonus endosymbiont of Aleurodicus floccissimus
1	root	cellular organisms	Bacteria	Proteobacteria	Alphaproteobacteria	Hyphomicrobiales	Hyphomicrobiaceae	Hyphomicrobium	unclassified Hyphomicrobium	Hyphomicrobium sp. ghe19
1	root	cellular organisms	Bacteria	Proteobacteria	Alphaproteobacteria	Hyphomicrobiales	Rhizobiaceae	Rhizobium/Agrobacterium group	Rhizobium	unclassified Rhizobium	Rhizobium sp. CFBP 8752
1	root	cellular organisms	Bacteria	Terrabacteria group	Cyanobacteria/Melainabacteria group	Cyanobacteria	Synechococcales	Prochlorococcaceae	Cyanobium	unclassified Cyanobium
1	root	cellular organisms	Bacteria	Proteobacteria	Gammaproteobacteria	Pasteurellales	Pasteurellaceae	Gallibacterium	Gallibacterium genomosp. 2
1	root	cellular organisms	Bacteria	Terrabacteria group	Firmicutes	Bacilli	Bacillales	Bacillaceae	Geobacillus	Geobacillus stearothermophilus
1	root	cellular organisms	Bacteria	Proteobacteria	Gammaproteobacteria	Oceanospirillales	Halomonadaceae	Halomonas	Halomonas coralii
1	root	cellular organisms	Bacteria	Terrabacteria group	Firmicutes	Tissierellia	Tissierellales	Peptoniphilaceae	Anaerococcus	Anaerococcus provencensis
2	root	cellular organisms	Bacteria	PVC group	Candidatus Omnitrophica	unclassified Candidatus Omnitrophica	Candidatus Omnitrophica bacterium CG11_big_fil_rev_8_21_14_0_20_63_9
1	root	cellular organisms	Bacteria	Terrabacteria group	Actinobacteria	Actinomycetia	Geodermatophilales	Antricoccaceae	Antricoccus	Antricoccus suffuscus
4	root	cellular organisms	Bacteria	FCB group	Bacteroidetes/Chlorobi group	Bacteroidetes	unclassified Bacteroidetes	Bacteroidetes bacterium 4484_276
2	root	cellular organisms	Bacteria	Proteobacteria	Gammaproteobacteria	Enterobacterales	Erwiniaceae	Pantoea
1	root	cellular organisms	Bacteria	FCB group	Bacteroidetes/Chlorobi group	Bacteroidetes	Bacteroidia	Bacteroidales	Bacteroidaceae	Bacteroides	environmental samples	Bacteroides sp. CAG:754
2	root	cellular organisms	Bacteria	Proteobacteria	Alphaproteobacteria	Rhodobacterales	Roseobacteraceae	Ruegeria	unclassified Ruegeria
1	root	cellular organisms	Bacteria	Terrabacteria group	Actinobacteria	Nitriliruptoria	Nitriliruptorales	Nitriliruptoraceae	Nitriliruptor	Nitriliruptor alkaliphilus
1	root	cellular organisms	Archaea	Asgard group	Candidatus Lokiarchaeota	unclassified Lokiarchaeota	Candidatus Lokiarchaeota archaeon CR_4
2	root	cellular organisms	Bacteria	Proteobacteria	Gammaproteobacteria	Aeromonadales	Aeromonadaceae	Oceanisphaera	Oceanisphaera litoralis
1	root	cellular organisms	Bacteria	Terrabacteria group	Firmicutes	Clostridia	Eubacteriales	unclassified Eubacteriales	Clostridiales bacterium 38-18
2	root	cellular organisms	Bacteria	Proteobacteria	Alphaproteobacteria	Hyphomicrobiales	Reyranellaceae	Reyranella	Reyranella soli
1	root	cellular organisms	Bacteria	Proteobacteria	Alphaproteobacteria	Rhodospirillales	Acetobacteraceae	Komagataeibacter	Komagataeibacter xylinus
1	root	cellular organisms	Bacteria	Proteobacteria	Alphaproteobacteria	Hyphomicrobiales	Methylobacteriaceae	Methylobacterium	Methylobacterium haplocladii
2	root	cellular organisms	Bacteria	Acidobacteria	Blastocatellia	Chloracidobacterium	Chloracidobacterium validum
1	root	cellular organisms	Bacteria	Terrabacteria group	Firmicutes	Bacilli	Lactobacillales	Carnobacteriaceae	Trichococcus	Trichococcus flocculiformis
1	root	cellular organisms	Bacteria	FCB group	Bacteroidetes/Chlorobi group	Bacteroidetes	Cytophagia	Cytophagales	Spirosomaceae	Dyadobacter	Dyadobacter bucti
1	root	cellular organisms	Bacteria	FCB group	Bacteroidetes/Chlorobi group	Bacteroidetes	Sphingobacteriia	Sphingobacteriales	Sphingobacteriaceae	Pedobacter	unclassified Pedobacter	Pedobacter sp. Hv1
2	root	cellular organisms	Bacteria	Proteobacteria	Betaproteobacteria	Burkholderiales	Burkholderiales genera incertae sedis	Aquabacterium	Aquabacterium terrae
1	root	cellular organisms	Bacteria	Terrabacteria group	Chloroflexi	Anaerolineae	Anaerolineales	Anaerolineaceae	unclassified Anaerolineaceae	Anaerolineaceae bacterium 4572_32.1
1	root	cellular organisms	Bacteria	Proteobacteria	Alphaproteobacteria	Rhodobacterales	Rhodobacteraceae	Limimaricola	Limimaricola soesokkakensis
1	root	cellular organisms	Bacteria	Proteobacteria	delta/epsilon subdivisions	Deltaproteobacteria	Syntrophales	Syntrophaceae	Smithella	unclassified Smithella	Smithella sp. F21
1	root	cellular organisms	Bacteria	Terrabacteria group	Actinobacteria	Actinomycetia	Micrococcales	Dermabacteraceae	Brachybacterium	unclassified Brachybacterium	Brachybacterium sp. YJGR34
2	root	cellular organisms	Bacteria	FCB group	Bacteroidetes/Chlorobi group	Bacteroidetes	Flavobacteriia	Flavobacteriales	Flavobacteriaceae	Flavobacterium	unclassified Flavobacterium
1	root	Viruses	Duplodnaviria	Heunggongvirae	Uroviricota	Caudoviricetes	Caudovirales	Podoviridae	unclassified Podoviridae	crAss-like viruses	CrAss-like virus sp. ctYsL76
1	root	cellular organisms	Bacteria	Proteobacteria	Alphaproteobacteria	Rhodobacterales	Roseobacteraceae	Primorskyibacter	Primorskyibacter sedentarius
2	root	cellular organisms	Bacteria	Proteobacteria	Gammaproteobacteria	Pseudomonadales	Pseudomonadaceae	Permianibacter	Permianibacter fluminis
1	root	cellular organisms	Bacteria	FCB group	Bacteroidetes/Chlorobi group	Bacteroidetes	Sphingobacteriia	Sphingobacteriales	Sphingobacteriaceae	Pedobacter	Pedobacter insulae
1	root	cellular organisms	Archaea	DPANN group	Candidatus Altiarchaeota	Candidatus Altiarchaeales	unclassified Candidatus Altiarchaeales	Candidatus Altiarchaeales archaeon HGW-Altiarchaeales-1
1	root	cellular organisms	Bacteria	Proteobacteria	Gammaproteobacteria	Alteromonadales	Alteromonadaceae	Aliagarivorans	Aliagarivorans marinus
1	root	cellular organisms	Bacteria	Proteobacteria	Alphaproteobacteria	Rhodobacterales	Rhodobacteraceae	Oceanicella	unclassified Oceanicella	Oceanicella sp. SM1341
1	root	cellular organisms	Bacteria	Proteobacteria	Betaproteobacteria	Burkholderiales	Oxalobacteraceae	Massilia group	Massilia	unclassified Massilia	Massilia sp. MAHUQ-52
1	root	cellular organisms	Bacteria	Proteobacteria	Alphaproteobacteria	Rhodospirillales	Acetobacteraceae	Acetobacter	Acetobacter sacchari
1	root	cellular organisms	Bacteria	Proteobacteria	Betaproteobacteria	Burkholderiales	Oxalobacteraceae	Undibacterium	Undibacterium amnicola
1	root	cellular organisms	Bacteria	Proteobacteria	Alphaproteobacteria	Rhodospirillales	Acetobacteraceae	Dankookia	Dankookia rubra
2	root	cellular organisms	Bacteria	Proteobacteria	Gammaproteobacteria	Moraxellales	Moraxellaceae	Acinetobacter	Acinetobacter seohaensis
1	root	cellular organisms	Bacteria	Proteobacteria	Alphaproteobacteria	Hyphomicrobiales	Stappiaceae	Roseibium	unclassified Roseibium	Roseibium sp. TrichSKD4
1	root	cellular organisms	Bacteria	Terrabacteria group	Firmicutes	Clostridia	Thermoanaerobacterales	Thermoanaerobacterales Family IV. Incertae Sedis	Mahella	Mahella australiensis
1	root	cellular organisms	Bacteria	Bacteria incertae sedis	Bacteria candidate phyla	Candidatus Saccharibacteria
1	root	cellular organisms	Bacteria	Terrabacteria group	Actinobacteria	Actinomycetia	Micromonosporales	Micromonosporaceae	Longispora	Longispora fulva
2	root	cellular organisms	Bacteria	Terrabacteria group	Firmicutes	Clostridia	Eubacteriales	Oscillospiraceae	Ruminococcus	unclassified Ruminococcus	Ruminococcus sp. NK3A76
1	root	cellular organisms	Bacteria	FCB group	Bacteroidetes/Chlorobi group	Bacteroidetes	Sphingobacteriia	Sphingobacteriales	Sphingobacteriaceae	Mucilaginibacter	unclassified Mucilaginibacter	Mucilaginibacter sp. dw_454
1	root	cellular organisms	Bacteria	Proteobacteria	Gammaproteobacteria	Pseudomonadales	Pseudomonadaceae	Pseudomonas	unclassified Pseudomonas	Pseudomonas sp. Bc-h
1	root	cellular organisms	Bacteria	Proteobacteria	Gammaproteobacteria	Pseudomonadales	Pseudomonadaceae	Pseudomonas	unclassified Pseudomonas	Pseudomonas sp. SCT
1	root	cellular organisms	Bacteria	Proteobacteria	Betaproteobacteria	Nitrosomonadales	Sulfuricellaceae	Sulfuriferula	Sulfuriferula thiophila
1	root	cellular organisms	Bacteria	Proteobacteria	Betaproteobacteria	Burkholderiales	Comamonadaceae	Ramlibacter	unclassified Ramlibacter	Ramlibacter sp. WS9
1	root	cellular organisms	Bacteria	Proteobacteria	delta/epsilon subdivisions	Epsilonproteobacteria	Campylobacterales	Campylobacteraceae	Sulfurospirillum	Sulfurospirillum cavolei
1	root	cellular organisms	Bacteria	Proteobacteria	Alphaproteobacteria	Hyphomicrobiales	Methylobacteriaceae	Methylobacterium	unclassified Methylobacterium	Methylobacterium sp. B4
1	root	cellular organisms	Bacteria	FCB group	Bacteroidetes/Chlorobi group	Bacteroidetes	Flavobacteriia	Flavobacteriales	Flavobacteriaceae	Psychroflexus	unclassified Psychroflexus	Psychroflexus sp. CCL10W
1	root	cellular organisms	Bacteria	Proteobacteria	Betaproteobacteria	Neisseriales	Chromobacteriaceae	Silvimonas
1	root	cellular organisms	Bacteria	Proteobacteria	Gammaproteobacteria	Oceanospirillales	Alcanivoracaceae	Alcanivorax	unclassified Alcanivorax	Alcanivorax sp. 1008
1	root	cellular organisms	Bacteria	Proteobacteria	unclassified Proteobacteria	Proteobacteria bacterium SG_bin7
6	root	cellular organisms	Bacteria	Proteobacteria	delta/epsilon subdivisions	Deltaproteobacteria	Syntrophobacterales	Syntrophobacteraceae	unclassified Syntrophobacteraceae	Syntrophobacteraceae bacterium CG2_30_61_12
4	root	cellular organisms	Bacteria	PVC group	Verrucomicrobia	Spartobacteria	unclassified Spartobacteria	Spartobacteria bacterium AMD-G5
1	root	cellular organisms	Bacteria	FCB group	Bacteroidetes/Chlorobi group	Bacteroidetes	Flavobacteriia	Flavobacteriales	Flavobacteriaceae	Flavobacterium	Flavobacterium cutihirudinis
1	root	cellular organisms	Bacteria	Proteobacteria	Alphaproteobacteria	Sphingomonadales	Sphingosinicellaceae	Pacificimonas	unclassified Pacificimonas	Pacificimonas sp. WHA3
1	root	cellular organisms	Bacteria	Proteobacteria	Alphaproteobacteria	Sphingomonadales	Sphingomonadaceae	Sphingobium	unclassified Sphingobium	Sphingobium sp. CAP-1
1	root	cellular organisms	Bacteria	Proteobacteria	Alphaproteobacteria	Rhodobacterales	Rhodobacteraceae	Pseudorhodobacter	Pseudorhodobacter ferrugineus
1	root	cellular organisms	Bacteria	Terrabacteria group	Firmicutes	Clostridia	Eubacteriales	Lachnospiraceae	Roseburia	environmental samples	uncultured Roseburia sp.
1	root	cellular organisms	Bacteria	Proteobacteria	Gammaproteobacteria	Oceanospirillales	Oceanospirillaceae	Nitrincola	Nitrincola iocasae
1	root	Viruses	Duplodnaviria	Heunggongvirae	Uroviricota	Caudoviricetes	Caudovirales	Podoviridae	Lessievirus	Burkholderia virus Bcep22	Burkholderia phage Bcep22
1	root	cellular organisms	Bacteria	Terrabacteria group	Actinobacteria	Acidimicrobiia	Acidimicrobiales	Ilumatobacteraceae	Ilumatobacter	Ilumatobacter fluminis
1	root	cellular organisms	Bacteria	Terrabacteria group	Actinobacteria	Actinomycetia	Streptomycetales	Streptomycetaceae	Streptomyces	Streptomyces misionensis
1	root	cellular organisms	Bacteria	FCB group	candidate division LCP-89	candidate division LCP-89 bacterium B3_LCP
1	root	cellular organisms	Bacteria	Bacteria incertae sedis	Bacteria candidate phyla	Candidatus Schekmanbacteria
1	root	cellular organisms	Bacteria	Terrabacteria group	Cyanobacteria/Melainabacteria group	Cyanobacteria	unclassified Cyanobacteria	filamentous cyanobacterium Phorm 46
2	root	cellular organisms	Bacteria	Proteobacteria	Alphaproteobacteria	Rhodobacterales	Rhodobacteraceae	Halovulum	Halovulum marinum
1	root	cellular organisms	Bacteria	Proteobacteria	Gammaproteobacteria	Nevskiales	Steroidobacteraceae	Steroidobacter	Steroidobacter gossypii
2	root	cellular organisms	Bacteria	Terrabacteria group	Firmicutes	Erysipelotrichia	Erysipelotrichales	Erysipelotrichaceae	Faecalicoccus	Faecalicoccus pleomorphus
1	root	cellular organisms	Bacteria	Proteobacteria	Gammaproteobacteria	Enterobacterales	Enterobacteriaceae	Escherichia	Escherichia coli	Escherichia coli M605
2	root	cellular organisms	Bacteria	Proteobacteria	Betaproteobacteria	Burkholderiales	Burkholderiales genera incertae sedis
1	root	cellular organisms	Bacteria	Proteobacteria	Gammaproteobacteria	unclassified Gammaproteobacteria	Gammaproteobacteria bacterium HGW-Gammaproteobacteria-3
1	root	cellular organisms	Bacteria	Proteobacteria	delta/epsilon subdivisions	Deltaproteobacteria	Myxococcales	Cystobacterineae
1	root	cellular organisms	Bacteria	Terrabacteria group	Actinobacteria	Actinomycetia	Streptomycetales	Streptomycetaceae	Streptomyces	unclassified Streptomyces	Streptomyces sp. NRRL F-5650
1	root	cellular organisms	Bacteria	Proteobacteria	Betaproteobacteria	Burkholderiales	Alcaligenaceae	Achromobacter	Achromobacter arsenitoxydans
4	root	cellular organisms	Bacteria	PVC group	Candidatus Omnitrophica	Candidatus Omnitrophus	Candidatus Omnitrophus magneticus
1	root	cellular organisms	Bacteria	Terrabacteria group	Firmicutes	Bacilli	Bacillales	Paenibacillaceae	Paenibacillus	unclassified Paenibacillus	Paenibacillus sp. YPD9-1
1	root	cellular organisms	Bacteria	Terrabacteria group	Firmicutes	Clostridia	Eubacteriales	Eubacteriaceae	Alkalibaculum	Alkalibaculum sporogenes
1	root	cellular organisms	Bacteria	Proteobacteria	Alphaproteobacteria	Rhodospirillales	Thalassospiraceae	Thalassospira	Thalassospira lucentensis
1	root	cellular organisms	Bacteria	FCB group	Bacteroidetes/Chlorobi group	Bacteroidetes	Flavobacteriia	Flavobacteriales	Flavobacteriaceae	Muriicola	Muriicola jejuensis
1	root	cellular organisms	Bacteria	Proteobacteria	Betaproteobacteria	Nitrosomonadales	Methylophilaceae	Candidatus Methylopumilus	Candidatus Methylopumilus universalis
1	root	cellular organisms	Bacteria	Bacteria incertae sedis	Bacteria candidate phyla	Candidatus Dojkabacteria	candidate division WS6 bacterium OLB21
1	root	cellular organisms	Bacteria	Nitrospinae/Tectomicrobia group	Candidatus Tectomicrobia	unclassified Candidatus Tectomicrobia
2	root	cellular organisms	Bacteria	Proteobacteria	Alphaproteobacteria	Rhodospirillales	Thalassospiraceae	Thalassospira
1	root	cellular organisms	Bacteria	Terrabacteria group	Cyanobacteria/Melainabacteria group	Cyanobacteria	Pseudanabaenales	Pseudanabaenaceae	Limnothrix	unclassified Limnothrix
1	root	cellular organisms	Bacteria	FCB group	Bacteroidetes/Chlorobi group	Ignavibacteriae	Ignavibacteria	Ignavibacteriales	Ignavibacteriaceae	unclassified Ignavibacteriaceae	Ignavibacteriaceae bacterium
1	root	cellular organisms	Bacteria	Proteobacteria	Gammaproteobacteria	Pasteurellales	Pasteurellaceae	Haemophilus	Haemophilus parainfluenzae
1	root	cellular organisms	Bacteria	Proteobacteria	Alphaproteobacteria	Rhodospirillales	Acetobacteraceae	Gluconacetobacter	Gluconacetobacter diazotrophicus
1	root	cellular organisms	Bacteria	Terrabacteria group	Actinobacteria	Actinomycetia	Streptomycetales	Streptomycetaceae	Streptomyces	unclassified Streptomyces	Streptomyces sp. TP-A0356
1	root	cellular organisms	Bacteria	Terrabacteria group	Firmicutes	environmental samples	Firmicutes bacterium CAG:238
2	root	cellular organisms	Bacteria	Proteobacteria	Alphaproteobacteria	Hyphomicrobiales	Hyphomicrobiaceae	Rhodoplanes	Rhodoplanes roseus
1	root	cellular organisms	Bacteria	Proteobacteria	Gammaproteobacteria	Pseudomonadales	Pseudomonadaceae	Pseudomonas	unclassified Pseudomonas	Pseudomonas sp. OF001
1	root	cellular organisms	Bacteria	PVC group	Candidatus Omnitrophica	unclassified Candidatus Omnitrophica	Candidatus Omnitrophica bacterium 4484_70.1
1	root	cellular organisms	Bacteria	Proteobacteria	Gammaproteobacteria	Chromatiales	Ectothiorhodospiraceae	Acidihalobacter	Acidihalobacter prosperus
1	root	cellular organisms	Bacteria	Proteobacteria	delta/epsilon subdivisions	Deltaproteobacteria	Desulfovibrionales	Desulfohalobiaceae	Desulfonatronovibrio	Desulfonatronovibrio hydrogenovorans
1	root	cellular organisms	Bacteria	Proteobacteria	Alphaproteobacteria	Rhodospirillales	Acetobacteraceae	Sabulicella	Sabulicella rubraurantiaca
1	root	cellular organisms	Bacteria	Proteobacteria	Gammaproteobacteria	Pseudomonadales	Pseudomonadaceae	Pseudomonas	Pseudomonas aeruginosa group	Pseudomonas aeruginosa	Pseudomonas aeruginosa PS42
1	root	cellular organisms	Bacteria	Proteobacteria	Gammaproteobacteria	Chromatiales	Ectothiorhodospiraceae	Aquisalimonas	Aquisalimonas asiatica
2	root	cellular organisms	Eukaryota	Opisthokonta	Fungi	Dikarya	Ascomycota	saccharomyceta	Pezizomycotina	leotiomyceta	Eurotiomycetes	Eurotiomycetidae	Eurotiales	Aspergillaceae	Aspergillus
1	root	cellular organisms	Bacteria	Terrabacteria group	Firmicutes	Bacilli	Bacillales	Planococcaceae	Paenisporosarcina	unclassified Paenisporosarcina	Paenisporosarcina sp. TG-14
3	root	cellular organisms	Bacteria	Terrabacteria group	Firmicutes	Bacilli	Lactobacillales	Lactobacillaceae	Lactobacillus
2	root	cellular organisms	Bacteria	Proteobacteria	Alphaproteobacteria	Rhodobacterales	Roseobacteraceae	Salipiger	Salipiger manganoxidans
1	root	cellular organisms	Bacteria	FCB group	Bacteroidetes/Chlorobi group	Bacteroidetes	Bacteroidia	Bacteroidales	Prevotellaceae	Prevotella	environmental samples	Prevotella sp. CAG:924
1	root	cellular organisms	Bacteria	Terrabacteria group	Actinobacteria	Actinomycetia	Corynebacteriales	Nocardiaceae	Nocardia	Nocardia farcinica
1	root	cellular organisms	Bacteria	Terrabacteria group	Cyanobacteria/Melainabacteria group	Cyanobacteria	Nostocales	Tolypothrichaceae	Tolypothrix	Tolypothrix bouteillei
1	root	cellular organisms	Bacteria	Proteobacteria	Alphaproteobacteria	Sphingomonadales	Sphingomonadaceae	Sphingobium	unclassified Sphingobium	Sphingobium sp. HDIP04
1	root	cellular organisms	Bacteria	Terrabacteria group	Firmicutes	Clostridia	Eubacteriales	Clostridiaceae	Clostridium	environmental samples	Clostridium sp. CAG:710
1	root	cellular organisms	Bacteria	Proteobacteria	Alphaproteobacteria	Hyphomicrobiales	Phyllobacteriaceae	Oricola	Oricola thermophila
1	root	cellular organisms	Bacteria	Proteobacteria	Gammaproteobacteria	Xanthomonadales	Xanthomonadaceae	Thermomonas	Thermomonas hydrothermalis
1	root	cellular organisms	Archaea	TACK group	Crenarchaeota	Thermoprotei	Thermoproteales	Thermoproteaceae	Pyrobaculum	Pyrobaculum aerophilum
1	root	cellular organisms	Bacteria	Terrabacteria group	Firmicutes	Clostridia	Eubacteriales	Clostridiaceae	Clostridium	Clostridium felsineum
1	root	cellular organisms	Bacteria	Acidobacteria	Blastocatellia	Chloracidobacterium
1	root	cellular organisms	Bacteria	Terrabacteria group	Firmicutes	Bacilli	Bacillales	Bacillaceae	Alkalihalobacillus	Alkalihalobacillus krulwichiae
1	root	cellular organisms	Bacteria	Proteobacteria	Gammaproteobacteria	Moraxellales	Moraxellaceae	Acinetobacter	unclassified Acinetobacter	Acinetobacter sp. SwsAc5
1	root	cellular organisms	Bacteria	FCB group	Bacteroidetes/Chlorobi group	Bacteroidetes	Cytophagia	Cytophagales	Cyclobacteriaceae	Algoriphagus	Algoriphagus marincola	Algoriphagus marincola HL-49
1	root	cellular organisms	Bacteria	Proteobacteria	Betaproteobacteria	Rhodocyclales	Rhodocyclaceae	Rhodocyclus	Rhodocyclus tenuis
1	root	cellular organisms	Bacteria	FCB group	Bacteroidetes/Chlorobi group	Bacteroidetes	Chitinophagia	Chitinophagales	Chitinophagaceae	Flavihumibacter	Flavihumibacter cheonanensis
1	root	cellular organisms	Bacteria	Proteobacteria	Betaproteobacteria	Nitrosomonadales	Methylophilaceae	Methylotenera	unclassified Methylotenera	Methylotenera sp. G11
2	root	cellular organisms	Bacteria	Proteobacteria	Alphaproteobacteria	Rhodospirillales	Rhodospirillaceae	Magnetospirillum	Magnetospirillum fulvum
2	root	cellular organisms	Bacteria	Proteobacteria	Alphaproteobacteria	Sphingomonadales	Sphingosinicellaceae	Sandaracinobacter	Sandaracinobacter neustonicus
1	root	cellular organisms	Bacteria	Terrabacteria group	Armatimonadetes	unclassified Armatimonadetes	Armatimonadetes bacterium 55-13
1	root	cellular organisms	Bacteria	Proteobacteria	Alphaproteobacteria	Hyphomicrobiales	Rhabdaerophilaceae	Rhabdaerophilum	Rhabdaerophilum calidifontis
1	root	cellular organisms	Bacteria	Terrabacteria group	Firmicutes	Erysipelotrichia	Erysipelotrichales	Coprobacillaceae	Coprobacillus	environmental samples	Coprobacillus sp. CAG:698
1	root	cellular organisms	Bacteria	Proteobacteria	Gammaproteobacteria	Xanthomonadales	Rhodanobacteraceae	Luteibacter	unclassified Luteibacter	Luteibacter sp. UNCMF366Tsu5.1
1	root	cellular organisms	Bacteria	PVC group	Lentisphaerae	Lentisphaeria
1	root	cellular organisms	Bacteria	Proteobacteria	Alphaproteobacteria	Hyphomicrobiales	Hyphomicrobiaceae	Dichotomicrobium	Dichotomicrobium thermohalophilum
1	root	cellular organisms	Bacteria	Nitrospirae	Nitrospira	Nitrospirales	Nitrospiraceae	Candidatus Magnetobacterium
1	root	cellular organisms	Bacteria	Terrabacteria group	Actinobacteria	Actinomycetia	Streptomycetales	Streptomycetaceae	Streptomyces	Streptomyces radicis
1	root	cellular organisms	Bacteria	Proteobacteria	Betaproteobacteria	Burkholderiales	Oxalobacteraceae	Massilia group	Massilia	Massilia aquatica
1	root	cellular organisms	Bacteria	Terrabacteria group	Actinobacteria	Actinomycetia	Propionibacteriales	Propionibacteriaceae	Naumannella	Naumannella cuiyingiana
1	root	cellular organisms	Bacteria	Proteobacteria	Gammaproteobacteria	Enterobacterales	Erwiniaceae	Pantoea	Pantoea allii
1	root	cellular organisms	Bacteria	Proteobacteria	Betaproteobacteria	Burkholderiales	Oxalobacteraceae	Noviherbaspirillum	Noviherbaspirillum sedimenti
1	root	cellular organisms	Bacteria	Terrabacteria group	Firmicutes	Clostridia	Eubacteriales	Clostridiaceae	Clostridium	Clostridium acidisoli
1	root	cellular organisms	Eukaryota	Sar	Alveolata	Apicomplexa	Conoidasida	Coccidia	Eucoccidiorida	Eimeriorina	Sarcocystidae	Cystoisospora	Cystoisospora suis
1	root	cellular organisms	Bacteria	Proteobacteria	Alphaproteobacteria	Hyphomicrobiales	Rhizobiaceae	Rhizobium/Agrobacterium group	Agrobacterium	Agrobacterium rhizogenes
1	root	cellular organisms	Bacteria	Terrabacteria group	Firmicutes	Bacilli	Bacillales	Bacillales incertae sedis	Desulfuribacillus	Desulfuribacillus alkaliarsenatis
1	root	cellular organisms	Bacteria	Terrabacteria group	Actinobacteria	Actinomycetia	Micrococcales	Microbacteriaceae	Microbacterium	unclassified Microbacterium	Microbacterium sp. LEMMJ01
1	root	cellular organisms	Bacteria	FCB group	Bacteroidetes/Chlorobi group	Ignavibacteriae	Ignavibacteria	Ignavibacteriales	Ignavibacteriaceae	Ignavibacterium	Ignavibacterium album
1	root	Viruses	Duplodnaviria	Heunggongvirae	Uroviricota	Caudoviricetes	Caudovirales	Demerecviridae	Markadamsvirinae	Epseptimavirus	Escherichia virus mar003J3	Escherichia phage vB_Eco_mar003J3
2	root	cellular organisms	Bacteria	PVC group	Planctomycetes	Planctomycetia	unclassified Planctomycetia	Planctomycetia bacterium 21-64-5
3	root	cellular organisms	Bacteria	Proteobacteria	Betaproteobacteria	Neisseriales	Chromobacteriaceae	Aquitalea
1	root	cellular organisms	Bacteria	Terrabacteria group	Firmicutes	Clostridia	Eubacteriales	Oscillospiraceae	Faecalibacterium	unclassified Faecalibacterium	Faecalibacterium sp. JCM 17207
1	root	cellular organisms	Bacteria	Terrabacteria group	Actinobacteria	Actinomycetia	Micrococcales	Microbacteriaceae	Microcella	Microcella alkaliphila
1	root	cellular organisms	Eukaryota	Sar	Alveolata	Dinophyceae	Suessiales	Symbiodiniaceae	Symbiodinium	Symbiodinium microadriaticum
2	root	cellular organisms	Bacteria	Proteobacteria	Gammaproteobacteria	Gammaproteobacteria incertae sedis	Thiohalorhabdus	Thiohalorhabdus denitrificans
1	root	cellular organisms	Bacteria	Terrabacteria group	Firmicutes	Clostridia	Eubacteriales	Oscillospiraceae	Acetivibrio
3	root	cellular organisms	Bacteria	Proteobacteria	Alphaproteobacteria	Hyphomicrobiales	Phyllobacteriaceae	Nitratireductor	Nitratireductor indicus
1	root	cellular organisms	Bacteria	Terrabacteria group	Firmicutes	Tissierellia	Tissierellales	Peptoniphilaceae	Finegoldia	Finegoldia magna
1	root	cellular organisms	Bacteria	Terrabacteria group	Firmicutes	Bacilli	Bacillales	Paenibacillaceae	Paenibacillus	unclassified Paenibacillus	Paenibacillus sp. R14(2021)
1	root	Viruses	Duplodnaviria	Heunggongvirae	Uroviricota	Caudoviricetes	Caudovirales	Podoviridae	Xuquatrovirus	Escherichia virus PTXU04	Escherichia phage PTXU04
1	root	Viruses	Duplodnaviria	Heunggongvirae	Uroviricota	Caudoviricetes	Caudovirales	Podoviridae	Kafunavirus
1	root	cellular organisms	Bacteria	Terrabacteria group	Firmicutes	Negativicutes	Selenomonadales	Sporomusaceae	Sporomusa	Sporomusa malonica
1	root	cellular organisms	Bacteria	Proteobacteria	Alphaproteobacteria	Rhodobacterales	Rhodobacteraceae	unclassified Rhodobacteraceae
2	root	cellular organisms	Bacteria	FCB group	Bacteroidetes/Chlorobi group	Bacteroidetes	Chitinophagia	Chitinophagales	Chitinophagaceae	Taibaiella	Taibaiella helva
1	root	cellular organisms	Bacteria	Proteobacteria	delta/epsilon subdivisions	Deltaproteobacteria	Desulfobacterales	Desulfocapsaceae	Desulfopila	Desulfopila inferna
1	root	cellular organisms	Bacteria	Proteobacteria	Alphaproteobacteria	Emcibacterales	Emcibacteraceae	Paremcibacter	Paremcibacter congregatus
1	root	cellular organisms	Bacteria	Terrabacteria group	Chloroflexi	Ktedonobacteria	Ktedonobacterales	Ktedonobacteraceae	Ktedonobacter	unclassified Ktedonobacter	Ktedonobacter sp. 13_1_40CM_4_52_4
1	root	Viruses	Varidnaviria	Bamfordvirae	Nucleocytoviricota	Megaviricetes	Imitervirales	Mimiviridae	unclassified Mimiviridae	Klosneuvirinae	Klosneuvirus	Bodo saltans virus
2	root	cellular organisms	Bacteria	Proteobacteria	delta/epsilon subdivisions	Epsilonproteobacteria	Campylobacterales	Campylobacteraceae	Campylobacter	Campylobacter ureolyticus
1	root	cellular organisms	Bacteria	Proteobacteria	Alphaproteobacteria	Hyphomicrobiales	Beijerinckiaceae	Pseudochelatococcus	Pseudochelatococcus contaminans
1	root	cellular organisms	Bacteria	Proteobacteria	Alphaproteobacteria	Hyphomicrobiales	Methylobacteriaceae	Methylorubrum	Methylorubrum suomiense
2	root	cellular organisms	Bacteria	Proteobacteria	Betaproteobacteria	Nitrosomonadales	Methylophilaceae	Methylobacillus	Methylobacillus caricis
1	root	cellular organisms	Bacteria	Terrabacteria group	Firmicutes	Bacilli	Bacillales	Bacillaceae	Cytobacillus	Cytobacillus praedii
2	root	cellular organisms	Bacteria	Proteobacteria	Gammaproteobacteria	unclassified Gammaproteobacteria	Gammaproteobacteria bacterium SG8_11
2	root	cellular organisms	Bacteria	Terrabacteria group	Firmicutes	Bacilli	Bacillales	Bacillaceae	Priestia	Priestia taiwanensis
1	root	cellular organisms	Bacteria	Terrabacteria group	Tenericutes	Mollicutes	Entomoplasmatales	Spiroplasmataceae	Spiroplasma	Spiroplasma clarkii
2	root	cellular organisms	Bacteria	Proteobacteria	delta/epsilon subdivisions	Epsilonproteobacteria	Campylobacterales	Sulfurovaceae	Sulfurovum	environmental samples	uncultured Sulfurovum sp.
1	root	cellular organisms	Bacteria	FCB group	Bacteroidetes/Chlorobi group	Bacteroidetes	Flavobacteriia	Flavobacteriales	Flavobacteriaceae	Tamlana	unclassified Tamlana	Tamlana sp. PT2-4
1	root	cellular organisms	Bacteria	Terrabacteria group	Actinobacteria	Actinomycetia	Propionibacteriales	Nocardioidaceae	Nocardioides	unclassified Nocardioides	Nocardioides sp. SYSU D00514
1	root	cellular organisms	Bacteria	Proteobacteria	Gammaproteobacteria	Vibrionales	Vibrionaceae	Vibrio	Vibrio maerlii
1	root	cellular organisms	Bacteria	Proteobacteria	Alphaproteobacteria	Maricaulales	Maricaulaceae	Maricaulis	Maricaulis maris
1	root	cellular organisms	Bacteria	Proteobacteria	Betaproteobacteria	Burkholderiales	Comamonadaceae	Azohydromonas	Azohydromonas aeria
1	root	cellular organisms	Archaea	Euryarchaeota	Stenosarchaea group	Methanomicrobia	Methanosarcinales	Candidatus Methanoperedenaceae	Candidatus Methanoperedens	unclassified Candidatus Methanoperedens
1	root	cellular organisms	Bacteria	FCB group	Bacteroidetes/Chlorobi group	Bacteroidetes	unclassified Bacteroidetes	Bacteroidetes bacterium RIFOXYA12_FULL_40_10
1	root	cellular organisms	Bacteria	Terrabacteria group	Firmicutes	Bacilli	Lactobacillales	Lactobacillaceae	Pediococcus
1	root	cellular organisms	Bacteria	PVC group	Candidatus Omnitrophica	unclassified Candidatus Omnitrophica	Omnitrophica WOR_2 bacterium RIFCSPHIGHO2_02_FULL_68_15
2	root	cellular organisms	Bacteria	Proteobacteria	Betaproteobacteria	Burkholderiales	Burkholderiaceae	Paraburkholderia	unclassified Paraburkholderia	Paraburkholderia sp. UCT31
1	root	cellular organisms	Bacteria	Proteobacteria	Gammaproteobacteria	Moraxellales	Moraxellaceae	Psychrobacter	unclassified Psychrobacter
1	root	cellular organisms	Bacteria	Proteobacteria	Hydrogenophilalia	Hydrogenophilales	unclassified Hydrogenophilales	Hydrogenophilales bacterium CG17_big_fil_post_rev_8_21_14_2_50_63_12
1	root	cellular organisms	Bacteria	Proteobacteria	Betaproteobacteria	Burkholderiales	Comamonadaceae	Ramlibacter	Ramlibacter humi
1	root	cellular organisms	Bacteria	FCB group	Bacteroidetes/Chlorobi group	Bacteroidetes	Bacteroidia	Bacteroidales	Bacteroidaceae	Bacteroides	Bacteroides faecalis
2	root	cellular organisms	Bacteria	PVC group	Planctomycetes	unclassified Planctomycetes	Planctomycetes bacterium GWC2_49_10
1	root	cellular organisms	Bacteria	Proteobacteria	Alphaproteobacteria	Rickettsiales	unclassified Rickettsiales	Rickettsiales bacterium TMED131
3	root	cellular organisms	Bacteria	Bacteria incertae sedis	Bacteria candidate phyla	candidate division TA06	candidate division TA06 bacterium
1	root	cellular organisms	Bacteria	Proteobacteria	Gammaproteobacteria	Pseudomonadales	Pseudomonadaceae	Pseudomonas	Pseudomonas panipatensis
2	root	cellular organisms	Bacteria	Proteobacteria	Alphaproteobacteria	Sphingomonadales	Sphingomonadaceae	Sphingopyxis	unclassified Sphingopyxis
1	root	cellular organisms	Bacteria	Proteobacteria	Gammaproteobacteria	Chromatiales	Chromatiaceae	Thiocapsa	Thiocapsa marina	Thiocapsa marina 5811
1	root	cellular organisms	Bacteria	Proteobacteria	Gammaproteobacteria	Xanthomonadales	Xanthomonadaceae	unclassified Xanthomonadaceae	Xanthomonadaceae bacterium NML07-0707
1	root	cellular organisms	Bacteria	Proteobacteria	Gammaproteobacteria	Xanthomonadales	Xanthomonadaceae	Lysobacter	Lysobacter xinjiangensis
1	root	cellular organisms	Bacteria	FCB group	Bacteroidetes/Chlorobi group	Bacteroidetes	Flavobacteriia	Flavobacteriales	Weeksellaceae	Chryseobacterium group	Kaistella	Candidatus Kaistella beijingensis
1	root	cellular organisms	Bacteria	Aquificae	Aquificae	Desulfurobacteriales	Desulfurobacteriaceae	Balnearium	Balnearium lithotrophicum
1	root	cellular organisms	Bacteria	Proteobacteria	Gammaproteobacteria	Pseudomonadales	Pseudomonadaceae	Pseudomonas	Pseudomonas nitrititolerans
1	root	cellular organisms	Bacteria	Proteobacteria	Alphaproteobacteria	Hyphomicrobiales	Hyphomicrobiaceae	Rhodoplanes	unclassified Rhodoplanes	Rhodoplanes sp. Z2-YC6860
1	root	cellular organisms	Bacteria	Proteobacteria	Gammaproteobacteria	Cellvibrionales	Microbulbiferaceae	Microbulbifer	Microbulbifer hainanensis
1	root	cellular organisms	Bacteria	Terrabacteria group	Actinobacteria	Coriobacteriia	Eggerthellales	Eggerthellaceae	Enteroscipio	Enteroscipio rubneri
2	root	cellular organisms	Bacteria	Proteobacteria	Alphaproteobacteria	Hyphomicrobiales	Beijerinckiaceae	unclassified Beijerinckiaceae	Beijerinckiaceae bacterium
1	root	cellular organisms	Bacteria	Terrabacteria group	Actinobacteria	Actinomycetia	Pseudonocardiales	Pseudonocardiaceae	Actinokineospora	Actinokineospora inagensis
2	root	cellular organisms	Bacteria	Bacteria incertae sedis	Bacteria candidate phyla	Candidatus Aminicenantes	unclassified Aminicenantes	Candidatus Aminicenantes bacterium ADurb.Bin508
1	root	cellular organisms	Bacteria	Proteobacteria	Alphaproteobacteria	Rhodobacterales	Rhodobacteraceae	Tabrizicola	unclassified Tabrizicola	Tabrizicola sp. XJSP
1	root	cellular organisms	Bacteria	Thermotogae	Thermotogae
2	root	cellular organisms	Bacteria	Proteobacteria	delta/epsilon subdivisions	Deltaproteobacteria	Desulfovibrionales	Desulfonatronaceae	Desulfonatronum	Desulfonatronum thiosulfatophilum
1	root	cellular organisms	Bacteria	Proteobacteria	Gammaproteobacteria	Alteromonadales	Alteromonadaceae	Ningiella	Ningiella ruwaisensis
1	root	cellular organisms	Bacteria	Terrabacteria group	Cyanobacteria/Melainabacteria group	Cyanobacteria	Chroococcidiopsidales	Chroococcidiopsidaceae	Chroococcidiopsis	unclassified Chroococcidiopsis	Chroococcidiopsis sp. TS-821
2	root	cellular organisms	Bacteria	Proteobacteria	delta/epsilon subdivisions	Deltaproteobacteria	Myxococcales	Sorangiineae	Polyangiaceae	Polyangium	Polyangium aurulentum
1	root	cellular organisms	Bacteria	Proteobacteria	Alphaproteobacteria	Rhodobacterales	Roseobacteraceae	Epibacterium	Epibacterium ulvae
1	root	cellular organisms	Bacteria	Terrabacteria group	Firmicutes	Bacilli	Lactobacillales	Carnobacteriaceae	Carnobacterium
1	root	cellular organisms	Bacteria	Proteobacteria	Gammaproteobacteria	Xanthomonadales	Xanthomonadaceae	Luteimonas	Luteimonas aestuarii
1	root	cellular organisms	Bacteria	Proteobacteria	Alphaproteobacteria	Sphingomonadales	Sphingomonadaceae	Sphingobium	unclassified Sphingobium	Sphingobium sp. CCH11-B1
1	root	cellular organisms	Bacteria	Nitrospirae	unclassified Nitrospirae	Nitrospirae bacterium RIFCSPLOW2_12_42_9
1	root	cellular organisms	Eukaryota	Opisthokonta	Fungi	Dikarya	Ascomycota	saccharomyceta	Pezizomycotina	Orbiliomycetes	Orbiliales	Orbiliaceae	Dactylellina	Dactylellina cionopaga
1	root	cellular organisms	Bacteria	Terrabacteria group	Firmicutes	Bacilli	Bacillales	Paenibacillaceae	Aneurinibacillus group	Aneurinibacillus	Aneurinibacillus aneurinilyticus
1	root	cellular organisms	Bacteria	Proteobacteria	Gammaproteobacteria	Xanthomonadales	Xanthomonadaceae	Stenotrophomonas	Stenotrophomonas maltophilia group	Stenotrophomonas maltophilia	Stenotrophomonas maltophilia K279a
3	root	cellular organisms	Bacteria	Proteobacteria	Alphaproteobacteria	Rhodobacterales	Rhodobacteraceae	Gemmobacter	Gemmobacter lanyuensis
1	root	cellular organisms	Bacteria	Nitrospinae/Tectomicrobia group	Nitrospinae	Nitrospinia	Nitrospinales	Nitrospinaceae	unclassified Nitrospinaceae	Nitrospinaceae bacterium
1	root	cellular organisms	Bacteria	Proteobacteria	Alphaproteobacteria	Rhodobacterales	Roseobacteraceae	Marivita	unclassified Marivita	Marivita sp. XM-24bin2
1	root	cellular organisms	Bacteria	Terrabacteria group	Actinobacteria	Actinomycetia	Streptosporangiales	Streptosporangiaceae	Sphaerisporangium	Sphaerisporangium krabiense
1	root	cellular organisms	Bacteria	FCB group	Bacteroidetes/Chlorobi group	Rhodothermaeota	Rhodothermia	Rhodothermales	Rubricoccaceae	Rubrivirga	Rubrivirga marina
1	root	cellular organisms	Bacteria	FCB group	Bacteroidetes/Chlorobi group	Bacteroidetes	Flavobacteriia	Flavobacteriales	Weeksellaceae	Chryseobacterium group	Chryseobacterium	unclassified Chryseobacterium	Chryseobacterium sp. LAM-KRS1
1	root	cellular organisms	Bacteria	Terrabacteria group	Firmicutes	Clostridia	Eubacteriales	Lachnospiraceae	Cellulosilyticum	unclassified Cellulosilyticum	Cellulosilyticum sp. I15G10I2
3	root	cellular organisms	Bacteria	Proteobacteria	Betaproteobacteria	Burkholderiales	Alcaligenaceae	Achromobacter	Achromobacter pulmonis
1	root	cellular organisms	Bacteria	FCB group	Bacteroidetes/Chlorobi group	Bacteroidetes	Bacteroidia	Bacteroidales	Bacteroidaceae	unclassified Bacteroidaceae	Bacteroidaceae bacterium HV4-6-C5C
1	root	cellular organisms	Bacteria	FCB group	Bacteroidetes/Chlorobi group	Bacteroidetes	Flavobacteriia	Flavobacteriales	Flavobacteriaceae	Mariniflexile	Mariniflexile maritimum
1	root	cellular organisms	Bacteria	Caldiserica/Cryosericota group	Caldiserica	Caldisericia	Caldisericales	Caldisericaceae	Caldisericum	Caldisericum exile
1	root	cellular organisms	Bacteria	Terrabacteria group	Chloroflexi	Thermoflexia	Thermoflexales	Thermoflexaceae	Thermoflexus
1	root	cellular organisms	Bacteria	Proteobacteria	Alphaproteobacteria	Rhodospirillales	Acetobacteraceae	Komagataeibacter
1	root	cellular organisms	Bacteria	FCB group	Bacteroidetes/Chlorobi group	Chlorobi	Chlorobia	Chlorobiales	Chlorobiaceae	Chlorobaculum	unclassified Chlorobaculum	Chlorobaculum sp. 24CR
1	root	cellular organisms	Bacteria	Proteobacteria	Gammaproteobacteria	Oceanospirillales	Litoricolaceae	Litoricola	Litoricola lipolytica
1	root	cellular organisms	Bacteria	Terrabacteria group	Firmicutes	Erysipelotrichia	Erysipelotrichales	Erysipelotrichaceae	Erysipelothrix	unclassified Erysipelothrix	Erysipelothrix sp. HDW6C
1	root	cellular organisms	Bacteria	PVC group	Planctomycetes	Planctomycetia	Gemmatales	Gemmataceae	Gemmata	Gemmata palustris
2	root	cellular organisms	Bacteria	Proteobacteria	Alphaproteobacteria	Hyphomicrobiales	Pleomorphomonadaceae
2	root	Viruses	Duplodnaviria	Heunggongvirae	Uroviricota	Caudoviricetes	Caudovirales	Siphoviridae	unclassified Siphoviridae	Microbacterium phage Count
2	root	cellular organisms	Bacteria	Proteobacteria	Alphaproteobacteria	Hyphomicrobiales	Devosiaceae	Pelagibacterium	unclassified Pelagibacterium	Pelagibacterium sp. SCN 63-23
1	root	cellular organisms	Bacteria	Deferribacteres	Deferribacteres	Deferribacterales	Deferribacteraceae	Calditerrivibrio	Calditerrivibrio nitroreducens
1	root	Viruses	Duplodnaviria	Heunggongvirae	Uroviricota	Caudoviricetes	Caudovirales	Schitoviridae
1	root	cellular organisms	Bacteria	Terrabacteria group	Actinobacteria	Actinomycetia	Micromonosporales	Micromonosporaceae	Wangella	unclassified Wangella	Wangella sp. NEAU-J3
1	root	cellular organisms	Bacteria	Terrabacteria group	Cyanobacteria/Melainabacteria group	Cyanobacteria	Nostocales	Nostocaceae	Nostoc	unclassified Nostoc	Nostoc sp. TCL26-01
1	root	cellular organisms	Bacteria	Proteobacteria	Alphaproteobacteria	Hyphomicrobiales	Aurantimonadaceae	Martelella	unclassified Martelella	Martelella sp. HB161492
1	root	cellular organisms	Bacteria	Thermotogae	Thermotogae	Thermotogales	Fervidobacteriaceae	Fervidobacterium
1	root	cellular organisms	Bacteria	Aquificae	Aquificae	Aquificales	Aquificaceae	Thermocrinis	unclassified Thermocrinis	Thermocrinis sp. GBS
2	root	cellular organisms	Bacteria	PVC group	Planctomycetes	Candidatus Brocadiia	Candidatus Brocadiales	Candidatus Brocadiaceae	Candidatus Jettenia	unclassified Candidatus Jettenia	Candidatus Jettenia sp.
1	root	cellular organisms	Eukaryota	Opisthokonta	Fungi	Dikarya	Ascomycota	saccharomyceta	Pezizomycotina	leotiomyceta	sordariomyceta	Sordariomycetes	Hypocreomycetidae	Hypocreales	Hypocreaceae	Trichoderma	Trichoderma reesei	Trichoderma reesei RUT C-30
1	root	cellular organisms	Bacteria	Proteobacteria	Gammaproteobacteria	Oceanospirillales	Oceanospirillaceae	Pseudospirillum	Pseudospirillum japonicum
1	root	cellular organisms	Bacteria	PVC group	Verrucomicrobia	Opitutae	Puniceicoccales	Puniceicoccaceae	unclassified Puniceicoccaceae	Puniceicoccaceae bacterium MED-G31
2	root	cellular organisms	Bacteria	Proteobacteria	Alphaproteobacteria	Hyphomicrobiales	Phyllobacteriaceae	Phyllobacterium	Phyllobacterium phragmitis
2	root	cellular organisms	Bacteria	Acidobacteria	unclassified Acidobacteria	Acidobacteria bacterium RIFCSPLOWO2_12_FULL_67_14b
1	root	cellular organisms	Bacteria	FCB group	Bacteroidetes/Chlorobi group	Bacteroidetes	Flavobacteriia	Flavobacteriales	Flavobacteriaceae	Kriegella	Kriegella aquimaris
2	root	cellular organisms	Eukaryota	Opisthokonta	Fungi	Fungi incertae sedis	Mucoromycota	Mucoromycotina	Endogonomycetes	Endogonales	Endogonaceae	Jimgerdemannia	Jimgerdemannia flammicorona
1	root	cellular organisms	Bacteria	Proteobacteria	Betaproteobacteria	Burkholderiales	Alcaligenaceae	Achromobacter	Achromobacter pestifer
2	root	cellular organisms	Bacteria	FCB group	Bacteroidetes/Chlorobi group	Bacteroidetes	Bacteroidia	Marinilabiliales	Prolixibacteraceae
1	root	cellular organisms	Bacteria	FCB group	Bacteroidetes/Chlorobi group	Bacteroidetes	Chitinophagia	Chitinophagales	Chitinophagaceae	Chitinophaga	Chitinophaga solisilvae
2	root	cellular organisms	Bacteria	PVC group	Verrucomicrobia	Verrucomicrobiae	Verrucomicrobiales	Verrucomicrobiaceae	Luteolibacter	Luteolibacter yonseiensis
1	root	cellular organisms	Archaea	Candidatus Thermoplasmatota	Thermoplasmata	Thermoplasmatales	Ferroplasmaceae	Acidiplasma	Acidiplasma aeolicum
1	root	cellular organisms	Bacteria	Terrabacteria group	Firmicutes	Clostridia	Eubacteriales	Clostridiaceae	Clostridium	unclassified Clostridium	Clostridium sp. ATCC BAA-442
1	root	cellular organisms	Bacteria	Proteobacteria	delta/epsilon subdivisions	Deltaproteobacteria	unclassified Deltaproteobacteria	Deltaproteobacteria bacterium HGW-Deltaproteobacteria-23
2	root	cellular organisms	Bacteria	Proteobacteria	Alphaproteobacteria	Hyphomicrobiales	Hyphomicrobiaceae	Methyloceanibacter	Methyloceanibacter methanicus
1	root	cellular organisms	Bacteria	Proteobacteria	Gammaproteobacteria	Xanthomonadales	Xanthomonadaceae	Lysobacter	unclassified Lysobacter	Lysobacter sp. BMK333-48F3
1	root	cellular organisms	Bacteria	Proteobacteria	Alphaproteobacteria	Rhodospirillales	Acetobacteraceae	Roseococcus	Roseococcus microcysteis
2	root	cellular organisms	Bacteria	Bacteria incertae sedis	Bacteria candidate phyla	Patescibacteria group	Microgenomates group	Candidatus Daviesbacteria
1	root	cellular organisms	Bacteria	FCB group	candidate division Zixibacteria	unclassified candidate division Zixibacteria	candidate division Zixibacteria bacterium SM23_73
1	root	cellular organisms	Bacteria	Proteobacteria	Alphaproteobacteria	Sphingomonadales	Sphingomonadaceae	Sphingomonas	Sphingomonas montana
1	root	cellular organisms	Bacteria	Proteobacteria	Gammaproteobacteria	Chromatiales	Ectothiorhodospiraceae	Arhodomonas	unclassified Arhodomonas	Arhodomonas sp. KWT
1	root	cellular organisms	Bacteria	Terrabacteria group	Cyanobacteria/Melainabacteria group	Cyanobacteria	Oscillatoriophycideae	Chroococcales	Aphanothecaceae	Rippkaea	Rippkaea orientalis
1	root	Viruses	Duplodnaviria	Heunggongvirae	Uroviricota	Caudoviricetes	Caudovirales	Schitoviridae	unclassified Schitoviridae
1	root	cellular organisms	Eukaryota	Sar	Rhizaria	Retaria	Foraminifera	Monothalamids	Reticulomyxidae	Reticulomyxa	Reticulomyxa filosa
1	root	cellular organisms	Eukaryota	Rhodophyta	Bangiophyceae	Porphyridiales	Porphyridiaceae	Porphyridium	Porphyridium purpureum
1	root	cellular organisms	Bacteria	Terrabacteria group	Actinobacteria	Actinomycetia	Cryptosporangiales	Cryptosporangiaceae	Cryptosporangium	Cryptosporangium phraense
1	root	cellular organisms	Bacteria	Proteobacteria	Alphaproteobacteria	Hyphomonadales	Hyphomonadaceae	Hyphomonas	Hyphomonas pacifica
3	root	cellular organisms	Bacteria	Terrabacteria group	Firmicutes	Clostridia	Eubacteriales	Eubacteriales incertae sedis	Eubacteriales Family XIII. Incertae Sedis	Bacilliculturomica	Bacilliculturomica massiliensis
1	root	cellular organisms	Bacteria	FCB group	Bacteroidetes/Chlorobi group	Bacteroidetes	unclassified Bacteroidetes	Bacteroidetes bacterium OLB8
2	root	cellular organisms	Bacteria	Proteobacteria	delta/epsilon subdivisions	Deltaproteobacteria	Desulfovibrionales	Desulfovibrionaceae	Desulfovibrio	unclassified Desulfovibrio	Desulfovibrio sp. MES5
1	root	cellular organisms	Bacteria	Terrabacteria group	Firmicutes	Clostridia	Eubacteriales	Clostridiaceae	Clostridium	Clostridium mediterraneense
1	root	cellular organisms	Bacteria	Terrabacteria group	Actinobacteria	Actinomycetia	Corynebacteriales	Mycobacteriaceae	Mycobacterium	Mycobacterium avium complex (MAC)	Mycobacterium avium	Mycobacterium avium subsp. avium	Mycobacterium avium subsp. avium 2285 (R)
1	root	cellular organisms	Bacteria	Bacteria incertae sedis	Bacteria candidate phyla	Patescibacteria group	Parcubacteria group	Candidatus Nomurabacteria	Candidatus Nomurabacteria bacterium GW2011_GWB1_43_7
1	root	cellular organisms	Bacteria	Bacteria incertae sedis	Bacteria candidate phyla	Candidatus Glassbacteria	Candidatus Glassbacteria bacterium RIFCSPLOWO2_12_FULL_58_11
3	root	cellular organisms	Bacteria	Proteobacteria	Betaproteobacteria	Rhodocyclales	Rhodocyclaceae	Aromatoleum	Aromatoleum toluclasticum
1	root	cellular organisms	Bacteria	Terrabacteria group	Actinobacteria	Actinomycetia	Micrococcales	Microbacteriaceae	Microbacterium	Microbacterium foliorum
1	root	cellular organisms	Bacteria	Proteobacteria	Gammaproteobacteria	Chromatiales	Chromatiaceae	Nitrosococcus	Nitrosococcus halophilus	Nitrosococcus halophilus Nc 4
1	root	cellular organisms	Bacteria	Proteobacteria	Alphaproteobacteria	Maricaulales	Maricaulaceae	Maricaulis	Maricaulis parjimensis
1	root	cellular organisms	Bacteria	Proteobacteria	Betaproteobacteria	Burkholderiales	Burkholderiales genera incertae sedis	Aquabacterium	unclassified Aquabacterium	Aquabacterium sp. CECT 9606
1	root	cellular organisms	Bacteria	Terrabacteria group	Actinobacteria	Actinomycetia	Streptomycetales	Streptomycetaceae	Streptomyces	Streptomyces aurantiacus group	Streptomyces tauricus
1	root	cellular organisms	Bacteria	FCB group	Bacteroidetes/Chlorobi group	Bacteroidetes	Flavobacteriia	Flavobacteriales	Flavobacteriaceae	Gramella	Gramella fulva
2	root	cellular organisms	Bacteria	Proteobacteria	Betaproteobacteria	Rhodocyclales	Azonexaceae	Azonexus	unclassified Azonexus	Azonexus sp. R2A-61
1	root	cellular organisms	Bacteria	FCB group	Bacteroidetes/Chlorobi group	Bacteroidetes	Chitinophagia	Chitinophagales	Chitinophagaceae	Ferruginibacter	unclassified Ferruginibacter	Ferruginibacter sp. BO-59
1	root	cellular organisms	Bacteria	Proteobacteria	Alphaproteobacteria	Hyphomicrobiales	Brucellaceae	Falsochrobactrum	Falsochrobactrum ovis
1	root	cellular organisms	Bacteria	FCB group	Bacteroidetes/Chlorobi group	Bacteroidetes	Flavobacteriia	Flavobacteriales	Flavobacteriaceae	Aquimarina	Aquimarina litoralis
1	root	cellular organisms	Bacteria	Terrabacteria group	Firmicutes	Bacilli	Lactobacillales	Streptococcaceae	Streptococcus	Streptococcus suis	Streptococcus suis 98HAH33
1	root	cellular organisms	Bacteria	Proteobacteria	Alphaproteobacteria	Rhodospirillales	unclassified Rhodospirillales	Rhodospirillales bacterium 20-60-12
1	root	cellular organisms	Bacteria	Terrabacteria group	Firmicutes	Clostridia	Koleobacterales	Koleobacteraceae	Koleobacter	Koleobacter methoxysyntrophicus
1	root	cellular organisms	Bacteria	Proteobacteria	Betaproteobacteria	Burkholderiales	Burkholderiales genera incertae sedis	Methylibium
1	root	cellular organisms	Eukaryota	Sar	Alveolata	Apicomplexa	Conoidasida	Coccidia	Eucoccidiorida	Eimeriorina	Cryptosporidiidae	Cryptosporidium	Cryptosporidium ubiquitum
1	root	cellular organisms	Bacteria	Proteobacteria	delta/epsilon subdivisions	Deltaproteobacteria	Desulfobacterales	Desulfobacteraceae	Desulfoluna
1	root	cellular organisms	Bacteria	Terrabacteria group	Cyanobacteria/Melainabacteria group	Cyanobacteria	unclassified Cyanobacteria	Cyanobacteria bacterium QS_8_64_29
1	root	cellular organisms	Bacteria	PVC group	Planctomycetes	Planctomycetia	Planctomycetales	Planctomycetaceae	Symmachiella	Symmachiella dynata
1	root	cellular organisms	Bacteria	FCB group	Bacteroidetes/Chlorobi group	Bacteroidetes	Bacteroidia	Bacteroidales	Porphyromonadaceae	Porphyromonas	Porphyromonas gingivalis
1	root	cellular organisms	Bacteria	FCB group	Bacteroidetes/Chlorobi group	Bacteroidetes	Bacteroidia	Bacteroidales	Bacteroidaceae	Phocaeicola	Phocaeicola dorei
1	root	cellular organisms	Eukaryota	Opisthokonta	Fungi	Dikarya	Ascomycota	saccharomyceta	Pezizomycotina	leotiomyceta	sordariomyceta	Sordariomycetes	Sordariomycetidae	Sordariales	Chaetomiaceae	Chaetomium	Chaetomium globosum
1	root	cellular organisms	Bacteria	Proteobacteria	delta/epsilon subdivisions	Deltaproteobacteria	Desulfuromonadales	Syntrophotaleaceae	Syntrophotalea	Syntrophotalea carbinolica	Syntrophotalea carbinolica DSM 2380
1	root	cellular organisms	Bacteria	Proteobacteria	Betaproteobacteria	Rhodocyclales	Rhodocyclaceae	Aromatoleum	Aromatoleum diolicum
1	root	cellular organisms	Bacteria	Proteobacteria	Alphaproteobacteria	Rhodobacterales	Roseobacteraceae	Leisingera	unclassified Leisingera	Leisingera sp. NJS204
1	root	cellular organisms	Bacteria	Terrabacteria group	Actinobacteria	Actinomycetia	Streptosporangiales	Thermomonosporaceae	Actinomadura	unclassified Actinomadura	Actinomadura sp. GC306
1	root	cellular organisms	Bacteria	Proteobacteria	Alphaproteobacteria	Sphingomonadales	Erythrobacteraceae	Erythrobacter/Porphyrobacter group	Erythrobacter	unclassified Erythrobacter
1	root	cellular organisms	Bacteria	FCB group	Bacteroidetes/Chlorobi group	Bacteroidetes	Cytophagia	Cytophagales	Amoebophilaceae	Candidatus Cardinium	unclassified Candidatus Cardinium	Cardinium endosymbiont of Dermatophagoides farinae
1	root	cellular organisms	Bacteria	Terrabacteria group	Firmicutes	Clostridia	Eubacteriales	Oscillospiraceae	Pygmaiobacter	Pygmaiobacter massiliensis
1	root	Viruses	Duplodnaviria	Heunggongvirae	Uroviricota	Caudoviricetes	Caudovirales	Myoviridae	unclassified Myoviridae	Synechococcus phage ACG-2014h
1	root	cellular organisms	Bacteria	Proteobacteria	Betaproteobacteria	Burkholderiales	Burkholderiales genera incertae sedis	Thiomonas	Thiomonas delicata
1	root	cellular organisms	Bacteria	Proteobacteria	Betaproteobacteria	Burkholderiales	Oxalobacteraceae	Collimonas
1	root	cellular organisms	Bacteria	FCB group	Bacteroidetes/Chlorobi group	Chlorobi	Chlorobia	Chlorobiales	Chlorobiaceae	Chlorobium/Pelodictyon group	Chlorobium	Chlorobium ferrooxidans
1	root	cellular organisms	Bacteria	FCB group	Bacteroidetes/Chlorobi group	Bacteroidetes	Bacteroidia	Bacteroidales	Prevotellaceae	Paraprevotella
1	root	cellular organisms	Bacteria	Terrabacteria group	Firmicutes	Tissierellia	Tissierellales	Peptoniphilaceae	Helcococcus	Helcococcus sueciensis
1	root	cellular organisms	Bacteria	Proteobacteria	Gammaproteobacteria	Alteromonadales	Alteromonadaceae	Glaciecola	Glaciecola amylolytica
1	root	cellular organisms	Bacteria	FCB group	Bacteroidetes/Chlorobi group	Rhodothermaeota	unclassified Rhodothermaeota	Rhodothermaeota bacterium MED-G12
1	root	cellular organisms	Bacteria	Proteobacteria	Gammaproteobacteria	Chromatiales	Ectothiorhodospiraceae	Aquisalimonas	unclassified Aquisalimonas	Aquisalimonas sp. 2447
2	root	cellular organisms	Bacteria	Terrabacteria group	Firmicutes	Clostridia	Eubacteriales	Clostridiaceae	Lutispora	Lutispora thermophila
1	root	cellular organisms	Bacteria	Terrabacteria group	Cyanobacteria/Melainabacteria group	Cyanobacteria	Oscillatoriophycideae	Oscillatoriales	Oscillatoriaceae	Phormidium	unclassified Phormidium	Phormidium sp. FACHB-1136
1	root	cellular organisms	Bacteria	Proteobacteria	Betaproteobacteria	Burkholderiales	Burkholderiaceae	Polynucleobacter	Polynucleobacter necessarius
1	root	cellular organisms	Bacteria	Proteobacteria	Gammaproteobacteria	Gammaproteobacteria incertae sedis	SAR86 cluster	SAR86 cluster bacterium
2	root	cellular organisms	Bacteria	FCB group	Bacteroidetes/Chlorobi group	Bacteroidetes	Cytophagia	Cytophagales	Cyclobacteriaceae	Pleomorphovibrio	Pleomorphovibrio marinus
2	root	cellular organisms	Bacteria	FCB group	Bacteroidetes/Chlorobi group	Bacteroidetes	Flavobacteriia	Flavobacteriales	Schleiferiaceae	Thermaurantimonas	Thermaurantimonas aggregans
1	root	cellular organisms	Bacteria	Terrabacteria group	Firmicutes	Bacilli	Lactobacillales	Lactobacillaceae	Ligilactobacillus	Ligilactobacillus hayakitensis
1	root	cellular organisms	Bacteria	FCB group	Bacteroidetes/Chlorobi group	Bacteroidetes	Bacteroidia	Bacteroidales	Bacteroidaceae	Bacteroides	Bacteroides propionicifaciens
1	root	cellular organisms	Bacteria	Terrabacteria group	Firmicutes	Erysipelotrichia	Erysipelotrichales	Erysipelotrichaceae	Erysipelothrix	unclassified Erysipelothrix	Erysipelothrix sp. 165301687
2	root	cellular organisms	Bacteria	PVC group	Planctomycetes	Planctomycetia	Planctomycetales	Planctomycetaceae	Gimesia	Gimesia aquarii
2	root	cellular organisms	Bacteria	FCB group	Bacteroidetes/Chlorobi group	Bacteroidetes	Bacteroidia	Bacteroidales	Dysgonomonadaceae	Dysgonomonas	Dysgonomonas mossii
1	root	cellular organisms	Bacteria	Proteobacteria	Gammaproteobacteria	Methylococcales	Methylococcaceae	Methylomonas	unclassified Methylomonas	Methylomonas sp. ZR1
1	root	cellular organisms	Bacteria	Proteobacteria	Alphaproteobacteria	Hyphomicrobiales	Rhizobiaceae	Rhizobium/Agrobacterium group	Agrobacterium	unclassified Agrobacterium	Agrobacterium sp. 13-626
1	root	cellular organisms	Bacteria	Terrabacteria group	Firmicutes	Clostridia	Eubacteriales	Clostridiaceae	Clostridium	environmental samples	Clostridium sp. CAG:433
1	root	cellular organisms	Bacteria	Proteobacteria	Betaproteobacteria	Burkholderiales	Burkholderiales genera incertae sedis	Methylibium	unclassified Methylibium
1	root	cellular organisms	Bacteria	Terrabacteria group	Firmicutes	Clostridia	Eubacteriales	Clostridiaceae	Alkaliphilus
1	root	cellular organisms	Bacteria	FCB group	Bacteroidetes/Chlorobi group	Bacteroidetes	Cytophagia	Cytophagales	Spirosomaceae	Dyadobacter	Dyadobacter psychrotolerans
1	root	cellular organisms	Bacteria	FCB group	Bacteroidetes/Chlorobi group	Bacteroidetes	Chitinophagia	Chitinophagales	Chitinophagaceae	Terrimonas	unclassified Terrimonas	Terrimonas sp. NS-102
1	root	cellular organisms	Bacteria	PVC group	Candidatus Omnitrophica	unclassified Candidatus Omnitrophica	Candidatus Omnitrophica bacterium CG11_big_fil_rev_8_21_14_0_20_41_12
2	root	cellular organisms	Bacteria	Proteobacteria	Betaproteobacteria	Burkholderiales	Burkholderiaceae	Caballeronia	Caballeronia novacaledonica
1	root	cellular organisms	Bacteria	Bacteria incertae sedis	Bacteria candidate phyla	candidate division TA06
1	root	cellular organisms	Eukaryota	Opisthokonta	Fungi	Dikarya	Ascomycota	saccharomyceta	Pezizomycotina	leotiomyceta	Eurotiomycetes	Eurotiomycetidae	Eurotiales	Aspergillaceae	Aspergillus	Aspergillus subgen. Nidulantes	Aspergillus sydowii	Aspergillus sydowii CBS 593.65
1	root	cellular organisms	Bacteria	Proteobacteria	Betaproteobacteria	Burkholderiales	Burkholderiaceae	Paraburkholderia	Paraburkholderia podalyriae
2	root	cellular organisms	Bacteria	Proteobacteria	delta/epsilon subdivisions	Deltaproteobacteria	unclassified Deltaproteobacteria	Deltaproteobacteria bacterium HGW-Deltaproteobacteria-9
1	root	cellular organisms	Bacteria	Terrabacteria group	Firmicutes	Bacilli	Bacillales	Paenibacillaceae	Paenibacillus	unclassified Paenibacillus	Paenibacillus sp. Soil522
1	root	cellular organisms	Bacteria	Terrabacteria group	Firmicutes	Clostridia	Eubacteriales	Peptococcaceae	Desulfitobacterium	Desulfitobacterium chlororespirans
1	root	cellular organisms	Bacteria	FCB group	Bacteroidetes/Chlorobi group	Bacteroidetes	Bacteroidia	Bacteroidales	Tannerellaceae	Parabacteroides	unclassified Parabacteroides	Parabacteroides sp. BX2
1	root	cellular organisms	Bacteria	FCB group	Bacteroidetes/Chlorobi group	Bacteroidetes	Sphingobacteriia	Sphingobacteriales	Sphingobacteriaceae	Mucilaginibacter	Mucilaginibacter xinganensis
1	root	cellular organisms	Bacteria	Terrabacteria group	Actinobacteria	Actinomycetia	Streptomycetales	Streptomycetaceae	Streptomyces	Streptomyces cinnamoneus group	Streptomyces cinnamoneus
2	root	cellular organisms	Bacteria	PVC group	Planctomycetes	Planctomycetia	Pirellulales	Pirellulaceae	Roseimaritima	Roseimaritima multifibrata
2	root	cellular organisms	Bacteria	Proteobacteria	delta/epsilon subdivisions	Deltaproteobacteria	Desulfovibrionales	Desulfovibrionaceae	Desulfovibrio	Desulfovibrio cuneatus
1	root	cellular organisms	Bacteria	Proteobacteria	Alphaproteobacteria	Hyphomicrobiales	Stappiaceae	Labrenzia	unclassified Labrenzia
1	root	Viruses	Duplodnaviria	Heunggongvirae	Uroviricota	Caudoviricetes	Caudovirales	Schitoviridae	Rhodovirinae	Aorunvirus	unclassified Aorunvirus	Ruegeria phage vB_RpoP-V14
1	root	cellular organisms	Bacteria	Terrabacteria group	Actinobacteria	Thermoleophilia	Solirubrobacterales	environmental samples	uncultured Solirubrobacterales bacterium
1	root	cellular organisms	Bacteria	Proteobacteria	delta/epsilon subdivisions	Deltaproteobacteria	Myxococcales	Cystobacterineae	Myxococcaceae
4	root	cellular organisms	Bacteria	PVC group	Verrucomicrobia	Opitutae	Opitutales	Opitutaceae	Rariglobus	Rariglobus hedericola
1	root	cellular organisms	Bacteria	Proteobacteria	Betaproteobacteria	Burkholderiales	Comamonadaceae	Curvibacter	unclassified Curvibacter	Curvibacter sp. PAE-UM
1	root	cellular organisms	Bacteria	Terrabacteria group	Firmicutes	Negativicutes	Veillonellales	Veillonellaceae	Megasphaera	Megasphaera hominis
1	root	cellular organisms	Bacteria	FCB group	Bacteroidetes/Chlorobi group	Bacteroidetes	Cytophagia	Cytophagales	Spirosomaceae	Emticicia	unclassified Emticicia	Emticicia sp. BO119
1	root	cellular organisms	Bacteria	Bacteria incertae sedis	Bacteria candidate phyla	candidate division CPR3
2	root	cellular organisms	Bacteria	FCB group	Bacteroidetes/Chlorobi group	Bacteroidetes	Sphingobacteriia	Sphingobacteriales
1	root	cellular organisms	Bacteria	Proteobacteria	Alphaproteobacteria	unclassified Alphaproteobacteria	Alphaproteobacteria bacterium 65-37
2	root	cellular organisms	Bacteria	Proteobacteria	Gammaproteobacteria	Pseudomonadales	Pseudomonadaceae	Pseudomonas	unclassified Pseudomonas	Pseudomonas sp. PI1
1	root	cellular organisms	Bacteria	FCB group	Bacteroidetes/Chlorobi group	Bacteroidetes	Flavobacteriia	Flavobacteriales	Flavobacteriaceae	Ulvibacter	unclassified Ulvibacter	Ulvibacter sp. MAR_2010_11
1	root	cellular organisms	Bacteria	Proteobacteria	Betaproteobacteria	Burkholderiales	Burkholderiales genera incertae sedis	Rhizobacter
1	root	cellular organisms	Bacteria	Proteobacteria	Betaproteobacteria	unclassified Betaproteobacteria	Betaproteobacteria bacterium HGW-Betaproteobacteria-19
4	root	cellular organisms	Bacteria	Proteobacteria	Alphaproteobacteria	Rhodospirillales	Acetobacteraceae	Roseomonas	unclassified Roseomonas	Roseomonas sp. CECT 9278
1	root	cellular organisms	Bacteria	Proteobacteria	Alphaproteobacteria	Hyphomicrobiales	Bradyrhizobiaceae
1	root	cellular organisms	Bacteria	Terrabacteria group	Cyanobacteria/Melainabacteria group	Cyanobacteria	Thermostichales	Thermostichaceae	Thermostichus	Thermostichus lividus
1	root	cellular organisms	Bacteria	Proteobacteria	Gammaproteobacteria	Cellvibrionales	Cellvibrionaceae	Exilibacterium	Exilibacterium tricleocarpae
2	root	cellular organisms	Bacteria	FCB group	Fibrobacteres	Fibrobacteria	Fibrobacterales	Fibrobacteraceae	Fibrobacter	unclassified Fibrobacter	Fibrobacter sp. UWB1
1	root	cellular organisms	Bacteria	Terrabacteria group	Actinobacteria	Actinomycetia	Propionibacteriales	Nocardioidaceae	Nocardioides	Nocardioides albertanoniae
1	root	cellular organisms	Bacteria	Terrabacteria group	Actinobacteria	Actinomycetia	Corynebacteriales	Corynebacteriaceae	Corynebacterium	Corynebacterium lowii
2	root	cellular organisms	Eukaryota	Rhodophyta	Bangiophyceae	Bangiales	Bangiaceae	Porphyra	Porphyra umbilicalis
1	root	cellular organisms	Bacteria	Terrabacteria group	Firmicutes	Clostridia	Eubacteriales	Clostridiaceae	Clostridium	Clostridium niameyense
1	root	cellular organisms	Bacteria	Terrabacteria group	Actinobacteria	Actinomycetia	Micrococcales	Promicromonosporaceae	Promicromonospora	unclassified Promicromonospora	Promicromonospora sp. AC04
2	root	cellular organisms	Bacteria	Terrabacteria group	Firmicutes	Bacilli	Lactobacillales	Lactobacillaceae	Pediococcus	Pediococcus acidilactici group	Pediococcus acidilactici
1	root	cellular organisms	Bacteria	Terrabacteria group	Firmicutes	Clostridia	Eubacteriales	Peptostreptococcaceae	Peptostreptococcaceae incertae sedis	[Clostridium] thermoalcaliphilum
1	root	cellular organisms	Bacteria	Proteobacteria	delta/epsilon subdivisions	Deltaproteobacteria	Desulfobacterales	Desulfobacteraceae	Desulfoluna	unclassified Desulfoluna	Desulfoluna sp. ASN36
1	root	cellular organisms	Bacteria	Terrabacteria group	Actinobacteria	Actinomycetia	Pseudonocardiales	Pseudonocardiaceae	Saccharopolyspora	unclassified Saccharopolyspora	Saccharopolyspora sp. HNM0983
1	root	cellular organisms	Bacteria	FCB group	Bacteroidetes/Chlorobi group	Chlorobi	Chlorobia	Chlorobiales	Chlorobiaceae	Chlorobium/Pelodictyon group	Chlorobium	unclassified Chlorobium	Chlorobium sp. KB01
1	root	cellular organisms	Bacteria	Proteobacteria	Betaproteobacteria	Burkholderiales	Alcaligenaceae	Alcaligenes	Alcaligenes ammonioxydans
4	root	cellular organisms	Bacteria	Terrabacteria group	Firmicutes	Bacilli	Lactobacillales	Enterococcaceae	Enterococcus
1	root	cellular organisms	Bacteria	Terrabacteria group	Actinobacteria	Actinomycetia	Propionibacteriales	Nocardioidaceae	Nocardioides	unclassified Nocardioides	Nocardioides sp. cx-169
1	root	cellular organisms	Bacteria	Proteobacteria	Alphaproteobacteria	Rhodobacterales	Roseobacteraceae	Yangia
1	root	cellular organisms	Bacteria	Proteobacteria	Betaproteobacteria	Neisseriales	Neisseriaceae	Chitinolyticbacter	Chitinolyticbacter meiyuanensis
1	root	cellular organisms	Bacteria	FCB group	Bacteroidetes/Chlorobi group	Bacteroidetes	Cytophagia	Cytophagales	Cyclobacteriaceae	Algoriphagus	Algoriphagus formosus
1	root	cellular organisms	Bacteria	Proteobacteria	Gammaproteobacteria	unclassified Gammaproteobacteria	Gammaproteobacteria bacterium TMED36
1	root	cellular organisms	Bacteria	Proteobacteria	Gammaproteobacteria	unclassified Gammaproteobacteria	Gammaproteobacteria bacterium RBG_16_57_12
1	root	cellular organisms	Bacteria	Bacteria incertae sedis	Bacteria candidate phyla	candidate division KD3-62	candidate division KD3-62 bacterium DG_56
3	root	cellular organisms	Archaea	TACK group	Thaumarchaeota	Nitrosopumilales	unclassified Nitrosopumilales	Nitrosopumilales archaeon
1	root	cellular organisms	Bacteria	Proteobacteria	Alphaproteobacteria	Magnetococcales	Magnetococcaceae	Magnetococcus	Magnetococcus marinus
2	root	cellular organisms	Bacteria	Proteobacteria	Alphaproteobacteria	Hyphomicrobiales	Phyllobacteriaceae	Mesorhizobium	Mesorhizobium qingshengii
1	root	cellular organisms	Bacteria	Terrabacteria group	Cyanobacteria/Melainabacteria group	Cyanobacteria	unclassified Cyanobacteria	Cyanobacteria bacterium 13_1_40CM_2_61_4
2	root	cellular organisms	Bacteria	Proteobacteria	Gammaproteobacteria	Chromatiales	Chromatiaceae	Halochromatium
2	root	cellular organisms	Bacteria	Acidobacteria	Acidobacteriia	Bryobacterales	Solibacteraceae	Candidatus Sulfopaludibacter	unclassified Candidatus Sulfopaludibacter	Candidatus Sulfopaludibacter sp. SbA4
1	root	cellular organisms	Bacteria	Bacteria incertae sedis	Bacteria candidate phyla	Patescibacteria group	Parcubacteria group	unclassified Parcubacteria group	Parcubacteria group bacterium GW2011_GWA2_47_16
1	root	cellular organisms	Bacteria	Proteobacteria	Alphaproteobacteria	Rhodospirillales	Acetobacteraceae	Acidocella	unclassified Acidocella	Acidocella sp. C78
1	root	cellular organisms	Bacteria	Terrabacteria group	Actinobacteria	Actinomycetia	Propionibacteriales	Nocardioidaceae	Nocardioides	Nocardioides rotundus
2	root	cellular organisms	Bacteria	Terrabacteria group	Actinobacteria	Actinomycetia	Propionibacteriales	Propionibacteriaceae
3	root	cellular organisms	Bacteria	Proteobacteria	Alphaproteobacteria	Hyphomicrobiales	Rhodovibrionaceae	Tistlia	Tistlia consotensis
1	root	cellular organisms	Bacteria	FCB group	Bacteroidetes/Chlorobi group	Bacteroidetes	Chitinophagia	Chitinophagales	Chitinophagaceae	Flavihumibacter	unclassified Flavihumibacter	Flavihumibacter sp. IMCC34838
1	root	cellular organisms	Bacteria	Terrabacteria group	Firmicutes	Clostridia	Thermoanaerobacterales	Thermoanaerobacteraceae	Caldanaerobius	Caldanaerobius polysaccharolyticus
1	root	cellular organisms	Bacteria	Terrabacteria group	Firmicutes	Negativicutes	Selenomonadales	Sporomusaceae	Sporomusa	Sporomusa ovata
1	root	cellular organisms	Bacteria	Proteobacteria	Gammaproteobacteria	Moraxellales	Moraxellaceae	Acinetobacter	unclassified Acinetobacter	Acinetobacter sp. AM
1	root	cellular organisms	Bacteria	Terrabacteria group	Firmicutes	Bacilli	Bacillales	Paenibacillaceae	Paenibacillus	Paenibacillus montanisoli
1	root	cellular organisms	Bacteria	Proteobacteria	delta/epsilon subdivisions	Deltaproteobacteria	unclassified Deltaproteobacteria	Deltaproteobacteria bacterium HGW-Deltaproteobacteria-22
1	root	cellular organisms	Bacteria	Terrabacteria group	Firmicutes	Clostridia	Eubacteriales	Clostridiaceae	Alkaliphilus	Alkaliphilus hydrothermalis
3	root	cellular organisms	Bacteria	Proteobacteria	Betaproteobacteria	Burkholderiales	Burkholderiaceae	Paraburkholderia
3	root	cellular organisms	Eukaryota	Opisthokonta	Fungi	Fungi incertae sedis	Mucoromycota	Mucoromycotina	Mucoromycetes	Mucorales	Mucorineae	Rhizopodaceae	Rhizopus	Rhizopus arrhizus
2	root	cellular organisms	Bacteria	Proteobacteria	Betaproteobacteria	Burkholderiales	Comamonadaceae	Ramlibacter	Ramlibacter lithotrophicus
1	root	cellular organisms	Bacteria	Proteobacteria	Alphaproteobacteria	unclassified Alphaproteobacteria	Alphaproteobacteria bacterium MarineAlpha11_Bin1
1	root	cellular organisms	Bacteria	Proteobacteria	Gammaproteobacteria	Enterobacterales	Hafniaceae	Hafnia	Hafnia alvei
1	root	cellular organisms	Bacteria	Proteobacteria	Betaproteobacteria	Nitrosomonadales	Sterolibacteriaceae	Sulfuritalea	Sulfuritalea hydrogenivorans	Sulfuritalea hydrogenivorans sk43H
2	root	cellular organisms	Bacteria	Proteobacteria	Betaproteobacteria	Burkholderiales	Burkholderiaceae	Burkholderia	Burkholderia cepacia complex	Burkholderia stagnalis
1	root	cellular organisms	Bacteria	Proteobacteria	Gammaproteobacteria	Enterobacterales	Enterobacteriaceae	Cedecea	Cedecea davisae
1	root	cellular organisms	Bacteria	Terrabacteria group	Actinobacteria	Actinomycetia	Streptomycetales	Streptomycetaceae	Streptomyces	unclassified Streptomyces	Streptomyces sp. ZL-24
2	root	cellular organisms	Bacteria	Proteobacteria	Gammaproteobacteria	Pseudomonadales	Marinobacteraceae	Marinobacter	unclassified Marinobacter
2	root	cellular organisms	Bacteria	Proteobacteria	Gammaproteobacteria	Chromatiales	Chromatiaceae	Marichromatium	Marichromatium bheemlicum
1	root	cellular organisms	Bacteria	Terrabacteria group	Actinobacteria	Actinomycetia	Streptosporangiales	Thermomonosporaceae	Actinomadura	Actinomadura alba
1	root	cellular organisms	Eukaryota	Opisthokonta	Fungi	Dikarya	Ascomycota	saccharomyceta	Pezizomycotina	leotiomyceta	Eurotiomycetes	Eurotiomycetidae	Onygenales	Arthrodermataceae	Trichophyton	Trichophyton verrucosum	Trichophyton verrucosum HKI 0517
1	root	cellular organisms	Bacteria	unclassified Bacteria	bacterium BMS3Abin07
1	root	cellular organisms	Bacteria	Terrabacteria group	Actinobacteria	Actinomycetia	Pseudonocardiales	Pseudonocardiaceae	Saccharopolyspora	Saccharopolyspora hirsuta
1	root	cellular organisms	Bacteria	Proteobacteria	Gammaproteobacteria	Oceanospirillales	Halomonadaceae	Chromohalobacter	Chromohalobacter canadensis
1	root	cellular organisms	Bacteria	Proteobacteria	Betaproteobacteria	Nitrosomonadales	Methylophilaceae	Methylobacillus	Methylobacillus rhizosphaerae
1	root	cellular organisms	Bacteria	Synergistetes	Synergistia	Synergistales	Synergistaceae	Thermovirga	Thermovirga lienii
1	root	cellular organisms	Bacteria	Terrabacteria group	Tenericutes	Mollicutes	Mycoplasmatales	Mycoplasmataceae	Mycoplasma	environmental samples	Mycoplasma sp. CAG:611
1	root	cellular organisms	Bacteria	FCB group	Bacteroidetes/Chlorobi group	Bacteroidetes	Chitinophagia	Chitinophagales	Chitinophagaceae	Niabella
1	root	cellular organisms	Bacteria	Terrabacteria group	Actinobacteria	Actinomycetia	Micrococcales	Microbacteriaceae	Gulosibacter	Gulosibacter bifidus
2	root	cellular organisms	Bacteria	Proteobacteria	delta/epsilon subdivisions	Deltaproteobacteria	Syntrophales	Syntrophaceae	Syntrophus	Syntrophus aciditrophicus
1	root	cellular organisms	Bacteria	Synergistetes	unclassified Synergistetes	Synergistetes bacterium
2	root	cellular organisms	Bacteria	Terrabacteria group	Actinobacteria	Actinomycetia	Corynebacteriales	Mycobacteriaceae	Mycobacteroides	Mycobacteroides abscessus
1	root	cellular organisms	Bacteria	FCB group	Bacteroidetes/Chlorobi group	Bacteroidetes	Flavobacteriia	Flavobacteriales	Flavobacteriaceae	Polaribacter	unclassified Polaribacter	Polaribacter sp. IC073
1	root	cellular organisms	Bacteria	Terrabacteria group	Firmicutes	Clostridia	Eubacteriales	Peptococcaceae	Desulfofundulus	Desulfofundulus salinum
1	root	cellular organisms	Bacteria	Proteobacteria	Gammaproteobacteria	Oceanospirillales	Oceanospirillaceae	Marinomonas	Marinomonas ostreistagni
1	root	cellular organisms	Bacteria	Proteobacteria	Alphaproteobacteria	Rhodobacterales	Rhodobacteraceae	Paracoccus	unclassified Paracoccus (in: Bacteria)	Paracoccus sp. M683
1	root	cellular organisms	Bacteria	Terrabacteria group	Firmicutes	Bacilli	Lactobacillales	Carnobacteriaceae	Allofustis	Allofustis seminis
1	root	cellular organisms	Bacteria	Proteobacteria	Gammaproteobacteria	Pseudomonadales	Ventosimonadaceae	Ventosimonas	Ventosimonas gracilis
1	root	cellular organisms	Bacteria	Synergistetes	Synergistia	Synergistales	Synergistaceae	Acetomicrobium	Acetomicrobium flavidum
1	root	cellular organisms	Bacteria	Terrabacteria group	Cyanobacteria/Melainabacteria group	Cyanobacteria	unclassified Cyanobacteria	Cyanobacteria bacterium J055
1	root	cellular organisms	Bacteria	Proteobacteria	Alphaproteobacteria	Rhodobacterales	Roseobacteraceae	Ruegeria	unclassified Ruegeria	Ruegeria sp. TM1040
1	root	cellular organisms	Bacteria	Proteobacteria	delta/epsilon subdivisions	Deltaproteobacteria	unclassified Deltaproteobacteria	Deltaproteobacteria bacterium RIFOXYA12_FULL_61_11
1	root	cellular organisms	Bacteria	Proteobacteria	Gammaproteobacteria	Oceanospirillales	Oceanospirillaceae	Nitrincola	Nitrincola schmidtii
1	root	cellular organisms	Bacteria	Terrabacteria group	Actinobacteria	Actinomycetia	Micrococcales	Microbacteriaceae	Microbacterium	unclassified Microbacterium	Microbacterium sp. YMB-B2
1	root	cellular organisms	Eukaryota	Opisthokonta	Fungi	Dikarya	Basidiomycota	Agaricomycotina	Dacrymycetes	Dacrymycetales	Dacrymycetaceae	Dacryopinax	Dacryopinax primogenitus
2	root	cellular organisms	Bacteria	Terrabacteria group	Firmicutes	Erysipelotrichia	Erysipelotrichales	Erysipelotrichaceae	Absicoccus	Absicoccus porci
5	root	cellular organisms	Bacteria	FCB group	Bacteroidetes/Chlorobi group	Bacteroidetes	Bacteroidia	Bacteroidales	Bacteroidaceae	Bacteroides	unclassified Bacteroides
1	root	cellular organisms	Bacteria	Proteobacteria	Gammaproteobacteria	Oceanospirillales	Oceanospirillaceae	Marinobacterium	Marinobacterium zhoushanense
1	root	cellular organisms	Bacteria	Proteobacteria	Alphaproteobacteria	Sphingomonadales	Sphingomonadaceae	Sphingomicrobium	Sphingomicrobium lutaoense
2	root	cellular organisms	Eukaryota	Opisthokonta	Fungi	Fungi incertae sedis	Mucoromycota	Mortierellomycotina	Mortierellomycetes	Mortierellales	Mortierellaceae	Podila	Podila humilis
1	root	cellular organisms	Bacteria	FCB group	Bacteroidetes/Chlorobi group	Bacteroidetes	Flavobacteriia	Flavobacteriales	Flavobacteriaceae	Muricauda	Muricauda olearia
3	root	cellular organisms	Bacteria	Proteobacteria	Betaproteobacteria	Neisseriales	Neisseriaceae	Neisseria	Neisseria canis
1	root	cellular organisms	Eukaryota	Sar	Stramenopiles	Oomycota	Peronosporales	Peronosporaceae	Phytophthora	Phytophthora infestans
2	root	cellular organisms	Bacteria	Proteobacteria	Betaproteobacteria	Burkholderiales	Oxalobacteraceae	Lacisediminimonas	Lacisediminimonas profundi
2	root	cellular organisms	Bacteria	Proteobacteria	Alphaproteobacteria	Rhodospirillales	Acetobacteraceae	Roseococcus	unclassified Roseococcus	Roseococcus sp. XZZS9
1	root	cellular organisms	Bacteria	FCB group	Bacteroidetes/Chlorobi group	Bacteroidetes	Cytophagia	Cytophagales	Spirosomaceae	Dyadobacter	Dyadobacter alkalitolerans
3	root	Viruses	Duplodnaviria	Heunggongvirae	Uroviricota	Caudoviricetes	Caudovirales	Myoviridae	unclassified Myoviridae	Myoviridae sp. ctRRy11
1	root	cellular organisms	Bacteria	Proteobacteria	delta/epsilon subdivisions	Deltaproteobacteria	Desulfovibrionales
1	root	cellular organisms	Bacteria	Proteobacteria	Zetaproteobacteria	unclassified Zetaproteobacteria	Zetaproteobacteria bacterium CG2_30_59_37
1	root	cellular organisms	Bacteria	Terrabacteria group	Firmicutes	Bacilli	Bacillales	Alicyclobacillaceae
1	root	cellular organisms	Bacteria	FCB group	Bacteroidetes/Chlorobi group	Bacteroidetes	Flavobacteriia	Flavobacteriales	Flavobacteriaceae	Robiginitalea	Robiginitalea myxolifaciens
1	root	cellular organisms	Bacteria	Terrabacteria group	Firmicutes	Clostridia	Eubacteriales	Lachnospiraceae	Lachnotalea	Lachnotalea glycerini
1	root	cellular organisms	Bacteria	Proteobacteria	Alphaproteobacteria	Hyphomicrobiales	Phyllobacteriaceae	Hoeflea
1	root	cellular organisms	Bacteria	Terrabacteria group	Firmicutes	Negativicutes	Acidaminococcales	Acidaminococcaceae	Phascolarctobacterium
3	root	cellular organisms	Bacteria	FCB group	Bacteroidetes/Chlorobi group	Bacteroidetes	Bacteroidia	Bacteroidales	Dysgonomonadaceae	Dysgonomonas	unclassified Dysgonomonas	Dysgonomonas sp. 520
2	root	cellular organisms	Bacteria	Proteobacteria	Alphaproteobacteria	Hyphomicrobiales	Phyllobacteriaceae	Aquamicrobium	Aquamicrobium lusatiense
1	root	Viruses	Duplodnaviria	Heunggongvirae	Uroviricota	Caudoviricetes	Caudovirales	Myoviridae	Tegunavirus
1	root	cellular organisms	Bacteria	FCB group	Bacteroidetes/Chlorobi group	Bacteroidetes	Cytophagia	Cytophagales	Cyclobacteriaceae	Belliella	unclassified Belliella	Belliella sp. DSM 111904
1	root	cellular organisms	Bacteria	Terrabacteria group	Actinobacteria	Actinomycetia	Micromonosporales	Micromonosporaceae	Rhizocola	Rhizocola hellebori
1	root	cellular organisms	Bacteria	Acidobacteria	Blastocatellia	Chloracidobacterium	Chloracidobacterium aggregatum
1	root	cellular organisms	Bacteria	Proteobacteria	Gammaproteobacteria	Pseudomonadales	Pseudomonadaceae	Pseudomonas	Pseudomonas psychrotolerans
1	root	cellular organisms	Eukaryota	Opisthokonta	Fungi	Dikarya	Ascomycota	saccharomyceta	Pezizomycotina	leotiomyceta	dothideomyceta	Dothideomycetes	Dothideomycetes incertae sedis	Zopfiaceae	Zopfia	Zopfia rhizophila	Zopfia rhizophila CBS 207.26
1	root	cellular organisms	Bacteria	Proteobacteria	Gammaproteobacteria	Oceanospirillales	Oceanospirillaceae	Oleispira	Oleispira antarctica
2	root	cellular organisms	Bacteria	Proteobacteria	Betaproteobacteria	Neisseriales	Neisseriaceae	Crenobacter	Crenobacter luteus
1	root	cellular organisms	Bacteria	Proteobacteria	Betaproteobacteria	Nitrosomonadales	Nitrosomonadaceae	Nitrosovibrio	Nitrosovibrio tenuis
1	root	cellular organisms	Bacteria	Terrabacteria group	Firmicutes	Clostridia	Eubacteriales	Peptococcaceae	Desulfocucumis	Desulfocucumis palustris
2	root	Viruses	Duplodnaviria	Heunggongvirae	Uroviricota	Caudoviricetes	Caudovirales	Myoviridae	unclassified Myoviridae	Vibrio phage vB_VcorM_GR11A
1	root	cellular organisms	Bacteria	Acidobacteria	Thermoanaerobaculia	Thermoanaerobaculales	Thermoanaerobaculaceae	Thermoanaerobaculum	Thermoanaerobaculum aquaticum
2	root	cellular organisms	Bacteria	Proteobacteria	Alphaproteobacteria	Hyphomicrobiales	Boseaceae	Bosea	unclassified Bosea	Bosea sp. 12-68-7
2	root	cellular organisms	Bacteria	Proteobacteria	Gammaproteobacteria	Enterobacterales	Morganellaceae	Providencia	Providencia rettgeri
1	root	cellular organisms	Bacteria	Nitrospirae	Nitrospira	Nitrospirales	Nitrospiraceae	Nitrospira	Candidatus Nitrospira kreftii
1	root	cellular organisms	Bacteria	Proteobacteria	Gammaproteobacteria	Moraxellales	Moraxellaceae	Acinetobacter	unclassified Acinetobacter	Acinetobacter sp. WCHAc060033
1	root	cellular organisms	Bacteria	Terrabacteria group	Firmicutes	Bacilli	Bacillales	Listeriaceae	Listeria	Listeria ivanovii
1	root	cellular organisms	Bacteria	FCB group	Fibrobacteres	Chitinispirillia	Chitinispirillales	Chitinispirillaceae	Chitinispirillum	Chitinispirillum alkaliphilum
1	root	cellular organisms	Bacteria	FCB group	Bacteroidetes/Chlorobi group	Bacteroidetes	Flavobacteriia	Flavobacteriales	Cryomorphaceae	unclassified Cryomorphaceae	Cryomorphaceae bacterium BACL18 MAG-120924-bin36
1	root	cellular organisms	Bacteria	Proteobacteria	Alphaproteobacteria	Sphingomonadales	Sphingomonadaceae	Sphingopyxis	unclassified Sphingopyxis	Sphingopyxis sp. FBM22
1	root	cellular organisms	Bacteria	Terrabacteria group	Firmicutes	Bacilli	Bacillales	Bacillaceae	Lysinibacillus	unclassified Lysinibacillus	Lysinibacillus sp. JNUCC-52
2	root	cellular organisms	Bacteria	Proteobacteria	Gammaproteobacteria	Enterobacterales	Morganellaceae	Xenorhabdus	Xenorhabdus miraniensis
1	root	cellular organisms	Bacteria	FCB group	Bacteroidetes/Chlorobi group	Bacteroidetes	Flavobacteriia	Flavobacteriales	Weeksellaceae	Apibacter	Apibacter muscae
1	root	cellular organisms	Bacteria	Proteobacteria	Alphaproteobacteria	Sphingomonadales	Sphingomonadaceae	Sphingomonas	unclassified Sphingomonas	Sphingomonas sp. HDW15A
2	root	cellular organisms	Bacteria	Terrabacteria group	Actinobacteria	Actinomycetia	Micrococcales	Cellulomonadaceae	Cellulomonas	unclassified Cellulomonas	Cellulomonas sp. JZ18
2	root	cellular organisms	Bacteria	Proteobacteria	delta/epsilon subdivisions	Deltaproteobacteria	Myxococcales	Cystobacterineae	Archangiaceae	Stigmatella	Stigmatella aurantiaca
1	root	cellular organisms	Bacteria	Proteobacteria	Alphaproteobacteria	Rhodobacterales	Rhodobacteraceae	Rhodosalinus	Rhodosalinus halophilus
1	root	cellular organisms	Bacteria	FCB group	Bacteroidetes/Chlorobi group	Bacteroidetes	Chitinophagia	Chitinophagales	Chitinophagaceae	Sediminibacterium	Sediminibacterium magnilacihabitans
1	root	cellular organisms	Bacteria	Proteobacteria	Alphaproteobacteria	Rhodospirillales	Azospirillaceae	Skermanella	unclassified Skermanella	Skermanella sp. TT6
2	root	cellular organisms	Bacteria	Proteobacteria	Alphaproteobacteria	Rhodobacterales	Rhodobacteraceae	Sinirhodobacter
1	root	cellular organisms	Bacteria	Terrabacteria group	Firmicutes	Clostridia	Eubacteriales	Lachnospiraceae	Blautia	environmental samples	uncultured Blautia sp.
1	root	cellular organisms	Bacteria	Proteobacteria	Gammaproteobacteria	Moraxellales	Moraxellaceae	Acinetobacter	Acinetobacter calcoaceticus/baumannii complex	Acinetobacter nosocomialis	Acinetobacter nosocomialis 28F
2	root	cellular organisms	Bacteria	Proteobacteria	Betaproteobacteria	Burkholderiales	Comamonadaceae	Acidovorax	Acidovorax delafieldii
1	root	cellular organisms	Bacteria	Terrabacteria group	Firmicutes	Clostridia	Halanaerobiales	Halobacteroidaceae	Sporohalobacter	Sporohalobacter salinus
1	root	cellular organisms	Bacteria	Proteobacteria	Alphaproteobacteria	Hyphomicrobiales	Methylobacteriaceae	Microvirga	unclassified Microvirga	Microvirga sp. BT689
4	root	cellular organisms	Bacteria	Bacteria incertae sedis	Bacteria candidate phyla	candidate division WWE3	environmental samples	uncultured candidate division WWE3 bacterium EJ0ADIGA11YD11
1	root	cellular organisms	Bacteria	Proteobacteria	Betaproteobacteria	Burkholderiales	Burkholderiaceae	Paraburkholderia	unclassified Paraburkholderia	Paraburkholderia sp. Ac-20347
1	root	cellular organisms	Eukaryota	Opisthokonta	Fungi	Dikarya	Basidiomycota	Agaricomycotina	Agaricomycetes	Agaricomycetidae	Agaricales	Mycenaceae	Mycena	Mycena chlorophos
1	root	cellular organisms	Bacteria	Proteobacteria	Betaproteobacteria	Burkholderiales	Comamonadaceae	Limnohabitans	unclassified Limnohabitans	Limnohabitans sp. MMS-10A-192
1	root	cellular organisms	Bacteria	Terrabacteria group	Chloroflexi	unclassified Chloroflexi	Chloroflexi bacterium RBG_16_50_11
1	root	cellular organisms	Bacteria	Proteobacteria	Betaproteobacteria	Neisseriales	Neisseriaceae	Neisseria	unclassified Neisseria	Neisseria sp. oral taxon 020	Neisseria sp. oral taxon 020 str. F0370
1	root	cellular organisms	Bacteria	Proteobacteria	Alphaproteobacteria	Hyphomicrobiales	Tepidamorphaceae	Lutibaculum	Lutibaculum baratangense
2	root	cellular organisms	Bacteria	Proteobacteria	Betaproteobacteria	Burkholderiales	Burkholderiaceae	Paraburkholderia	Paraburkholderia fungorum
1	root	cellular organisms	Bacteria	Proteobacteria	Alphaproteobacteria	Rhodobacterales	Rhodobacteraceae	Oceaniglobus	Oceaniglobus trochenteri
3	root	cellular organisms	Bacteria	Proteobacteria	Betaproteobacteria	Nitrosomonadales	Thiobacillaceae	Thiobacillus	unclassified Thiobacillus	Thiobacillus sp. GWE1_62_9
1	root	cellular organisms	Bacteria	Proteobacteria	Gammaproteobacteria	Enterobacterales	Erwiniaceae	Buchnera	Buchnera aphidicola
1	root	cellular organisms	Bacteria	Proteobacteria	Betaproteobacteria	unclassified Betaproteobacteria	Betaproteobacteria bacterium 13_1_40CM_4_64_4
1	root	cellular organisms	Bacteria	Proteobacteria	Gammaproteobacteria	Moraxellales	Moraxellaceae	Acinetobacter	Acinetobacter gerneri	Acinetobacter gerneri DSM 14967 = CIP 107464 = MTCC 9824
1	root	cellular organisms	Bacteria	Proteobacteria	Alphaproteobacteria	Hyphomicrobiales	Phyllobacteriaceae	Aminobacter
1	root	cellular organisms	Bacteria	Proteobacteria	Alphaproteobacteria	Sphingomonadales	Sphingomonadaceae	Sphingomonas	unclassified Sphingomonas	Sphingomonas sp. CDS-1
1	root	cellular organisms	Bacteria	Proteobacteria	Gammaproteobacteria	Moraxellales	Moraxellaceae	Acinetobacter	unclassified Acinetobacter	Acinetobacter sp. CIP 102136
1	root	cellular organisms	Bacteria	FCB group	Bacteroidetes/Chlorobi group	Bacteroidetes	Flavobacteriia	Flavobacteriales	Weeksellaceae	Chryseobacterium group	Chryseobacterium	Chryseobacterium arthrosphaerae
1	root	cellular organisms	Bacteria	Terrabacteria group	Actinobacteria	Coriobacteriia	Coriobacteriales	unclassified Coriobacteriales	Coriobacteriales bacterium OH1046
2	root	cellular organisms	Bacteria	FCB group	Bacteroidetes/Chlorobi group	Bacteroidetes	Bacteroidia	Bacteroidales	Bacteroidaceae	Bacteroides	Bacteroides thetaiotaomicron
1	root	cellular organisms	Bacteria	Proteobacteria	Betaproteobacteria	Burkholderiales	Burkholderiales genera incertae sedis	Ideonella	unclassified Ideonella	Ideonella sp. B508-1
1	root	cellular organisms	Bacteria	Terrabacteria group	Deinococcus-Thermus	Deinococci	Trueperales	Trueperaceae	Truepera	environmental samples	uncultured Truepera sp.
1	root	cellular organisms	Bacteria	Proteobacteria	Alphaproteobacteria	Hyphomicrobiales	Phyllobacteriaceae	Mesorhizobium	unclassified Mesorhizobium	Mesorhizobium sp. B2-1-3A
1	root	cellular organisms	Bacteria	Proteobacteria	delta/epsilon subdivisions	Deltaproteobacteria	Myxococcales	Cystobacterineae	Myxococcaceae	Myxococcus	Myxococcus stipitatus
1	root	cellular organisms	Bacteria	Terrabacteria group	Firmicutes	Clostridia	Eubacteriales	Christensenellaceae	Christensenella
1	root	cellular organisms	Bacteria	Terrabacteria group	Actinobacteria	Actinomycetia	Streptosporangiales	Thermomonosporaceae	Actinomadura	Actinomadura hallensis
1	root	cellular organisms	Bacteria	Proteobacteria	Gammaproteobacteria	Chromatiales	Ectothiorhodospiraceae	Spiribacter	unclassified Spiribacter	Spiribacter sp. E85
1	root	cellular organisms	Bacteria	PVC group	Verrucomicrobia	unclassified Verrucomicrobia	Verrucomicrobia bacterium GWC2_42_7
1	root	cellular organisms	Bacteria	Proteobacteria	Alphaproteobacteria	Rhodobacterales	Rhodobacteraceae	unclassified Rhodobacteraceae	Rhodobacteraceae bacterium HLUCCO18
1	root	cellular organisms	Bacteria	Terrabacteria group	Firmicutes	Bacilli	Bacillales	Bacillaceae	Bacillus	unclassified Bacillus (in: Bacteria)	Bacillus sp. NP157
2	root	cellular organisms	Bacteria	Proteobacteria	Gammaproteobacteria	Alteromonadales	Shewanellaceae	Shewanella	Shewanella fodinae
1	root	cellular organisms	Bacteria	FCB group	Bacteroidetes/Chlorobi group	Bacteroidetes	Flavobacteriia	Flavobacteriales	Flavobacteriaceae	Myroides	unclassified Myroides	Myroides sp. WP-1
1	root	cellular organisms	Bacteria	FCB group	Bacteroidetes/Chlorobi group	Bacteroidetes	Bacteroidia	Bacteroidales	Dysgonomonadaceae	Dysgonomonas	unclassified Dysgonomonas	Dysgonomonas sp. 25
1	root	cellular organisms	Bacteria	Terrabacteria group	Firmicutes	unclassified Firmicutes sensu stricto	Firmicutes bacterium HGW-Firmicutes-21
1	root	cellular organisms	Bacteria	FCB group	Bacteroidetes/Chlorobi group	Bacteroidetes	Sphingobacteriia	Sphingobacteriales	Sphingobacteriaceae	Mucilaginibacter	Mucilaginibacter auburnensis
1	root	Viruses	Riboviria	Pararnavirae	Artverviricota	Revtraviricetes	Ortervirales	Retroviridae	Orthoretrovirinae	Deltaretrovirus	Primate T-lymphotropic virus 3	Simian T-lymphotropic virus 3
2	root	cellular organisms	Bacteria	Bacteria incertae sedis	Bacteria candidate phyla	candidate division WWE3	candidate division WWE3 bacterium RIFOXYD1_FULL_39_9
1	root	cellular organisms	Eukaryota	Opisthokonta	Fungi	Dikarya	Ascomycota	saccharomyceta	Pezizomycotina	Orbiliomycetes	Orbiliales	Orbiliaceae	Arthrobotrys	Arthrobotrys flagrans
1	root	cellular organisms	Bacteria	Proteobacteria	Gammaproteobacteria	Oceanospirillales	Oceanospirillaceae	unclassified Oceanospirillaceae	Oceanospirillaceae bacterium ASx5O
1	root	cellular organisms	Bacteria	Proteobacteria	Alphaproteobacteria	Sphingomonadales	Sphingomonadaceae	Sphingopyxis	Sphingopyxis fribergensis
2	root	cellular organisms	Bacteria	Proteobacteria	Gammaproteobacteria	Enterobacterales	Enterobacteriaceae	Shigella	Shigella sonnei
1	root	cellular organisms	Bacteria	Terrabacteria group	Cyanobacteria/Melainabacteria group	Cyanobacteria	Synechococcales	Prochlorococcaceae	Cyanobium	unclassified Cyanobium	Cyanobium sp. PCC 7001
1	root	cellular organisms	Eukaryota	Opisthokonta	Fungi	Dikarya	Basidiomycota	Agaricomycotina	Agaricomycetes	Agaricomycetes incertae sedis	Polyporales	Polyporaceae	Polyporus	Polyporus squamosus
1	root	cellular organisms	Bacteria	FCB group	Bacteroidetes/Chlorobi group	Bacteroidetes	Chitinophagia	Chitinophagales	Chitinophagaceae	Chitinophaga	Chitinophaga silvisoli
1	root	cellular organisms	Bacteria	Terrabacteria group	Firmicutes	Clostridia	Eubacteriales	Clostridiaceae	Alkaliphilus	Alkaliphilus metalliredigens
2	root	cellular organisms	Bacteria	Terrabacteria group	Actinobacteria	Actinomycetia	Streptomycetales	Streptomycetaceae	Streptomyces	Streptomyces phaeolivaceus
1	root	cellular organisms	Bacteria	Terrabacteria group	Firmicutes	Clostridia	Eubacteriales	Lachnospiraceae	Butyrivibrio	unclassified Butyrivibrio	Butyrivibrio sp. AE2015
1	root	cellular organisms	Bacteria	Proteobacteria	Betaproteobacteria	Burkholderiales	Oxalobacteraceae	Massilia group	Massilia	Massilia plicata
1	root	cellular organisms	Bacteria	Terrabacteria group	Actinobacteria	Coriobacteriia	Eggerthellales	Eggerthellaceae	Adlercreutzia	Adlercreutzia caecimuris
1	root	cellular organisms	Bacteria	Proteobacteria	Alphaproteobacteria	Hyphomicrobiales	Phyllobacteriaceae	Paramesorhizobium	Paramesorhizobium deserti
1	root	cellular organisms	Bacteria	Proteobacteria	Gammaproteobacteria	Methylococcales	Methylococcaceae	Methylomicrobium	unclassified Methylomicrobium	Methylomicrobium sp. wino1
1	root	cellular organisms	Bacteria	Proteobacteria	Gammaproteobacteria	Alteromonadales	Alteromonadaceae	Alteromonas/Salinimonas group	Alteromonas	unclassified Alteromonas	Alteromonas sp. KUL49
2	root	cellular organisms	Bacteria	PVC group	Lentisphaerae	unclassified Lentisphaerae	Lentisphaerae bacterium GWF2_38_69
1	root	cellular organisms	Eukaryota	Opisthokonta	Fungi	Dikarya	Ascomycota	saccharomyceta	Pezizomycotina	leotiomyceta	sordariomyceta	Sordariomycetes	Xylariomycetidae	Xylariales	Pseudomassariaceae	Pseudomassariella	Pseudomassariella vexata
3	root	cellular organisms	Bacteria	Proteobacteria	delta/epsilon subdivisions	Deltaproteobacteria	Myxococcales	Nannocystineae	Nannocystaceae	Pseudenhygromyxa	unclassified Pseudenhygromyxa	Pseudenhygromyxa sp. WMMC2535
2	root	cellular organisms	Bacteria	Thermotogae	Thermotogae	Thermotogales	Fervidobacteriaceae	Fervidobacterium	Fervidobacterium thailandense
1	root	cellular organisms	Bacteria	Proteobacteria	Gammaproteobacteria	Pseudomonadales	Pseudomonadaceae	Pseudomonas	unclassified Pseudomonas	Pseudomonas sp. L-22-4S-12
2	root	cellular organisms	Bacteria	FCB group	Bacteroidetes/Chlorobi group	Bacteroidetes	Sphingobacteriia	Sphingobacteriales	Sphingobacteriaceae	Sphingobacterium	Sphingobacterium siyangense
1	root	cellular organisms	Bacteria	Proteobacteria	Alphaproteobacteria	Hyphomicrobiales	Rhizobiaceae	Rhizobium/Agrobacterium group	Rhizobium	unclassified Rhizobium	Rhizobium sp. BK602
1	root	cellular organisms	Bacteria	Proteobacteria	Betaproteobacteria	Burkholderiales	Oxalobacteraceae	Noviherbaspirillum	Noviherbaspirillum denitrificans
1	root	cellular organisms	Bacteria	Nitrospirae	unclassified Nitrospirae	Nitrospirae bacterium RIFCSPHIGHO2_01_FULL_66_17
1	root	cellular organisms	Bacteria	FCB group	Bacteroidetes/Chlorobi group	Bacteroidetes	Bacteroidia	Bacteroidales	Bacteroidaceae	Bacteroides	unclassified Bacteroides	Bacteroides sp. SM23_62
1	root	cellular organisms	Bacteria	environmental samples	uncultured bacterium contig00053
1	root	cellular organisms	Bacteria	Proteobacteria	delta/epsilon subdivisions	Deltaproteobacteria	Desulfuromonadales	unclassified Desulfuromonadales	Desulfuromonadales bacterium GWD2_54_10
1	root	cellular organisms	Bacteria	FCB group	Bacteroidetes/Chlorobi group	Bacteroidetes	unclassified Bacteroidetes	Bacteroidetes bacterium HGW-Bacteroidetes-16
1	root	cellular organisms	Bacteria	Proteobacteria	Alphaproteobacteria	Sphingomonadales	Sphingomonadaceae	Novosphingobium	unclassified Novosphingobium	Novosphingobium sp. B-7
1	root	cellular organisms	Bacteria	Proteobacteria	Alphaproteobacteria	Sphingomonadales	Sphingomonadaceae	Sphingomonas	unclassified Sphingomonas	Sphingomonas sp. YR710
1	root	cellular organisms	Bacteria	Proteobacteria	Betaproteobacteria	Burkholderiales	Comamonadaceae	Hydrogenophaga	unclassified Hydrogenophaga	Hydrogenophaga sp. YM1
1	root	cellular organisms	Bacteria	FCB group	Bacteroidetes/Chlorobi group	Bacteroidetes	Bacteroidia	Bacteroidales	Bacteroidaceae	Bacteroides	environmental samples	Bacteroides sp. CAG:443
1	root	cellular organisms	Bacteria	Terrabacteria group	Firmicutes	Bacilli	Bacillales	Bacillaceae	Aquibacillus	Aquibacillus kalidii
1	root	cellular organisms	Bacteria	Proteobacteria	Alphaproteobacteria	Sphingomonadales	Sphingomonadaceae	Rhizorhabdus	Rhizorhabdus dicambivorans
1	root	cellular organisms	Bacteria	Proteobacteria	Alphaproteobacteria	Hyphomicrobiales	Phyllobacteriaceae	Mesorhizobium	unclassified Mesorhizobium	Mesorhizobium sp. B3-1-7
5	root	cellular organisms	Bacteria	FCB group	Bacteroidetes/Chlorobi group	Chlorobi	Chlorobia	Chlorobiales	Chlorobiaceae	Prosthecochloris	Prosthecochloris vibrioformis
1	root	cellular organisms	Bacteria	Proteobacteria	delta/epsilon subdivisions	Deltaproteobacteria	Desulfovibrionales	Desulfohalobiaceae	Desulfonatronospira	Desulfonatronospira thiodismutans
1	root	cellular organisms	Bacteria	PVC group	Verrucomicrobia	Spartobacteria	Candidatus Xiphinematobacter	unclassified Candidatus Xiphinematobacter	Candidatus Xiphinematobacter sp.
2	root	cellular organisms	Bacteria	Terrabacteria group	Firmicutes	Clostridia	Thermoanaerobacterales	Thermoanaerobacteraceae	Moorella group	Ammonifex	unclassified Ammonifex	Ammonifex sp.
1	root	cellular organisms	Eukaryota	Opisthokonta	Fungi	Dikarya	Ascomycota	saccharomyceta	Pezizomycotina	leotiomyceta	sordariomyceta	Sordariomycetes	Hypocreomycetidae	Hypocreales	Ophiocordycipitaceae	Ophiocordyceps	Ophiocordyceps australis
2	root	cellular organisms	Bacteria	PVC group	Verrucomicrobia	Spartobacteria	Chthoniobacterales	unclassified Chthoniobacterales	Chthoniobacterales bacterium
1	root	cellular organisms	Bacteria	Terrabacteria group	Actinobacteria	Coriobacteriia	Coriobacteriales	Coriobacteriaceae	Collinsella	unclassified Collinsella	Collinsella sp. TM09-10AT
1	root	cellular organisms	Bacteria	Proteobacteria	Alphaproteobacteria	Rhodobacterales	Roseobacteraceae	Sulfitobacter	unclassified Sulfitobacter	Sulfitobacter sp. DFL-14
1	root	cellular organisms	Bacteria	FCB group	Bacteroidetes/Chlorobi group	Chlorobi	Chlorobia	Chlorobiales	Chlorobiaceae	Chlorobium/Pelodictyon group	Pelodictyon
2	root	cellular organisms	Bacteria	PVC group	Planctomycetes	Planctomycetia	Pirellulales	Pirellulaceae	Pirellula	Pirellula staleyi
1	root	cellular organisms	Bacteria	Terrabacteria group	Actinobacteria	Actinomycetia	Pseudonocardiales	Pseudonocardiaceae	Actinophytocola	Actinophytocola algeriensis
2	root	cellular organisms	Bacteria	Proteobacteria	Gammaproteobacteria	Chromatiales	Ectothiorhodospiraceae	Ectothiorhodospira	Ectothiorhodospira shaposhnikovii
2	root	cellular organisms	Bacteria	Terrabacteria group	Firmicutes	Bacilli	Bacillales	Thermoactinomycetaceae	Lihuaxuella	Lihuaxuella thermophila
1	root	cellular organisms	Bacteria	Atribacterota	unclassified Atribacterota
1	root	cellular organisms	Bacteria	FCB group	Bacteroidetes/Chlorobi group	Bacteroidetes	unclassified Bacteroidetes	Bacteroidetes bacterium MED-G17
2	root	cellular organisms	Eukaryota	Amoebozoa	Discosea	Longamoebia	Centramoebida	Acanthamoebidae	Acanthamoeba	Acanthamoeba castellanii	Acanthamoeba castellanii str. Neff
1	root	cellular organisms	Bacteria	Proteobacteria	Betaproteobacteria	Burkholderiales	Burkholderiaceae	Burkholderia	unclassified Burkholderia	Burkholderia sp. JKS000303
1	root	cellular organisms	Bacteria	FCB group	candidate division Zixibacteria	unclassified candidate division Zixibacteria	candidate division Zixibacteria bacterium RBG_16_50_21
1	root	cellular organisms	Bacteria	Proteobacteria	delta/epsilon subdivisions	Deltaproteobacteria	Desulfobacterales	Desulfobacteraceae	environmental samples	uncultured Desulfobacteraceae bacterium
1	root	cellular organisms	Bacteria	FCB group	Bacteroidetes/Chlorobi group	Bacteroidetes	Flavobacteriia	Flavobacteriales	Flavobacteriaceae	Flavobacterium	Flavobacterium proteolyticum
2	root	cellular organisms	Bacteria	Proteobacteria	Alphaproteobacteria	Rhodobacterales	Roseobacteraceae	Roseovarius	unclassified Roseovarius	Roseovarius sp. BRH_c41
1	root	cellular organisms	Bacteria	FCB group	Bacteroidetes/Chlorobi group	Bacteroidetes	Cytophagia	Cytophagales	Hymenobacteraceae	Pontibacter	Pontibacter pamirensis
1	root	cellular organisms	Bacteria	FCB group	Bacteroidetes/Chlorobi group	Bacteroidetes	Cytophagia	Cytophagales	Hymenobacteraceae	Pontibacter	Pontibacter fetidus
3	root	cellular organisms	Bacteria	Proteobacteria	Alphaproteobacteria	Rhodospirillales	Acetobacteraceae	Falsiroseomonas	Falsiroseomonas bella
1	root	cellular organisms	Bacteria	Terrabacteria group	Firmicutes	Bacilli	Bacillales	Sporolactobacillaceae	Sporolactobacillus	Sporolactobacillus laevolacticus
1	root	cellular organisms	Bacteria	Proteobacteria	Alphaproteobacteria	Rhodobacterales	Rhodobacteraceae	Rhodovulum	Rhodovulum marinum
1	root	Viruses	Varidnaviria	Bamfordvirae	Nucleocytoviricota	Megaviricetes	Algavirales	Phycodnaviridae	unclassified Phycodnaviridae	Orpheovirus IHUMI-LCC2
2	root	cellular organisms	Eukaryota	Viridiplantae	Chlorophyta	core chlorophytes	Chlorophyceae	CS clade	Sphaeropleales	Scenedesmaceae	Scenedesmus	unclassified Scenedesmus	Scenedesmus sp. PABB004
1	root	cellular organisms	Bacteria	Proteobacteria	Alphaproteobacteria	Rhodobacterales	Rhodobacteraceae	Paracoccus	Paracoccus amoyensis
1	root	cellular organisms	Bacteria	FCB group	Bacteroidetes/Chlorobi group	Bacteroidetes	Bacteroidia	Bacteroidales	Tannerellaceae	Parabacteroides	unclassified Parabacteroides	Parabacteroides sp. AM44-16
2	root	cellular organisms	Bacteria	Proteobacteria	Alphaproteobacteria	Rhodobacterales	Roseobacteraceae	Maritimibacter	unclassified Maritimibacter	Maritimibacter sp. DP1N21-5
1	root	cellular organisms	Bacteria	Terrabacteria group	Firmicutes	environmental samples	Firmicutes bacterium CAG:884
2	root	cellular organisms	Bacteria	Terrabacteria group	Firmicutes	Bacilli	Bacillales	Bacillaceae	Pelagirhabdus	Pelagirhabdus alkalitolerans
2	root	cellular organisms	Bacteria	Terrabacteria group	Chloroflexi	Chloroflexia	environmental samples	uncultured Chloroflexia bacterium
1	root	cellular organisms	Bacteria	Proteobacteria	Betaproteobacteria	Burkholderiales	Comamonadaceae	Acidovorax	unclassified Acidovorax	Acidovorax sp. 17-64-282
1	root	cellular organisms	Bacteria	Terrabacteria group	Firmicutes	Clostridia	Eubacteriales	Lachnospiraceae	Sporofaciens	Sporofaciens musculi
1	root	cellular organisms	Bacteria	FCB group	Bacteroidetes/Chlorobi group	Chlorobi	Chlorobia	Chlorobiales	Candidatus Thermochlorobacteriaceae	Candidatus Thermochlorobacter	Candidatus Thermochlorobacter aerophilum
1	root	cellular organisms	Bacteria	Proteobacteria	Gammaproteobacteria	Vibrionales	Vibrionaceae	Photobacterium	Photobacterium leiognathi
1	root	cellular organisms	Bacteria	Terrabacteria group	Actinobacteria	Actinomycetia	Corynebacteriales	Corynebacteriaceae	Corynebacterium	Corynebacterium vitaeruminis
3	root	cellular organisms	Bacteria	Proteobacteria	delta/epsilon subdivisions	Deltaproteobacteria	Desulfobacterales	Desulfobulbaceae	Desulfomarina	Desulfomarina profundi
3	root	cellular organisms	Bacteria	Proteobacteria	Betaproteobacteria	Rhodocyclales	Azonexaceae	Azonexus	Azonexus fungiphilus
1	root	cellular organisms	Bacteria	Terrabacteria group	Firmicutes	Clostridia	Eubacteriales	Clostridiaceae	Clostridium	unclassified Clostridium	Clostridium sp. D53t1_180928_C8
2	root	cellular organisms	Bacteria	Proteobacteria	Alphaproteobacteria	Rhodobacterales	Rhodobacteraceae	Thioclava	unclassified Thioclava	Thioclava sp. IC9
2	root	cellular organisms	Bacteria	Proteobacteria	Alphaproteobacteria	Rhodospirillales	Thalassospiraceae
1	root	cellular organisms	Bacteria	Terrabacteria group	Firmicutes	Bacilli	Bacillales	Paenibacillaceae	Aneurinibacillus group	Ammoniphilus	unclassified Ammoniphilus	Ammoniphilus sp. CFH 90114
1	root	cellular organisms	Bacteria	FCB group	Bacteroidetes/Chlorobi group	Bacteroidetes	Bacteroidia	Bacteroidales	Tannerellaceae	Parabacteroides	unclassified Parabacteroides	Parabacteroides sp. ZJ-118
1	root	cellular organisms	Bacteria	Proteobacteria	Alphaproteobacteria	Hyphomicrobiales	Boseaceae	Bosea	Bosea vaviloviae
1	root	cellular organisms	Bacteria	FCB group	Bacteroidetes/Chlorobi group	Bacteroidetes	Cytophagia	Cytophagales	Cytophagaceae	Spirosoma	Spirosoma luteum
1	root	cellular organisms	Bacteria	FCB group	Bacteroidetes/Chlorobi group	Bacteroidetes	Flavobacteriia	Flavobacteriales	Flavobacteriaceae	Flavobacterium	Flavobacterium sufflavum
1	root	cellular organisms	Bacteria	FCB group	Fibrobacteres	Fibrobacteria	Fibrobacterales	Fibrobacteraceae	Fibrobacter	unclassified Fibrobacter	Fibrobacter sp. UWR3
1	root	cellular organisms	Bacteria	Proteobacteria	Alphaproteobacteria	Hyphomicrobiales	Brucellaceae	Brucella/Ochrobactrum group	Brucella	Brucella tritici
1	root	cellular organisms	Bacteria	Terrabacteria group	Chloroflexi	Candidatus Limnocylindria	Candidatus Aquidulcis	unclassified Candidatus Aquidulcis	Candidatus Aquidulcis sp.
1	root	cellular organisms	Bacteria	FCB group	Bacteroidetes/Chlorobi group	Chlorobi	Chlorobia	Chlorobiales	Chlorobiaceae	Chlorobaculum	Chlorobaculum thiosulfatiphilum
2	root	cellular organisms	Eukaryota	Opisthokonta	Fungi	Fungi incertae sedis	Mucoromycota	Glomeromycotina	Glomeromycetes	Diversisporales	Diversisporaceae	Diversispora	Diversispora epigaea
1	root	cellular organisms	Eukaryota	Viridiplantae	Chlorophyta	core chlorophytes	Chlorophyceae	CS clade	Chlamydomonadales	Chlamydomonadaceae	Chlamydomonas	unclassified Chlamydomonas	Chlamydomonas sp. UWO 241
2	root	cellular organisms	Bacteria	Terrabacteria group	Firmicutes	Clostridia	Eubacteriales	Clostridiaceae	Clostridium	Clostridium culturomicium
2	root	cellular organisms	Bacteria	Proteobacteria	Alphaproteobacteria	Hyphomicrobiales	Rhodovibrionaceae	Fodinicurvata	Fodinicurvata sediminis
3	root	cellular organisms	Bacteria	Proteobacteria	Gammaproteobacteria	Cardiobacteriales	Cardiobacteriaceae	Suttonella	unclassified Suttonella	Suttonella sp. R2A3
1	root	cellular organisms	Bacteria	Terrabacteria group	Firmicutes	Clostridia	Eubacteriales	Lachnospiraceae	unclassified Lachnospiraceae	Lachnospiraceae bacterium A4
1	root	cellular organisms	Bacteria	Terrabacteria group	Firmicutes	Clostridia	Eubacteriales	Lachnospiraceae	Dorea	environmental samples	Dorea sp. CAG:317
1	root	cellular organisms	Bacteria	Terrabacteria group	Actinobacteria	Actinomycetia	Micrococcales	Demequinaceae	Demequina	Demequina flava
1	root	cellular organisms	Bacteria	Terrabacteria group	Firmicutes	Bacilli	Lactobacillales	Streptococcaceae	Streptococcus	Streptococcus criceti
2	root	cellular organisms	Bacteria	Terrabacteria group	Cyanobacteria/Melainabacteria group	Cyanobacteria	Pseudanabaenales	Pseudanabaenaceae	Pseudanabaena	unclassified Pseudanabaena	Pseudanabaena sp. FACHB-2040
1	root	cellular organisms	Bacteria	Proteobacteria	Gammaproteobacteria	Pseudomonadales	Pseudomonadaceae	Pseudomonas	Pseudomonas putida group	Pseudomonas mosselii
1	root	cellular organisms	Bacteria	Proteobacteria	Betaproteobacteria	Burkholderiales	Oxalobacteraceae	Herbaspirillum	unclassified Herbaspirillum	Herbaspirillum sp. CAH-3
1	root	cellular organisms	Bacteria	Terrabacteria group	Actinobacteria	Actinomycetia	Micrococcales	Intrasporangiaceae	Kribbia	Kribbia dieselivorans
1	root	cellular organisms	Bacteria	Proteobacteria	Betaproteobacteria	Burkholderiales	Burkholderiaceae	Paraburkholderia	Paraburkholderia polaris
1	root	cellular organisms	Archaea	Candidatus Thermoplasmatota	Thermoplasmata	Thermoplasmatales	unclassified Thermoplasmatales	Thermoplasmatales archaeon
1	root	cellular organisms	Bacteria	Proteobacteria	Gammaproteobacteria	Gammaproteobacteria incertae sedis	Candidatus Kentron	unclassified Candidatus Kentron	Candidatus Kentron sp. FM
1	root	cellular organisms	Bacteria	Terrabacteria group	Firmicutes	Clostridia	Eubacteriales	Heliobacteriaceae	Heliomicrobium	Heliomicrobium modesticaldum
1	root	cellular organisms	Bacteria	Proteobacteria	Gammaproteobacteria	Xanthomonadales	Xanthomonadaceae	Lysobacter	Lysobacter solisilvae (ex Kim et al. 2021)
2	root	cellular organisms	Bacteria	Proteobacteria	Alphaproteobacteria	Rhodobacterales	Roseobacteraceae	Roseovarius	Roseovarius spongiae
1	root	cellular organisms	Bacteria	Proteobacteria	Alphaproteobacteria	Hyphomicrobiales	Bradyrhizobiaceae	Bradyrhizobium	Bradyrhizobium iriomotense
1	root	cellular organisms	Bacteria	Terrabacteria group	Actinobacteria	Actinomycetia	Micrococcales	Microbacteriaceae	Mycetocola	Mycetocola reblochoni
1	root	cellular organisms	Bacteria	Proteobacteria	Gammaproteobacteria	Pseudomonadales	Pseudomonadaceae	Pseudomonas	Pseudomonas syringae group	Pseudomonas cichorii
1	root	cellular organisms	Bacteria	Proteobacteria	Hydrogenophilalia	Hydrogenophilales	unclassified Hydrogenophilales	Hydrogenophilales bacterium CG18_big_fil_WC_8_21_14_2_50_58_12
1	root	cellular organisms	Bacteria	Proteobacteria	Betaproteobacteria	Nitrosomonadales	Gallionellaceae	Candidatus Nitrotoga	unclassified Candidatus Nitrotoga	Candidatus Nitrotoga sp. AM1P
1	root	cellular organisms	Bacteria	Proteobacteria	Gammaproteobacteria	Moraxellales	Moraxellaceae	Acinetobacter	Acinetobacter beijerinckii
1	root	cellular organisms	Bacteria	Proteobacteria	Gammaproteobacteria	Pseudomonadales	Pseudomonadaceae	Halopseudomonas	Halopseudomonas pelagia
1	root	cellular organisms	Bacteria	FCB group	Bacteroidetes/Chlorobi group	Bacteroidetes	Flavobacteriia	Flavobacteriales	Flavobacteriaceae	Flavobacterium	unclassified Flavobacterium	Flavobacterium sp. MC2016-06
5	root	cellular organisms	Bacteria	Proteobacteria	delta/epsilon subdivisions	Deltaproteobacteria	Desulfobacterales	Desulfocapsaceae	Desulfopila	unclassified Desulfopila	Desulfopila sp. IMCC35008
2	root	cellular organisms	Bacteria	Proteobacteria	delta/epsilon subdivisions	Deltaproteobacteria	Desulfobacterales	Desulfobacteraceae
1	root	cellular organisms	Bacteria	Terrabacteria group	Firmicutes	Bacilli	Lactobacillales	Lactobacillaceae	Fructobacillus
1	root	cellular organisms	Bacteria	FCB group	Bacteroidetes/Chlorobi group	Bacteroidetes	Flavobacteriia	Flavobacteriales	Flavobacteriaceae	Flavobacterium	Flavobacterium fontis
1	root	cellular organisms	Bacteria	Terrabacteria group	Firmicutes	Clostridia	Eubacteriales	Lachnospiraceae	Lacrimispora	Lacrimispora celerecrescens
1	root	cellular organisms	Bacteria	Terrabacteria group	Actinobacteria	Actinomycetia	Micrococcales	Microbacteriaceae	Microbacterium	Microbacterium jejuense
1	root	cellular organisms	Bacteria	Terrabacteria group	Firmicutes	Bacilli	Bacillales	Bacillaceae	Mesobacillus	Mesobacillus subterraneus
2	root	cellular organisms	Bacteria	Proteobacteria	Betaproteobacteria	Nitrosomonadales	Sterolibacteriaceae	Sulfuritalea	Sulfuritalea hydrogenivorans
1	root	cellular organisms	Archaea	Euryarchaeota	environmental samples	uncultured euryarchaeote Alv-FOS5
1	root	cellular organisms	Bacteria	Terrabacteria group	Actinobacteria	Actinomycetia	Streptomycetales	Streptomycetaceae	Kitasatospora	unclassified Kitasatospora	Kitasatospora sp. A2-31
1	root	cellular organisms	Bacteria	Terrabacteria group	Actinobacteria	Thermoleophilia	Solirubrobacterales	Solirubrobacteraceae	Solirubrobacter	unclassified Solirubrobacter	Solirubrobacter sp. CPCC 204708
1	root	cellular organisms	Bacteria	Proteobacteria	Alphaproteobacteria	Rhodobacterales	Rhodobacteraceae	unclassified Rhodobacteraceae	Rhodobacteraceae bacterium CCMM004
1	root	cellular organisms	Bacteria	Terrabacteria group	Actinobacteria	Actinomycetia	Micrococcales	Micrococcaceae	Nesterenkonia	Nesterenkonia cremea
1	root	cellular organisms	Archaea	Euryarchaeota	unclassified Euryarchaeota	Euryarchaeota archaeon ADurb.Bin294
1	root	cellular organisms	Eukaryota	Opisthokonta	Fungi	Fungi incertae sedis	Mucoromycota	Mortierellomycotina	Mortierellomycetes	Mortierellales	Mortierellaceae	Entomortierella	Entomortierella beljakovae
1	root	cellular organisms	Eukaryota	Opisthokonta	Fungi	Dikarya	Ascomycota	saccharomyceta	Pezizomycotina	leotiomyceta	dothideomyceta	Dothideomycetes	Dothideomycetidae	Dothideales	Dothioraceae	Delphinella	Delphinella strobiligena
3	root	cellular organisms	Bacteria	Synergistetes	Synergistia	Synergistales	Synergistaceae	Thermanaerovibrio	Thermanaerovibrio velox
1	root	cellular organisms	Bacteria	Terrabacteria group	Firmicutes	Clostridia	Eubacteriales	Lachnospiraceae	Fusicatenibacter	Fusicatenibacter saccharivorans
1	root	cellular organisms	Bacteria	Proteobacteria	Betaproteobacteria	unclassified Betaproteobacteria	Betaproteobacteria bacterium RIFCSPLOWO2_12_FULL_62_58
1	root	cellular organisms	Bacteria	Proteobacteria	Alphaproteobacteria	Hyphomicrobiales	Hyphomicrobiales incertae sedis	Vineibacter	Vineibacter terrae
1	root	cellular organisms	Bacteria	Proteobacteria	delta/epsilon subdivisions	Epsilonproteobacteria	Campylobacterales	Sulfurovaceae	Sulfurovum	unclassified Sulfurovum	Sulfurovum sp. AS07-7
2	root	cellular organisms	Bacteria	Proteobacteria	Betaproteobacteria	Burkholderiales	Burkholderiaceae	Polynucleobacter
3	root	cellular organisms	Bacteria	Proteobacteria	Betaproteobacteria	Rhodocyclales	unclassified Rhodocyclales
1	root	cellular organisms	Bacteria	Terrabacteria group	Actinobacteria	Rubrobacteria	Rubrobacterales	Baekduiaceae	Baekduia	Baekduia soli
1	root	cellular organisms	Bacteria	Terrabacteria group	Cyanobacteria/Melainabacteria group	Cyanobacteria	Nostocales	Symphyonemataceae	Mastigocladopsis	Mastigocladopsis repens
1	root	cellular organisms	Bacteria	Terrabacteria group	Firmicutes	Bacilli	Bacillales	Bacillaceae	Metabacillus	Metabacillus halosaccharovorans
1	root	cellular organisms	Bacteria	Proteobacteria	Alphaproteobacteria	Rhodobacterales	Rhodobacteraceae	Rhodobacter	unclassified Rhodobacter	Rhodobacter sp. 24-YEA-8
1	root	Viruses	Duplodnaviria	Heunggongvirae	Uroviricota	Caudoviricetes	Caudovirales	Myoviridae	Jedunavirus	unclassified Jedunavirus	Klebsiella phage BUCT_47333
1	root	cellular organisms	Bacteria	Proteobacteria	Alphaproteobacteria	Rhodobacterales	Rhodobacteraceae	Paracoccus	unclassified Paracoccus (in: Bacteria)	Paracoccus sp. IB05
1	root	cellular organisms	Bacteria	Terrabacteria group	Chloroflexi	Ardenticatenia	Ardenticatenales	Ardenticatenaceae	unclassified Ardenticatenaceae	Ardenticatenaceae bacterium
1	root	cellular organisms	Bacteria	Proteobacteria	Alphaproteobacteria	Rhodospirillales	Rhodospirillaceae	Pararhodospirillum	Pararhodospirillum oryzae
1	root	cellular organisms	Bacteria	Terrabacteria group	Firmicutes	Bacilli	Bacillales	Bacillaceae	Gracilibacillus	Gracilibacillus halophilus
1	root	cellular organisms	Bacteria	Terrabacteria group	Firmicutes	Clostridia	Halanaerobiales	Halobacteroidaceae	Halanaerobacter	Halanaerobacter jeridensis
1	root	cellular organisms	Bacteria	Proteobacteria	delta/epsilon subdivisions	Deltaproteobacteria	Myxococcales	Cystobacterineae	Myxococcaceae	Pyxidicoccus	Pyxidicoccus trucidator
1	root	cellular organisms	Bacteria	PVC group	Planctomycetes	Planctomycetia	Planctomycetales	Planctomycetaceae
1	root	cellular organisms	Bacteria	Terrabacteria group	Firmicutes	Negativicutes	Selenomonadales	Selenomonadaceae	Mitsuokella	Mitsuokella jalaludinii
1	root	cellular organisms	Bacteria	FCB group	Bacteroidetes/Chlorobi group	Bacteroidetes	Bacteroidia	Bacteroidales	Prevotellaceae	Prevotella	environmental samples	Prevotella sp. CAG:617
1	root	cellular organisms	Bacteria	PVC group	Planctomycetes	Phycisphaerae	Phycisphaerales	Phycisphaeraceae	Phycisphaera	unclassified Phycisphaera	Phycisphaera sp. TMED9
1	root	cellular organisms	Bacteria	Nitrospirae	unclassified Nitrospirae	Nitrospirae bacterium GWC2_57_13
1	root	cellular organisms	Eukaryota	Discoba	Euglenozoa	Kinetoplastea	Metakinetoplastina	Trypanosomatida	Trypanosomatidae	Leishmaniinae	Leishmania	Mundinia
1	root	cellular organisms	Bacteria	Terrabacteria group	Cyanobacteria/Melainabacteria group	Cyanobacteria	Nostocales	Nostocaceae	Nostoc	Nostoc calcicola
1	root	cellular organisms	Bacteria	Terrabacteria group	Actinobacteria	Actinomycetia	Micrococcales	Bogoriellaceae	Georgenia	Georgenia wutianyii
1	root	cellular organisms	Bacteria	Proteobacteria	delta/epsilon subdivisions	Epsilonproteobacteria	Campylobacterales	Campylobacteraceae	Campylobacter	Campylobacter helveticus
1	root	cellular organisms	Bacteria	Proteobacteria	Gammaproteobacteria	Xanthomonadales	Rhodanobacteraceae	Dokdonella	unclassified Dokdonella	Dokdonella sp.
2	root	cellular organisms	Bacteria	PVC group	Planctomycetes	Planctomycetia	Planctomycetales	Planctomycetaceae	Alienimonas	Alienimonas californiensis
1	root	cellular organisms	Bacteria	Terrabacteria group	Firmicutes	Clostridia	Eubacteriales	Peptococcaceae	Desulfotomaculum	unclassified Desulfotomaculum	Desulfotomaculum sp. 46_296
1	root	cellular organisms	Bacteria	PVC group	Kiritimatiellaeota	Kiritimatiellae	Kiritimatiellales
1	root	cellular organisms	Bacteria	Proteobacteria	Gammaproteobacteria	Vibrionales
1	root	cellular organisms	Bacteria	FCB group	Bacteroidetes/Chlorobi group	Bacteroidetes	unclassified Bacteroidetes	Bacteroidetes bacterium B1(2017)
1	root	cellular organisms	Bacteria	Proteobacteria	Betaproteobacteria	Burkholderiales	Oxalobacteraceae	Massilia group	Massilia	unclassified Massilia
1	root	cellular organisms	Archaea	unclassified Archaea	archaeon GW2011_AR3
1	root	cellular organisms	Bacteria	Terrabacteria group	Actinobacteria	Actinomycetia	Micromonosporales	Micromonosporaceae	Catellatospora	Catellatospora citrea
1	root	cellular organisms	Bacteria	Proteobacteria	Gammaproteobacteria	Moraxellales	Moraxellaceae	Acinetobacter	unclassified Acinetobacter	Acinetobacter sp. YH12075
1	root	cellular organisms	Bacteria	Terrabacteria group	Firmicutes	Clostridia	Eubacteriales	Oscillospiraceae	Ruminococcus	unclassified Ruminococcus
1	root	cellular organisms	Bacteria	FCB group	Gemmatimonadetes	Gemmatimonadetes	Gemmatimonadales	Gemmatimonadaceae	environmental samples	uncultured Gemmatimonadaceae bacterium
1	root	Viruses	Duplodnaviria	Heunggongvirae	Uroviricota	Caudoviricetes	Caudovirales	Siphoviridae	unclassified Siphoviridae	Achromobacter phage JWF
1	root	cellular organisms	Eukaryota	Amoebozoa	Evosea	Eumycetozoa	Dictyostelia	Dictyosteliales	Dictyosteliaceae	Dictyostelium	Dictyostelium discoideum	Dictyostelium discoideum AX4
1	root	cellular organisms	Bacteria	FCB group	Bacteroidetes/Chlorobi group	Bacteroidetes	Flavobacteriia	Flavobacteriales	Weeksellaceae	Moheibacter	Moheibacter sediminis
1	root	cellular organisms	Bacteria	Terrabacteria group	Firmicutes	Clostridia	Eubacteriales	Lachnospiraceae	unclassified Lachnospiraceae	Lachnospiraceae bacterium G11
1	root	cellular organisms	Archaea	unclassified Archaea	archaeon CG07_land_8_20_14_0_80_38_8
1	root	cellular organisms	Bacteria	Proteobacteria	Alphaproteobacteria	Hyphomicrobiales	Bradyrhizobiaceae	Bradyrhizobium	unclassified Bradyrhizobium	Bradyrhizobium sp. AUGA SZCCT0283
1	root	cellular organisms	Bacteria	Proteobacteria	Gammaproteobacteria	Pseudomonadales	Pseudomonadaceae	Pseudomonas	unclassified Pseudomonas	Pseudomonas sp. GW460-12-1-14-LB3
1	root	cellular organisms	Bacteria	Terrabacteria group	Actinobacteria	Actinomycetia	Streptomycetales	Streptomycetaceae	Streptomyces	Streptomyces violaceochromogenes
2	root	cellular organisms	Bacteria	Proteobacteria	Alphaproteobacteria	Hyphomicrobiales	Chelatococcaceae	Chelatococcus	Chelatococcus asaccharovorans
1	root	cellular organisms	Bacteria	Proteobacteria	delta/epsilon subdivisions	Deltaproteobacteria	Myxococcales	Cystobacterineae	Archangiaceae	Archangium
1	root	cellular organisms	Bacteria	Terrabacteria group	Firmicutes	Bacilli	Bacillales	Paenibacillaceae	Paenibacillus	Paenibacillus roseus
1	root	cellular organisms	Bacteria	Terrabacteria group	Actinobacteria	Actinomycetia	Streptosporangiales	Streptosporangiaceae	Sphaerisporangium
1	root	cellular organisms	Bacteria	Proteobacteria	Alphaproteobacteria	Hyphomicrobiales	Phyllobacteriaceae	Mesorhizobium	unclassified Mesorhizobium	Mesorhizobium sp. LSHC420B00
1	root	cellular organisms	Bacteria	Proteobacteria	Alphaproteobacteria	Rhodobacterales	Rhodobacteraceae	Tritonibacter	Tritonibacter mobilis
1	root	cellular organisms	Bacteria	Proteobacteria	Gammaproteobacteria	Methylococcales	Methylococcaceae	Methylobacter	unclassified Methylobacter	Methylobacter sp.
1	root	cellular organisms	Bacteria	Proteobacteria	Alphaproteobacteria	Hyphomicrobiales	Aurantimonadaceae	Aurantimonas
1	root	cellular organisms	Bacteria	Spirochaetes	Spirochaetia	Spirochaetales	environmental samples	uncultured spirochete
1	root	cellular organisms	Bacteria	Proteobacteria	Gammaproteobacteria	Xanthomonadales	Xanthomonadaceae	Luteimonas
1	root	cellular organisms	Bacteria	Proteobacteria	Alphaproteobacteria	Hyphomicrobiales	unclassified Hyphomicrobiales	Rhizobiales bacterium 62-47
1	root	cellular organisms	Bacteria	Proteobacteria	Alphaproteobacteria	Hyphomicrobiales	Rhizobiaceae	Rhizobium/Agrobacterium group	Rhizobium	unclassified Rhizobium	Rhizobium sp. LCM 4573
1	root	cellular organisms	Bacteria	Thermotogae	Thermotogae	Thermotogales	Thermotogaceae	Thermotoga
1	root	cellular organisms	Bacteria	Spirochaetes	unclassified Spirochaetes	Spirochaetes bacterium DG_61
1	root	cellular organisms	Bacteria	Terrabacteria group	Firmicutes	Clostridia	Thermoanaerobacterales	Thermoanaerobacteraceae	Moorella group	Moorella	Moorella humiferrea
1	root	cellular organisms	Bacteria	Terrabacteria group	Firmicutes	Bacilli	Bacillales	Bacillaceae	Salibacterium	Salibacterium salarium
1	root	cellular organisms	Bacteria	Proteobacteria	Alphaproteobacteria	Sphingomonadales	Sphingomonadaceae	Sphingobium	Sphingobium chlorophenolicum
1	root	cellular organisms	Bacteria	Proteobacteria	Alphaproteobacteria	Sphingomonadales	Sphingomonadaceae	Novosphingobium	Novosphingobium chloroacetimidivorans
1	root	cellular organisms	Bacteria	Proteobacteria	Gammaproteobacteria	Methylococcales	Methylococcaceae	Methylomonas	Methylomonas fluvii
1	root	cellular organisms	Bacteria	Bacteria incertae sedis	Bacteria candidate phyla	Patescibacteria group	Microgenomates group	Candidatus Roizmanbacteria	Candidatus Roizmanbacteria bacterium CG_4_10_14_0_2_um_filter_39_13
2	root	cellular organisms	Bacteria	Proteobacteria	Alphaproteobacteria	Rhodospirillales	Azospirillaceae	Azospirillum	Azospirillum oleiclasticum
1	root	cellular organisms	Bacteria	FCB group	Bacteroidetes/Chlorobi group	Bacteroidetes	Flavobacteriia	Flavobacteriales	Weeksellaceae	Chryseobacterium group	Chryseobacterium	Chryseobacterium phosphatilyticum
1	root	cellular organisms	Bacteria	Bacteria incertae sedis	Bacteria candidate phyla	Patescibacteria group	Parcubacteria group	Candidatus Wildermuthbacteria
1	root	cellular organisms	Bacteria	Proteobacteria	Gammaproteobacteria	Pseudomonadales	Pseudomonadaceae	Pseudomonas	Pseudomonas toyotomiensis
1	root	cellular organisms	Bacteria	Proteobacteria	Gammaproteobacteria	Alteromonadales	Psychromonadaceae	Psychromonas	Psychromonas ingrahamii
1	root	cellular organisms	Bacteria	Proteobacteria	Gammaproteobacteria	Oceanospirillales	Oceanospirillaceae
1	root	cellular organisms	Bacteria	Proteobacteria	Alphaproteobacteria	Sphingomonadales	Sphingomonadaceae	unclassified Sphingomonadaceae	Sphingomonadaceae bacterium PASS1
1	root	Viruses	Duplodnaviria	Heunggongvirae	Uroviricota	Caudoviricetes	Caudovirales	Siphoviridae	Fromanvirus	unclassified Fromanvirus
1	root	cellular organisms	Bacteria	Proteobacteria	Alphaproteobacteria	Hyphomicrobiales	Rhizobiaceae	Rhizobium/Agrobacterium group	Rhizobium	unclassified Rhizobium	Rhizobium sp. Q54
1	root	cellular organisms	Bacteria	Proteobacteria	Alphaproteobacteria	Rhodobacterales	Roseobacteraceae	Rubellimicrobium	unclassified Rubellimicrobium	Rubellimicrobium sp. CFH 75288
2	root	cellular organisms	Bacteria	Proteobacteria	Betaproteobacteria	Betaproteobacteria incertae sedis	Candidatus Accumulibacter	unclassified Candidatus Accumulibacter	Candidatus Accumulibacter sp. SK-12
1	root	cellular organisms	Bacteria	PVC group	Verrucomicrobia	unclassified Verrucomicrobia	Verrucomicrobia bacterium TMED175
2	root	cellular organisms	Bacteria	Proteobacteria	delta/epsilon subdivisions	Epsilonproteobacteria	Campylobacterales	Arcobacteraceae	unclassified Arcobacteraceae	Arcobacter sp. CECT 8985
2	root	cellular organisms	Bacteria	Proteobacteria	Alphaproteobacteria	Parvularculales	Parvularculaceae	Aquisalinus	Aquisalinus luteolus
1	root	cellular organisms	Bacteria	Terrabacteria group	Firmicutes	Clostridia	Eubacteriales	Proteinivoraceae	Anaerobranca	Anaerobranca gottschalkii
1	root	cellular organisms	Bacteria	Terrabacteria group	Actinobacteria	Actinomycetia	Propionibacteriales	Propionibacteriaceae	Tessaracoccus	Tessaracoccus coleopterorum
5	root	cellular organisms	Bacteria	FCB group	Bacteroidetes/Chlorobi group	Bacteroidetes	Bacteroidia	Bacteroidales	Dysgonomonadaceae	Dysgonomonas
1	root	cellular organisms	Bacteria	Proteobacteria	Gammaproteobacteria	Oceanospirillales	Halomonadaceae	Kushneria	Kushneria phosphatilytica
1	root	cellular organisms	Bacteria	Proteobacteria	Alphaproteobacteria	Rhodobacterales	Rhodobacteraceae	Neptunicoccus	Neptunicoccus sediminis
1	root	cellular organisms	Bacteria	FCB group	Bacteroidetes/Chlorobi group	Bacteroidetes	Flavobacteriia	Flavobacteriales	Flavobacteriaceae	Flavobacterium	Flavobacterium jumunjinense
1	root	cellular organisms	Bacteria	Terrabacteria group	Firmicutes	Clostridia	Eubacteriales	Clostridiaceae	Clostridium	environmental samples	Clostridium sp. CAG:571
2	root	cellular organisms	Bacteria	Proteobacteria	delta/epsilon subdivisions	Deltaproteobacteria	Myxococcales	Sorangiineae	Sandaracinaceae	Sandaracinus	Sandaracinus amylolyticus
1	root	cellular organisms	Bacteria	Terrabacteria group	Firmicutes	Erysipelotrichia	Erysipelotrichales	Erysipelotrichaceae	Candidatus Stoquefichus	unclassified Candidatus Stoquefichus	Candidatus Stoquefichus sp. SB1
1	root	cellular organisms	Bacteria	Proteobacteria	Betaproteobacteria	Burkholderiales	Alcaligenaceae	Paralcaligenes	unclassified Paralcaligenes	Paralcaligenes sp. KSB-10
1	root	cellular organisms	Bacteria	FCB group	Bacteroidetes/Chlorobi group	Bacteroidetes	Flavobacteriia	Flavobacteriales	Flavobacteriaceae	Tenacibaculum	unclassified Tenacibaculum	Tenacibaculum sp. MAR_2009_124
2	root	cellular organisms	Bacteria	Bacteria incertae sedis	Bacteria candidate phyla	Candidatus Aerophobetes	unclassified Aerophobetes	Candidatus Aerophobetes bacterium
1	root	cellular organisms	Bacteria	Proteobacteria	Betaproteobacteria	Burkholderiales	Burkholderiales genera incertae sedis	Aquabacterium	Aquabacterium soli
1	root	cellular organisms	Bacteria	FCB group	Bacteroidetes/Chlorobi group	Bacteroidetes	Cytophagia	Cytophagales	Cytophagaceae	Aquirufa	Aquirufa beregesia
1	root	cellular organisms	Bacteria	Proteobacteria	delta/epsilon subdivisions	Deltaproteobacteria	Myxococcales	Cystobacterineae	Myxococcaceae	Corallococcus	unclassified Corallococcus	Corallococcus sp. AB045
1	root	cellular organisms	Bacteria	Terrabacteria group	Firmicutes	Bacilli	Bacillales	Listeriaceae	Listeria
1	root	cellular organisms	Bacteria	Proteobacteria	Gammaproteobacteria	Oceanospirillales	Halomonadaceae	Halomonas	unclassified Halomonas	Halomonas sp. FME20
1	root	cellular organisms	Eukaryota	Opisthokonta	Fungi	Dikarya	Ascomycota	saccharomyceta	Pezizomycotina	leotiomyceta	dothideomyceta	Dothideomycetes	Pleosporomycetidae	Pleosporales	Lindgomycetaceae	Clohesyomyces	Clohesyomyces aquaticus
1	root	cellular organisms	Bacteria	Terrabacteria group	Firmicutes	Bacilli	Bacillales	Paenibacillaceae	Paenibacillus	Paenibacillus antri
2	root	cellular organisms	Bacteria	Proteobacteria	Alphaproteobacteria	Rhodobacterales	Roseobacteraceae	Loktanella	unclassified Loktanella	Loktanella sp. SALINAS62
1	root	cellular organisms	Bacteria	Terrabacteria group	Firmicutes	Clostridia	Eubacteriales	Clostridiaceae	Clostridium	Clostridium cavendishii
5	root	cellular organisms	Bacteria	PVC group	Planctomycetes	Planctomycetia	Pirellulales	Pirellulaceae	Blastopirellula	Blastopirellula marina
1	root	cellular organisms	Bacteria	Terrabacteria group	Firmicutes	Clostridia	Thermoanaerobacterales	Thermoanaerobacteraceae	Carboxydothermus	Carboxydothermus pertinax
1	root	cellular organisms	Eukaryota	Opisthokonta	Fungi	Dikarya	Ascomycota	saccharomyceta	Pezizomycotina	leotiomyceta	sordariomyceta	Leotiomycetes	Helotiales	Sclerotiniaceae	Botrytis	Botrytis hyacinthi
1	root	cellular organisms	Bacteria	Terrabacteria group	Actinobacteria	Actinomycetia	Micromonosporales	Micromonosporaceae	Micromonospora	Micromonospora craniellae
2	root	cellular organisms	Bacteria	Terrabacteria group	Firmicutes	Clostridia	Eubacteriales	Lachnospiraceae	Anaerotignum	Anaerotignum propionicum
1	root	cellular organisms	Bacteria	Proteobacteria	Gammaproteobacteria	Xanthomonadales	Xanthomonadaceae	Xanthomonas	unclassified Xanthomonas	Xanthomonas sp. LMG 12462
1	root	cellular organisms	Bacteria	Proteobacteria	Alphaproteobacteria	Rhodobacterales	Roseobacteraceae	Pseudoruegeria	unclassified Pseudoruegeria	Pseudoruegeria sp. HB172150
2	root	cellular organisms	Bacteria	Proteobacteria	Alphaproteobacteria	Hyphomicrobiales	Bradyrhizobiaceae	Nitrobacter	Nitrobacter winogradskyi
1	root	cellular organisms	Archaea	Euryarchaeota	Stenosarchaea group	Methanomicrobia	Methanosarcinales	Methanosarcinaceae	Methanolobus	Methanolobus vulcani
1	root	cellular organisms	Bacteria	Terrabacteria group	Firmicutes	Clostridia	Eubacteriales	Clostridiaceae	Clostridium	unclassified Clostridium	Clostridium sp. AM34-11AC
1	root	cellular organisms	Bacteria	PVC group	Candidatus Omnitrophica	unclassified Candidatus Omnitrophica	Omnitrophica WOR_2 bacterium RIFCSPLOWO2_02_FULL_50_19
1	root	cellular organisms	Archaea	Euryarchaeota	Stenosarchaea group	Methanomicrobia	Methanotrichales	Methanotrichaceae	Methanothrix	Methanothrix soehngenii	Methanothrix soehngenii GP6
1	root	cellular organisms	Bacteria	Spirochaetes	Spirochaetia	Spirochaetales	Treponemataceae	Treponema
1	root	cellular organisms	Bacteria	Proteobacteria	Alphaproteobacteria	unclassified Alphaproteobacteria	Alphaproteobacteria bacterium HGW-Alphaproteobacteria-2
2	root	cellular organisms	Bacteria	Terrabacteria group	Actinobacteria	Actinomycetia	Micrococcales	Microbacteriaceae	Microbacterium	unclassified Microbacterium	Microbacterium sp. 18062
1	root	cellular organisms	Bacteria	FCB group	Bacteroidetes/Chlorobi group	Bacteroidetes	unclassified Bacteroidetes	Bacteroidetes bacterium CG_4_10_14_3_um_filter_31_20
1	root	cellular organisms	Bacteria	Acidobacteria	Acidobacteriia	Acidobacteriales	Acidobacteriaceae	Granulicella	Granulicella arctica
1	root	cellular organisms	Bacteria	Proteobacteria	Alphaproteobacteria	Hyphomicrobiales	Phyllobacteriaceae	Mesorhizobium	unclassified Mesorhizobium	Mesorhizobium sp. L-2-11
2	root	cellular organisms	Bacteria	FCB group	Bacteroidetes/Chlorobi group	Bacteroidetes	Bacteroidia	Bacteroidales	Bacteroidaceae	Bacteroides	Bacteroides neonati
1	root	cellular organisms	Bacteria	Proteobacteria	Alphaproteobacteria	Rhodobacterales	Rhodobacteraceae	Phaeovulum	Phaeovulum veldkampii	Phaeovulum veldkampii DSM 11550
1	root	cellular organisms	Bacteria	FCB group	Bacteroidetes/Chlorobi group	Bacteroidetes	Flavobacteriia	Flavobacteriales	Flavobacteriaceae	Flavobacterium	unclassified Flavobacterium	Flavobacterium sp. BFFFF2
2	root	cellular organisms	Bacteria	Bacteria incertae sedis	Bacteria candidate phyla	Patescibacteria group	Parcubacteria group	Candidatus Magasanikbacteria	Candidatus Magasanikbacteria bacterium GW2011_GWC2_34_16
1	root	cellular organisms	Bacteria	Terrabacteria group	Actinobacteria	Actinomycetia	Micrococcales	Micrococcaceae	Kocuria	unclassified Kocuria	Kocuria sp. ICS0012
1	root	cellular organisms	Bacteria	Proteobacteria	Alphaproteobacteria	Hyphomicrobiales	Methylobacteriaceae	Methylobacterium	Methylobacterium symbioticum
2	root	cellular organisms	Bacteria	PVC group	Candidatus Omnitrophica	unclassified Candidatus Omnitrophica	Candidatus Omnitrophica bacterium CG11_big_fil_rev_8_21_14_0_20_64_10
1	root	cellular organisms	Bacteria	FCB group	Bacteroidetes/Chlorobi group	Bacteroidetes	Flavobacteriia	Flavobacteriales	Flavobacteriaceae	Aggregatimonas	Aggregatimonas sangjinii
1	root	cellular organisms	Bacteria	FCB group	Bacteroidetes/Chlorobi group	Bacteroidetes	Flavobacteriia	Flavobacteriales	Flavobacteriaceae	Pseudozobellia	Pseudozobellia thermophila
1	root	cellular organisms	Bacteria	Proteobacteria	Gammaproteobacteria	Alteromonadales	Alteromonadaceae	unclassified Alteromonadaceae	Alteromonadaceae bacterium 2753L.S.0a.02
2	root	cellular organisms	Bacteria	Proteobacteria	delta/epsilon subdivisions	Deltaproteobacteria	Myxococcales	Cystobacterineae	Anaeromyxobacteraceae	Anaeromyxobacter	unclassified Anaeromyxobacter	Anaeromyxobacter sp. RBG_16_69_14
1	root	cellular organisms	Bacteria	Proteobacteria	Alphaproteobacteria	Sphingomonadales	Sphingomonadaceae	Sphingomonas	Sphingomonas elodea
2	root	cellular organisms	Bacteria	Proteobacteria	Alphaproteobacteria	Hyphomicrobiales	Hyphomicrobiaceae	Rhodoplanes
1	root	cellular organisms	Bacteria	Proteobacteria	Alphaproteobacteria	Hyphomicrobiales	Brucellaceae	Falsochrobactrum	unclassified Falsochrobactrum	Falsochrobactrum sp. TDYN1
4	root	cellular organisms	Bacteria	Proteobacteria	Betaproteobacteria	Burkholderiales	Burkholderiaceae	Cupriavidus	Cupriavidus taiwanensis
1	root	cellular organisms	Bacteria	Proteobacteria	Betaproteobacteria	Burkholderiales	Comamonadaceae	Polaromonas	Polaromonas jejuensis
2	root	Viruses	Duplodnaviria	Heunggongvirae	Uroviricota	Caudoviricetes	Caudovirales	Myoviridae	unclassified Myoviridae	Erwinia phage pEa_SNUABM_54
3	root	cellular organisms	Bacteria	FCB group	Bacteroidetes/Chlorobi group	Bacteroidetes	Bacteroidia	Bacteroidales	Tannerellaceae	Parabacteroides	Parabacteroides goldsteinii
1	root	cellular organisms	Eukaryota	Opisthokonta	Fungi	Dikarya	Basidiomycota	Agaricomycotina	Agaricomycetes	Agaricomycetidae	Agaricales	Strophariaceae	Psilocybe	Psilocybe cf. subviscida
1	root	cellular organisms	Bacteria	Proteobacteria	Gammaproteobacteria	Pasteurellales	Psittacicellaceae	Psittacicella	Psittacicella hinzii
1	root	cellular organisms	Bacteria	Bacteria incertae sedis	Bacteria candidate phyla	Patescibacteria group	Microgenomates group	Candidatus Shapirobacteria	Candidatus Shapirobacteria bacterium GW2011_GWF1_38_23
1	root	cellular organisms	Bacteria	Proteobacteria	Betaproteobacteria	Nitrosomonadales	Thiobacillaceae	Thiobacillus	unclassified Thiobacillus	Thiobacillus sp. 65-29
1	root	cellular organisms	Archaea	Euryarchaeota	unclassified Euryarchaeota	Euryarchaeota archaeon ADurb.Bin190
2	root	cellular organisms	Bacteria	FCB group	Bacteroidetes/Chlorobi group	Bacteroidetes	Cytophagia	Cytophagales	Hymenobacteraceae	Pontibacter	Pontibacter mangrovi
1	root	cellular organisms	Bacteria	Proteobacteria	Betaproteobacteria	Neisseriales	Chromobacteriaceae	Jeongeupia
1	root	cellular organisms	Bacteria	Terrabacteria group	Actinobacteria	Actinomycetia	Pseudonocardiales	Pseudonocardiaceae	Saccharothrix	Saccharothrix violaceirubra
1	root	cellular organisms	Bacteria	Proteobacteria	Alphaproteobacteria	Sphingomonadales	Erythrobacteraceae	Altererythrobacter	Altererythrobacter xiamenensis
1	root	cellular organisms	Bacteria	FCB group	Bacteroidetes/Chlorobi group	Bacteroidetes	Bacteroidia	Bacteroidales	Bacteroidaceae	Bacteroides	unclassified Bacteroides	Bacteroides sp. 214
1	root	cellular organisms	Bacteria	Terrabacteria group	Firmicutes	Tissierellia	Tissierellales	Gottschalkiaceae	Andreesenia	Andreesenia angusta
4	root	cellular organisms	Bacteria	Proteobacteria	Betaproteobacteria	Betaproteobacteria incertae sedis	Candidatus Accumulibacter	unclassified Candidatus Accumulibacter	Candidatus Accumulibacter sp. SK-01
1	root	cellular organisms	Bacteria	Proteobacteria	Alphaproteobacteria	Hyphomicrobiales	Phyllobacteriaceae	Mesorhizobium	Mesorhizobium terrae
1	root	cellular organisms	Bacteria	PVC group	Verrucomicrobia	Opitutae	Opitutales	Opitutaceae	Nibricoccus	Nibricoccus aquaticus
1	root	cellular organisms	Bacteria	Terrabacteria group	Chloroflexi	Ardenticatenia	Ardenticatenales	Ardenticatenaceae	Candidatus Promineofilum	Candidatus Promineofilum breve
1	root	cellular organisms	Bacteria	Bacteria incertae sedis	Bacteria candidate phyla	candidate division WOR-3	candidate division WOR_3 bacterium SM1_77
1	root	cellular organisms	Bacteria	Proteobacteria	Alphaproteobacteria	Hyphomicrobiales	Notoacmeibacteraceae	Notoacmeibacter	Notoacmeibacter ruber
2	root	cellular organisms	Bacteria	PVC group	Planctomycetes	Phycisphaerae	unclassified Phycisphaerae
1	root	cellular organisms	Bacteria	Terrabacteria group	Firmicutes	Bacilli	Bacillales	Paenibacillaceae	Paenibacillus	Paenibacillus wynnii
1	root	cellular organisms	Bacteria	Proteobacteria	Betaproteobacteria	Neisseriales	Chromobacteriaceae	Chitinibacter	Chitinibacter fontanus
1	root	cellular organisms	Bacteria	Proteobacteria	Zetaproteobacteria	Mariprofundales	Mariprofundaceae	Mariprofundus	Mariprofundus erugo
1	root	cellular organisms	Bacteria	Proteobacteria	Betaproteobacteria	Burkholderiales	Burkholderiales genera incertae sedis	Rhizobacter	unclassified Rhizobacter	Rhizobacter sp. Root1221
1	root	cellular organisms	Bacteria	Proteobacteria	Gammaproteobacteria	Pseudomonadales	Pseudomonadaceae	Pseudomonas	Pseudomonas chlororaphis group	Pseudomonas fragi
1	root	cellular organisms	Bacteria	Proteobacteria	Gammaproteobacteria	unclassified Gammaproteobacteria	Gammaproteobacteria bacterium HGW-Gammaproteobacteria-8
3	root	cellular organisms	Bacteria	Proteobacteria	Alphaproteobacteria	Sphingomonadales	Sphingomonadaceae	Sphingopyxis	unclassified Sphingopyxis	Sphingopyxis sp. LK2115
3	root	cellular organisms	Bacteria	Proteobacteria	Alphaproteobacteria	Sphingomonadales	Sphingomonadaceae	Sphingobium	Sphingobium indicum
1	root	cellular organisms	Bacteria	FCB group	Bacteroidetes/Chlorobi group	Chlorobi	Chlorobia	Chlorobiales	Chlorobiaceae	Chlorobaculum	Chlorobaculum tepidum
1	root	cellular organisms	Bacteria	Bacteria incertae sedis	Bacteria candidate phyla	Candidatus Eisenbacteria	Candidatus Eisenbacteria bacterium RBG_16_71_46
1	root	cellular organisms	Bacteria	Terrabacteria group	Actinobacteria	Actinomycetia	Streptomycetales	Streptomycetaceae	Streptomyces	Streptomyces griseoflavus	Streptomyces griseoflavus Tu4000
1	root	cellular organisms	Bacteria	Terrabacteria group	Actinobacteria	Actinomycetia	Corynebacteriales	Mycobacteriaceae	Mycobacterium	Mycobacterium aquaticum
1	root	cellular organisms	Bacteria	Proteobacteria	Alphaproteobacteria	Rhodobacterales	Roseobacteraceae	Roseovarius	Roseovarius nubinhibens
1	root	cellular organisms	Bacteria	FCB group	Bacteroidetes/Chlorobi group	Bacteroidetes	Flavobacteriia	Flavobacteriales	Flavobacteriaceae	Flavobacterium	unclassified Flavobacterium	Flavobacterium sp. KBS0721
1	root	cellular organisms	Bacteria	FCB group	Bacteroidetes/Chlorobi group	Bacteroidetes	Flavobacteriia	Flavobacteriales	Flavobacteriaceae	Olleya
1	root	cellular organisms	Bacteria	FCB group	Bacteroidetes/Chlorobi group	Bacteroidetes	Bacteroidia	Bacteroidales	Prevotellaceae	Prevotella	Prevotella falsenii
2	root	cellular organisms	Bacteria	Proteobacteria	Gammaproteobacteria	Oceanospirillales	Balneatrichaceae	Pokkaliibacter	Pokkaliibacter plantistimulans
1	root	cellular organisms	Bacteria	Proteobacteria	delta/epsilon subdivisions	Deltaproteobacteria	Desulfuromonadales	Geobacteraceae	Geomonas	Geomonas propionica
1	root	cellular organisms	Bacteria	Terrabacteria group	Firmicutes	Bacilli	Bacillales	Paenibacillaceae	Paenibacillus	Paenibacillus mesophilus
1	root	cellular organisms	Bacteria	Terrabacteria group	Cyanobacteria/Melainabacteria group	Cyanobacteria	Oscillatoriophycideae	Oscillatoriales	unclassified Oscillatoriales	Oscillatoriales cyanobacterium
1	root	cellular organisms	Bacteria	Proteobacteria	Betaproteobacteria	Burkholderiales	Comamonadaceae	Acidovorax	unclassified Acidovorax	Acidovorax sp. 56
1	root	cellular organisms	Bacteria	Proteobacteria	Alphaproteobacteria	Rhodospirillales	Thalassobaculaceae	Nisaea	Nisaea denitrificans
1	root	cellular organisms	Bacteria	Proteobacteria	delta/epsilon subdivisions	Deltaproteobacteria	Desulfovibrionales	Desulfovibrionaceae	Pseudodesulfovibrio	unclassified Pseudodesulfovibrio	Pseudodesulfovibrio sp. JC047
1	root	cellular organisms	Bacteria	Proteobacteria	Alphaproteobacteria	Rhodobacterales	Roseobacteraceae	Loktanella	unclassified Loktanella	Loktanella sp. 3ANDIMAR09
1	root	cellular organisms	Bacteria	Proteobacteria	Alphaproteobacteria	Rhodobacterales	Rhodobacteraceae	Haematobacter
1	root	cellular organisms	Bacteria	Proteobacteria	Betaproteobacteria	Burkholderiales	Burkholderiaceae	Burkholderia	Burkholderia cepacia complex	Burkholderia contaminans
1	root	cellular organisms	Bacteria	Proteobacteria	Betaproteobacteria	Burkholderiales	Oxalobacteraceae	Collimonas	Collimonas arenae
1	root	cellular organisms	Bacteria	FCB group	Bacteroidetes/Chlorobi group	Bacteroidetes	Bacteroidia	Bacteroidales	Odoribacteraceae	Odoribacter	Odoribacter splanchnicus
1	root	cellular organisms	Bacteria	Terrabacteria group	Firmicutes	Bacilli	Bacillales	Planococcaceae	Sporosarcina	unclassified Sporosarcina
1	root	cellular organisms	Bacteria	Proteobacteria	Alphaproteobacteria	Rhodobacterales	Roseobacteraceae	Maritimibacter	unclassified Maritimibacter	Maritimibacter sp. 55A14
1	root	cellular organisms	Bacteria	Proteobacteria	Alphaproteobacteria	Alphaproteobacteria incertae sedis	Micavibrio	unclassified Micavibrio	Micavibrio sp. TMED2
3	root	cellular organisms	Bacteria	FCB group	Bacteroidetes/Chlorobi group	Bacteroidetes	Flavobacteriia	Flavobacteriales	Cryomorphaceae	unclassified Cryomorphaceae	Cryomorphaceae bacterium
1	root	cellular organisms	Bacteria	Proteobacteria	Betaproteobacteria	Neisseriales	unclassified Neisseriales	Neisseriales bacterium
1	root	cellular organisms	Bacteria	Proteobacteria	delta/epsilon subdivisions	Deltaproteobacteria	Desulfobacterales	Desulfocapsaceae	Desulforhopalus	Desulforhopalus vacuolatus
1	root	cellular organisms	Bacteria	FCB group	Bacteroidetes/Chlorobi group	Bacteroidetes	Cytophagia	Cytophagales	Thermonemataceae	Thermonema	Thermonema lapsum
1	root	Viruses	Duplodnaviria	Heunggongvirae	Uroviricota	Caudoviricetes	Caudovirales	Podoviridae	unclassified Podoviridae	Podoviridae sp. ctY3D12
1	root	cellular organisms	Bacteria	Terrabacteria group	Firmicutes	Erysipelotrichia	Erysipelotrichales	Erysipelotrichaceae	Massilimicrobiota
1	root	cellular organisms	Bacteria	Terrabacteria group	Actinobacteria	Actinomycetia	Geodermatophilales	Geodermatophilaceae	Blastococcus
2	root	cellular organisms	Bacteria	Proteobacteria	Betaproteobacteria	Burkholderiales	Burkholderiales genera incertae sedis	Inhella	Inhella proteolytica
2	root	cellular organisms	Bacteria	FCB group	Bacteroidetes/Chlorobi group	Bacteroidetes	Cytophagia	Cytophagales	Bernardetiaceae	Hugenholtzia	Hugenholtzia roseola
2	root	cellular organisms	Bacteria	Terrabacteria group	Firmicutes	Clostridia	Eubacteriales	Lachnospiraceae	Epulopiscium	unclassified Epulopiscium	Epulopiscium sp. Nele67-Bin004
6	root	cellular organisms	Bacteria	FCB group	Bacteroidetes/Chlorobi group	Bacteroidetes	Bacteroidia	Marinilabiliales	Marinilabiliaceae	Carboxylicivirga	Carboxylicivirga linearis
2	root	cellular organisms	Bacteria	Proteobacteria	Betaproteobacteria	Burkholderiales	Oxalobacteraceae	unclassified Oxalobacteraceae	Oxalobacteraceae bacterium OM1
1	root	cellular organisms	Bacteria	FCB group	Bacteroidetes/Chlorobi group	Bacteroidetes	Flavobacteriia	Flavobacteriales	Crocinitomicaceae	Brumimicrobium
1	root	cellular organisms	Bacteria	Proteobacteria	Betaproteobacteria	Burkholderiales	Burkholderiaceae	Caballeronia	Caballeronia sordidicola
2	root	cellular organisms	Bacteria	Proteobacteria	Betaproteobacteria	Neisseriales	Chromobacteriaceae	Chromobacterium group	Chromobacterium	unclassified Chromobacterium	Chromobacterium sp. ATCC 53434
1	root	Viruses	Duplodnaviria	Heunggongvirae	Uroviricota	Caudoviricetes	Caudovirales	Myoviridae	unclassified Myoviridae	Xanthomonas phage Xoo-sp14
1	root	cellular organisms	Bacteria	Proteobacteria	Alphaproteobacteria	Rhodobacterales	Rhodobacteraceae	unclassified Rhodobacteraceae	Rhodobacteraceae bacterium GWF1_65_7
1	root	cellular organisms	Bacteria	Proteobacteria	Gammaproteobacteria	Oceanospirillales	Oceanospirillaceae	Neptunomonas	Neptunomonas concharum
1	root	cellular organisms	Bacteria	Terrabacteria group	Actinobacteria	Actinomycetia	Corynebacteriales	Nocardiaceae	Nocardia	Nocardia vinacea
1	root	cellular organisms	Bacteria	Proteobacteria	Gammaproteobacteria	Chromatiales	Ectothiorhodospiraceae	Halorhodospira	Halorhodospira neutriphila
1	root	cellular organisms	Bacteria	Terrabacteria group	Firmicutes	Bacilli	Bacillales	Paenibacillaceae	Cohnella	Cohnella candidum
2	root	cellular organisms	Bacteria	Terrabacteria group	Cyanobacteria/Melainabacteria group	Cyanobacteria	Oscillatoriophycideae	Oscillatoriales	Oscillatoriaceae	Okeania	unclassified Okeania	Okeania sp. KiyG1
1	root	cellular organisms	Bacteria	Bacteria incertae sedis	Bacteria candidate phyla	Patescibacteria group	Parcubacteria group	Candidatus Kerfeldbacteria	Candidatus Kerfeldbacteria bacterium RIFCSPHIGHO2_12_FULL_48_17
2	root	cellular organisms	Bacteria	Synergistetes	Synergistia	Synergistales	Synergistaceae	Acetomicrobium
2	root	cellular organisms	Bacteria	Fusobacteria	Fusobacteriia	Fusobacteriales	Leptotrichiaceae	Sneathia
1	root	cellular organisms	Bacteria	FCB group	Bacteroidetes/Chlorobi group	Bacteroidetes	Flavobacteriia	Flavobacteriales	Weeksellaceae	Chryseobacterium group	Chryseobacterium	Chryseobacterium piscicola
1	root	cellular organisms	Bacteria	Proteobacteria	Alphaproteobacteria	Rhodospirillales	Azospirillaceae	Azospirillum	unclassified Azospirillum	Azospirillum sp. SYSU D00513
1	root	cellular organisms	Bacteria	Terrabacteria group	Firmicutes	Clostridia	Eubacteriales	Clostridiaceae	Clostridium	Clostridium butyricum
1	root	cellular organisms	Bacteria	Terrabacteria group	Firmicutes	Bacilli	Bacillales	Paenibacillaceae	Paenibacillus	Paenibacillus hemerocallicola
1	root	cellular organisms	Bacteria	Terrabacteria group	Actinobacteria	Actinomycetia	Streptosporangiales	Nocardiopsaceae
4	root	cellular organisms	Bacteria	Proteobacteria	Betaproteobacteria	Nitrosomonadales	Methylophilaceae	Methylovorus	Methylovorus glucosotrophus
1	root	cellular organisms	Eukaryota	Opisthokonta	Fungi	Dikarya	Ascomycota	saccharomyceta	Pezizomycotina	leotiomyceta	Eurotiomycetes	Eurotiomycetidae	Eurotiales	Aspergillaceae	Penicillium	Penicillium oxalicum	Penicillium oxalicum 114-2
1	root	cellular organisms	Bacteria	Proteobacteria	Alphaproteobacteria	Hyphomicrobiales	Methylobacteriaceae	Microvirga	Microvirga subterranea
1	root	cellular organisms	Bacteria	Terrabacteria group	Firmicutes	Bacilli	Bacillales	Bacillaceae	Halobacillus	Halobacillus mangrovi
1	root	cellular organisms	Bacteria	Proteobacteria	Alphaproteobacteria	Rhodospirillales	Rhodospirillaceae	Pararhodospirillum	Pararhodospirillum photometricum	Pararhodospirillum photometricum DSM 122
1	root	cellular organisms	Bacteria	Proteobacteria	Betaproteobacteria	Burkholderiales	Comamonadaceae	Ramlibacter	unclassified Ramlibacter	Ramlibacter sp. H242
1	root	cellular organisms	Bacteria	Terrabacteria group	Actinobacteria	Actinomycetia	Corynebacteriales	Mycobacteriaceae	Mycobacterium	Mycobacterium ulcerans	Mycobacterium ulcerans str. Harvey
5	root	cellular organisms	Bacteria	Terrabacteria group	Firmicutes	unclassified Firmicutes sensu stricto	Firmicutes bacterium ADurb.Bin182
1	root	cellular organisms	Eukaryota	Opisthokonta	Fungi	Dikarya	Basidiomycota	Agaricomycotina	Agaricomycetes	Agaricomycetes incertae sedis	Polyporales	Polyporaceae	Trametes	Trametes maxima
2	root	cellular organisms	Bacteria	Proteobacteria	Alphaproteobacteria	Sphingomonadales	Sphingomonadaceae	Sphingomonas	unclassified Sphingomonas	Sphingomonas sp. Leaf37
1	root	cellular organisms	Bacteria	Proteobacteria	Gammaproteobacteria	unclassified Gammaproteobacteria	gamma proteobacterium HTCC5015
2	root	cellular organisms	Bacteria	Terrabacteria group	Firmicutes	Clostridia	Thermoanaerobacterales	Thermoanaerobacterales Family III. Incertae Sedis	Caldicellulosiruptor	Caldicellulosiruptor naganoensis
1	root	cellular organisms	Bacteria	Terrabacteria group	Actinobacteria	Actinomycetia	Micrococcales	Intrasporangiaceae	Phycicoccus	Phycicoccus duodecadis
2	root	cellular organisms	Bacteria	unclassified Bacteria	bacterium 1XD42-54
1	root	cellular organisms	Bacteria	Proteobacteria	Gammaproteobacteria	Chromatiales	Ectothiorhodospiraceae	Thiohalospira	Thiohalospira halophila
2	root	cellular organisms	Bacteria	Terrabacteria group	Actinobacteria	Actinomycetia	Micrococcales	Microbacteriaceae
1	root	cellular organisms	Bacteria	Spirochaetes	Spirochaetia	Spirochaetales	Spirochaetaceae
1	root	cellular organisms	Bacteria	Terrabacteria group	Actinobacteria	unclassified Actinobacteria	Actinobacteria bacterium HGW-Actinobacteria-10
1	root	cellular organisms	Bacteria	Proteobacteria	Gammaproteobacteria	Oceanospirillales	Halomonadaceae	Halomonas	Halomonas meridiana
1	root	cellular organisms	Bacteria	FCB group	Bacteroidetes/Chlorobi group	Bacteroidetes	Bacteroidia	Bacteroidales	Bacteroidaceae	Bacteroides	unclassified Bacteroides	Bacteroides sp. HPS0048
1	root	cellular organisms	Bacteria	Terrabacteria group	Actinobacteria	Actinomycetia	Corynebacteriales	Gordoniaceae	Gordonia	Gordonia hydrophobica
2	root	cellular organisms	Bacteria	PVC group	Verrucomicrobia	Verrucomicrobiae	Verrucomicrobiales	Verrucomicrobiaceae	Verrucomicrobium	unclassified Verrucomicrobium	Verrucomicrobium sp. 3C
2	root	cellular organisms	Bacteria	Proteobacteria	Betaproteobacteria	Burkholderiales	Burkholderiaceae	Burkholderia	Burkholderia cepacia complex	Burkholderia territorii
4	root	cellular organisms	Bacteria	Proteobacteria	Gammaproteobacteria	Methylococcales	Methylococcaceae	Methylicorpusculum	Methylicorpusculum oleiharenae
1	root	cellular organisms	Bacteria	FCB group	Bacteroidetes/Chlorobi group	Bacteroidetes	Bacteroidia	Bacteroidales	Bacteroidaceae	Bacteroides	Bacteroides nordii
1	root	cellular organisms	Bacteria	Proteobacteria	Alphaproteobacteria	Hyphomicrobiales	Methylobacteriaceae	Methylobacterium	Methylobacterium nodulans	Methylobacterium nodulans ORS 2060
1	root	cellular organisms	Bacteria	FCB group	Bacteroidetes/Chlorobi group	Bacteroidetes	Bacteroidia	Bacteroidales	Prevotellaceae	Prevotella	Prevotella nigrescens
1	root	cellular organisms	Bacteria	Proteobacteria	Alphaproteobacteria	Rhodospirillales	Elioraeaceae	Elioraea	Elioraea thermophila
1	root	cellular organisms	Bacteria	Terrabacteria group	Firmicutes	Bacilli	Bacillales	Paenibacillaceae	Paenibacillus	Paenibacillus athensensis
3	root	cellular organisms	Bacteria	FCB group	Bacteroidetes/Chlorobi group	Bacteroidetes	Cytophagia	Cytophagales	Spirosomaceae	Flectobacillus	Flectobacillus major
2	root	cellular organisms	Bacteria	Proteobacteria	Betaproteobacteria	Burkholderiales	Burkholderiaceae	Burkholderia	Burkholderia cepacia complex	Burkholderia aenigmatica
1	root	cellular organisms	Bacteria	FCB group	Bacteroidetes/Chlorobi group	Bacteroidetes	Flavobacteriia	Flavobacteriales	Flavobacteriaceae	Flavobacterium	Flavobacterium glaciei
1	root	cellular organisms	Eukaryota	Rhodophyta	Florideophyceae	Rhodymeniophycidae	Gracilariales	Gracilariaceae
1	root	cellular organisms	Bacteria	Proteobacteria	Gammaproteobacteria	Aeromonadales	Aeromonadaceae	Aeromonas	Aeromonas jandaei
1	root	cellular organisms	Bacteria	Terrabacteria group	Firmicutes	Clostridia	Eubacteriales	Syntrophomonadaceae	Candidatus Syntrophocurvum	Candidatus Syntrophocurvum alkaliphilum
1	root	cellular organisms	Bacteria	FCB group	Bacteroidetes/Chlorobi group	Bacteroidetes	Flavobacteriia	Flavobacteriales	Weeksellaceae	Chryseobacterium group	Chryseobacterium	Chryseobacterium nakagawai
1	root	cellular organisms	Bacteria	Proteobacteria	Alphaproteobacteria	Rhodobacterales	Roseobacteraceae	Roseovarius	unclassified Roseovarius	Roseovarius sp. A-2
2	root	cellular organisms	Bacteria	Terrabacteria group	Actinobacteria	Actinomycetia	Micrococcales	Micrococcaceae
1	root	cellular organisms	Bacteria	Terrabacteria group	Actinobacteria	Actinomycetia	Streptosporangiales	Streptosporangiaceae	Nonomuraea	Nonomuraea pusilla
2	root	cellular organisms	Bacteria	Proteobacteria	Betaproteobacteria	Betaproteobacteria incertae sedis	Chitinivorax	unclassified Chitinivorax	Chitinivorax sp. B
2	root	cellular organisms	Bacteria	Proteobacteria	Betaproteobacteria	Burkholderiales	Comamonadaceae	Azohydromonas	Azohydromonas caseinilytica
1	root	cellular organisms	Archaea	Euryarchaeota	Stenosarchaea group	Methanomicrobia	Methanosarcinales	Methanosarcinaceae	Methanolobus	Methanolobus tindarius	Methanolobus tindarius DSM 2278
2	root	cellular organisms	Bacteria	Proteobacteria	Betaproteobacteria	Burkholderiales	Oxalobacteraceae	unclassified Oxalobacteraceae	Oxalobacteraceae bacterium
1	root	cellular organisms	Bacteria	Proteobacteria	Alphaproteobacteria	Hyphomicrobiales	Phyllobacteriaceae	Hoeflea	unclassified Hoeflea	Hoeflea sp. BRH_c9
2	root	cellular organisms	Bacteria	Proteobacteria	Alphaproteobacteria	Rhodobacterales	Rhodobacteraceae	Paracoccus	unclassified Paracoccus (in: Bacteria)	Paracoccus sp. XHP0099
1	root	cellular organisms	Bacteria	PVC group	Planctomycetes	Planctomycetia	Pirellulales	Lacipirellulaceae
2	root	cellular organisms	Bacteria	Proteobacteria	Alphaproteobacteria	Sphingomonadales	Sphingomonadaceae	Sphingomonas	Sphingomonas colocasiae
3	root	Viruses	Duplodnaviria	Heunggongvirae	Uroviricota	Caudoviricetes	Caudovirales	Podoviridae	unclassified Podoviridae	Rhodoferax phage P26218
1	root	cellular organisms	Bacteria	Terrabacteria group	Actinobacteria	Actinomycetia	Micrococcales	Microbacteriaceae	Leucobacter	Leucobacter viscericola
4	root	cellular organisms	Bacteria	Terrabacteria group	Firmicutes	Bacilli	Lactobacillales	Streptococcaceae	Streptococcus	Streptococcus pneumoniae
1	root	cellular organisms	Bacteria	Proteobacteria	Alphaproteobacteria	Hyphomicrobiales	Boseaceae	Bosea	unclassified Bosea	Bosea sp. LC85
1	root	cellular organisms	Bacteria	Terrabacteria group	Actinobacteria	Coriobacteriia	Coriobacteriales	Coriobacteriaceae	Coriobacterium	Coriobacterium glomerans
2	root	cellular organisms	Eukaryota	Viridiplantae	Chlorophyta	core chlorophytes	Chlorophyceae	CS clade	Chlamydomonadales	Chlamydomonadaceae	Chlamydomonas
1	root	cellular organisms	Bacteria	Proteobacteria	Gammaproteobacteria	Xanthomonadales	Xanthomonadaceae	Stenotrophomonas	Stenotrophomonas ginsengisoli
2	root	cellular organisms	Bacteria	Terrabacteria group	Firmicutes	Clostridia	Eubacteriales	Peptococcaceae	Desulfosporosinus	Desulfosporosinus orientis
3	root	cellular organisms	Bacteria	FCB group	Candidatus Cloacimonetes	unclassified Candidatus Cloacimonetes	Candidatus Cloacimonetes bacterium ADurb.Bin211
1	root	cellular organisms	Bacteria	Proteobacteria	delta/epsilon subdivisions	Deltaproteobacteria	Desulfovibrionales	Desulfovibrionaceae	Lawsonia	Lawsonia intracellularis	Lawsonia intracellularis PHE/MN1-00
1	root	cellular organisms	Bacteria	Proteobacteria	Alphaproteobacteria	Rhodospirillales	Rhodospirillaceae	Telmatospirillum	Telmatospirillum siberiense
1	root	cellular organisms	Bacteria	Terrabacteria group	Actinobacteria	Actinomycetia	Corynebacteriales	Mycobacteriaceae	Mycobacteroides	Mycobacteroides abscessus	Mycobacteroides abscessus subsp. massiliense
1	root	cellular organisms	Bacteria	Terrabacteria group	Actinobacteria	Actinomycetia	Streptomycetales	Streptomycetaceae	Streptomyces	Streptomyces violaceusniger group	Streptomyces iranensis
3	root	cellular organisms	Bacteria	Terrabacteria group	Firmicutes	Clostridia	Eubacteriales	Peptostreptococcaceae	Clostridioides	Clostridioides difficile
1	root	cellular organisms	Bacteria	Synergistetes	Synergistia	Synergistales	Synergistaceae	Pyramidobacter	Pyramidobacter piscolens
3	root	cellular organisms	Bacteria	Proteobacteria	delta/epsilon subdivisions	Deltaproteobacteria	Desulfovibrionales	Desulfovibrionaceae	Desulfovibrio	Desulfovibrio sulfodismutans
1	root	cellular organisms	Eukaryota	Opisthokonta	Fungi	Fungi incertae sedis	Mucoromycota	Mortierellomycotina	Mortierellomycetes	Mortierellales	Mortierellaceae	Haplosporangium	unclassified Haplosporangium
1	root	cellular organisms	Bacteria	Proteobacteria	Alphaproteobacteria	Hyphomicrobiales	Xanthobacteraceae	Azorhizobium	Azorhizobium caulinodans
1	root	cellular organisms	Bacteria	Terrabacteria group	Actinobacteria	Actinomycetia	Streptosporangiales	Thermomonosporaceae	Actinomadura	unclassified Actinomadura	Actinomadura sp. CNU-125
1	root	cellular organisms	Bacteria	Terrabacteria group	Firmicutes	Bacilli	Lactobacillales	Lactobacillaceae	Companilactobacillus
1	root	cellular organisms	Eukaryota	Opisthokonta	Fungi	Dikarya	Basidiomycota	Agaricomycotina	Agaricomycetes	Phallomycetidae	Geastrales	Sphaerobolaceae	Sphaerobolus	Sphaerobolus stellatus	Sphaerobolus stellatus SS14
1	root	cellular organisms	Bacteria	Terrabacteria group	Actinobacteria	Actinomycetia	Bifidobacteriales	Bifidobacteriaceae	Bifidobacterium	Bifidobacterium xylocopae
1	root	cellular organisms	Bacteria	FCB group	Bacteroidetes/Chlorobi group	Bacteroidetes	Flavobacteriia	Flavobacteriales	Flavobacteriaceae	Zhouia	Zhouia amylolytica
1	root	cellular organisms	Bacteria	Proteobacteria	Betaproteobacteria	Burkholderiales	Burkholderiales genera incertae sedis	Leptothrix	Leptothrix mobilis
1	root	cellular organisms	Eukaryota	Opisthokonta	Fungi	Dikarya	Ascomycota	saccharomyceta	Pezizomycotina	leotiomyceta	sordariomyceta	Sordariomycetes	Hypocreomycetidae	Glomerellales	Glomerellaceae	Colletotrichum	Colletotrichum gloeosporioides species complex
1	root	cellular organisms	Bacteria	Terrabacteria group	Firmicutes	Bacilli	Bacillales	Paenibacillaceae	Paenibacillus	unclassified Paenibacillus	Paenibacillus sp. IB182496
5	root	cellular organisms	Bacteria	Proteobacteria	Betaproteobacteria	Burkholderiales	Burkholderiales genera incertae sedis	Tepidicella	Tepidicella xavieri
1	root	cellular organisms	Bacteria	FCB group	Bacteroidetes/Chlorobi group	Bacteroidetes	Flavobacteriia	Flavobacteriales	Weeksellaceae	Chryseobacterium group	Chryseobacterium	unclassified Chryseobacterium	Chryseobacterium sp. JUb44
2	root	cellular organisms	Bacteria	Nitrospinae/Tectomicrobia group	Candidatus Tectomicrobia	Candidatus Entotheonella
1	root	cellular organisms	Eukaryota	Opisthokonta	Fungi	Dikarya	Ascomycota	saccharomyceta	Pezizomycotina	Pezizomycetes	Pezizales	Morchellaceae	Morchella	Morchella sect. Distantes	Morchella importuna
1	root	cellular organisms	Bacteria	Proteobacteria	Alphaproteobacteria	Hyphomicrobiales	Rhizobiaceae	Sinorhizobium/Ensifer group	Ensifer	unclassified Ensifer	Ensifer sp. NBAIM29
1	root	cellular organisms	Bacteria	Terrabacteria group	Firmicutes	Clostridia	Eubacteriales	Oscillospiraceae	Ruminococcus	unclassified Ruminococcus	Ruminococcus sp. OA3
3	root	cellular organisms	Bacteria	Proteobacteria	Alphaproteobacteria	Rhodobacterales	Rhodobacteraceae	Paracoccus	Paracoccus halophilus
1	root	cellular organisms	Eukaryota	Opisthokonta	Fungi	Dikarya	Ascomycota	saccharomyceta	Saccharomycotina	Saccharomycetes	Saccharomycetales	Lipomycetaceae	Lipomyces	Lipomyces starkeyi	Lipomyces starkeyi NRRL Y-11557
1	root	cellular organisms	Bacteria	FCB group	Bacteroidetes/Chlorobi group	Bacteroidetes	Flavobacteriia	Flavobacteriales	Flavobacteriaceae	Winogradskyella	unclassified Winogradskyella	Winogradskyella sp. DF17
1	root	cellular organisms	Bacteria	Proteobacteria	Gammaproteobacteria	Vibrionales	Vibrionaceae	Photobacterium
1	root	cellular organisms	Bacteria	Proteobacteria	Alphaproteobacteria	Rhodospirillales	Rhodospirillaceae	Roseospira	Roseospira marina
1	root	cellular organisms	Bacteria	Terrabacteria group	Firmicutes	Clostridia	Eubacteriales	Oscillospiraceae	Monoglobus	Monoglobus pectinilyticus
1	root	cellular organisms	Bacteria	Terrabacteria group	Firmicutes	Bacilli	Bacillales	Bacillaceae	Bacillus	unclassified Bacillus (in: Bacteria)	Bacillus sp. OK048
1	root	cellular organisms	Bacteria	Proteobacteria	Betaproteobacteria	Burkholderiales	Comamonadaceae	unclassified Comamonadaceae
3	root	cellular organisms	Bacteria	Nitrospirae
1	root	Viruses	Duplodnaviria	Heunggongvirae	Uroviricota	Caudoviricetes	Caudovirales	Autographiviridae
1	root	cellular organisms	Bacteria	Proteobacteria	Alphaproteobacteria	Rhodobacterales	Rhodobacteraceae	Cereibacter
1	root	cellular organisms	Bacteria	Terrabacteria group	Firmicutes	Bacilli	Bacillales	Paenibacillaceae	Paenibacillus	Paenibacillus elgii
1	root	cellular organisms	Bacteria	Terrabacteria group	Firmicutes	Bacilli	Bacillales	Paenibacillaceae	Paenibacillus	Paenibacillus psychroresistens
1	root	cellular organisms	Bacteria	Proteobacteria	Betaproteobacteria	Rhodocyclales	Azonexaceae	Dechloromonas	unclassified Dechloromonas	Dechloromonas sp. H13
3	root	cellular organisms	Bacteria	Terrabacteria group	Firmicutes	Bacilli	Bacillales	Paenibacillaceae	Cohnella	unclassified Cohnella	Cohnella sp. NL03-T5
2	root	cellular organisms	Bacteria	FCB group	Bacteroidetes/Chlorobi group	Bacteroidetes	Cytophagia	Cytophagales	Hymenobacteraceae	Hymenobacter	Hymenobacter nivis
1	root	cellular organisms	Bacteria	Proteobacteria	Gammaproteobacteria	unclassified Gammaproteobacteria	methanotrophic bacterial endosymbiont of Bathymodiolus sp.
1	root	cellular organisms	Archaea	Euryarchaeota	Stenosarchaea group	Halobacteria	Natrialbales	Natrialbaceae	Natrarchaeobius	Natrarchaeobius chitinivorans
2	root	cellular organisms	Bacteria	Terrabacteria group	Tenericutes	unclassified Tenericutes	Tenericutes bacterium RIFOXYD12_FULL_36_9
1	root	cellular organisms	Bacteria	Terrabacteria group	Actinobacteria	unclassified Actinobacteria	Actinobacteria bacterium HGW-Actinobacteria-6
4	root	cellular organisms	Bacteria	Proteobacteria	delta/epsilon subdivisions	Deltaproteobacteria	Desulfuromonadales	unclassified Desulfuromonadales	Desulfuromonadales bacterium GWD2_61_12
2	root	cellular organisms	Bacteria	Proteobacteria	Betaproteobacteria	Burkholderiales	Alcaligenaceae	Bordetella	unclassified Bordetella
1	root	cellular organisms	Bacteria	PVC group	Chlamydiae	Chlamydiia	Parachlamydiales	Criblamydiaceae	Criblamydia	Criblamydia sequanensis
1	root	cellular organisms	Bacteria	FCB group	Bacteroidetes/Chlorobi group	Bacteroidetes	Bacteroidia	Bacteroidales	Prevotellaceae	Alloprevotella	unclassified Alloprevotella
2	root	cellular organisms	Bacteria	Proteobacteria	Alphaproteobacteria	Hyphomicrobiales	Hyphomicrobiaceae	Rhodomicrobium
1	root	cellular organisms	Bacteria	Terrabacteria group	Actinobacteria	Actinomycetia	Propionibacteriales	Propionibacteriaceae	Propioniciclava	Propioniciclava soli
1	root	cellular organisms	Bacteria	Proteobacteria	Betaproteobacteria	Nitrosomonadales	Gallionellaceae	Candidatus Nitrotoga	Candidatus Nitrotoga arctica
1	root	cellular organisms	Eukaryota	Opisthokonta	Fungi	Dikarya	Basidiomycota	Agaricomycotina	Agaricomycetes	Agaricomycetes incertae sedis	Cantharellales	Tulasnellaceae	Tulasnella	unclassified Tulasnella
3	root	cellular organisms	Bacteria	Terrabacteria group	Cyanobacteria/Melainabacteria group	Cyanobacteria	Oscillatoriophycideae	Oscillatoriales
2	root	cellular organisms	Bacteria	FCB group	Bacteroidetes/Chlorobi group	Bacteroidetes	Flavobacteriia	Flavobacteriales	Flavobacteriaceae	Mesonia	Mesonia oceanica
2	root	cellular organisms	Bacteria	Proteobacteria	Alphaproteobacteria	Sphingomonadales	Sphingomonadaceae	Sphingomonas	Sphingomonas bacterium
1	root	cellular organisms	Bacteria	Proteobacteria	Betaproteobacteria	Neisseriales	Chromobacteriaceae	Gulbenkiania	Gulbenkiania indica
4	root	cellular organisms	Bacteria	FCB group	Bacteroidetes/Chlorobi group	Bacteroidetes	Cytophagia	Cytophagales	Hymenobacteraceae	Hymenobacter	unclassified Hymenobacter	Hymenobacter sp.
1	root	cellular organisms	Bacteria	Terrabacteria group	Firmicutes	Clostridia	Eubacteriales	Peptococcaceae	Dehalobacter	unclassified Dehalobacter
1	root	cellular organisms	Bacteria	Proteobacteria	Hydrogenophilalia	Hydrogenophilales	Hydrogenophilaceae	Tepidiphilus	Tepidiphilus olei
2	root	cellular organisms	Bacteria	Proteobacteria	Betaproteobacteria	Burkholderiales	Comamonadaceae	Limnohabitans	unclassified Limnohabitans	Limnohabitans sp.
1	root	cellular organisms	Bacteria	Proteobacteria	Gammaproteobacteria	Cellvibrionales	Microbulbiferaceae	Microbulbifer	unclassified Microbulbifer	Microbulbifer sp. L3
1	root	cellular organisms	Bacteria	FCB group	Bacteroidetes/Chlorobi group	Bacteroidetes	unclassified Bacteroidetes	Bacteroidetes bacterium GWA2_40_15
1	root	cellular organisms	Bacteria	Proteobacteria	Betaproteobacteria	Neisseriales	Neisseriaceae	Neisseria	unclassified Neisseria	Neisseria sp. HMSC077D05
1	root	cellular organisms	Bacteria	Bacteria incertae sedis	Bacteria candidate phyla	Candidatus Raymondbacteria
2	root	cellular organisms	Eukaryota	Opisthokonta	Fungi	Dikarya	Ascomycota	saccharomyceta	Pezizomycotina	leotiomyceta
2	root	cellular organisms	Bacteria	Proteobacteria	Gammaproteobacteria	Chromatiales	Ectothiorhodospiraceae	Nitrococcus	Nitrococcus mobilis
1	root	cellular organisms	Bacteria	Terrabacteria group	Firmicutes	Clostridia	Eubacteriales	unclassified Eubacteriales	Clostridiales bacterium COT073_COT-073
1	root	cellular organisms	Eukaryota	Opisthokonta	Fungi	Dikarya	Basidiomycota	Agaricomycotina	Agaricomycetes	Agaricomycetidae	Agaricales	Lyophyllaceae	Tephrocybe	unclassified Tephrocybe	Tephrocybe sp. NHM501043
1	root	cellular organisms	Bacteria	Proteobacteria	Betaproteobacteria	Burkholderiales	Burkholderiaceae	Caballeronia	Caballeronia glebae
1	root	cellular organisms	Bacteria	Terrabacteria group	Firmicutes	Clostridia	Eubacteriales	Oscillospiraceae	Anaerofilum	unclassified Anaerofilum	Anaerofilum sp. An201
1	root	cellular organisms	Bacteria	Proteobacteria	Alphaproteobacteria	Rickettsiales	Rickettsiaceae	Rickettsieae	Rickettsia	unclassified Rickettsia	Rickettsia endosymbiont of Cardiosporidium cionae
1	root	Viruses	Duplodnaviria	Heunggongvirae	Uroviricota	Caudoviricetes	Caudovirales	Podoviridae	unclassified Podoviridae	Rhizobium phage RHph_N65
1	root	cellular organisms	Bacteria	Terrabacteria group	Firmicutes	Bacilli	Bacillales	Thermoactinomycetaceae
1	root	cellular organisms	Bacteria	Terrabacteria group	Cyanobacteria/Melainabacteria group	Cyanobacteria	Synechococcales	Chamaesiphonaceae	Chamaesiphon	Chamaesiphon minutus
1	root	cellular organisms	Bacteria	Spirochaetes	Spirochaetia	Spirochaetales	Treponemataceae	Treponema	Treponema rectale
1	root	cellular organisms	Bacteria	Proteobacteria	Gammaproteobacteria	Salinisphaerales	Salinisphaeraceae	Abyssibacter	Abyssibacter profundi
1	root	cellular organisms	Eukaryota	Opisthokonta	Fungi	Dikarya	Ascomycota	saccharomyceta	Saccharomycotina	Saccharomycetes	Saccharomycetales	Saccharomycetaceae	Kluyveromyces	Kluyveromyces marxianus
1	root	cellular organisms	Bacteria	Proteobacteria	Alphaproteobacteria	Rhodospirillales	Rhodospirillaceae	Magnetospirillum	Magnetospirillum magneticum
1	root	cellular organisms	Bacteria	Deferribacteres	Deferribacteres	Deferribacterales	Deferribacteraceae	Deferribacter	Deferribacter desulfuricans
2	root	cellular organisms	Bacteria	Proteobacteria	Alphaproteobacteria	Rhodobacterales	Rhodobacteraceae	Tabrizicola	unclassified Tabrizicola	Tabrizicola sp. J26
1	root	cellular organisms	Bacteria	Proteobacteria	Alphaproteobacteria	Sphingomonadales	Sphingosinicellaceae	Sphingosinicella	Sphingosinicella ginsenosidimutans
1	root	cellular organisms	Bacteria	Proteobacteria	Gammaproteobacteria	Pseudomonadales	Pseudomonadaceae	Pseudomonas	unclassified Pseudomonas	Pseudomonas sp. EpS/L25
1	root	cellular organisms	Bacteria	Proteobacteria	Betaproteobacteria	Burkholderiales	Comamonadaceae	Ramlibacter
1	root	cellular organisms	Eukaryota	Opisthokonta	Fungi	Fungi incertae sedis	Chytridiomycota	Chytridiomycota incertae sedis	Chytridiomycetes	Chytridiales	Chytriomycetaceae	Rhizoclosmatium	Rhizoclosmatium globosum
1	root	cellular organisms	Bacteria	Proteobacteria	Alphaproteobacteria	Hyphomicrobiales	Devosiaceae	Pelagibacterium	unclassified Pelagibacterium	Pelagibacterium sp. SCN 63-17
1	root	cellular organisms	Bacteria	Terrabacteria group	Firmicutes	Clostridia	Eubacteriales	Lachnospiraceae	Anaerotignum	unclassified Anaerotignum	Anaerotignum sp. MSJ-24
1	root	cellular organisms	Bacteria	Proteobacteria	Alphaproteobacteria	Rhodospirillales	Azospirillaceae	Skermanella	Skermanella stibiiresistens
1	root	cellular organisms	Bacteria	Terrabacteria group	Cyanobacteria/Melainabacteria group	Cyanobacteria	Synechococcales	Prochlorococcaceae	Cyanobium	unclassified Cyanobium	Cyanobium sp. NIES-981
3	root	cellular organisms	Bacteria	Proteobacteria	Alphaproteobacteria	Rhodobacterales	Roseobacteraceae	Ruegeria	Ruegeria pomeroyi
4	root	cellular organisms	Bacteria	Proteobacteria	Alphaproteobacteria	Rhodospirillales	unclassified Rhodospirillales
1	root	cellular organisms	Bacteria	Terrabacteria group	Firmicutes	Bacilli	Bacillales	Paenibacillaceae	Paenibacillus	Paenibacillus senegalensis
1	root	cellular organisms	Bacteria	Proteobacteria	Gammaproteobacteria	Enterobacterales	Enterobacteriaceae	Plesiomonas	Plesiomonas shigelloides
1	root	cellular organisms	Bacteria	Proteobacteria	Gammaproteobacteria	Cellvibrionales	Cellvibrionaceae	Marinimicrobium	Marinimicrobium alkaliphilum
1	root	cellular organisms	Bacteria	Proteobacteria	Gammaproteobacteria	Oceanospirillales	Hahellaceae	Hahella	Hahella chejuensis
2	root	cellular organisms	Bacteria	Bacteria incertae sedis	Bacteria candidate phyla	Candidatus Dependentiae	unclassified Candidatus Dependentiae	Candidatus Dependentiae bacterium ADurb.Bin331
3	root	cellular organisms	Bacteria	Proteobacteria	Betaproteobacteria	Burkholderiales	Comamonadaceae	Comamonas	Comamonas aquatica
2	root	cellular organisms	Bacteria	Proteobacteria	Betaproteobacteria	Rhodocyclales	Zoogloeaceae	Zoogloea	Zoogloea oleivorans
1	root	Viruses	Duplodnaviria	Heunggongvirae	Uroviricota	Caudoviricetes	Caudovirales	Myoviridae	unclassified Myoviridae	Prochlorococcus phage P-TIM68
2	root	cellular organisms	Bacteria	Terrabacteria group	Firmicutes	Clostridia	Eubacteriales	Lachnospiraceae	Anaerocolumna	Anaerocolumna aminovalerica
1	root	cellular organisms	Eukaryota	Opisthokonta	Fungi	Dikarya	Basidiomycota	Agaricomycotina	Tremellomycetes	Tremellales	Cryptococcaceae	Cryptococcus	Cryptococcus depauperatus
1	root	cellular organisms	Bacteria	Proteobacteria	Alphaproteobacteria	Sphingomonadales	Sphingomonadaceae	Novosphingobium	unclassified Novosphingobium	Novosphingobium sp. SCN 66-18
1	root	cellular organisms	Bacteria	Terrabacteria group	Firmicutes	Clostridia	Eubacteriales	Peptococcaceae	Desulfitibacter	unclassified Desulfitibacter	Desulfitibacter sp. BRH_c19
1	root	cellular organisms	Bacteria	Synergistetes	Synergistia	Synergistales	unclassified Synergistales
1	root	Viruses	unclassified viruses	Pacmanvirus S19
2	root	cellular organisms	Bacteria	FCB group	Bacteroidetes/Chlorobi group	Bacteroidetes	unclassified Bacteroidetes	Bacteroidetes bacterium ADurb.BinA174
1	root	cellular organisms	Bacteria	Terrabacteria group	Firmicutes	Clostridia	Eubacteriales	Lachnospiraceae	Niameybacter	Niameybacter massiliensis
1	root	cellular organisms	Bacteria	Proteobacteria	Gammaproteobacteria	Cellvibrionales	Halieaceae	Chromatocurvus	Chromatocurvus halotolerans
1	root	cellular organisms	Bacteria	PVC group	Lentisphaerae	Lentisphaeria	Lentisphaerales	Lentisphaeraceae	Lentisphaera	Lentisphaera araneosa
3	root	cellular organisms	Bacteria	Proteobacteria	Gammaproteobacteria	Alteromonadales	Shewanellaceae	Shewanella
1	root	cellular organisms	Bacteria	Proteobacteria	Gammaproteobacteria	Oceanospirillales	Halomonadaceae
1	root	cellular organisms	Bacteria	Proteobacteria	Alphaproteobacteria	Hyphomicrobiales	Rhizobiaceae	Rhizobium/Agrobacterium group	Rhizobium	Rhizobium arenae
1	root	cellular organisms	Bacteria	Proteobacteria	Alphaproteobacteria	Sphingomonadales	Erythrobacteraceae	Erythrobacter/Porphyrobacter group	Porphyrobacter	unclassified Porphyrobacter	Porphyrobacter sp. CACIAM 03H1
1	root	Viruses	Duplodnaviria	Heunggongvirae	Peploviricota	Herviviricetes	Herpesvirales	Herpesviridae	Alphaherpesvirinae	Simplexvirus	Saimiriine alphaherpesvirus 1
1	root	cellular organisms	Bacteria	Terrabacteria group	Actinobacteria	Thermoleophilia	Miltoncostaeales	Miltoncostaeaceae	Miltoncostaea	Miltoncostaea marina
1	root	cellular organisms	Bacteria	FCB group	Bacteroidetes/Chlorobi group	Bacteroidetes	unclassified Bacteroidetes	Bacteroidetes bacterium HGW-Bacteroidetes-12
1	root	cellular organisms	Bacteria	FCB group	Bacteroidetes/Chlorobi group	Bacteroidetes	Bacteroidia	Bacteroidales	Odoribacteraceae	Odoribacter	unclassified Odoribacter	Odoribacter sp. Z80
1	root	cellular organisms	Archaea	Candidatus Thermoplasmatota	Thermoplasmata	Thermoplasmatales	unclassified Thermoplasmatales	Thermoplasmatales archaeon SCGC AB-539-N05
1	root	cellular organisms	Bacteria	Proteobacteria	Gammaproteobacteria	Enterobacterales	Yersiniaceae	Rahnella	Rahnella victoriana
1	root	cellular organisms	Bacteria	Proteobacteria	Gammaproteobacteria	Oceanospirillales	Oceanospirillaceae	Marinomonas	unclassified Marinomonas	Marinomonas sp. A3A
4	root	cellular organisms	Bacteria	Terrabacteria group	Actinobacteria	Actinomycetia	Streptomycetales	Streptomycetaceae	Streptomyces	Streptomyces griseocarneus
1	root	cellular organisms	Bacteria	Terrabacteria group	Tenericutes	unclassified Tenericutes	Tenericutes bacterium GWF2_38_8
1	root	cellular organisms	Bacteria	Proteobacteria	Alphaproteobacteria	Hyphomonadales	Hyphomonadaceae	Hyphomonas
1	root	cellular organisms	Bacteria	FCB group	Bacteroidetes/Chlorobi group	Bacteroidetes	Bacteroidia	Bacteroidales	Bacteroidaceae	Bacteroides	Bacteroides coprosuis
1	root	cellular organisms	Eukaryota	Sar	Alveolata	Perkinsozoa	Perkinsea	Perkinsida	Perkinsidae	Perkinsus
1	root	cellular organisms	Bacteria	Proteobacteria	Betaproteobacteria	Rhodocyclales	Zoogloeaceae	Uliginosibacterium
1	root	cellular organisms	Eukaryota	Opisthokonta	Fungi	Dikarya	Basidiomycota	Agaricomycotina	Agaricomycetes	Agaricomycetidae	Boletales	Coniophorineae	Hygrophoropsidaceae	Hygrophoropsis	Hygrophoropsis aurantiaca
2	root	cellular organisms	Bacteria	Terrabacteria group	Firmicutes	unclassified Firmicutes sensu stricto	Firmicutes bacterium HGW-Firmicutes-16
1	root	cellular organisms	Bacteria	Proteobacteria	Betaproteobacteria	Burkholderiales	Burkholderiaceae	Paraburkholderia	unclassified Paraburkholderia	Paraburkholderia sp. UCT2
1	root	cellular organisms	Archaea	TACK group	Thaumarchaeota	environmental samples	uncultured marine thaumarchaeote KM3_87_H02
1	root	cellular organisms	Bacteria	Spirochaetes	Spirochaetia	Spirochaetales	Treponemataceae	Treponema	Treponema zuelzerae
1	root	cellular organisms	Bacteria	Proteobacteria	Alphaproteobacteria	Hyphomicrobiales	Chelatococcaceae	Camelimonas
1	root	cellular organisms	Eukaryota	Viridiplantae	Chlorophyta	Mamiellophyceae	Mamiellales	Mamiellaceae	Micromonas	Micromonas commoda
1	root	cellular organisms	Bacteria	FCB group	Bacteroidetes/Chlorobi group	Bacteroidetes	Sphingobacteriia	Sphingobacteriales	Sphingobacteriaceae	Pedobacter	unclassified Pedobacter	Pedobacter sp. G11
1	root	cellular organisms	Bacteria	Terrabacteria group	Firmicutes	Negativicutes	Veillonellales	Veillonellaceae	Veillonella
1	root	cellular organisms	Bacteria	Terrabacteria group	Firmicutes	Clostridia	Eubacteriales	Lachnospiraceae	Anaerostipes
1	root	cellular organisms	Bacteria	Proteobacteria	Alphaproteobacteria	Hyphomicrobiales	Xanthobacteraceae	Xanthobacter	unclassified Xanthobacter	Xanthobacter sp. 126
4	root	cellular organisms	Bacteria	FCB group	Bacteroidetes/Chlorobi group	Bacteroidetes	Bacteroidia	Bacteroidales	Bacteroidaceae	Bacteroides	unclassified Bacteroides	Bacteroides sp. 224
1	root	cellular organisms	Bacteria	Terrabacteria group	Actinobacteria	Actinomycetia	Micrococcales	Promicromonosporaceae	Krasilnikoviella	Krasilnikoviella flava
1	root	cellular organisms	Bacteria	Terrabacteria group	Firmicutes	Clostridia	Eubacteriales	Lachnospiraceae	Mediterraneibacter	[Ruminococcus] torques
1	root	cellular organisms	Bacteria	Proteobacteria	delta/epsilon subdivisions	Deltaproteobacteria	Myxococcales	unclassified Myxococcales	Myxococcales bacterium FL481
2	root	cellular organisms	Bacteria	Atribacterota	unclassified Atribacterota	Candidatus Atribacteria bacterium 1244-E10-H5-B2
2	root	cellular organisms	Bacteria	FCB group	Bacteroidetes/Chlorobi group	Bacteroidetes	unclassified Bacteroidetes	Bacteroidetes bacterium CG2_30_32_10
3	root	cellular organisms	Bacteria	Proteobacteria	Betaproteobacteria	Burkholderiales	Burkholderiaceae	Cupriavidus	Cupriavidus basilensis
3	root	cellular organisms	Bacteria	Proteobacteria	Gammaproteobacteria	Xanthomonadales	Xanthomonadaceae	Silanimonas	Silanimonas lenta
1	root	cellular organisms	Bacteria	Terrabacteria group	Firmicutes	Clostridia	Eubacteriales	Clostridiaceae	Clostridium	unclassified Clostridium	Clostridium sp. Marseille-P3244
1	root	cellular organisms	Bacteria	Terrabacteria group	Chloroflexi	Chloroflexia	Chloroflexales	Roseiflexineae	Roseiflexaceae	Roseiflexus
2	root	cellular organisms	Bacteria	Proteobacteria	Betaproteobacteria	Burkholderiales	Comamonadaceae	Rhodoferax	unclassified Rhodoferax	Rhodoferax sp. PAMC 29310
1	root	cellular organisms	Bacteria	Terrabacteria group	Actinobacteria	Actinomycetia	Streptomycetales	Streptomycetaceae	Streptomyces	unclassified Streptomyces	Streptomyces sp. C
1	root	cellular organisms	Bacteria	Terrabacteria group	Firmicutes	Bacilli	Lactobacillales	Streptococcaceae	Streptococcus	Streptococcus agalactiae
1	root	cellular organisms	Bacteria	Terrabacteria group	Actinobacteria	Actinomycetia	Micrococcales	Microbacteriaceae	Leucobacter	Leucobacter luti
1	root	cellular organisms	Bacteria	Proteobacteria	Gammaproteobacteria	Chromatiales	unclassified Chromatiales	Chromatiales bacterium USCg_Taylor
1	root	cellular organisms	Bacteria	Terrabacteria group	Firmicutes	Clostridia	Eubacteriales	Oscillospiraceae	Anaerotruncus	Anaerotruncus rubiinfantis
2	root	cellular organisms	Bacteria	Proteobacteria	delta/epsilon subdivisions	Deltaproteobacteria	unclassified Deltaproteobacteria	Deltaproteobacteria bacterium HGW-Deltaproteobacteria-10
1	root	cellular organisms	Bacteria	Proteobacteria	Alphaproteobacteria	Hyphomicrobiales	Hyphomicrobiaceae	Methyloligella	unclassified Methyloligella	Methyloligella sp.
1	root	cellular organisms	Bacteria	Proteobacteria	Alphaproteobacteria	Rhodobacterales	Roseobacteraceae	Salipiger	Salipiger profundus
2	root	cellular organisms	Bacteria	Proteobacteria	delta/epsilon subdivisions	Epsilonproteobacteria	Campylobacterales	Thiovulaceae	Sulfuricurvum	unclassified Sulfuricurvum	Sulfuricurvum sp. MLSB
1	root	cellular organisms	Bacteria	Terrabacteria group	Tenericutes	Mollicutes	Mycoplasmatales	Mycoplasmataceae	Mycoplasma	Mycoplasma haemocanis
1	root	cellular organisms	Bacteria	environmental samples	uncultured bacterium 5E7
3	root	Viruses	Duplodnaviria	Heunggongvirae	Uroviricota	Caudoviricetes	Caudovirales	Myoviridae	unclassified Myoviridae	Myoviridae sp. ctPuP5
3	root	cellular organisms	Bacteria	Proteobacteria	Alphaproteobacteria	Hyphomicrobiales	Bradyrhizobiaceae	Bradyrhizobium	Bradyrhizobium erythrophlei
1	root	cellular organisms	Bacteria	Terrabacteria group	Tenericutes	Mycoplasmoidales	Metamycoplasmataceae	Metamycoplasma	Metamycoplasma subdolum
2	root	cellular organisms	Bacteria	Bacteria incertae sedis	Candidatus Moduliflexus	Candidatus Moduliflexus flocculans
1	root	cellular organisms	Bacteria	Proteobacteria	Alphaproteobacteria	Hyphomicrobiales	Phyllobacteriaceae	Mesorhizobium	Mesorhizobium soli
1	root	cellular organisms	Bacteria	Terrabacteria group	Firmicutes	Clostridia	Eubacteriales	Clostridiaceae	Clostridium	Clostridium tunisiense
3	root	cellular organisms	Bacteria	Proteobacteria	Betaproteobacteria	Burkholderiales	Comamonadaceae	Zhizhongheella	Zhizhongheella caldifontis
1	root	cellular organisms	Bacteria	Proteobacteria	Alphaproteobacteria	Rhodobacterales	Rhodobacteraceae	Pseudogemmobacter	Pseudogemmobacter bohemicus
1	root	cellular organisms	Bacteria	Proteobacteria	Alphaproteobacteria	Hyphomicrobiales	Xanthobacteraceae	Starkeya	Starkeya novella
2	root	cellular organisms	Bacteria	Terrabacteria group	Firmicutes	Clostridia	Eubacteriales	Lachnospiraceae	unclassified Lachnospiraceae
1	root	cellular organisms	Bacteria	Terrabacteria group	Firmicutes	unclassified Firmicutes sensu stricto	Firmicutes bacterium HGW-Firmicutes-15
1	root	cellular organisms	Bacteria	Terrabacteria group	Firmicutes	Clostridia	Eubacteriales	Lachnospiraceae	Roseburia	Roseburia hominis
2	root	cellular organisms	Bacteria	Terrabacteria group	Firmicutes	Erysipelotrichia	Erysipelotrichales	Erysipelotrichaceae	Erysipelothrix	unclassified Erysipelothrix
4	root	cellular organisms	Bacteria	Terrabacteria group	Chloroflexi	unclassified Chloroflexi	Chloroflexi bacterium OLB15
1	root	cellular organisms	Bacteria	Proteobacteria	Alphaproteobacteria	Rhodobacterales	Rhodobacteraceae	Paracoccus	Paracoccus xiamenensis
2	root	cellular organisms	Bacteria	Proteobacteria	delta/epsilon subdivisions	Deltaproteobacteria	Desulfovibrionales	Desulfonatronaceae	Desulfonatronum	Desulfonatronum thiodismutans
2	root	cellular organisms	Bacteria	Proteobacteria	Alphaproteobacteria	Hyphomicrobiales	Rhizobiaceae	Sinorhizobium/Ensifer group	Sinorhizobium	Sinorhizobium fredii group	Sinorhizobium fredii
2	root	cellular organisms	Bacteria	Proteobacteria	Gammaproteobacteria	Xanthomonadales	Xanthomonadaceae	unclassified Xanthomonadaceae
1	root	cellular organisms	Bacteria	unclassified Bacteria	bacterium A37T11
[truncated: 7,166 more rows]
[truncated: 2 more columns]

## Sheet: Fig 1B
			Taxonomic classification of SR1 for krona plot
1	root	cellular organisms	Bacteria	Proteobacteria	Gammaproteobacteria	Chromatiales	Chromatiaceae	Marichromatium	unclassified Marichromatium	Marichromatium sp. AB32
1	root	cellular organisms	Bacteria	Proteobacteria	Gammaproteobacteria	Chromatiales	Ectothiorhodospiraceae	unclassified Ectothiorhodospiraceae	Ectothiorhodospiraceae bacterium BW-2
1	root	cellular organisms	Bacteria	Proteobacteria	Gammaproteobacteria	Pseudomonadales	Pseudomonadaceae	Pseudomonas	unclassified Pseudomonas	Pseudomonas sp. PDM32
1	root	cellular organisms	Bacteria	Fusobacteria	Fusobacteriia	Fusobacteriales	Fusobacteriaceae	Psychrilyobacter	Psychrilyobacter atlanticus
1	root	cellular organisms	Bacteria	Terrabacteria group	Firmicutes	Bacilli	Bacillales	Bacillaceae	Caldalkalibacillus	Caldalkalibacillus thermarum
1	root	cellular organisms	Bacteria	Proteobacteria	Betaproteobacteria	Rhodocyclales	Azonexaceae	Dechloromonas	Dechloromonas agitata
1	root	cellular organisms	Bacteria	PVC group
1	root	cellular organisms	Bacteria	Proteobacteria	Gammaproteobacteria	Aeromonadales	Aeromonadaceae	Aeromonas	unclassified Aeromonas	Aeromonas sp. FDAARGOS 1402
1	root	cellular organisms	Bacteria	Terrabacteria group	Firmicutes	Bacilli	Bacillales	Paenibacillaceae	Paenibacillus	unclassified Paenibacillus	Paenibacillus sp. S02
1	root	cellular organisms	Bacteria	FCB group	Bacteroidetes/Chlorobi group	Bacteroidetes	Cytophagia	Cytophagales	Cyclobacteriaceae	Cyclobacterium	Cyclobacterium jeungdonense
1	root	cellular organisms	Bacteria	Proteobacteria	Oligoflexia	Bdellovibrionales	unclassified Bdellovibrionales
1	root	cellular organisms	Bacteria	Proteobacteria	Alphaproteobacteria	Rhodobacterales	Rhodobacteraceae	Thioclava	Thioclava sediminum
1	root	cellular organisms	Bacteria	Terrabacteria group	Actinobacteria	Actinomycetia	Streptomycetales	Streptomycetaceae	Streptomyces	unclassified Streptomyces	Streptomyces sp. AcH 505
1	root	Viruses	Varidnaviria	Bamfordvirae	Nucleocytoviricota	Megaviricetes	Imitervirales	Mimiviridae	Cafeteriavirus	Cafeteria roenbergensis virus	Cafeteria roenbergensis virus BV-PW1
1	root	cellular organisms	Bacteria	Proteobacteria	delta/epsilon subdivisions	Epsilonproteobacteria	Campylobacterales	Arcobacteraceae	Arcobacter	unclassified Arcobacter	Arcobacter sp.
1	root	cellular organisms	Bacteria	Terrabacteria group	Firmicutes	Clostridia	Eubacteriales	Peptococcaceae	Desulfofundulus
1	root	cellular organisms	Bacteria	FCB group	Bacteroidetes/Chlorobi group	Bacteroidetes	Flavobacteriia	Flavobacteriales	Flavobacteriaceae	Mariniflexile	unclassified Mariniflexile	Mariniflexile sp. TRM1-10
1	root	cellular organisms	Bacteria	Proteobacteria	Betaproteobacteria	Burkholderiales	Comamonadaceae	Simplicispira	Simplicispira lacusdiani
1	root	cellular organisms	Eukaryota	Opisthokonta	Fungi	Dikarya	Basidiomycota	Agaricomycotina	Agaricomycetes	Agaricomycetidae	Boletales	Boletales incertae sedis	Leucogyrophana	Leucogyrophana mollusca
1	root	cellular organisms	Bacteria	Terrabacteria group	Firmicutes	Bacilli	Bacillales	Bacillaceae	Pontibacillus	Pontibacillus halophilus
1	root	cellular organisms	Eukaryota	Opisthokonta	Fungi	Dikarya	Ascomycota	saccharomyceta	Pezizomycotina	Pezizomycetes	Pezizales	Pyronemataceae	Sphaerosporella	Sphaerosporella brunnea
1	root	cellular organisms	Bacteria	Terrabacteria group	Firmicutes	Negativicutes	Veillonellales	Veillonellaceae	Lucifera	Lucifera butyrica
1	root	cellular organisms	Bacteria	Proteobacteria	Gammaproteobacteria	Alteromonadales	Pseudoalteromonadaceae	Algicola	Algicola sagamiensis
1	root	cellular organisms	Bacteria	Proteobacteria	Gammaproteobacteria	Moraxellales	Moraxellaceae	Acinetobacter	unclassified Acinetobacter	Acinetobacter sp. 10FS3-1
1	root	cellular organisms	Bacteria	Proteobacteria	Betaproteobacteria	Burkholderiales	Burkholderiales genera incertae sedis	Methylibium	unclassified Methylibium	Methylibium sp. NZG
1	root	cellular organisms	Bacteria	Proteobacteria	Alphaproteobacteria	Hyphomicrobiales	Methylobacteriaceae	Methylobacterium
1	root	cellular organisms	Bacteria	Proteobacteria	delta/epsilon subdivisions	Deltaproteobacteria	Desulfuromonadales	unclassified Desulfuromonadales	Desulfuromonadales bacterium
1	root	cellular organisms	Eukaryota	Opisthokonta	Fungi	Dikarya	Ascomycota	saccharomyceta	Pezizomycotina	leotiomyceta	Eurotiomycetes	Chaetothyriomycetidae	Chaetothyriales	Herpotrichiellaceae	Cladophialophora	Cladophialophora immunda
1	root	cellular organisms	Bacteria	Terrabacteria group	Firmicutes	Bacilli	Bacillales	Bacillaceae	Bacillus	unclassified Bacillus (in: Bacteria)	Bacillus sp. AFS037270
1	root	cellular organisms	Bacteria	Terrabacteria group	Actinobacteria	Actinomycetia	Geodermatophilales	Geodermatophilaceae	Blastococcus	Blastococcus aggregatus
1	root	cellular organisms	Archaea	Euryarchaeota	Stenosarchaea group	Halobacteria	Halobacteriales	unclassified Halobacteriales
1	root	cellular organisms	Bacteria	Proteobacteria	Alphaproteobacteria	Rhodobacterales	Rhodobacteraceae	Gemmobacter	Gemmobacter lanyuensis
1	root	cellular organisms	Bacteria	Proteobacteria	Gammaproteobacteria	Pseudomonadales	Pseudomonadaceae	Pseudomonas	Pseudomonas versuta
1	root	cellular organisms	Bacteria	FCB group	Bacteroidetes/Chlorobi group	Bacteroidetes	Bacteroidia	Bacteroidales	Bacteroidaceae	Bacteroides	unclassified Bacteroides	Bacteroides sp. SM23_62
1	root	cellular organisms	Bacteria	Proteobacteria	Alphaproteobacteria	Rhodobacterales	Rhodobacteraceae	Pseudogemmobacter	unclassified Pseudogemmobacter	Pseudogemmobacter sp. CC-YST710
1	root	cellular organisms	Bacteria	Terrabacteria group	Cyanobacteria/Melainabacteria group	Cyanobacteria	Oscillatoriophycideae
1	root	cellular organisms	Eukaryota	Sar	Alveolata	Ciliophora	Intramacronucleata	Armophorea	Metopida	Metopidae	Nyctotherus	Nyctotherus ovalis
1	root	cellular organisms	Bacteria	FCB group	Bacteroidetes/Chlorobi group	Bacteroidetes	Bacteroidia	Marinilabiliales	Prolixibacteraceae	Mariniphaga	Mariniphaga sediminis
1	root	cellular organisms	Bacteria	Proteobacteria	Alphaproteobacteria	Rhodospirillales	Acetobacteraceae	Gluconobacter
1	root	cellular organisms	Bacteria	Proteobacteria	Gammaproteobacteria	Pseudomonadales	Pseudomonadaceae	Pseudomonas	Pseudomonas aeruginosa group	Pseudomonas mendocina
1	root	cellular organisms	Bacteria	Proteobacteria	Alphaproteobacteria	Kordiimonadales	Kordiimonadaceae	Eilatimonas	Eilatimonas milleporae
1	root	cellular organisms	Bacteria	Terrabacteria group	Actinobacteria	Actinomycetia	Propionibacteriales	Propionibacteriaceae	Tessaracoccus	unclassified Tessaracoccus	Tessaracoccus sp. OH4464_COT-324
1	root	cellular organisms	Bacteria	FCB group	Bacteroidetes/Chlorobi group	Bacteroidetes	Flavobacteriia	Flavobacteriales	Weeksellaceae	Empedobacter	Empedobacter falsenii
1	root	cellular organisms	Bacteria	Terrabacteria group	Firmicutes	environmental samples	Firmicutes bacterium CAG:238
1	root	cellular organisms	Bacteria	Terrabacteria group	Actinobacteria	Actinomycetia	Streptomycetales	Streptomycetaceae	Streptomyces	Streptomyces pseudogriseolus group	Streptomyces gancidicus
1	root	Viruses	Duplodnaviria	Heunggongvirae	Uroviricota	Caudoviricetes	Caudovirales	Ackermannviridae	unclassified Ackermannviridae	Ralstonia phage RSP15
1	root	cellular organisms	Bacteria	Proteobacteria	Gammaproteobacteria	Pseudomonadales	Pseudomonadaceae	Pseudomonas	Pseudomonas fluorescens group	Pseudomonas costantinii
1	root	cellular organisms	Eukaryota	Opisthokonta	Fungi	Dikarya	Ascomycota	saccharomyceta	Pezizomycotina	leotiomyceta	sordariomyceta	Leotiomycetes	Helotiales	Hyaloscyphaceae	Hyaloscypha
1	root	cellular organisms	Bacteria	Proteobacteria	Alphaproteobacteria	Rhodobacterales	Rhodobacteraceae	Frigidibacter	Frigidibacter albus
1	root	cellular organisms	Bacteria	Proteobacteria	Betaproteobacteria	Burkholderiales	Oxalobacteraceae	Janthinobacterium	unclassified Janthinobacterium
1	root	cellular organisms	Bacteria	Terrabacteria group	Actinobacteria	Rubrobacteria	Rubrobacterales	Rubrobacteraceae	Rubrobacter	Rubrobacter indicoceani
1	root	cellular organisms	Eukaryota	Opisthokonta	Fungi	Dikarya	Ascomycota	saccharomyceta	Saccharomycotina	Saccharomycetes	Saccharomycetales	CUG-Ser1 clade	Debaryomycetaceae	Candida/Lodderomyces clade	Lodderomyces	Lodderomyces elongisporus	Lodderomyces elongisporus NRRL YB-4239
1	root	cellular organisms	Bacteria	Terrabacteria group	Deinococcus-Thermus	Deinococci	Deinococcales	Deinococcaceae	Deinococcus	unclassified Deinococcus	Deinococcus sp. KNUC1210
1	root	cellular organisms	Bacteria	FCB group	Gemmatimonadetes	unclassified Gemmatimonadetes	Gemmatimonadetes bacterium GWC2_71_9
1	root	cellular organisms	Bacteria	Proteobacteria	Gammaproteobacteria	Pseudomonadales	Pseudomonadaceae	Pseudomonas	unclassified Pseudomonas	Pseudomonas sp. B28(2017)
1	root	cellular organisms	Bacteria	Proteobacteria	Gammaproteobacteria	Chromatiales	Ectothiorhodospiraceae	Thioalkalivibrio	Thioalkalivibrio halophilus
1	root	cellular organisms	Bacteria	FCB group	Bacteroidetes/Chlorobi group	Bacteroidetes	Flavobacteriia	Flavobacteriales	Flavobacteriaceae	Aequorivita	Aequorivita echinoideorum
1	root	cellular organisms	Bacteria	PVC group	Verrucomicrobia	Opitutae	Puniceicoccales	Puniceicoccaceae
1	root	cellular organisms	Bacteria	Proteobacteria	Betaproteobacteria	Burkholderiales	Comamonadaceae	Limnohabitans	Limnohabitans radicicola
1	root	cellular organisms	Bacteria	Proteobacteria	Gammaproteobacteria	Pseudomonadales	Pseudomonadaceae	Pseudomonas	Pseudomonas stutzeri group	Pseudomonas stutzeri subgroup	Pseudomonas stutzeri
1	root	cellular organisms	Bacteria	Proteobacteria	Betaproteobacteria	Burkholderiales	Comamonadaceae	Limnohabitans	unclassified Limnohabitans	Limnohabitans sp. 2KL-17
1	root	cellular organisms	Bacteria	PVC group	Verrucomicrobia	Opitutae	Opitutales	Opitutaceae	unclassified Opitutaceae	Opitutaceae bacterium TAV1
1	root	cellular organisms	Eukaryota	Opisthokonta	Fungi	Dikarya	Ascomycota	saccharomyceta	Saccharomycotina	Saccharomycetes	Saccharomycetales	Saccharomycodaceae	Hanseniaspora	Hanseniaspora valbyensis	Hanseniaspora valbyensis NRRL Y-1626
1	root	cellular organisms	Bacteria	FCB group	Bacteroidetes/Chlorobi group	Bacteroidetes	Flavobacteriia	Flavobacteriales	Flavobacteriaceae	Imtechella	Imtechella halotolerans
1	root	cellular organisms	Bacteria	Proteobacteria	Betaproteobacteria	Ferrovales	Ferrovaceae	Ferrovum	unclassified Ferrovum
1	root	cellular organisms	Bacteria	FCB group	Bacteroidetes/Chlorobi group	Bacteroidetes	Bacteroidia	Bacteroidales	Bacteroidaceae	Bacteroides	Bacteroides graminisolvens	Bacteroides graminisolvens DSM 19988 = JCM 15093
1	root	cellular organisms	Bacteria	FCB group	Bacteroidetes/Chlorobi group	Bacteroidetes	Sphingobacteriia	Sphingobacteriales	Sphingobacteriaceae	Parapedobacter	Parapedobacter koreensis
1	root	cellular organisms	Bacteria	Terrabacteria group	Firmicutes	Bacilli	Bacillales	Bacillaceae	Bacillus	Bacillus mediterraneensis
1	root	cellular organisms	Bacteria	FCB group	Bacteroidetes/Chlorobi group	Bacteroidetes	Flavobacteriia	Flavobacteriales	Flavobacteriaceae	Flavobacterium	Flavobacterium nitrogenifigens
1	root	cellular organisms	Bacteria	Proteobacteria	Betaproteobacteria	Burkholderiales	Burkholderiaceae	Burkholderia
1	root	cellular organisms	Eukaryota	Opisthokonta	Fungi	Dikarya	Ascomycota	saccharomyceta	Pezizomycotina	leotiomyceta	Eurotiomycetes	Eurotiomycetidae	Eurotiales	Aspergillaceae	Penicillium	Penicillium brasilianum
1	root	cellular organisms	Bacteria	Proteobacteria	Gammaproteobacteria	Alteromonadales	Psychromonadaceae	Psychromonas	Psychromonas ingrahamii
1	root	cellular organisms	Bacteria	Proteobacteria	Betaproteobacteria	Burkholderiales	Burkholderiaceae	Polynucleobacter	unclassified Polynucleobacter	Polynucleobacter sp. AP-Kolm-20A-A1
1	root	cellular organisms	Bacteria	Proteobacteria	Alphaproteobacteria	Rhodobacterales	Roseobacteraceae	Thalassobius	unclassified Thalassobius	Thalassobius sp. Cn5-15
1	root	cellular organisms	Bacteria	PVC group	Planctomycetes	Phycisphaerae	unclassified Phycisphaerae	Phycisphaerae bacterium SM23_33
1	root	cellular organisms	Bacteria	Proteobacteria	Alphaproteobacteria	Rhodobacterales	Roseobacteraceae	Sulfitobacter	unclassified Sulfitobacter	Sulfitobacter sp. EhC04
1	root	Viruses	Duplodnaviria	Heunggongvirae	Uroviricota	Caudoviricetes	Caudovirales	Siphoviridae	unclassified Siphoviridae	Serratia phage Eta
1	root	cellular organisms	Bacteria	Terrabacteria group	Cyanobacteria/Melainabacteria group	Cyanobacteria	Synechococcales	Prochlorococcaceae	Cyanobium	unclassified Cyanobium	Cyanobium sp.
1	root	cellular organisms	Bacteria	FCB group	Bacteroidetes/Chlorobi group	Bacteroidetes	Flavobacteriia	Flavobacteriales	Flavobacteriaceae	Kordia	unclassified Kordia	Kordia sp. SMS9
1	root	cellular organisms	Eukaryota	Opisthokonta	Fungi	Dikarya	Ascomycota	saccharomyceta	Pezizomycotina	leotiomyceta	sordariomyceta	Leotiomycetes	Helotiales	Tricladiaceae	Halenospora	Halenospora varia
1	root	cellular organisms	Eukaryota	Opisthokonta	Fungi	Dikarya	Ascomycota	saccharomyceta	Pezizomycotina	Pezizomycetes	Pezizales
1	root	cellular organisms	Bacteria	Proteobacteria	Gammaproteobacteria	Alteromonadales	Alteromonadaceae	Glaciecola	Glaciecola nitratireducens
1	root	cellular organisms	Eukaryota	Opisthokonta	Fungi	Dikarya	Ascomycota	saccharomyceta	Pezizomycotina	leotiomyceta	sordariomyceta	Leotiomycetes	Leotiomycetes incertae sedis	Pseudeurotiaceae	Pseudogymnoascus	unclassified Pseudogymnoascus	Pseudogymnoascus sp. VKM F-4514 (FW-929)
1	root	cellular organisms	Bacteria	Terrabacteria group	Firmicutes	Bacilli	Bacillales	Planococcaceae	Jeotgalibacillus	unclassified Jeotgalibacillus	Jeotgalibacillus sp. S-D1
1	root	cellular organisms	Eukaryota	Opisthokonta	Fungi	Dikarya	Ascomycota	saccharomyceta	Pezizomycotina	leotiomyceta	sordariomyceta	Leotiomycetes	Leotiomycetes incertae sedis	Pseudeurotiaceae	Pseudogymnoascus	unclassified Pseudogymnoascus	Pseudogymnoascus sp. VKM F-4281 (FW-2241)
1	root	cellular organisms	Eukaryota	Opisthokonta	Fungi	Dikarya	Ascomycota	saccharomyceta	Pezizomycotina	leotiomyceta	dothideomyceta	Dothideomycetes	Pleosporomycetidae	Pleosporales	Pleosporineae	Didymellaceae	Epicoccum	Epicoccum nigrum
1	root	cellular organisms	Bacteria	Proteobacteria	Betaproteobacteria	Burkholderiales	Comamonadaceae	Macromonas	Macromonas bipunctata
1	root	cellular organisms	Eukaryota	Discoba	Euglenozoa	Kinetoplastea	Metakinetoplastina	Trypanosomatida	Trypanosomatidae	Leishmaniinae	Leishmania
1	root	Viruses	Varidnaviria	Bamfordvirae	Nucleocytoviricota	Pokkesviricetes	Chitovirales	Poxviridae	Chordopoxvirinae	unclassified Chordopoxvirinae	BeAn 58058 virus
1	root	cellular organisms	Eukaryota	Opisthokonta	Fungi	Dikarya	Basidiomycota	Agaricomycotina	Agaricomycetes	Agaricomycetidae	Agaricales	Tricholomataceae	Tricholoma	Tricholoma matsutake	Tricholoma matsutake 945
1	root	cellular organisms	Bacteria	FCB group	Bacteroidetes/Chlorobi group	Bacteroidetes	Flavobacteriia	Flavobacteriales	Flavobacteriaceae	Flavobacterium	Flavobacterium sangjuense
1	root	cellular organisms	Bacteria	Terrabacteria group	Firmicutes	Clostridia	Eubacteriales	Clostridiaceae	Clostridium	unclassified Clostridium
1	root	cellular organisms	Bacteria	Proteobacteria	delta/epsilon subdivisions	Deltaproteobacteria	Bradymonadales
1	root	cellular organisms	Bacteria	Proteobacteria	Gammaproteobacteria	Alteromonadales	Shewanellaceae	Shewanella	unclassified Shewanella	Shewanella sp. DNRA4
1	root	cellular organisms	Bacteria	Terrabacteria group	Chloroflexi	Thermoflexia	Thermoflexales	unclassified Thermoflexales	Thermoflexales bacterium
1	root	cellular organisms	Bacteria	FCB group	Bacteroidetes/Chlorobi group	Bacteroidetes	Cytophagia	Cytophagales	Cytophagaceae	Spirosoma	Spirosoma telluris
1	root	cellular organisms	Eukaryota	Opisthokonta	Fungi	Dikarya	Ascomycota	saccharomyceta	Saccharomycotina	Saccharomycetes	Saccharomycetales	CUG-Ser1 clade	Debaryomycetaceae	Scheffersomyces	Scheffersomyces stipitis	Scheffersomyces stipitis CBS 6054
1	root	cellular organisms	Eukaryota	Sar	Alveolata	Ciliophora	Intramacronucleata	Spirotrichea	Hypotrichia	Euplotida	Gastrocirrhidae	Gastrocirrhus
1	root	cellular organisms	Bacteria	PVC group	Chlamydiae	Chlamydiia	Parachlamydiales	Parachlamydiaceae	Neochlamydia	unclassified Neochlamydia	Neochlamydia sp. S13
1	root	cellular organisms	Bacteria	FCB group	Bacteroidetes/Chlorobi group	Bacteroidetes	Bacteroidetes incertae sedis	Candidatus Sulfidibacteriales	Candidatus Sulfidibacterium	Candidatus Sulfidibacterium hydrothermale
1	root	cellular organisms	Bacteria	Bacteria incertae sedis	Bacteria candidate phyla	Patescibacteria group	Microgenomates group	Candidatus Daviesbacteria	Candidatus Daviesbacteria bacterium
1	root	cellular organisms	Bacteria	Proteobacteria	Gammaproteobacteria	Moraxellales	Moraxellaceae	Acinetobacter	unclassified Acinetobacter	Acinetobacter sp. YH01008
1	root	cellular organisms	Bacteria	Terrabacteria group	Actinobacteria	Actinomycetia	Propionibacteriales	Nocardioidaceae	Nocardioides	Nocardioides dokdonensis
2	root	cellular organisms	Bacteria	Terrabacteria group	Firmicutes	Clostridia	Eubacteriales	environmental samples	uncultured Eubacteriales bacterium
1	root	cellular organisms	Bacteria	Proteobacteria	Betaproteobacteria	Rhodocyclales	Zoogloeaceae	Thauera	Thauera aromatica	Thauera aromatica K172
1	root	cellular organisms	Bacteria	Proteobacteria	Gammaproteobacteria	Chromatiales	Chromatiaceae	Arsukibacterium	unclassified Arsukibacterium	Arsukibacterium sp. MJ3
1	root	cellular organisms	Bacteria	FCB group	Bacteroidetes/Chlorobi group	Bacteroidetes	Bacteroidia	Bacteroidales	Prevotellaceae	Prevotella	environmental samples	Prevotella sp. CAG:1031
1	root	cellular organisms	Bacteria	Proteobacteria	Betaproteobacteria	Rhodocyclales	Zoogloeaceae	Thauera	Thauera humireducens
1	root	cellular organisms	Bacteria	FCB group	Bacteroidetes/Chlorobi group	Bacteroidetes	Bacteroidia	Bacteroidales	Prevotellaceae	Pseudoprevotella	Pseudoprevotella muciniphila
1	root	cellular organisms	Bacteria	Terrabacteria group	Actinobacteria	Actinomycetia	Micrococcales	Microbacteriaceae	Clavibacter	Clavibacter michiganensis	Clavibacter michiganensis subsp. michiganensis
1	root	cellular organisms	Bacteria	Proteobacteria	Betaproteobacteria	Neisseriales	Neisseriaceae	Rivicola	Rivicola pingtungensis
1	root	cellular organisms	Eukaryota	Opisthokonta	Fungi	Dikarya	Ascomycota	saccharomyceta	Saccharomycotina	Saccharomycetes	Saccharomycetales	CUG-Ser1 clade	Debaryomycetaceae	Candida/Lodderomyces clade	Candida
1	root	cellular organisms	Eukaryota	Sar	Alveolata	Ciliophora	Intramacronucleata	Oligohymenophorea	Hymenostomatida	Tetrahymenina
1	root	cellular organisms	Bacteria	Terrabacteria group	Actinobacteria	Actinomycetia	Streptomycetales	Streptomycetaceae	Streptomyces	Streptomyces albofaciens
1	root	cellular organisms	Bacteria	Terrabacteria group	Cyanobacteria/Melainabacteria group	Cyanobacteria	Nostocales	unclassified Nostocales	Nostocales cyanobacterium
1	root	cellular organisms	Bacteria	Proteobacteria	Alphaproteobacteria	Maricaulales	Robiginitomaculaceae	Robiginitomaculum	unclassified Robiginitomaculum	Robiginitomaculum sp.
1	root	cellular organisms	Bacteria	Proteobacteria	Gammaproteobacteria	Alteromonadales	Alteromonadaceae	Alginatibacterium	Alginatibacterium sediminis
1	root	cellular organisms	Bacteria	Terrabacteria group	Tenericutes	Mollicutes	Mycoplasmatales	Mycoplasmataceae	Mycoplasma
1	root	cellular organisms	Bacteria	Proteobacteria	Gammaproteobacteria	Pseudomonadales	Pseudomonadaceae	Pseudomonas	Pseudomonas syringae group	Pseudomonas syringae group genomosp. 1	Pseudomonas syringae	Pseudomonas syringae pv. syringae
1	root	cellular organisms	Bacteria	Proteobacteria	Alphaproteobacteria	Caulobacterales	Caulobacteraceae	Caulobacter	unclassified Caulobacter	Caulobacter sp. S45
1	root	cellular organisms	Bacteria	Proteobacteria	Gammaproteobacteria	Moraxellales	Moraxellaceae	Acinetobacter	Acinetobacter celticus
1	root	cellular organisms	Eukaryota	Opisthokonta	Fungi	Dikarya	Basidiomycota	Agaricomycotina	Agaricomycetes	Agaricomycetes incertae sedis	Polyporales	Phanerochaetaceae	Phanerochaete	Phanerochaete pseudomagnoliae
1	root	cellular organisms	Bacteria	Proteobacteria	Gammaproteobacteria	Enterobacterales	Enterobacteriaceae	Klebsiella/Raoultella group	Raoultella	Raoultella planticola
1	root	cellular organisms	Bacteria	Terrabacteria group	Tenericutes	Mollicutes	Entomoplasmatales	Spiroplasmataceae	Spiroplasma	Spiroplasma chrysopicola
1	root	cellular organisms	Bacteria	Proteobacteria	Gammaproteobacteria	Moraxellales	Moraxellaceae	Acinetobacter	unclassified Acinetobacter	Acinetobacter sp. FL51
1	root	cellular organisms	Bacteria	Proteobacteria	Alphaproteobacteria	Caulobacterales	Caulobacteraceae	Phenylobacterium	unclassified Phenylobacterium	Phenylobacterium sp. 20VBR1
1	root	cellular organisms	Eukaryota	Opisthokonta	Fungi	Dikarya	Ascomycota	saccharomyceta	Pezizomycotina	leotiomyceta	sordariomyceta	Sordariomycetes	Sordariomycetidae	Diaporthales	Diaporthaceae	unclassified Diaporthaceae	Diaporthaceae sp. PMI_573
1	root	cellular organisms	Bacteria	Proteobacteria	Alphaproteobacteria	Hyphomicrobiales	Reyranellaceae	Reyranella	unclassified Reyranella	Reyranella sp. MMS21-HV4-11
1	root	cellular organisms	Bacteria	Proteobacteria	Betaproteobacteria	Burkholderiales	Burkholderiaceae	Polynucleobacter	unclassified Polynucleobacter	Polynucleobacter sp. AP-Kaivos-20-H2
1	root	cellular organisms	Bacteria	Terrabacteria group	Firmicutes	Bacilli	Bacillales	Paenibacillaceae	Paenibacillus	Paenibacillus fonticola
1	root	cellular organisms	Eukaryota	Opisthokonta	Fungi	Dikarya	Ascomycota	saccharomyceta	Saccharomycotina	Saccharomycetes	Saccharomycetales	Dipodascaceae	Geotrichum	Geotrichum candidum
1	root	cellular organisms	Eukaryota	Opisthokonta	Fungi	Dikarya	Ascomycota	saccharomyceta	Pezizomycotina	leotiomyceta	Eurotiomycetes	Eurotiomycetidae	Eurotiales	Aspergillaceae	Aspergillus	Aspergillus indologenus	Aspergillus indologenus CBS 114.80
1	root	cellular organisms	Bacteria	Terrabacteria group	Actinobacteria	Actinomycetia	Streptosporangiales	Streptosporangiaceae	Nonomuraea	Nonomuraea solani
1	root	cellular organisms	Bacteria	Terrabacteria group	Actinobacteria	Actinomycetia	Micrococcales	Micrococcaceae	Arthrobacter	Arthrobacter echini
1	root	cellular organisms	Bacteria	FCB group	Bacteroidetes/Chlorobi group	Bacteroidetes	Cytophagia	Cytophagales	Fulvivirgaceae	Fulvivirga	unclassified Fulvivirga	Fulvivirga sp. W9P-11
1	root	cellular organisms	Eukaryota	Opisthokonta	Fungi	Dikarya	Ascomycota	saccharomyceta	Pezizomycotina	leotiomyceta	sordariomyceta
1	root	cellular organisms	Bacteria	Proteobacteria	Alphaproteobacteria	Rhodobacterales	Rhodobacteraceae	Thermohalobaculum	Thermohalobaculum xanthum
1	root	cellular organisms	Eukaryota	Opisthokonta	Fungi	Dikarya	Ascomycota	saccharomyceta	Pezizomycotina	leotiomyceta	dothideomyceta	Dothideomycetes	Dothideomycetidae	Mycosphaerellales	Teratosphaeriaceae	Salinomyces	Salinomyces thailandica
1	root	cellular organisms	Bacteria	Proteobacteria	Alphaproteobacteria	Hyphomicrobiales	Phyllobacteriaceae	Lentilitoribacter	unclassified Lentilitoribacter	Lentilitoribacter sp. Alg239-R112
1	root	cellular organisms	Bacteria	FCB group	Bacteroidetes/Chlorobi group	Bacteroidetes	Bacteroidia	Bacteroidales	Bacteroidaceae
1	root	cellular organisms	Eukaryota	Opisthokonta	Fungi	Dikarya	Basidiomycota	Ustilaginomycotina	Exobasidiomycetes	Ceraceosorales	Ceraceosoraceae	Ceraceosorus
1	root	cellular organisms	Bacteria	PVC group	Planctomycetes	Planctomycetia	unclassified Planctomycetia	Planctomycetia bacterium
1	root	cellular organisms	Bacteria	Terrabacteria group	Actinobacteria	Actinomycetia	Frankiales	Frankiaceae	Frankia	unclassified Frankia	Frankia sp. EI5c
1	root	cellular organisms	Bacteria	Proteobacteria	Alphaproteobacteria	Sphingomonadales	Erythrobacteraceae
1	root	Viruses	unclassified viruses	unclassified DNA viruses	unclassified dsDNA viruses	Pandoravirus	Pandoravirus salinus
1	root	cellular organisms	Bacteria	PVC group	Planctomycetes	Planctomycetia	Pirellulales	Pirellulaceae	Blastopirellula	Blastopirellula retiformator
1	root	cellular organisms	Bacteria	Terrabacteria group	Actinobacteria	Actinomycetia	Streptosporangiales	Thermomonosporaceae	Actinoallomurus	Actinoallomurus bryophytorum
1	root	cellular organisms	Bacteria	FCB group	Bacteroidetes/Chlorobi group	Bacteroidetes	Cytophagia	Cytophagales	Hymenobacteraceae	Hymenobacter	Hymenobacter ruricola
1	root	cellular organisms	Bacteria	Proteobacteria	Gammaproteobacteria	Moraxellales	Moraxellaceae	Psychrobacter	Psychrobacter vallis
1	root	cellular organisms	Bacteria	Nitrospirae	Thermodesulfovibrionia	Thermodesulfovibrionales	Thermodesulfovibrionaceae	Thermodesulfovibrio	unclassified Thermodesulfovibrio	Thermodesulfovibrio sp. RBG_19FT_COMBO_41_18
1	root	cellular organisms	Bacteria	FCB group	Bacteroidetes/Chlorobi group	Bacteroidetes	Flavobacteriia	Flavobacteriales	Flavobacteriaceae	Flavobacterium	Flavobacterium turcicum
1	root	cellular organisms	Bacteria	Terrabacteria group	Actinobacteria	Actinomycetia	Streptosporangiales	Thermomonosporaceae	Actinomadura	unclassified Actinomadura	Actinomadura sp. 7K507
1	root	Viruses	Varidnaviria	Bamfordvirae	Preplasmiviricota	Polintoviricetes	Orthopolintovirales	Adintoviridae	Mytilus Mediterranean mussel adintovirus
1	root	cellular organisms	Bacteria	Terrabacteria group	Actinobacteria	Actinomycetia	Streptosporangiales	Streptosporangiaceae
1	root	cellular organisms	Bacteria	Proteobacteria	Alphaproteobacteria	Rhodobacterales	Rhodobacteraceae	Rhodobacter	unclassified Rhodobacter	Rhodobacter sp. SGA-6-6
1	root	cellular organisms	Bacteria	Terrabacteria group	Firmicutes	Bacilli	Bacillales	Bacillaceae	Bacillus	Bacillus cereus group	Bacillus anthracis
1	root	cellular organisms	Bacteria	FCB group	Bacteroidetes/Chlorobi group	Bacteroidetes	Bacteroidia	Bacteroidales	Prevotellaceae	Prevotella	environmental samples	Prevotella sp. CAG:386
1	root	cellular organisms	Eukaryota	Opisthokonta	Fungi	Dikarya	Ascomycota	saccharomyceta	Pezizomycotina	leotiomyceta	sordariomyceta	Sordariomycetes	Hypocreomycetidae	Hypocreales	Nectriaceae	Fusarium	Fusarium sambucinum species complex	Fusarium graminearum
1	root	cellular organisms	Bacteria	Proteobacteria	Gammaproteobacteria	Vibrionales	Vibrionaceae	Photobacterium
1	root	cellular organisms	Eukaryota	Opisthokonta	Fungi	Fungi incertae sedis	Mucoromycota	Mucoromycotina	Mucoromycetes	Mucorales	Lichtheimiaceae	Lichtheimia
1	root	cellular organisms	Eukaryota	Opisthokonta	Fungi	Dikarya	Ascomycota	saccharomyceta	Saccharomycotina	Saccharomycetes	Saccharomycetales	CUG-Ser1 clade	Debaryomycetaceae	Millerozyma	Millerozyma farinosa	Millerozyma farinosa CBS 7064
1	root	cellular organisms	Bacteria	Proteobacteria	Betaproteobacteria	Burkholderiales	Burkholderiaceae	Polynucleobacter	unclassified Polynucleobacter	Polynucleobacter sp. AP-Titi-500A-B4
1	root	cellular organisms	Eukaryota	Opisthokonta	Fungi	Dikarya	Ascomycota	saccharomyceta	Pezizomycotina	leotiomyceta	dothideomyceta	Dothideomycetes	Pleosporomycetidae	Pleosporales	Pleosporineae	Cucurbitariaceae	Pyrenochaeta	unclassified Pyrenochaeta	Pyrenochaeta sp. DS3sAY3a
1	root	cellular organisms	Bacteria	FCB group	Bacteroidetes/Chlorobi group	Bacteroidetes	Cytophagia	Cytophagales	Cytophagaceae	Aquirufa	unclassified Aquirufa	Aquirufa sp. 9H-EGSE
1	root	cellular organisms	Eukaryota	Discoba	Euglenozoa	Euglenida	Spirocuta	Euglenophyceae	Euglenales	Euglenaceae	Euglena	Euglena geniculata
1	root	cellular organisms	Eukaryota	Opisthokonta	Fungi	Dikarya	Ascomycota	saccharomyceta	Pezizomycotina	leotiomyceta	sordariomyceta	Leotiomycetes	Leotiomycetes incertae sedis	Pseudeurotiaceae	Pseudogymnoascus	unclassified Pseudogymnoascus	Pseudogymnoascus sp. 23342-1-I1
1	root	cellular organisms	Bacteria	Bacteria incertae sedis	Bacteria candidate phyla	Candidatus Coatesbacteria	Candidatus Coatesbacteria bacterium
1	root	cellular organisms	Eukaryota	Opisthokonta	Fungi	Dikarya	Basidiomycota	Agaricomycotina	Dacrymycetes	Dacrymycetales	Dacrymycetaceae	Calocera
1	root	cellular organisms	Bacteria	Proteobacteria	Alphaproteobacteria	Hyphomicrobiales	Hyphomicrobiaceae	unclassified Hyphomicrobiaceae	Hyphomicrobiaceae bacterium
1	root	cellular organisms	Bacteria	PVC group	Verrucomicrobia	Verrucomicrobiae	Verrucomicrobiales	Verrucomicrobiaceae	Luteolibacter	unclassified Luteolibacter	Luteolibacter sp. NBU1238
1	root	cellular organisms	Bacteria	Terrabacteria group	Tenericutes	Mollicutes	Mycoplasmatales	Mycoplasmataceae	Mycoplasma	unclassified Mycoplasma	Mycoplasma sp. E35C
1	root	cellular organisms	Bacteria	Terrabacteria group	Actinobacteria	Actinomycetia	Streptomycetales	Streptomycetaceae	Streptomyces	unclassified Streptomyces	Streptomyces sp. PTM05
1	root	Viruses	Duplodnaviria	Heunggongvirae	Uroviricota	Caudoviricetes	Caudovirales	Myoviridae	unclassified Myoviridae	Ralstonia phage RsoM2USA
1	root	cellular organisms	Bacteria	Proteobacteria	Betaproteobacteria	Burkholderiales	Comamonadaceae	Rhodoferax
1	root	cellular organisms	Bacteria	Proteobacteria	Gammaproteobacteria	Moraxellales	Moraxellaceae	Acinetobacter	Acinetobacter wuhouensis
1	root	cellular organisms	Bacteria	Terrabacteria group	Firmicutes	Clostridia	Eubacteriales	Peptococcaceae	Desulfosporosinus	Candidatus Desulfosporosinus infrequens
1	root	cellular organisms	Bacteria	Terrabacteria group	Firmicutes	Bacilli	Bacillales	Bacillaceae	Oceanobacillus	Oceanobacillus jeddahense
1	root	cellular organisms	Bacteria	Terrabacteria group	Firmicutes	Bacilli	Bacillales	Paenibacillaceae	Paenibacillus	unclassified Paenibacillus	Paenibacillus sp. YN15
1	root	cellular organisms	Bacteria	Proteobacteria	Gammaproteobacteria	Moraxellales	Moraxellaceae	Acinetobacter	Acinetobacter tianfuensis
1	root	cellular organisms	Bacteria	Proteobacteria	Gammaproteobacteria	Moraxellales	Moraxellaceae	Acinetobacter	unclassified Acinetobacter	Acinetobacter sp. ANC 3813
1	root	cellular organisms	Bacteria	Bacteria incertae sedis	Bacteria candidate phyla	Candidatus Fischerbacteria	Candidatus Fischerbacteria bacterium RBG_13_37_8
1	root	cellular organisms	Bacteria	FCB group	Bacteroidetes/Chlorobi group	Bacteroidetes	Cytophagia	Cytophagales	Fulvivirgaceae	Ohtaekwangia	Ohtaekwangia koreensis
1	root	cellular organisms	Bacteria	Proteobacteria	Gammaproteobacteria	Moraxellales	Moraxellaceae	Acinetobacter	unclassified Acinetobacter	Acinetobacter sp. YT-02
1	root	cellular organisms	Eukaryota	Opisthokonta	Fungi	Dikarya	Ascomycota	saccharomyceta	Pezizomycotina	leotiomyceta	Eurotiomycetes	Chaetothyriomycetidae	Chaetothyriales	Herpotrichiellaceae	Capronia
1	root	cellular organisms	Bacteria	FCB group	Bacteroidetes/Chlorobi group	Bacteroidetes	Flavobacteriia	Flavobacteriales	Flavobacteriaceae	Maribacter	unclassified Maribacter	Maribacter sp. MAR_2009_72
1	root	cellular organisms	Bacteria	Proteobacteria	Alphaproteobacteria	Rhodobacterales	Rhodobacteraceae	Tritonibacter	Tritonibacter multivorans
1	root	cellular organisms	Bacteria	Terrabacteria group	Actinobacteria	Actinomycetia	Streptomycetales	Streptomycetaceae	Streptomyces	unclassified Streptomyces	Streptomyces sp. ISL-96
1	root	cellular organisms	Eukaryota	Opisthokonta	Fungi	Dikarya	Basidiomycota	Agaricomycotina	Agaricomycetes	Agaricomycetes incertae sedis	Russulales	Lachnocladiaceae	Vararia	Vararia minispora	Vararia minispora EC-137
1	root	cellular organisms	Bacteria	Proteobacteria	Alphaproteobacteria	Hyphomicrobiales	Stappiaceae	Labrenzia	unclassified Labrenzia	Labrenzia sp. CP4
1	root	cellular organisms	Eukaryota	Sar	Stramenopiles	Ochrophyta	Synurophyceae	Synurales	Mallomonadaceae	Synura	Synura uvella
1	root	cellular organisms	Bacteria	Proteobacteria	delta/epsilon subdivisions	Deltaproteobacteria	Desulfuromonadales	Geobacteraceae	Geotalea	Geotalea uraniireducens
1	root	cellular organisms	Bacteria	PVC group	Planctomycetes	Planctomycetia	Pirellulales	Pirellulaceae	Rosistilla	Rosistilla carotiformis
1	root	cellular organisms	Bacteria	Proteobacteria	Gammaproteobacteria	Vibrionales	Vibrionaceae	Vibrio	Vibrio harveyi group	Vibrio alginolyticus	Vibrio alginolyticus NBRC 15630 = ATCC 17749
1	root	cellular organisms	Bacteria	Bacteria incertae sedis	Bacteria candidate phyla	Patescibacteria group	Microgenomates group	Candidatus Levybacteria	Candidatus Levybacteria bacterium GW2011_GWC2_40_7
1	root	cellular organisms	Bacteria	Proteobacteria	delta/epsilon subdivisions	Epsilonproteobacteria	Campylobacterales	Campylobacteraceae	Sulfurospirillum	Sulfurospirillum multivorans
1	root	cellular organisms	Bacteria	Proteobacteria	Betaproteobacteria	Burkholderiales	Burkholderiaceae	Polynucleobacter	unclassified Polynucleobacter	Polynucleobacter sp. MWH-UH21B
1	root	cellular organisms	Bacteria	Spirochaetes	Spirochaetia	Brachyspirales	Brachyspiraceae	Brachyspira	Brachyspira catarrhinii
1	root	cellular organisms	Bacteria	Proteobacteria	Betaproteobacteria	Burkholderiales	Comamonadaceae	Macromonas	unclassified Macromonas	Macromonas sp. BK-30
1	root	cellular organisms	Eukaryota	Opisthokonta	Fungi	Dikarya	Ascomycota	saccharomyceta	Saccharomycotina	Saccharomycetes	Saccharomycetales	CUG-Ser1 clade	Metschnikowiaceae	Metschnikowia	Metschnikowia bicuspidata
1	root	cellular organisms	Bacteria	Terrabacteria group	Actinobacteria	Actinomycetia	Streptomycetales	Streptomycetaceae	Streptomyces	Streptomyces hydrogenans
1	root	cellular organisms	Bacteria	Terrabacteria group	Actinobacteria	Actinomycetia	Micromonosporales	Micromonosporaceae	Micromonospora	unclassified Micromonospora	Micromonospora sp. RP3T
1	root	cellular organisms	Bacteria	Terrabacteria group	Actinobacteria	Actinomycetia	Corynebacteriales	Nocardiaceae	Nocardia	Nocardia transvalensis
1	root	cellular organisms	Bacteria	Bacteria incertae sedis	Bacteria candidate phyla	Patescibacteria group	Parcubacteria group	Candidatus Sungbacteria	Candidatus Sungbacteria bacterium RIFCSPHIGHO2_02_FULL_47_11
1	root	cellular organisms	Bacteria	Terrabacteria group	Firmicutes	Bacilli	Bacillales	Paenibacillaceae	Paenibacillus	Paenibacillus elgii
1	root	cellular organisms	Bacteria	Proteobacteria	delta/epsilon subdivisions	Deltaproteobacteria	Desulfuromonadales	Geobacteraceae	Geobacter	unclassified Geobacter	Geobacter sp. SVR
1	root	cellular organisms	Eukaryota	Opisthokonta	Fungi	Dikarya	Ascomycota	saccharomyceta	Pezizomycotina	leotiomyceta	sordariomyceta	Sordariomycetes	Hypocreomycetidae	Hypocreales	Bionectriaceae	Clonostachys
1	root	cellular organisms	Bacteria	Spirochaetes	Spirochaetia	Brachyspirales	Brachyspiraceae	Brachyspira	Brachyspira pilosicoli
1	root	cellular organisms	Eukaryota	Opisthokonta	Fungi	Dikarya	Basidiomycota	Agaricomycotina	Agaricomycetes	Agaricomycetes incertae sedis	Gloeophyllales
1	root	cellular organisms	Bacteria	Terrabacteria group	Chloroflexi	unclassified Chloroflexi	Chloroflexi bacterium ADurb.Bin222
1	root	cellular organisms	Bacteria	Proteobacteria	delta/epsilon subdivisions	Deltaproteobacteria	Desulfobacterales	Desulfobulbaceae	unclassified Desulfobulbaceae	Desulfobulbaceae bacterium A2
1	root	cellular organisms	Bacteria	FCB group	Bacteroidetes/Chlorobi group	Bacteroidetes	Cytophagia	Cytophagales	Hymenobacteraceae	Pontibacter	Pontibacter burrus
1	root	cellular organisms	Bacteria	FCB group	Bacteroidetes/Chlorobi group	Balneolaeota	Balneolia	Balneolales	Balneolaceae	Aliifodinibius
1	root	cellular organisms	Bacteria	Terrabacteria group	Firmicutes	Clostridia	Eubacteriales	Lachnospiraceae	Roseburia
1	root	cellular organisms	Bacteria	Terrabacteria group	Firmicutes	Clostridia	Thermoanaerobacterales	Thermodesulfobiaceae	Thermodesulfobium	Thermodesulfobium acidiphilum
1	root	cellular organisms	Bacteria	Proteobacteria	delta/epsilon subdivisions	Deltaproteobacteria	Desulfovibrionales	unclassified Desulfovibrionales	Desulfovibrionales bacterium
1	root	cellular organisms	Bacteria	FCB group	Bacteroidetes/Chlorobi group	Bacteroidetes	Cytophagia	Cytophagales	Hymenobacteraceae	Adhaeribacter	Adhaeribacter rhizoryzae
1	root	cellular organisms	Bacteria	Proteobacteria	Betaproteobacteria	Burkholderiales	Burkholderiaceae	Polynucleobacter	unclassified Polynucleobacter	Polynucleobacter sp. MWH-P3-07-1
1	root	cellular organisms	Bacteria	Proteobacteria	Alphaproteobacteria	Hyphomicrobiales	Methylobacteriaceae	Methylobacterium	unclassified Methylobacterium
1	root	cellular organisms	Bacteria	Terrabacteria group	Firmicutes	Clostridia	Eubacteriales	Clostridiaceae	Clostridium	Clostridium homopropionicum
1	root	cellular organisms	Bacteria	Proteobacteria	Gammaproteobacteria	Thiotrichales	Fastidiosibacteraceae	Cysteiniphilum	Cysteiniphilum marinum
1	root	cellular organisms	Bacteria	FCB group	Bacteroidetes/Chlorobi group	Bacteroidetes	Flavobacteriia	Flavobacteriales	Flavobacteriaceae	Salinimicrobium	Salinimicrobium marinum
1	root	cellular organisms	Bacteria	Proteobacteria	Alphaproteobacteria	Rickettsiales	Rickettsiaceae	Candidatus Megaira	unclassified Candidatus Megaira	Candidatus Megaira endosymbiont of Carteria cerasiformis
1	root	cellular organisms	Eukaryota	Discoba	Euglenozoa	Kinetoplastea	Metakinetoplastina	Trypanosomatida	Trypanosomatidae	Leishmaniinae	Porcisia	Porcisia hertigi
1	root	cellular organisms	Bacteria	FCB group	Bacteroidetes/Chlorobi group	Bacteroidetes	Flavobacteriia	Flavobacteriales	Flavobacteriaceae	Flavobacterium	unclassified Flavobacterium	Flavobacterium sp. CG_9.10
1	root	cellular organisms	Bacteria	Fusobacteria	Fusobacteriia	Fusobacteriales	Leptotrichiaceae	Leptotrichia	Leptotrichia hofstadii
1	root	cellular organisms	Bacteria	PVC group	Verrucomicrobia	environmental samples	uncultured Verrucomicrobia bacterium
1	root	Viruses	Duplodnaviria	Heunggongvirae	Uroviricota	Caudoviricetes	Caudovirales	Myoviridae	unclassified Myoviridae	Pseudoalteromonas virus J2-1	Pseudoalteromonas phage J2-1
1	root	cellular organisms	Bacteria	Terrabacteria group	Actinobacteria	Actinomycetia	Streptosporangiales	Streptosporangiaceae	Nonomuraea	Nonomuraea angiospora
1	root	cellular organisms	Eukaryota	Opisthokonta	Fungi	Dikarya	Ascomycota	saccharomyceta	Pezizomycotina	leotiomyceta	sordariomyceta	Sordariomycetes	Hypocreomycetidae	Glomerellales	Glomerellaceae	Colletotrichum	Colletotrichum gloeosporioides species complex
1	root	Viruses	Duplodnaviria	Heunggongvirae	Uroviricota	Caudoviricetes	Caudovirales	Myoviridae	unclassified Myoviridae	Listeria phage LPJP1
2	root	cellular organisms	Bacteria	Proteobacteria	delta/epsilon subdivisions	Deltaproteobacteria	Desulfuromonadales	Geobacteraceae	Geoalkalibacter	Geoalkalibacter subterraneus
1	root	cellular organisms	Bacteria	Terrabacteria group	Actinobacteria	Actinomycetia	Propionibacteriales	Nocardioidaceae	Marmoricola	Marmoricola solisilvae
1	root	cellular organisms	Bacteria	Terrabacteria group	Actinobacteria	Actinomycetia	Streptomycetales	Streptomycetaceae	Streptomyces	unclassified Streptomyces	Streptomyces sp. MBT33
1	root	cellular organisms	Bacteria	Proteobacteria	Gammaproteobacteria	Alteromonadales	Alteromonadaceae	Alteromonas/Salinimonas group	Alteromonas	Alteromonas genovensis
1	root	cellular organisms	Eukaryota	Opisthokonta	Fungi	Dikarya	Basidiomycota	Agaricomycotina	Agaricomycetes	Phallomycetidae
1	root	cellular organisms	Bacteria	Terrabacteria group	Actinobacteria	Actinomycetia	Streptomycetales	Streptomycetaceae	Streptomyces	Streptomyces albicerus
1	root	cellular organisms	Eukaryota	Opisthokonta	Fungi	Dikarya	Ascomycota	saccharomyceta	Pezizomycotina	leotiomyceta	sordariomyceta	Sordariomycetes	Hypocreomycetidae	Hypocreales	Hypocreaceae	Trichoderma	Trichoderma arundinaceum
1	root	cellular organisms	Bacteria	Proteobacteria	Gammaproteobacteria	Pseudomonadales	Pseudomonadaceae	Pseudomonas	Pseudomonas karstica
1	root	cellular organisms	Eukaryota	Opisthokonta	Fungi	Dikarya	Ascomycota	saccharomyceta	Pezizomycotina	leotiomyceta	dothideomyceta	Dothideomycetes	Pleosporomycetidae	Pleosporales	Tetraplosphaeriaceae	Polyplosphaeria	Polyplosphaeria fusca
1	root	cellular organisms	Bacteria	FCB group	Bacteroidetes/Chlorobi group	Bacteroidetes	Cytophagia	Cytophagales	Bernardetiaceae	Bernardetia	Bernardetia litoralis
1	root	cellular organisms	Eukaryota	Opisthokonta	Fungi	Dikarya	Ascomycota	saccharomyceta	Pezizomycotina	leotiomyceta	sordariomyceta	Leotiomycetes	Helotiales	Sclerotiniaceae	Sclerotinia	Sclerotinia trifoliorum
1	root	cellular organisms	Bacteria	Proteobacteria	Alphaproteobacteria	Rickettsiales	Anaplasmataceae	Ehrlichia
2	root	cellular organisms	Eukaryota	Opisthokonta	Fungi	Dikarya	Ascomycota	saccharomyceta	Pezizomycotina	Pezizomycetes	Pezizales	Pyronemataceae
1	root	cellular organisms	Eukaryota	Opisthokonta	Fungi	Fungi incertae sedis	Microsporidia	Tubulinosematoidea	Tubulinosematidae	Anncaliia	Anncaliia algerae	Anncaliia algerae PRA339
1	root	cellular organisms	Eukaryota	Opisthokonta	Fungi	Dikarya	Basidiomycota	Agaricomycotina	Agaricomycetes	Agaricomycetes incertae sedis	Sebacinales	Serendipitaceae	Serendipita	unclassified Serendipita
1	root	Viruses	Duplodnaviria	Heunggongvirae	Uroviricota	Caudoviricetes	Caudovirales	Siphoviridae	unclassified Siphoviridae	Erwinia phage Gungnir39
1	root	cellular organisms	Bacteria	PVC group	Candidatus Omnitrophica	unclassified Candidatus Omnitrophica	Omnitrophica bacterium GWA2_52_8
1	root	cellular organisms	Bacteria	Proteobacteria	Gammaproteobacteria	Aeromonadales	Aeromonadaceae	Tolumonas	Tolumonas auensis
1	root	cellular organisms	Bacteria	Proteobacteria	Gammaproteobacteria	Enterobacterales	Yersiniaceae	Rahnella	Rahnella contaminans
1	root	cellular organisms	Eukaryota	Opisthokonta	Fungi	Dikarya	Basidiomycota	Pucciniomycotina	Pucciniomycetes	Pucciniales	Pucciniaceae	Puccinia	Puccinia graminis	Puccinia graminis f. sp. tritici
1	root	cellular organisms	Eukaryota	Discoba	Euglenozoa	Euglenida	Spirocuta	Euglenophyceae	Euglenales	Euglenaceae	Euglena	Euglena clara
1	root	cellular organisms	Bacteria	Proteobacteria	Betaproteobacteria	Burkholderiales	Burkholderiaceae	Burkholderia	Burkholderia cepacia complex	Burkholderia cepacia
2	root	cellular organisms	Eukaryota	Opisthokonta	Fungi	Dikarya	Basidiomycota	Agaricomycotina	Agaricomycetes	Agaricomycetidae	Boletales	Suillineae	Suillaceae	Suillus
1	root	cellular organisms	Bacteria	Terrabacteria group	Firmicutes	Clostridia	Eubacteriales	Lachnospiraceae	Robinsoniella	unclassified Robinsoniella	Robinsoniella sp. KNHs210
1	root	cellular organisms	Bacteria	Terrabacteria group	Actinobacteria	Thermoleophilia	Solirubrobacterales	unclassified Solirubrobacterales	Solirubrobacterales bacterium
1	root	cellular organisms	Bacteria	Terrabacteria group	Firmicutes	Bacilli	Lactobacillales	Streptococcaceae	Streptococcus	Streptococcus castoreus
1	root	cellular organisms	Bacteria	FCB group	Bacteroidetes/Chlorobi group	Bacteroidetes	Flavobacteriia	Flavobacteriales	Weeksellaceae	Chryseobacterium group	Chryseobacterium	Chryseobacterium gleum
1	root	cellular organisms	Eukaryota	Opisthokonta	Fungi	Dikarya	Ascomycota	saccharomyceta	Saccharomycotina	Saccharomycetes	Saccharomycetales	Pichiaceae	Ogataea	Ogataea haglerorum
1	root	cellular organisms	Bacteria	Proteobacteria	Alphaproteobacteria	Rhodospirillales	Rhodospirillaceae	unclassified Rhodospirillaceae	Rhodospirillaceae bacterium TMED23
1	root	cellular organisms	Bacteria	Proteobacteria	Gammaproteobacteria	Alteromonadales	Alteromonadaceae	Alteromonas/Salinimonas group	Salinimonas	Salinimonas marina
2	root	cellular organisms	Eukaryota	Opisthokonta	Fungi	Dikarya	Ascomycota	saccharomyceta	Pezizomycotina	leotiomyceta	Eurotiomycetes	Eurotiomycetidae	Eurotiales	Aspergillaceae	Penicillium	Penicillium nalgiovense
1	root	cellular organisms	Eukaryota	Discoba	Euglenozoa	Kinetoplastea	Metakinetoplastina	Trypanosomatida	Trypanosomatidae	Trypanosoma	Nannomonas	Trypanosoma congolense	Trypanosoma congolense IL3000
1	root	cellular organisms	Eukaryota	Opisthokonta	Fungi	Dikarya	Ascomycota	saccharomyceta	Pezizomycotina	leotiomyceta	Eurotiomycetes	Eurotiomycetidae	Eurotiales	Aspergillaceae	Penicillium	Penicillium italicum
2	root	cellular organisms	Bacteria	Proteobacteria	Gammaproteobacteria	Chromatiales	Chromatiaceae	Thiocystis	Thiocystis minor
1	root	cellular organisms	Bacteria	FCB group	Bacteroidetes/Chlorobi group	Bacteroidetes	Flavobacteriia	Flavobacteriales	Weeksellaceae	Chryseobacterium group	Soonwooa	Soonwooa buanensis
1	root	cellular organisms	Bacteria	Terrabacteria group	Firmicutes	Bacilli	Bacillales	Alicyclobacillaceae	Tumebacillus	unclassified Tumebacillus	Tumebacillus sp. BK434
1	root	cellular organisms	Bacteria	FCB group	Bacteroidetes/Chlorobi group	Bacteroidetes	Bacteroidia	Marinilabiliales	Marinilabiliaceae	Marinilabilia	Marinilabilia salmonicolor
1	root	cellular organisms	Bacteria	Deferribacteres	Deferribacteres	Deferribacterales	Deferribacteraceae	Denitrovibrio	unclassified Denitrovibrio	Denitrovibrio sp.
1	root	cellular organisms	Bacteria	Proteobacteria	Alphaproteobacteria	Rhodobacterales	unclassified Rhodobacterales	Rhodobacterales bacterium
1	root	cellular organisms	Bacteria	Bacteria incertae sedis	Bacteria candidate phyla	Candidatus Aerophobetes	unclassified Aerophobetes	Candidatus Aerophobetes bacterium
1	root	cellular organisms	Eukaryota	Opisthokonta	Fungi	Fungi incertae sedis	Mucoromycota	Mortierellomycotina	Mortierellomycetes	Mortierellales	Mortierellaceae	Linnemannia	Linnemannia schmuckeri
1	root	cellular organisms	Bacteria	FCB group	Bacteroidetes/Chlorobi group	Bacteroidetes	unclassified Bacteroidetes	Bacteroidetes bacterium 37-13
1	root	cellular organisms	Bacteria	FCB group	Bacteroidetes/Chlorobi group	Ignavibacteriae	Ignavibacteria	unclassified Ignavibacteria	Ignavibacteria bacterium RIFOXYA2_FULL_37_17
1	root	cellular organisms	Bacteria	Proteobacteria	Betaproteobacteria	Burkholderiales	Alcaligenaceae	Taylorella	Taylorella asinigenitalis
1	root	cellular organisms	Bacteria	Proteobacteria	Betaproteobacteria	Rhodocyclales	Zoogloeaceae	Azoarcus	unclassified Azoarcus	Azoarcus sp. DN11
1	root	cellular organisms	Bacteria	FCB group	Bacteroidetes/Chlorobi group	Bacteroidetes	Flavobacteriia	Flavobacteriales	Flavobacteriaceae	Gramella	unclassified Gramella	Gramella sp. Hel_I_59
1	root	cellular organisms	Bacteria	Proteobacteria	Betaproteobacteria	Burkholderiales	Oxalobacteraceae	Massilia group	Massilia	Massilia ginsengisoli
1	root	cellular organisms	Bacteria	Proteobacteria	Gammaproteobacteria	unclassified Gammaproteobacteria	Gammaproteobacteria bacterium HGW-Gammaproteobacteria-8
1	root	cellular organisms	Bacteria	FCB group	Bacteroidetes/Chlorobi group	Bacteroidetes	Bacteroidia	Bacteroidales	Bacteroidaceae	Bacteroides	Bacteroides acidifaciens
1	root	cellular organisms	Eukaryota	Opisthokonta	Fungi	Dikarya	Ascomycota	saccharomyceta	Pezizomycotina	leotiomyceta	dothideomyceta	Dothideomycetes	Pleosporomycetidae	Pleosporales	Pleosporineae	Pleosporaceae	Bipolaris	Bipolaris zeicola	Bipolaris zeicola 26-R-13
1	root	cellular organisms	Bacteria	PVC group	Planctomycetes	Planctomycetia	Gemmatales	Gemmataceae	Frigoriglobus	Frigoriglobus tundricola
1	root	cellular organisms	Bacteria	Proteobacteria	Alphaproteobacteria	Rhodobacterales	Rhodobacteraceae	Tabrizicola	Tabrizicola algicola
1	root	cellular organisms	Eukaryota	Opisthokonta	Fungi	Dikarya	Ascomycota	saccharomyceta	Pezizomycotina	leotiomyceta	sordariomyceta	Sordariomycetes	Hypocreomycetidae	Glomerellales	Glomerellaceae	Colletotrichum	Colletotrichum destructivum species complex	Colletotrichum shisoi
1	root	cellular organisms	Bacteria	Proteobacteria	Alphaproteobacteria	Rhodobacterales	Rhodobacteraceae	Thioclava	unclassified Thioclava	Thioclava sp. JM3
2	root	cellular organisms	Bacteria	Proteobacteria	Alphaproteobacteria	Rhodospirillales	Azospirillaceae	Azospirillum
1	root	cellular organisms	Bacteria	PVC group	unclassified PVC group	PVC group bacterium (ex Bugula neritina AB1)
1	root	cellular organisms	Bacteria	Terrabacteria group	Firmicutes	Bacilli	Lactobacillales	Streptococcaceae	Lactococcus
1	root	cellular organisms	Bacteria	PVC group	Verrucomicrobia	Spartobacteria	Chthoniobacterales	environmental samples	uncultured Chthoniobacterales bacterium
1	root	cellular organisms	Bacteria	Proteobacteria	Gammaproteobacteria	Alteromonadales	Shewanellaceae	Shewanella	Shewanella decolorationis	Shewanella decolorationis S12
1	root	cellular organisms	Eukaryota	Opisthokonta	Fungi	Dikarya	Basidiomycota	Agaricomycotina	Agaricomycetes	Agaricomycetes incertae sedis	Polyporales	Podoscyphaceae	Abortiporus	Abortiporus biennis
1	root	cellular organisms	Bacteria	Proteobacteria	Gammaproteobacteria	Legionellales	Legionellaceae	Legionella	unclassified Legionella	Legionella sp. km772
1	root	cellular organisms	Bacteria	Proteobacteria	Betaproteobacteria	Rhodocyclales	Azonexaceae	Dechloromonas	Dechloromonas denitrificans
2	root	cellular organisms	Bacteria	FCB group	Candidatus Latescibacteria	unclassified Candidatus Latescibacteria	Candidatus Latescibacteria bacterium
1	root	cellular organisms	Bacteria	PVC group	Planctomycetes	Planctomycetia	Pirellulales	Lacipirellulaceae	Posidoniimonas	Posidoniimonas polymericola
1	root	cellular organisms	Eukaryota	Opisthokonta	Fungi	Dikarya	Ascomycota	saccharomyceta	Pezizomycotina	Pezizomycetes	Pezizales	Pezizaceae
1	root	cellular organisms	Bacteria	Proteobacteria	Gammaproteobacteria	Alteromonadales	Alteromonadaceae	Alteromonas/Salinimonas group	Alteromonas	Alteromonas pelagimontana
1	root	cellular organisms	Bacteria	Proteobacteria	Alphaproteobacteria	Rickettsiales	Rickettsiaceae	Candidatus Megaira	Candidatus Megaira polyxenophila
1	root	cellular organisms	Bacteria	Terrabacteria group	Deinococcus-Thermus	Deinococci	Deinococcales	Deinococcaceae	Deinococcus	Deinococcus aquiradiocola
1	root	cellular organisms	Bacteria	Proteobacteria	Betaproteobacteria	Nitrosomonadales	Nitrosomonadaceae	Nitrosospira	unclassified Nitrosospira	Nitrosospira sp. Nsp2
1	root	cellular organisms	Bacteria	Proteobacteria	Gammaproteobacteria	Aeromonadales	Aeromonadaceae	Aeromonas	Aeromonas salmonicida
1	root	cellular organisms	Bacteria	unclassified Bacteria	bacterium HR17
1	root	cellular organisms	Bacteria	Proteobacteria	Betaproteobacteria	Burkholderiales	Comamonadaceae	Comamonas	unclassified Comamonas	Comamonas sp. CMM03
1	root	cellular organisms	Bacteria	Terrabacteria group	Firmicutes	Clostridia	Eubacteriales	Defluviitaleaceae	Defluviitalea	Defluviitalea phaphyphila
1	root	cellular organisms	Bacteria	Proteobacteria	Betaproteobacteria	Burkholderiales	Comamonadaceae	Rhodoferax	unclassified Rhodoferax	Rhodoferax sp. TS-BS-61-7
1	root	cellular organisms	Bacteria	Proteobacteria	Alphaproteobacteria	Rhodobacterales	Rhodobacteraceae	Rhodobacter	Rhodobacter sediminicola
1	root	cellular organisms	Eukaryota	Opisthokonta	Fungi	Dikarya	Basidiomycota	Agaricomycotina	Agaricomycetes	Agaricomycetidae	Agaricales	Schizophyllaceae	Schizophyllum	Schizophyllum commune	Schizophyllum commune H4-8
1	root	Viruses	Duplodnaviria	Heunggongvirae	Uroviricota	Caudoviricetes	Caudovirales	Podoviridae	unclassified Podoviridae	crAss-like viruses	CrAss-like virus sp. ctelJ1
1	root	cellular organisms	Bacteria	Proteobacteria	Betaproteobacteria	Burkholderiales	Comamonadaceae	Ramlibacter	Ramlibacter tataouinensis
1	root	cellular organisms	Bacteria	Proteobacteria	Alphaproteobacteria	Rhodobacterales	Roseobacteraceae	Roseovarius	unclassified Roseovarius	Roseovarius sp. SHN287
1	root	cellular organisms	Bacteria	Proteobacteria	Alphaproteobacteria	Rhodobacterales	Roseobacteraceae	Heliomarina	Heliomarina baculiformis
1	root	cellular organisms	Bacteria	Proteobacteria	Gammaproteobacteria	Moraxellales	Moraxellaceae	Acinetobacter	Acinetobacter tandoii
1	root	cellular organisms	Bacteria	Terrabacteria group	Actinobacteria	Actinomycetia	Micrococcales	Microbacteriaceae	Microbacterium	unclassified Microbacterium
1	root	cellular organisms	Archaea	Euryarchaeota
1	root	cellular organisms	Bacteria	Proteobacteria	Gammaproteobacteria	Enterobacterales	Enterobacteriaceae	unclassified Enterobacteriaceae	Enterobacteriaceae endosymbiont of Donacia provostii
1	root	cellular organisms	Bacteria	FCB group	Bacteroidetes/Chlorobi group	Bacteroidetes	Cytophagia	Cytophagales	Spirosomaceae	Emticicia	Emticicia aquatica
1	root	cellular organisms	Bacteria	Terrabacteria group	Firmicutes	Tissierellia	Tissierellales	Peptoniphilaceae	Parvimonas
1	root	cellular organisms	Bacteria	Terrabacteria group	Actinobacteria	Actinomycetia	Streptomycetales	Streptomycetaceae	Streptomyces	Streptomyces griseus group	Streptomyces albovinaceus subgroup	Streptomyces globisporus
1	root	cellular organisms	Bacteria	Proteobacteria	Alphaproteobacteria	Hyphomicrobiales	Rhizobiaceae	Rhizobium/Agrobacterium group	Agrobacterium	Agrobacterium larrymoorei
1	root	cellular organisms	Bacteria	Proteobacteria	Alphaproteobacteria	Rhodobacterales	Rhodobacteraceae	Pararhodobacter	Pararhodobacter aggregans
2	root	cellular organisms	Bacteria	Proteobacteria	Gammaproteobacteria	Alteromonadales	Shewanellaceae	Shewanella	Shewanella inventionis
1	root	cellular organisms	Eukaryota	Opisthokonta	Fungi	Dikarya	Ascomycota	saccharomyceta	Pezizomycotina	Orbiliomycetes	Orbiliales	Orbiliaceae	Dactylellina	Dactylellina haptotyla	Dactylellina haptotyla CBS 200.50
1	root	cellular organisms	Bacteria	Proteobacteria	Gammaproteobacteria	Pseudomonadales	Pseudomonadaceae	Pseudomonas	Pseudomonas moraviensis
1	root	cellular organisms	Bacteria	Terrabacteria group	Actinobacteria	Actinomycetia	Micrococcales	Microbacteriaceae	Rathayibacter
1	root	cellular organisms	Bacteria	Spirochaetes	Spirochaetia	Spirochaetales	Treponemataceae	Treponema	unclassified Treponema	Treponema sp. J25
1	root	cellular organisms	Bacteria	Terrabacteria group	Actinobacteria	Actinomycetia	Streptomycetales	Streptomycetaceae	Streptomyces	Streptomyces megasporus
2	root	cellular organisms	Eukaryota	Opisthokonta	Fungi	Dikarya	Basidiomycota	Wallemiomycotina	Wallemiomycetes	Wallemiales	Wallemiaceae	Wallemia	Wallemia mellicola
1	root	cellular organisms	Bacteria	Terrabacteria group	Actinobacteria	Actinomycetia	Streptosporangiales	Streptosporangiaceae	Microbispora	Microbispora amethystogenes
1	root	cellular organisms	Bacteria	Proteobacteria	Gammaproteobacteria	Pseudomonadales	Pseudomonadaceae	Pseudomonas	unclassified Pseudomonas	Pseudomonas sp. PGPR81
1	root	cellular organisms	Bacteria	Proteobacteria	Gammaproteobacteria	Moraxellales	Moraxellaceae	Psychrobacter	unclassified Psychrobacter	Psychrobacter sp. FME6
1	root	cellular organisms	Eukaryota	Opisthokonta	Fungi	Dikarya	Ascomycota	saccharomyceta	Saccharomycotina	Saccharomycetes	Saccharomycetales	Pichiaceae	Brettanomyces	Brettanomyces naardenensis
1	root	cellular organisms	Bacteria	Terrabacteria group	Actinobacteria	Actinomycetia	Micrococcales	Micrococcaceae	Nesterenkonia	Nesterenkonia sphaerica
1	root	cellular organisms	Bacteria	Proteobacteria	delta/epsilon subdivisions	Epsilonproteobacteria	Campylobacterales	Arcobacteraceae	Arcobacter
1	root	cellular organisms	Bacteria	Terrabacteria group	Firmicutes	Bacilli	Lactobacillales	Aerococcaceae	Facklamia	Facklamia miroungae
1	root	cellular organisms	Bacteria	Proteobacteria	Gammaproteobacteria	Enterobacterales	Morganellaceae	Xenorhabdus
1	root	cellular organisms	Bacteria	Terrabacteria group	Cyanobacteria/Melainabacteria group	Cyanobacteria	Pleurocapsales	Hyellaceae	Myxosarcina	unclassified Myxosarcina	Myxosarcina sp. GI1
1	root	cellular organisms	Bacteria	Terrabacteria group	Actinobacteria	Actinomycetia	Corynebacteriales	Mycobacteriaceae	Mycolicibacter
1	root	cellular organisms	Eukaryota	Opisthokonta	Fungi	Dikarya	Ascomycota	saccharomyceta	Saccharomycotina	Saccharomycetes	Saccharomycetales	Phaffomycetaceae	Cyberlindnera	Cyberlindnera jadinii
1	root	cellular organisms	Bacteria	Proteobacteria	Gammaproteobacteria	Gammaproteobacteria incertae sedis	Candidatus Kentron	unclassified Candidatus Kentron	Candidatus Kentron sp. SD
1	root	cellular organisms	Bacteria	Proteobacteria	Gammaproteobacteria	Orbales	Orbaceae	Gilliamella
1	root	cellular organisms	Bacteria	Terrabacteria group	Firmicutes	Clostridia	Eubacteriales	Eubacteriales incertae sedis	Natranaerovirga	Natranaerovirga hydrolytica
1	root	cellular organisms	Bacteria	Elusimicrobia	unclassified Elusimicrobia	Elusimicrobia bacterium CG08_land_8_20_14_0_20_51_18
2	root	cellular organisms	Eukaryota	Viridiplantae	Chlorophyta	core chlorophytes	Chlorophyceae	CS clade	Sphaeropleales	Selenastraceae
2	root	cellular organisms	Eukaryota	Opisthokonta	Fungi	Dikarya	Basidiomycota	Agaricomycotina	Agaricomycetes	Agaricomycetes incertae sedis	Cantharellales	Hydnaceae	Hydnum	Hydnum rufescens	Hydnum rufescens UP504
1	root	cellular organisms	Eukaryota	Opisthokonta	Fungi	Dikarya	Ascomycota	saccharomyceta	Pezizomycotina	leotiomyceta	sordariomyceta	Sordariomycetes	Sordariomycetidae	Magnaporthales	Pyriculariaceae	Pyricularia	Pyricularia oryzae
1	root	cellular organisms	Bacteria	Proteobacteria	Betaproteobacteria	Neisseriales	Chromobacteriaceae	Chromobacterium group	Iodobacter	Iodobacter fluviatilis
1	root	cellular organisms	Eukaryota	Opisthokonta	Fungi	Dikarya	Ascomycota	saccharomyceta	Pezizomycotina	leotiomyceta	Eurotiomycetes	Eurotiomycetidae	Eurotiales	Aspergillaceae	Aspergillus	Aspergillus ibericus	Aspergillus ibericus CBS 121593
1	root	cellular organisms	Bacteria	Acidobacteria	Acidobacteriia	Acidobacteriales	Acidobacteriaceae	Acidipila	unclassified Acidipila	Acidipila sp. 4G-K13
1	root	cellular organisms	Bacteria	Bacteria incertae sedis	Bacteria candidate phyla	candidate division CPR1	candidate division CPR1 bacterium ADurb.Bin160
1	root	cellular organisms	Eukaryota	Opisthokonta	Fungi	Dikarya	Ascomycota	saccharomyceta	Pezizomycotina	leotiomyceta	sordariomyceta	Sordariomycetes	Hypocreomycetidae	Hypocreales	Cordycipitaceae	Akanthomyces	Akanthomyces lecanii
1	root	cellular organisms	Bacteria	Proteobacteria	Betaproteobacteria	Burkholderiales	Comamonadaceae	Delftia	Delftia lacustris
1	root	cellular organisms	Bacteria	Terrabacteria group	Chloroflexi	Ktedonobacteria	Ktedonobacterales	Reticulibacteraceae	Reticulibacter	Reticulibacter mediterranei
1	root	cellular organisms	Bacteria	FCB group	Bacteroidetes/Chlorobi group	Bacteroidetes	Flavobacteriia	Flavobacteriales	Flavobacteriaceae	Flavobacterium	Flavobacterium erciyesense
1	root	cellular organisms	Bacteria	Proteobacteria	Alphaproteobacteria	Hyphomicrobiales	Bradyrhizobiaceae	Bradyrhizobium	Bradyrhizobium icense
1	root	cellular organisms	Bacteria	Terrabacteria group	Firmicutes	Clostridia	Eubacteriales	Lachnospiraceae	unclassified Lachnospiraceae	Lachnospiraceae bacterium oral taxon 500
1	root	cellular organisms	Bacteria	Terrabacteria group	Actinobacteria	Actinomycetia	Micromonosporales	Micromonosporaceae	Actinoplanes	unclassified Actinoplanes	Actinoplanes sp. L3-i22
1	root	cellular organisms	Bacteria	Proteobacteria	Gammaproteobacteria	Enterobacterales	Enterobacteriaceae	Citrobacter
1	root	cellular organisms	Bacteria	FCB group	Bacteroidetes/Chlorobi group	Bacteroidetes	Flavobacteriia	Flavobacteriales	Weeksellaceae	Chryseobacterium group	Chryseobacterium	unclassified Chryseobacterium	Chryseobacterium sp. X308
1	root	cellular organisms	Bacteria	Terrabacteria group	Firmicutes	Clostridia	Thermoanaerobacterales	Thermodesulfobiaceae	Thermodesulfobium	Thermodesulfobium narugense
1	root	cellular organisms	Bacteria	Proteobacteria	delta/epsilon subdivisions	Deltaproteobacteria	Desulfovibrionales	Desulfohalobiaceae	Desulfonatronovibrio	Desulfonatronovibrio hydrogenovorans
1	root	cellular organisms	Eukaryota	Opisthokonta	Fungi	Dikarya	Ascomycota	saccharomyceta	Pezizomycotina	leotiomyceta	sordariomyceta	Sordariomycetes	Hypocreomycetidae	Glomerellales	Glomerellaceae	Colletotrichum	Colletotrichum graminicola species complex	Colletotrichum sublineola
1	root	cellular organisms	Bacteria	Terrabacteria group	Actinobacteria	Actinomycetia	Corynebacteriales	Nocardiaceae	Nocardia	Nocardia beijingensis
1	root	cellular organisms	Bacteria	FCB group	Bacteroidetes/Chlorobi group	Bacteroidetes	Flavobacteriia	Flavobacteriales	Weeksellaceae	Riemerella
2	root	cellular organisms	Eukaryota	Sar	Alveolata	Apicomplexa	Aconoidasida	Haemosporida	Plasmodiidae	Plasmodium	Plasmodium (Plasmodium)	Plasmodium ovale
1	root	cellular organisms	Bacteria	Proteobacteria	Alphaproteobacteria	Hyphomicrobiales	Brucellaceae	Brucella/Ochrobactrum group
1	root	cellular organisms	Eukaryota	Opisthokonta	Fungi	Dikarya	Basidiomycota	Agaricomycotina	Agaricomycetes	Agaricomycetidae	Boletales	Sclerodermatineae	Boletinellaceae	Phlebopus	unclassified Phlebopus	Phlebopus sp. FC_14
1	root	cellular organisms	Bacteria	Proteobacteria	Gammaproteobacteria	Vibrionales	Vibrionaceae	Photobacterium	unclassified Photobacterium
1	root	cellular organisms	Bacteria	Terrabacteria group	Actinobacteria	unclassified Actinobacteria
1	root	cellular organisms	Bacteria	Proteobacteria	Betaproteobacteria	Neisseriales	Chromobacteriaceae	Paludibacterium	Paludibacterium purpuratum
1	root	cellular organisms	Bacteria	Terrabacteria group	Firmicutes	Bacilli	Lactobacillales	Streptococcaceae	Streptococcus	Streptococcus suis
4	root	cellular organisms	Eukaryota	Viridiplantae	Chlorophyta	Pedinophyceae	unclassified Pedinophyceae	Pedinophyceae sp. YPF-701
1	root	cellular organisms	Bacteria	Terrabacteria group	Actinobacteria	Actinomycetia	Micromonosporales	Micromonosporaceae	Micromonospora	unclassified Micromonospora	Micromonospora sp. M71_S20
1	root	cellular organisms	Bacteria	Proteobacteria	Betaproteobacteria	Burkholderiales	Comamonadaceae	unclassified Comamonadaceae	Comamonadaceae bacterium
1	root	cellular organisms	Eukaryota	Opisthokonta	Fungi	Dikarya	Ascomycota	saccharomyceta	Pezizomycotina	leotiomyceta	Eurotiomycetes	Eurotiomycetidae	Eurotiales	Aspergillaceae	Aspergillus	Aspergillus thermomutatus
3	root	cellular organisms	Eukaryota	Opisthokonta	Fungi	Fungi incertae sedis	Zoopagomycota	Kickxellomycotina	Kickxellomycetes	Kickxellales	Kickxellaceae	Linderina	Linderina pennispora
1	root	cellular organisms	Bacteria	Proteobacteria	Gammaproteobacteria	Moraxellales	Moraxellaceae	Psychrobacter	Psychrobacter pasteurii
1	root	cellular organisms	Bacteria	FCB group	Bacteroidetes/Chlorobi group	Bacteroidetes	Bacteroidia	Marinilabiliales	Marinilabiliaceae	Carboxylicivirga	Carboxylicivirga sediminis
1	root	cellular organisms	Eukaryota	Opisthokonta	Fungi	Dikarya	Ascomycota	saccharomyceta	Pezizomycotina	leotiomyceta	dothideomyceta	Dothideomycetes	Dothideomycetes incertae sedis	Lineolatales	Lineolataceae	Lineolata	Lineolata rhizophorae
1	root	cellular organisms	Bacteria	Terrabacteria group	Firmicutes	Bacilli	Lactobacillales	Streptococcaceae	Streptococcus	environmental samples	uncultured Streptococcus sp.
1	root	cellular organisms	Eukaryota	Opisthokonta	Fungi	Dikarya	Basidiomycota	Agaricomycotina	Agaricomycetes	Agaricomycetidae	Agaricales	Amanitaceae	Amanita	Amanita polypyramis	Amanita polypyramis BW_CC
1	root	cellular organisms	Bacteria	Proteobacteria	Alphaproteobacteria	Rickettsiales	Anaplasmataceae	Wolbachieae	Wolbachia	unclassified Wolbachia	Wolbachia endosymbiont of Dipetalonema caudispina
1	root	cellular organisms	Bacteria	FCB group	Bacteroidetes/Chlorobi group	Bacteroidetes	Flavobacteriia	Flavobacteriales	Flavobacteriaceae	Spongiivirga	Spongiivirga citrea
1	root	cellular organisms	Bacteria	Proteobacteria	Betaproteobacteria	Rhodocyclales	Rhodocyclaceae	Azovibrio	Azovibrio restrictus
1	root	cellular organisms	Bacteria	Terrabacteria group	Firmicutes	Clostridia	Eubacteriales	Lachnospiraceae	Mediterraneibacter	[Ruminococcus] gnavus
2	root	cellular organisms	Bacteria	Proteobacteria	Alphaproteobacteria	Rhodobacterales	Rhodobacteraceae	Frigidibacter	Frigidibacter mobilis
2	root	cellular organisms	Bacteria	Proteobacteria	Betaproteobacteria	Burkholderiales	Burkholderiaceae	Polynucleobacter	Polynucleobacter aenigmaticus
1	root	cellular organisms	Bacteria	FCB group	Bacteroidetes/Chlorobi group	Bacteroidetes	Flavobacteriia	Flavobacteriales	Weeksellaceae	Faecalibacter	Faecalibacter macacae
1	root	cellular organisms	Bacteria	Terrabacteria group	Firmicutes	Bacilli	Bacillales	Planococcaceae	Bhargavaea	Bhargavaea cecembensis
1	root	cellular organisms	Archaea	Euryarchaeota	Stenosarchaea group	Methanomicrobia	Methanosarcinales	Methanosarcinaceae	Methanosarcina	Methanosarcina mazei	Methanosarcina mazei Go1
1	root	cellular organisms	Bacteria	Proteobacteria	Alphaproteobacteria	Hyphomicrobiales	Methylobacteriaceae
1	root	cellular organisms	Bacteria	Terrabacteria group	Chloroflexi	Anaerolineae	Anaerolineales	Anaerolineaceae	Anaerolinea	Anaerolinea thermophila
1	root	cellular organisms	Eukaryota	Opisthokonta	Fungi	Dikarya	Ascomycota	saccharomyceta	Pezizomycotina	leotiomyceta	sordariomyceta	Leotiomycetes	Helotiales	Hyaloscyphaceae	Hyaloscypha	Hyaloscypha hepaticicola/Rhizoscyphus ericae species complex	Hyaloscypha variabilis	Hyaloscypha variabilis F
1	root	cellular organisms	Bacteria	Proteobacteria	Gammaproteobacteria	Nevskiales	Sinobacteraceae	Hydrocarboniphaga	Hydrocarboniphaga effusa
1	root	cellular organisms	Bacteria	PVC group	Lentisphaerae	Lentisphaeria
1	root	cellular organisms	Bacteria	Bacteria incertae sedis	Bacteria candidate phyla	Patescibacteria group	Parcubacteria group	Candidatus Uhrbacteria	Candidatus Uhrbacteria bacterium GW2011_GWF2_39_13
1	root	cellular organisms	Bacteria	Proteobacteria	Alphaproteobacteria	Hyphomicrobiales	Brucellaceae	Brucella/Ochrobactrum group	Brucella	Brucella melitensis	Brucella melitensis bv. 2	Brucella melitensis bv. 2 str. 63/9
1	root	cellular organisms	Bacteria	Proteobacteria	Betaproteobacteria	Betaproteobacteria incertae sedis	Candidatus Accumulibacter
1	root	cellular organisms	Bacteria	Proteobacteria	Gammaproteobacteria	Pseudomonadales	Pseudomonadaceae	Pseudomonas	unclassified Pseudomonas	Pseudomonas sp. BF-R-19
2	root	cellular organisms	Bacteria	FCB group	Bacteroidetes/Chlorobi group	Bacteroidetes	Flavobacteriia	Flavobacteriales	Flavobacteriaceae	Flavobacterium	Flavobacterium aquariorum
1	root	cellular organisms	Eukaryota	Sar	Stramenopiles	Ochrophyta	Bacillariophyta	Coscinodiscophyceae	Thalassiosirophycidae	Thalassiosirales	Thalassiosiraceae	Thalassiosira	Thalassiosira pseudonana	Thalassiosira pseudonana CCMP1335
1	root	cellular organisms	Bacteria	Proteobacteria	Alphaproteobacteria	Rhodospirillales	Azospirillaceae	Azospirillum	Azospirillum brasilense
1	root	cellular organisms	Bacteria	Nitrospinae/Tectomicrobia group	Nitrospinae	Nitrospinia	Nitrospinales	Nitrospinaceae	Nitrospina	Nitrospina gracilis
1	root	cellular organisms	Eukaryota	Opisthokonta	Fungi	Fungi incertae sedis	Mucoromycota	Mucoromycotina	Endogonomycetes	Endogonales	Endogonales incertae sedis	Bifiguratus	Bifiguratus adelaidae
1	root	cellular organisms	Bacteria	Terrabacteria group	Firmicutes	Erysipelotrichia	Erysipelotrichales	Erysipelotrichaceae	Allobaculum	unclassified Allobaculum	Allobaculum sp. 539
1	root	cellular organisms	Bacteria	FCB group	Bacteroidetes/Chlorobi group	Bacteroidetes	Sphingobacteriia	Sphingobacteriales	Sphingobacteriaceae	Pelobium	Pelobium manganitolerans
1	root	cellular organisms	Bacteria	FCB group	Bacteroidetes/Chlorobi group	Bacteroidetes	Flavobacteriia	Flavobacteriales	Flavobacteriaceae	Flavobacterium	Flavobacterium fluviatile
1	root	cellular organisms	Bacteria	Proteobacteria	Gammaproteobacteria	Chromatiales	Chromatiaceae	Allochromatium	Allochromatium tepidum
1	root	cellular organisms	Bacteria	Proteobacteria	delta/epsilon subdivisions	Epsilonproteobacteria	Nautiliales	Nautiliaceae	Lebetimonas	unclassified Lebetimonas
1	root	cellular organisms	Bacteria	Terrabacteria group	Firmicutes	Clostridia	Eubacteriales	Oscillospiraceae
1	root	cellular organisms	Bacteria	Terrabacteria group	Actinobacteria	Actinomycetia	Streptomycetales	Streptomycetaceae	Streptomyces	unclassified Streptomyces	Streptomyces sp. RLB3-6
3	root	cellular organisms	Bacteria	FCB group	Bacteroidetes/Chlorobi group	Bacteroidetes	Flavobacteriia	Flavobacteriales	Flavobacteriaceae	Flavobacterium	Flavobacterium orientale
1	root	cellular organisms	Bacteria	FCB group	Bacteroidetes/Chlorobi group	Bacteroidetes	Flavobacteriia	unclassified Flavobacteriia	Flavobacteria bacterium GWA2_35_26
1	root	Viruses	Duplodnaviria	Heunggongvirae	Uroviricota	Caudoviricetes	Caudovirales	Siphoviridae	unclassified Siphoviridae	Proteus phage Saba
2	root	cellular organisms	Bacteria	PVC group	Verrucomicrobia	unclassified Verrucomicrobia
1	root	cellular organisms	Bacteria	Proteobacteria	Gammaproteobacteria	Enterobacterales	Morganellaceae	Photorhabdus
1	root	Viruses	Duplodnaviria	Heunggongvirae	Uroviricota	Caudoviricetes	Caudovirales	Myoviridae	Phikzvirus	unclassified Phikzvirus
1	root	cellular organisms	Eukaryota	Opisthokonta	Fungi	Dikarya	Ascomycota	saccharomyceta	Pezizomycotina	leotiomyceta	sordariomyceta	Sordariomycetes	Hypocreomycetidae	Hypocreales	Cordycipitaceae	Cordyceps	Cordyceps fumosorosea	Cordyceps fumosorosea ARSEF 2679
1	root	cellular organisms	Bacteria	FCB group	Bacteroidetes/Chlorobi group	Bacteroidetes	Bacteroidia	Bacteroidales	Williamwhitmaniaceae	Williamwhitmania	Williamwhitmania taraxaci
1	root	cellular organisms	Bacteria	FCB group	Bacteroidetes/Chlorobi group	Bacteroidetes	Chitinophagia	Chitinophagales	Chitinophagaceae	Chitinophaga	Chitinophaga lutea
1	root	cellular organisms	Bacteria	Terrabacteria group	Chloroflexi	Chloroflexia	Chloroflexales	Chloroflexineae	Oscillochloridaceae	Oscillochloris	Oscillochloris trichoides
1	root	cellular organisms	Eukaryota	Opisthokonta	Fungi	Dikarya	Ascomycota	saccharomyceta	Pezizomycotina
1	root	cellular organisms	Eukaryota	Opisthokonta	Fungi	Dikarya	Basidiomycota	Wallemiomycotina	Wallemiomycetes	Wallemiales	Wallemiaceae	Wallemia	Wallemia hederae
1	root	cellular organisms	Bacteria	Proteobacteria	Gammaproteobacteria	Vibrionales	Vibrionaceae	Vibrio	Vibrio quintilis
[truncated: 3,943 more rows]

## Sheet: Fig 3A
		BS14 and SR1 COG Categories
[truncated: 9 more rows]

[truncated: 19 more sheets: Fig 3B, Fig 4A, Fig 4B, Fig 4C, Fig 4D, Fig 5A, Fig 5B, Fig 6A, Fig 6B, Fig 7, Fig 8, Fig 9, Fig 10, Fig 11A, Fig 11B, Fig 12A, Fig 12B, Fig 12C, Fig 12D]
